# Supplementary material for: The Identification and Analysis of mRNA–lncRNA–miRNA Cliques From the Integrative Network of Ovarian Cancer
Source: Front Genet. 2019 Aug 21;10:751. doi: 10.3389/fgene.2019.00751 (PMC6712160; doi:10.3389/fgene.2019.00751)
Supplement: Supplementary Material 2 — Constructed integrative network. [file Table_2.xlsx]

## Sheet: Sheet1
Target	Regulator	adjust R^2
ENSG00000000419.7,DPM1,coding,chr20:48984810-49008499	ENSG00000124217.3,MOCS3,coding,chr20:49008769-49011227	0.858732
ENSG00000000419.7,DPM1,coding,chr20:48984810-49008499	ENSG00000022277.8,C20orf43,coding,chr20:54477053-54527350	0.858732
ENSG00000000419.7,DPM1,coding,chr20:48984810-49008499	ENSG00000124207.10,CSE1L,coding,chr20:47096244-47146896	0.858732
ENSG00000000419.7,DPM1,coding,chr20:48984810-49008499	ENSG00000031691.5,CENPQ,coding,chr6:49539054-49568779	0.858732
ENSG00000000419.7,DPM1,coding,chr20:48984810-49008499	ENSG00000008324.6,SS18L2,coding,chr3:42598335-42611610	0.858732
ENSG00000000419.7,DPM1,coding,chr20:48984810-49008499	ENSG00000020256.14,ZFP64,coding,chr20:50101608-50254254	0.858732
ENSG00000000419.7,DPM1,coding,chr20:48984810-49008499	ENSG00000004779.4,NDUFAB1,coding,chr16:23499823-23515178	0.858732
ENSG00000000419.7,DPM1,coding,chr20:48984810-49008499	ENSG00000101126.9,ADNP,coding,chr20:48938991-48981365	0.858732
ENSG00000000419.7,DPM1,coding,chr20:48984810-49008499	ENSG00000023572.4,GLRX2,coding,chr1:191332220-191341867	0.858732
ENSG00000000419.7,DPM1,coding,chr20:48984810-49008499	ENSG00000033327.8,GAB2,coding,chr11:77603990-77807042	0.858732
ENSG00000000419.7,DPM1,coding,chr20:48984810-49008499	ENSG00000005339.6,CREBBP,coding,chr16:3715055-3870723	0.858732
ENSG00000000419.7,DPM1,coding,chr20:48984810-49008499	ENSG00000004059.5,ARF5,coding,chr7:127015634-127018995	0.858732
ENSG00000000419.7,DPM1,coding,chr20:48984810-49008499	ENSG00000000460.11,C1orf112,coding,chr1:167897868-168089845	0.858732
ENSG00000000419.7,DPM1,coding,chr20:48984810-49008499	ENSG00000062598.12,ELMO2,coding,chr20:44428094-44495111	0.858732
ENSG00000000419.7,DPM1,coding,chr20:48984810-49008499	ENSG00000001461.11,NIPAL3,coding,chr1:24614870-24672053	0.858732
ENSG00000000419.7,DPM1,coding,chr20:48984810-49008499	ENSG00000010278.6,CD9,coding,chr12:6179141-6217688	0.858732
ENSG00000000419.7,DPM1,coding,chr20:48984810-49008499	ENSG00000255129.1,RP11-839D17.3.1,lncRNA,chr11:112654368-112690369	0.858732
ENSG00000000419.7,DPM1,coding,chr20:48984810-49008499	ENSG00000001561.5,ENPP4,coding,chr6:46205659-46222394	0.858732
ENSG00000000419.7,DPM1,coding,chr20:48984810-49008499	ENSG00000006756.11,ARSD,coding,chrX:2832010-2857392	0.858732
ENSG00000000419.7,DPM1,coding,chr20:48984810-49008499	ENSG00000033011.5,ALG1,coding,chr16:5023703-5075396	0.858732
ENSG00000000419.7,DPM1,coding,chr20:48984810-49008499	ENSG00000157450.11,RNF111,coding,chr15:56944665-57176910	0.858732
ENSG00000000419.7,DPM1,coding,chr20:48984810-49008499	ENSG00000133627.12,ACTR3B,coding,chr7:152087766-152183396	0.858732
ENSG00000000419.7,DPM1,coding,chr20:48984810-49008499	ENSG00000000003.9,TSPAN6,coding,chrX:99770322-99781644	0.858732
ENSG00000000419.7,DPM1,coding,chr20:48984810-49008499	ENSG00000002330.8,BAD,coding,chr11:63793877-63808752	0.858732
ENSG00000000419.7,DPM1,coding,chr20:48984810-49008499	ENSG00000010539.6,ZNF200,coding,chr16:3212325-3225457	0.858732
ENSG00000000419.7,DPM1,coding,chr20:48984810-49008499	ENSG00000000938.7,FGR,coding,chr1:27811161-27834375	0.858732
ENSG00000000419.7,DPM1,coding,chr20:48984810-49008499	ENSG00000001617.7,SEMA3F,coding,chr3:50167481-50201512	0.858732
ENSG00000000419.7,DPM1,coding,chr20:48984810-49008499	ENSG00000006659.7,LGALS14,coding,chr19:44886785-44891927	0.858732
ENSG00000000419.7,DPM1,coding,chr20:48984810-49008499	ENSG00000007402.7,CACNA2D2,coding,chr3:50375236-50516679	0.858732
ENSG00000000419.7,DPM1,coding,chr20:48984810-49008499	ENSG00000062716.4,VMP1,coding,chr17:55139644-55272732	0.858732
ENSG00000000419.7,DPM1,coding,chr20:48984810-49008499	ENSG00000011021.17,CLCN6,coding,chr1:11788793-11825788	0.858732
ENSG00000000419.7,DPM1,coding,chr20:48984810-49008499	ENSG00000069018.12,TRPC7,coding,chr5:135576897-135729124	0.858732
ENSG00000000419.7,DPM1,coding,chr20:48984810-49008499	ENSG00000011258.9,MBTD1,coding,chr17:46609784-46692523	0.858732
ENSG00000000419.7,DPM1,coding,chr20:48984810-49008499	ENSG00000155592.10,ZKSCAN2,coding,chr16:25154822-25176753	0.858732
ENSG00000000419.7,DPM1,coding,chr20:48984810-49008499	ENSG00000188038.2,NRN1L,coding,chr16:66476281-66477776	0.858732
ENSG00000000457.8,SCYL3,coding,chr1:168088427-168130032	ENSG00000010165.13,METTL13,coding,chr1:170017410-170049786	0.867939
ENSG00000000457.8,SCYL3,coding,chr1:168088427-168130032	ENSG00000000460.11,C1orf112,coding,chr1:167897868-168089845	0.867939
ENSG00000000457.8,SCYL3,coding,chr1:168088427-168130032	ENSG00000131844.11,MCCC2,coding,chr5:70918870-70990287	0.867939
ENSG00000000457.8,SCYL3,coding,chr1:168088427-168130032	ENSG00000075945.8,KIFAP3,coding,chr1:168157090-168320973	0.867939
ENSG00000000457.8,SCYL3,coding,chr1:168088427-168130032	ENSG00000001167.10,NFYA,coding,chr6:41148661-41175693	0.867939
ENSG00000000457.8,SCYL3,coding,chr1:168088427-168130032	ENSG00000003756.11,RBM5,coding,chr3:50101344-50131458	0.867939
ENSG00000000457.8,SCYL3,coding,chr1:168088427-168130032	ENSG00000001631.9,KRIT1,coding,chr7:91666218-91713416	0.867939
ENSG00000000457.8,SCYL3,coding,chr1:168088427-168130032	ENSG00000054277.8,OPN3,coding,chr1:239820026-239907301	0.867939
ENSG00000000457.8,SCYL3,coding,chr1:168088427-168130032	ENSG00000003056.3,M6PR,coding,chr12:8984225-8993818	0.867939
ENSG00000000457.8,SCYL3,coding,chr1:168088427-168130032	ENSG00000005075.11,POLR2J,coding,chr7:101900569-101906359	0.867939
ENSG00000000457.8,SCYL3,coding,chr1:168088427-168130032	ENSG00000068912.9,ERLEC1,coding,chr2:53867684-53899460	0.867939
ENSG00000000457.8,SCYL3,coding,chr1:168088427-168130032	ENSG00000104517.7,UBR5,coding,chr8:103333676-103494245	0.867939
ENSG00000000457.8,SCYL3,coding,chr1:168088427-168130032	ENSG00000016864.11,GLT8D1,coding,chr3:52703544-52715088	0.867939
ENSG00000000457.8,SCYL3,coding,chr1:168088427-168130032	ENSG00000005175.5,RPAP3,coding,chr12:46343336-46386111	0.867939
ENSG00000000457.8,SCYL3,coding,chr1:168088427-168130032	ENSG00000001630.10,CYP51A1,coding,chr7:91579400-91610202	0.867939
ENSG00000000457.8,SCYL3,coding,chr1:168088427-168130032	ENSG00000004534.9,RBM6,coding,chr3:49952443-50112482	0.867939
ENSG00000000457.8,SCYL3,coding,chr1:168088427-168130032	ENSG00000010322.10,NISCH,coding,chr3:52464173-52502127	0.867939
ENSG00000000457.8,SCYL3,coding,chr1:168088427-168130032	ENSG00000001460.12,C1orf201,coding,chr1:24556075-24616011	0.867939
ENSG00000000457.8,SCYL3,coding,chr1:168088427-168130032	ENSG00000092036.12,HAUS4,coding,chr14:22485276-22496210	0.867939
ENSG00000000457.8,SCYL3,coding,chr1:168088427-168130032	ENSG00000002919.9,SNX11,coding,chr17:43539909-43555104	0.867939
ENSG00000000457.8,SCYL3,coding,chr1:168088427-168130032	ENSG00000010292.7,NCAPD2,coding,chr12:6472782-6511382	0.867939
ENSG00000000457.8,SCYL3,coding,chr1:168088427-168130032	ENSG00000001461.11,NIPAL3,coding,chr1:24614870-24672053	0.867939
ENSG00000000457.8,SCYL3,coding,chr1:168088427-168130032	ENSG00000005243.4,COPZ2,coding,chr17:43458533-43470138	0.867939
ENSG00000000457.8,SCYL3,coding,chr1:168088427-168130032	ENSG00000000003.9,TSPAN6,coding,chrX:99770322-99781644	0.867939
ENSG00000000457.8,SCYL3,coding,chr1:168088427-168130032	ENSG00000123342.11,MMP19,coding,chr12:54515483-54523017	0.867939
ENSG00000000457.8,SCYL3,coding,chr1:168088427-168130032	ENSG00000006756.11,ARSD,coding,chrX:2832010-2857392	0.867939
ENSG00000000457.8,SCYL3,coding,chr1:168088427-168130032	ENSG00000000971.10,CFH,coding,chr1:194887630-194983257	0.867939
ENSG00000000457.8,SCYL3,coding,chr1:168088427-168130032	ENSG00000051341.8,POLQ,coding,chr3:122632963-122748178	0.867939
ENSG00000000457.8,SCYL3,coding,chr1:168088427-168130032	ENSG00000006634.3,DBF4,coding,chr7:87343466-87376792	0.867939
ENSG00000000457.8,SCYL3,coding,chr1:168088427-168130032	ENSG00000067992.8,PDK3,coding,chrX:24393258-24467875	0.867939
ENSG00000000457.8,SCYL3,coding,chr1:168088427-168130032	ENSG00000020577.8,SAMD4A,coding,chr14:54103564-54329783	0.867939
ENSG00000000457.8,SCYL3,coding,chr1:168088427-168130032	ENSG00000073737.11,DHRS9,coding,chr2:169629544-169660923	0.867939
ENSG00000000457.8,SCYL3,coding,chr1:168088427-168130032	ENSG00000001036.8,FUCA2,coding,chr6:143858306-143874520	0.867939
ENSG00000000457.8,SCYL3,coding,chr1:168088427-168130032	ENSG00000004777.10,ARHGAP33,coding,chr19:40958256-40971564	0.867939
ENSG00000000457.8,SCYL3,coding,chr1:168088427-168130032	ENSG00000005102.8,MEOX1,coding,chr17:39073281-39094848	0.867939
ENSG00000000457.8,SCYL3,coding,chr1:168088427-168130032	ENSG00000062822.6,POLD1,coding,chr19:55579404-55613082	0.867939
ENSG00000000460.11,C1orf112,coding,chr1:167897868-168089845	ENSG00000120334.11,CENPL,coding,chr1:172035310-172060481	0.885718
ENSG00000000460.11,C1orf112,coding,chr1:167897868-168089845	ENSG00000051341.8,POLQ,coding,chr3:122632963-122748178	0.885718
ENSG00000000460.11,C1orf112,coding,chr1:167897868-168089845	ENSG00000080839.7,RBL1,coding,chr20:35058165-35157812	0.885718
ENSG00000000460.11,C1orf112,coding,chr1:167897868-168089845	ENSG00000000457.8,SCYL3,coding,chr1:168088427-168130032	0.885718
ENSG00000000460.11,C1orf112,coding,chr1:167897868-168089845	ENSG00000085999.6,RAD54L,coding,chr1:46485946-46516732	0.885718
ENSG00000000460.11,C1orf112,coding,chr1:167897868-168089845	ENSG00000058804.9,TMEM48,coding,chr1:54003720-54077121	0.885718
ENSG00000000460.11,C1orf112,coding,chr1:167897868-168089845	ENSG00000035499.8,DEPDC1B,coding,chr5:59928495-60031774	0.885718
ENSG00000000460.11,C1orf112,coding,chr1:167897868-168089845	ENSG00000013375.9,PGM3,coding,chr6:83927587-83960374	0.885718
ENSG00000000460.11,C1orf112,coding,chr1:167897868-168089845	ENSG00000010292.7,NCAPD2,coding,chr12:6472782-6511382	0.885718
ENSG00000000460.11,C1orf112,coding,chr1:167897868-168089845	ENSG00000001167.10,NFYA,coding,chr6:41148661-41175693	0.885718
ENSG00000000460.11,C1orf112,coding,chr1:167897868-168089845	ENSG00000011426.6,ANLN,coding,chr7:36395939-36459925	0.885718
ENSG00000000460.11,C1orf112,coding,chr1:167897868-168089845	ENSG00000006634.3,DBF4,coding,chr7:87343466-87376792	0.885718
ENSG00000000460.11,C1orf112,coding,chr1:167897868-168089845	ENSG00000003393.10,ALS2,coding,chr2:202273521-202354157	0.885718
ENSG00000000460.11,C1orf112,coding,chr1:167897868-168089845	ENSG00000005189.14,AC004381.6.1,coding,chr16:20725251-20768491	0.885718
ENSG00000000460.11,C1orf112,coding,chr1:167897868-168089845	ENSG00000007968.6,E2F2,coding,chr1:23705508-23730299	0.885718
ENSG00000000460.11,C1orf112,coding,chr1:167897868-168089845	ENSG00000004487.10,KDM1A,coding,chr1:23218527-23282769	0.885718
ENSG00000000460.11,C1orf112,coding,chr1:167897868-168089845	ENSG00000075945.8,KIFAP3,coding,chr1:168157090-168320973	0.885718
ENSG00000000460.11,C1orf112,coding,chr1:167897868-168089845	ENSG00000001084.6,GCLC,coding,chr6:53470097-53589727	0.885718
ENSG00000000460.11,C1orf112,coding,chr1:167897868-168089845	ENSG00000001036.8,FUCA2,coding,chr6:143858306-143874520	0.885718
ENSG00000000460.11,C1orf112,coding,chr1:167897868-168089845	ENSG00000011007.7,TCEB3,coding,chr1:23942231-23961136	0.885718
ENSG00000000460.11,C1orf112,coding,chr1:167897868-168089845	ENSG00000000003.9,TSPAN6,coding,chrX:99770322-99781644	0.885718
ENSG00000000460.11,C1orf112,coding,chr1:167897868-168089845	ENSG00000004777.10,ARHGAP33,coding,chr19:40958256-40971564	0.885718
ENSG00000000460.11,C1orf112,coding,chr1:167897868-168089845	ENSG00000000419.7,DPM1,coding,chr20:48984810-49008499	0.885718
ENSG00000000460.11,C1orf112,coding,chr1:167897868-168089845	ENSG00000001497.12,LAS1L,coding,chrX:64649186-64671380	0.885718
ENSG00000000460.11,C1orf112,coding,chr1:167897868-168089845	ENSG00000083896.7,YTHDC1,coding,chr4:68858699-68898402	0.885718
ENSG00000000460.11,C1orf112,coding,chr1:167897868-168089845	ENSG00000007047.8,MARK4,coding,chr19:50446389-50500381	0.885718
ENSG00000000460.11,C1orf112,coding,chr1:167897868-168089845	ENSG00000234694.1,RP1-92O14.3.1,lncRNA,chr1:43592941-43596916	0.885718
ENSG00000000460.11,C1orf112,coding,chr1:167897868-168089845	ENSG00000005486.10,RHBDD2,coding,chr7:75309855-75356180	0.885718
ENSG00000000460.11,C1orf112,coding,chr1:167897868-168089845	ENSG00000005379.10,BZRAP1,coding,chr17:53733596-53761151	0.885718
ENSG00000000460.11,C1orf112,coding,chr1:167897868-168089845	ENSG00000001460.12,C1orf201,coding,chr1:24556075-24616011	0.885718
ENSG00000000460.11,C1orf112,coding,chr1:167897868-168089845	ENSG00000004779.4,NDUFAB1,coding,chr16:23499823-23515178	0.885718
ENSG00000000460.11,C1orf112,coding,chr1:167897868-168089845	ENSG00000004799.6,PDK4,coding,chr7:95050746-95063764	0.885718
ENSG00000000460.11,C1orf112,coding,chr1:167897868-168089845	ENSG00000054282.10,SDCCAG8,coding,chr1:241485942-241730017	0.885718
ENSG00000000460.11,C1orf112,coding,chr1:167897868-168089845	ENSG00000023572.4,GLRX2,coding,chr1:191332220-191341867	0.885718
ENSG00000000460.11,C1orf112,coding,chr1:167897868-168089845	ENSG00000023318.7,ERP44,coding,chr9:101781281-101901143	0.885718
ENSG00000000460.11,C1orf112,coding,chr1:167897868-168089845	ENSG00000034053.9,APBA2,coding,chr15:26998861-27197806	0.885718
ENSG00000000460.11,C1orf112,coding,chr1:167897868-168089845	ENSG00000005059.11,CCDC109B,coding,chr4:110700809-110829323	0.885718
ENSG00000000460.11,C1orf112,coding,chr1:167897868-168089845	ENSG00000048828.11,FAM120A,coding,chr9:95253993-95368218	0.885718
ENSG00000000938.7,FGR,coding,chr1:27811161-27834375	ENSG00000116701.9,NCF2,coding,chr1:181791320-181826634	0.906559
ENSG00000000938.7,FGR,coding,chr1:27811161-27834375	ENSG00000015285.6,WAS,coding,chrX:48419928-48434762	0.906559
ENSG00000000938.7,FGR,coding,chr1:27811161-27834375	ENSG00000010671.10,BTK,coding,chrX:100491090-100527839	0.906559
ENSG00000000938.7,FGR,coding,chr1:27811161-27834375	ENSG00000005844.11,ITGAL,coding,chr16:30391479-30441790	0.906559
ENSG00000000938.7,FGR,coding,chr1:27811161-27834375	ENSG00000010610.5,CD4,coding,chr12:6766284-6800235	0.906559
ENSG00000000938.7,FGR,coding,chr1:27811161-27834375	ENSG00000140379.7,BCL2A1,coding,chr15:78040285-78050843	0.906559
ENSG00000000938.7,FGR,coding,chr1:27811161-27834375	ENSG00000010295.13,IFFO1,coding,chr12:6517801-6535500	0.906559
ENSG00000000938.7,FGR,coding,chr1:27811161-27834375	ENSG00000088827.8,SIGLEC1,coding,chr20:3615616-3635775	0.906559
ENSG00000000938.7,FGR,coding,chr1:27811161-27834375	ENSG00000018280.12,SLC11A1,coding,chr2:218954995-218969861	0.906559
ENSG00000000938.7,FGR,coding,chr1:27811161-27834375	ENSG00000006075.10,CCL3,coding,chr17:31439714-31441628	0.906559
ENSG00000000938.7,FGR,coding,chr1:27811161-27834375	ENSG00000011422.6,PLAUR,coding,chr19:48842110-48866342	0.906559
ENSG00000000938.7,FGR,coding,chr1:27811161-27834375	ENSG00000019169.8,MARCO,coding,chr2:119416211-119468706	0.906559
ENSG00000000938.7,FGR,coding,chr1:27811161-27834375	ENSG00000004468.6,CD38,coding,chr4:15388995-15460167	0.906559
ENSG00000000938.7,FGR,coding,chr1:27811161-27834375	ENSG00000006074.3,CCL18,coding,chr17:31415752-31423505	0.906559
ENSG00000000938.7,FGR,coding,chr1:27811161-27834375	ENSG00000096060.8,FKBP5,coding,chr6:35649339-35804338	0.906559
ENSG00000000938.7,FGR,coding,chr1:27811161-27834375	ENSG00000005059.11,CCDC109B,coding,chr4:110700809-110829323	0.906559
ENSG00000000938.7,FGR,coding,chr1:27811161-27834375	ENSG00000002933.3,TMEM176A,coding,chr7:150128423-150133141	0.906559
ENSG00000000938.7,FGR,coding,chr1:27811161-27834375	ENSG00000003402.12,CFLAR,coding,chr2:201689071-201737278	0.906559
ENSG00000000938.7,FGR,coding,chr1:27811161-27834375	ENSG00000004399.8,PLXND1,coding,chr3:130756707-130808351	0.906559
ENSG00000000938.7,FGR,coding,chr1:27811161-27834375	ENSG00000002587.5,HS3ST1,coding,chr4:11003871-11040487	0.906559
ENSG00000000938.7,FGR,coding,chr1:27811161-27834375	ENSG00000002549.7,LAP3,coding,chr4:17187912-17218693	0.906559
ENSG00000000938.7,FGR,coding,chr1:27811161-27834375	ENSG00000003400.10,CASP10,coding,chr2:201755848-201802374	0.906559
ENSG00000000938.7,FGR,coding,chr1:27811161-27834375	ENSG00000000971.10,CFH,coding,chr1:194887630-194983257	0.906559
ENSG00000000938.7,FGR,coding,chr1:27811161-27834375	ENSG00000000003.9,TSPAN6,coding,chrX:99770322-99781644	0.906559
ENSG00000000938.7,FGR,coding,chr1:27811161-27834375	ENSG00000004478.5,FKBP4,coding,chr12:2774379-2784837	0.906559
ENSG00000000938.7,FGR,coding,chr1:27811161-27834375	ENSG00000005421.4,PON1,coding,chr7:94764923-94863609	0.906559
ENSG00000000938.7,FGR,coding,chr1:27811161-27834375	ENSG00000005961.11,ITGA2B,coding,chr17:39805075-39822399	0.906559
ENSG00000000938.7,FGR,coding,chr1:27811161-27834375	ENSG00000003249.8,DBNDD1,coding,chr16:88598773-88614037	0.906559
ENSG00000000938.7,FGR,coding,chr1:27811161-27834375	ENSG00000002919.9,SNX11,coding,chr17:43539909-43555104	0.906559
ENSG00000000938.7,FGR,coding,chr1:27811161-27834375	ENSG00000006468.9,ETV1,coding,chr7:13897377-13997575	0.906559
ENSG00000000938.7,FGR,coding,chr1:27811161-27834375	ENSG00000000419.7,DPM1,coding,chr20:48984810-49008499	0.906559
ENSG00000000938.7,FGR,coding,chr1:27811161-27834375	ENSG00000005882.6,PDK2,coding,chr17:45527099-45544515	0.906559
ENSG00000000938.7,FGR,coding,chr1:27811161-27834375	ENSG00000004660.9,CAMKK1,coding,chr17:3710357-3743087	0.906559
ENSG00000000938.7,FGR,coding,chr1:27811161-27834375	ENSG00000004897.5,CDC27,coding,chr17:42550067-42621787	0.906559
ENSG00000000938.7,FGR,coding,chr1:27811161-27834375	ENSG00000003096.9,KLHL13,coding,chrX:116915803-117135331	0.906559
ENSG00000000938.7,FGR,coding,chr1:27811161-27834375	ENSG00000250149.1,RP11-399F2.2.1,lncRNA,chr4:126817322-126893398	0.906559
ENSG00000000938.7,FGR,coding,chr1:27811161-27834375	ENSG00000001036.8,FUCA2,coding,chr6:143858306-143874520	0.906559
ENSG00000000938.7,FGR,coding,chr1:27811161-27834375	ENSG00000010319.2,SEMA3G,coding,chr3:52442108-52454141	0.906559
ENSG00000000938.7,FGR,coding,chr1:27811161-27834375	ENSG00000171936.1,OR10H3,coding,chr19:15713202-15714153	0.906559
ENSG00000000938.7,FGR,coding,chr1:27811161-27834375	ENSG00000139636.11,LMBR1L,coding,chr12:47777185-47790950	0.906559
ENSG00000000938.7,FGR,coding,chr1:27811161-27834375	ENSG00000172457.5,OR9G4,coding,chr11:56266878-56267863	0.906559
ENSG00000001167.10,NFYA,coding,chr6:41148661-41175693	ENSG00000064999.11,ANKS1A,coding,chr6:34965015-35193295	0.834832
ENSG00000001167.10,NFYA,coding,chr6:41148661-41175693	ENSG00000044090.4,CUL7,coding,chr6:43113332-43129661	0.834832
ENSG00000001167.10,NFYA,coding,chr6:41148661-41175693	ENSG00000024048.6,UBR2,coding,chr6:42639777-42769220	0.834832
ENSG00000001167.10,NFYA,coding,chr6:41148661-41175693	ENSG00000048544.5,MRPS10,coding,chr6:42282516-42293581	0.834832
ENSG00000001167.10,NFYA,coding,chr6:41148661-41175693	ENSG00000003393.10,ALS2,coding,chr2:202273521-202354157	0.834832
ENSG00000001167.10,NFYA,coding,chr6:41148661-41175693	ENSG00000000460.11,C1orf112,coding,chr1:167897868-168089845	0.834832
ENSG00000001167.10,NFYA,coding,chr6:41148661-41175693	ENSG00000001084.6,GCLC,coding,chr6:53470097-53589727	0.834832
ENSG00000001167.10,NFYA,coding,chr6:41148661-41175693	ENSG00000132436.7,FIGNL1,coding,chr7:50479324-50485582	0.834832
ENSG00000001167.10,NFYA,coding,chr6:41148661-41175693	ENSG00000010017.8,RANBP9,coding,chr6:13729708-13819932	0.834832
ENSG00000001167.10,NFYA,coding,chr6:41148661-41175693	ENSG00000007866.13,TEAD3,coding,chr6:35549351-35572839	0.834832
ENSG00000001167.10,NFYA,coding,chr6:41148661-41175693	ENSG00000120868.9,APAF1,coding,chr12:97563049-97653335	0.834832
ENSG00000001167.10,NFYA,coding,chr6:41148661-41175693	ENSG00000005156.5,LIG3,coding,chr17:30331654-30356196	0.834832
ENSG00000001167.10,NFYA,coding,chr6:41148661-41175693	ENSG00000000457.8,SCYL3,coding,chr1:168088427-168130032	0.834832
ENSG00000001167.10,NFYA,coding,chr6:41148661-41175693	ENSG00000001561.5,ENPP4,coding,chr6:46205659-46222394	0.834832
ENSG00000001167.10,NFYA,coding,chr6:41148661-41175693	ENSG00000041802.6,LSG1,coding,chr3:195842805-195874495	0.834832
ENSG00000001167.10,NFYA,coding,chr6:41148661-41175693	ENSG00000062650.11,WAPAL,coding,chr10:88184992-88271552	0.834832
ENSG00000001167.10,NFYA,coding,chr6:41148661-41175693	ENSG00000001631.9,KRIT1,coding,chr7:91666218-91713416	0.834832
ENSG00000001167.10,NFYA,coding,chr6:41148661-41175693	ENSG00000002330.8,BAD,coding,chr11:63793877-63808752	0.834832
ENSG00000001167.10,NFYA,coding,chr6:41148661-41175693	ENSG00000004399.8,PLXND1,coding,chr3:130756707-130808351	0.834832
ENSG00000001167.10,NFYA,coding,chr6:41148661-41175693	ENSG00000002834.11,LASP1,coding,chr17:34279781-34331549	0.834832
ENSG00000001167.10,NFYA,coding,chr6:41148661-41175693	ENSG00000013392.5,RWDD2A,coding,chr6:83959816-83963101	0.834832
ENSG00000001167.10,NFYA,coding,chr6:41148661-41175693	ENSG00000059758.3,CDK17,coding,chr12:95196169-95318469	0.834832
ENSG00000001167.10,NFYA,coding,chr6:41148661-41175693	ENSG00000007216.9,SLC13A2,coding,chr17:23824437-23848926	0.834832
ENSG00000001167.10,NFYA,coding,chr6:41148661-41175693	ENSG00000003137.4,CYP26B1,coding,chr2:72209874-72228675	0.834832
ENSG00000001167.10,NFYA,coding,chr6:41148661-41175693	ENSG00000005882.6,PDK2,coding,chr17:45527099-45544515	0.834832
ENSG00000001167.10,NFYA,coding,chr6:41148661-41175693	ENSG00000000003.9,TSPAN6,coding,chrX:99770322-99781644	0.834832
ENSG00000001167.10,NFYA,coding,chr6:41148661-41175693	ENSG00000004776.5,HSPB6,coding,chr19:40937309-40939770	0.834832
ENSG00000001167.10,NFYA,coding,chr6:41148661-41175693	ENSG00000005102.8,MEOX1,coding,chr17:39073281-39094848	0.834832
ENSG00000001167.10,NFYA,coding,chr6:41148661-41175693	ENSG00000005001.3,PRSS22,coding,chr16:2842728-2848172	0.834832
ENSG00000001167.10,NFYA,coding,chr6:41148661-41175693	ENSG00000004961.10,HCCS,coding,chrX:11039341-11051119	0.834832
ENSG00000001167.10,NFYA,coding,chr6:41148661-41175693	ENSG00000004139.8,SARM1,coding,chr17:23715504-23752173	0.834832
ENSG00000001167.10,NFYA,coding,chr6:41148661-41175693	ENSG00000022840.9,RNF10,coding,chr12:119455665-119499780	0.834832
ENSG00000001167.10,NFYA,coding,chr6:41148661-41175693	ENSG00000002822.9,MAD1L1,coding,chr7:1821908-2239404	0.834832
ENSG00000001167.10,NFYA,coding,chr6:41148661-41175693	ENSG00000075089.5,ACTR6,coding,chr12:99117030-99159774	0.834832
ENSG00000001167.10,NFYA,coding,chr6:41148661-41175693	ENSG00000005194.10,CIAPIN1,coding,chr16:56019581-56038941	0.834832
ENSG00000001460.12,C1orf201,coding,chr1:24556075-24616011	ENSG00000133226.10,SRRM1,coding,chr1:24830793-24872345	0.841633
ENSG00000001460.12,C1orf201,coding,chr1:24556075-24616011	ENSG00000004838.9,ZMYND10,coding,chr3:50353544-50359287	0.841633
ENSG00000001460.12,C1orf201,coding,chr1:24556075-24616011	ENSG00000004487.10,KDM1A,coding,chr1:23218527-23282769	0.841633
ENSG00000001460.12,C1orf201,coding,chr1:24556075-24616011	ENSG00000001461.11,NIPAL3,coding,chr1:24614870-24672053	0.841633
ENSG00000001460.12,C1orf201,coding,chr1:24556075-24616011	ENSG00000011009.5,LYPLA2,coding,chr1:23990046-23994616	0.841633
ENSG00000001460.12,C1orf201,coding,chr1:24556075-24616011	ENSG00000009780.10,FAM76A,coding,chr1:27925076-27961062	0.841633
ENSG00000001460.12,C1orf201,coding,chr1:24556075-24616011	ENSG00000010626.10,LRRC23,coding,chr12:6852993-6893668	0.841633
ENSG00000001460.12,C1orf201,coding,chr1:24556075-24616011	ENSG00000141013.10,GAS8,coding,chr16:88613537-88638884	0.841633
ENSG00000001460.12,C1orf201,coding,chr1:24556075-24616011	ENSG00000003393.10,ALS2,coding,chr2:202273521-202354157	0.841633
ENSG00000001460.12,C1orf201,coding,chr1:24556075-24616011	ENSG00000000457.8,SCYL3,coding,chr1:168088427-168130032	0.841633
ENSG00000001460.12,C1orf201,coding,chr1:24556075-24616011	ENSG00000183621.9,ZNF438,coding,chr10:31173568-31360872	0.841633
ENSG00000001460.12,C1orf201,coding,chr1:24556075-24616011	ENSG00000003249.8,DBNDD1,coding,chr16:88598773-88614037	0.841633
ENSG00000001460.12,C1orf201,coding,chr1:24556075-24616011	ENSG00000187554.7,TLR5,coding,chr1:221349370-221383247	0.841633
ENSG00000001460.12,C1orf201,coding,chr1:24556075-24616011	ENSG00000145217.9,SLC26A1,coding,chr4:962860-977228	0.841633
ENSG00000001460.12,C1orf201,coding,chr1:24556075-24616011	ENSG00000000938.7,FGR,coding,chr1:27811161-27834375	0.841633
ENSG00000001460.12,C1orf201,coding,chr1:24556075-24616011	ENSG00000003096.9,KLHL13,coding,chrX:116915803-117135331	0.841633
ENSG00000001460.12,C1orf201,coding,chr1:24556075-24616011	ENSG00000089818.11,NECAP1,coding,chr12:7817414-8141634	0.841633
ENSG00000001460.12,C1orf201,coding,chr1:24556075-24616011	ENSG00000023228.8,NDUFS1,coding,chr2:206694393-206732572	0.841633
ENSG00000001460.12,C1orf201,coding,chr1:24556075-24616011	ENSG00000000971.10,CFH,coding,chr1:194887630-194983257	0.841633
ENSG00000001460.12,C1orf201,coding,chr1:24556075-24616011	ENSG00000002919.9,SNX11,coding,chr17:43539909-43555104	0.841633
ENSG00000001460.12,C1orf201,coding,chr1:24556075-24616011	ENSG00000004779.4,NDUFAB1,coding,chr16:23499823-23515178	0.841633
ENSG00000001460.12,C1orf201,coding,chr1:24556075-24616011	ENSG00000041880.10,PARP3,coding,chr3:51951400-51957923	0.841633
ENSG00000001460.12,C1orf201,coding,chr1:24556075-24616011	ENSG00000000460.11,C1orf112,coding,chr1:167897868-168089845	0.841633
ENSG00000001460.12,C1orf201,coding,chr1:24556075-24616011	ENSG00000070214.10,SLC44A1,coding,chr9:107046723-107241273	0.841633
ENSG00000001460.12,C1orf201,coding,chr1:24556075-24616011	ENSG00000012963.8,UBR7,coding,chr14:92743153-92765314	0.841633
ENSG00000001460.12,C1orf201,coding,chr1:24556075-24616011	ENSG00000059728.6,MXD1,coding,chr2:69978323-70023581	0.841633
ENSG00000001629.5,ANKIB1,coding,chr7:91713483-91868634	ENSG00000001631.9,KRIT1,coding,chr7:91666218-91713416	0.829751
ENSG00000001629.5,ANKIB1,coding,chr7:91713483-91868634	ENSG00000004766.11,CCDC132,coding,chr7:92699588-92826274	0.829751
ENSG00000001629.5,ANKIB1,coding,chr7:91713483-91868634	ENSG00000003393.10,ALS2,coding,chr2:202273521-202354157	0.829751
ENSG00000001629.5,ANKIB1,coding,chr7:91713483-91868634	ENSG00000001630.10,CYP51A1,coding,chr7:91579400-91610202	0.829751
ENSG00000001629.5,ANKIB1,coding,chr7:91713483-91868634	ENSG00000008086.6,CDKL5,coding,chrX:18353623-18581670	0.829751
ENSG00000001629.5,ANKIB1,coding,chr7:91713483-91868634	ENSG00000036054.8,TBC1D23,coding,chr3:101462533-101526785	0.829751
ENSG00000001629.5,ANKIB1,coding,chr7:91713483-91868634	ENSG00000006831.9,ADIPOR2,coding,chr12:1668000-1768105	0.829751
ENSG00000001629.5,ANKIB1,coding,chr7:91713483-91868634	ENSG00000000460.11,C1orf112,coding,chr1:167897868-168089845	0.829751
ENSG00000001629.5,ANKIB1,coding,chr7:91713483-91868634	ENSG00000000457.8,SCYL3,coding,chr1:168088427-168130032	0.829751
ENSG00000001629.5,ANKIB1,coding,chr7:91713483-91868634	ENSG00000108395.8,TRIM37,coding,chr17:54414783-54539048	0.829751
ENSG00000001629.5,ANKIB1,coding,chr7:91713483-91868634	ENSG00000001461.11,NIPAL3,coding,chr1:24614870-24672053	0.829751
ENSG00000001629.5,ANKIB1,coding,chr7:91713483-91868634	ENSG00000007202.7,KIAA0100,coding,chr17:23965585-23996599	0.829751
ENSG00000001629.5,ANKIB1,coding,chr7:91713483-91868634	ENSG00000004779.4,NDUFAB1,coding,chr16:23499823-23515178	0.829751
ENSG00000001629.5,ANKIB1,coding,chr7:91713483-91868634	ENSG00000001084.6,GCLC,coding,chr6:53470097-53589727	0.829751
ENSG00000001629.5,ANKIB1,coding,chr7:91713483-91868634	ENSG00000108433.9,GOSR2,coding,chr17:42355484-42460002	0.829751
ENSG00000001629.5,ANKIB1,coding,chr7:91713483-91868634	ENSG00000002549.7,LAP3,coding,chr4:17187912-17218693	0.829751
ENSG00000001629.5,ANKIB1,coding,chr7:91713483-91868634	ENSG00000001036.8,FUCA2,coding,chr6:143858306-143874520	0.829751
ENSG00000001629.5,ANKIB1,coding,chr7:91713483-91868634	ENSG00000002919.9,SNX11,coding,chr17:43539909-43555104	0.829751
ENSG00000001629.5,ANKIB1,coding,chr7:91713483-91868634	ENSG00000000971.10,CFH,coding,chr1:194887630-194983257	0.829751
ENSG00000001629.5,ANKIB1,coding,chr7:91713483-91868634	ENSG00000002746.8,HECW1,coding,chr7:43118722-43569463	0.829751
ENSG00000001629.5,ANKIB1,coding,chr7:91713483-91868634	ENSG00000001460.12,C1orf201,coding,chr1:24556075-24616011	0.829751
ENSG00000001629.5,ANKIB1,coding,chr7:91713483-91868634	ENSG00000088448.9,ANKRD10,coding,chr13:110328887-110365417	0.829751
ENSG00000001629.5,ANKIB1,coding,chr7:91713483-91868634	ENSG00000005206.9,AC004410.1,coding,chr19:2279628-2306099	0.829751
ENSG00000001631.9,KRIT1,coding,chr7:91666218-91713416	ENSG00000157259.6,GATAD1,coding,chr7:91914702-91926086	0.899135
ENSG00000001631.9,KRIT1,coding,chr7:91666218-91713416	ENSG00000001629.5,ANKIB1,coding,chr7:91713483-91868634	0.899135
ENSG00000001631.9,KRIT1,coding,chr7:91666218-91713416	ENSG00000105793.10,GTPBP10,coding,chr7:89802472-89858705	0.899135
ENSG00000001631.9,KRIT1,coding,chr7:91666218-91713416	ENSG00000004766.11,CCDC132,coding,chr7:92699588-92826274	0.899135
ENSG00000001631.9,KRIT1,coding,chr7:91666218-91713416	ENSG00000005483.13,MLL5,coding,chr7:104441861-104542044	0.899135
ENSG00000001631.9,KRIT1,coding,chr7:91666218-91713416	ENSG00000004864.8,SLC25A13,coding,chr7:95587467-95789395	0.899135
ENSG00000001631.9,KRIT1,coding,chr7:91666218-91713416	ENSG00000101654.11,RNMT,coding,chr18:13716659-13754557	0.899135
ENSG00000001631.9,KRIT1,coding,chr7:91666218-91713416	ENSG00000002016.11,RAD52,coding,chr12:891503-970617	0.899135
ENSG00000001631.9,KRIT1,coding,chr7:91666218-91713416	ENSG00000000457.8,SCYL3,coding,chr1:168088427-168130032	0.899135
ENSG00000001631.9,KRIT1,coding,chr7:91666218-91713416	ENSG00000006634.3,DBF4,coding,chr7:87343466-87376792	0.899135
ENSG00000001631.9,KRIT1,coding,chr7:91666218-91713416	ENSG00000001167.10,NFYA,coding,chr6:41148661-41175693	0.899135
ENSG00000001631.9,KRIT1,coding,chr7:91666218-91713416	ENSG00000074621.8,SLC24A1,coding,chr15:63690768-63734905	0.899135
ENSG00000001631.9,KRIT1,coding,chr7:91666218-91713416	ENSG00000055483.10,USP36,coding,chr17:74304559-74348564	0.899135
ENSG00000001631.9,KRIT1,coding,chr7:91666218-91713416	ENSG00000005379.10,BZRAP1,coding,chr17:53733596-53761151	0.899135
ENSG00000001631.9,KRIT1,coding,chr7:91666218-91713416	ENSG00000001461.11,NIPAL3,coding,chr1:24614870-24672053	0.899135
ENSG00000001631.9,KRIT1,coding,chr7:91666218-91713416	ENSG00000001460.12,C1orf201,coding,chr1:24556075-24616011	0.899135
ENSG00000001631.9,KRIT1,coding,chr7:91666218-91713416	ENSG00000074706.9,IPCEF1,coding,chr6:154517322-154719618	0.899135
ENSG00000001631.9,KRIT1,coding,chr7:91666218-91713416	ENSG00000010165.13,METTL13,coding,chr1:170017410-170049786	0.899135
ENSG00000001631.9,KRIT1,coding,chr7:91666218-91713416	ENSG00000004487.10,KDM1A,coding,chr1:23218527-23282769	0.899135
ENSG00000001631.9,KRIT1,coding,chr7:91666218-91713416	ENSG00000036054.8,TBC1D23,coding,chr3:101462533-101526785	0.899135
ENSG00000001631.9,KRIT1,coding,chr7:91666218-91713416	ENSG00000001497.12,LAS1L,coding,chrX:64649186-64671380	0.899135
ENSG00000001631.9,KRIT1,coding,chr7:91666218-91713416	ENSG00000059378.7,PARP12,coding,chr7:139370012-139409990	0.899135
ENSG00000001631.9,KRIT1,coding,chr7:91666218-91713416	ENSG00000005471.11,ABCB4,coding,chr7:86868948-86947687	0.899135
ENSG00000001631.9,KRIT1,coding,chr7:91666218-91713416	ENSG00000052795.8,FNIP2,coding,chr4:159909739-160048651	0.899135
ENSG00000001631.9,KRIT1,coding,chr7:91666218-91713416	ENSG00000005059.11,CCDC109B,coding,chr4:110700809-110829323	0.899135
ENSG00000001631.9,KRIT1,coding,chr7:91666218-91713416	ENSG00000002834.11,LASP1,coding,chr17:34279781-34331549	0.899135
ENSG00000001631.9,KRIT1,coding,chr7:91666218-91713416	ENSG00000006638.6,TBXA2R,coding,chr19:3545503-3557831	0.899135
ENSG00000001631.9,KRIT1,coding,chr7:91666218-91713416	ENSG00000004059.5,ARF5,coding,chr7:127015634-127018995	0.899135
ENSG00000001631.9,KRIT1,coding,chr7:91666218-91713416	ENSG00000005884.11,ITGA3,coding,chr17:45488330-45522847	0.899135
ENSG00000001631.9,KRIT1,coding,chr7:91666218-91713416	ENSG00000005238.13,FAM214B,coding,chr9:35094108-35105999	0.899135
ENSG00000001631.9,KRIT1,coding,chr7:91666218-91713416	ENSG00000002549.7,LAP3,coding,chr4:17187912-17218693	0.899135
ENSG00000001631.9,KRIT1,coding,chr7:91666218-91713416	ENSG00000002919.9,SNX11,coding,chr17:43539909-43555104	0.899135
ENSG00000002016.11,RAD52,coding,chr12:891503-970617	ENSG00000006831.9,ADIPOR2,coding,chr12:1668000-1768105	0.865092
ENSG00000002016.11,RAD52,coding,chr12:891503-970617	ENSG00000060237.10,WNK1,coding,chr12:732019-890879	0.865092
ENSG00000002016.11,RAD52,coding,chr12:891503-970617	ENSG00000047621.7,C12orf4,coding,chr12:4467154-4517935	0.865092
ENSG00000002016.11,RAD52,coding,chr12:891503-970617	ENSG00000059588.5,TARBP1,coding,chr1:232593681-232681472	0.865092
ENSG00000002016.11,RAD52,coding,chr12:891503-970617	ENSG00000007392.12,LUC7L,coding,chr16:178968-219463	0.865092
ENSG00000002016.11,RAD52,coding,chr12:891503-970617	ENSG00000003756.11,RBM5,coding,chr3:50101344-50131458	0.865092
ENSG00000002016.11,RAD52,coding,chr12:891503-970617	ENSG00000001631.9,KRIT1,coding,chr7:91666218-91713416	0.865092
ENSG00000002016.11,RAD52,coding,chr12:891503-970617	ENSG00000075826.11,SEC31B,coding,chr10:102236388-102279618	0.865092
ENSG00000002016.11,RAD52,coding,chr12:891503-970617	ENSG00000003056.3,M6PR,coding,chr12:8984225-8993818	0.865092
ENSG00000002016.11,RAD52,coding,chr12:891503-970617	ENSG00000004478.5,FKBP4,coding,chr12:2774379-2784837	0.865092
ENSG00000002016.11,RAD52,coding,chr12:891503-970617	ENSG00000073670.7,ADAM11,coding,chr17:40192093-40214740	0.865092
ENSG00000002016.11,RAD52,coding,chr12:891503-970617	ENSG00000101391.14,CDK5RAP1,coding,chr20:31410305-31453028	0.865092
ENSG00000002016.11,RAD52,coding,chr12:891503-970617	ENSG00000000457.8,SCYL3,coding,chr1:168088427-168130032	0.865092
ENSG00000002016.11,RAD52,coding,chr12:891503-970617	ENSG00000001629.5,ANKIB1,coding,chr7:91713483-91868634	0.865092
ENSG00000002016.11,RAD52,coding,chr12:891503-970617	ENSG00000002330.8,BAD,coding,chr11:63793877-63808752	0.865092
ENSG00000002016.11,RAD52,coding,chr12:891503-970617	ENSG00000001167.10,NFYA,coding,chr6:41148661-41175693	0.865092
ENSG00000002016.11,RAD52,coding,chr12:891503-970617	ENSG00000004961.10,HCCS,coding,chrX:11039341-11051119	0.865092
ENSG00000002016.11,RAD52,coding,chr12:891503-970617	ENSG00000001460.12,C1orf201,coding,chr1:24556075-24616011	0.865092
ENSG00000002016.11,RAD52,coding,chr12:891503-970617	ENSG00000004777.10,ARHGAP33,coding,chr19:40958256-40971564	0.865092
ENSG00000002016.11,RAD52,coding,chr12:891503-970617	ENSG00000140043.6,PTGR2,coding,chr14:73388299-73423283	0.865092
ENSG00000002016.11,RAD52,coding,chr12:891503-970617	ENSG00000037757.8,MRI1,coding,chr19:13736336-13746096	0.865092
ENSG00000002016.11,RAD52,coding,chr12:891503-970617	ENSG00000002549.7,LAP3,coding,chr4:17187912-17218693	0.865092
ENSG00000002016.11,RAD52,coding,chr12:891503-970617	ENSG00000067596.4,DHX8,coding,chr17:38916856-38959680	0.865092
ENSG00000002016.11,RAD52,coding,chr12:891503-970617	ENSG00000127831.6,VIL1,coding,chr2:218992058-219026262	0.865092
ENSG00000002016.11,RAD52,coding,chr12:891503-970617	ENSG00000003402.12,CFLAR,coding,chr2:201689071-201737278	0.865092
ENSG00000002016.11,RAD52,coding,chr12:891503-970617	ENSG00000000938.7,FGR,coding,chr1:27811161-27834375	0.865092
ENSG00000002016.11,RAD52,coding,chr12:891503-970617	ENSG00000011347.5,SYT7,coding,chr11:61039360-61105196	0.865092
ENSG00000002016.11,RAD52,coding,chr12:891503-970617	ENSG00000007314.6,SCN4A,coding,chr17:59369645-59404010	0.865092
ENSG00000002016.11,RAD52,coding,chr12:891503-970617	ENSG00000011198.3,ABHD5,coding,chr3:43706608-43750867	0.865092
ENSG00000002016.11,RAD52,coding,chr12:891503-970617	ENSG00000006625.11,GGCT,coding,chr7:30502761-30510985	0.865092
ENSG00000002016.11,RAD52,coding,chr12:891503-970617	ENSG00000008282.3,SYPL1,coding,chr7:105518184-105540258	0.865092
ENSG00000002016.11,RAD52,coding,chr12:891503-970617	ENSG00000100721.6,TCL1A,coding,chr14:95246056-95250286	0.865092
ENSG00000002016.11,RAD52,coding,chr12:891503-970617	ENSG00000007520.3,C16orf42,coding,chr16:1339241-1341913	0.865092
ENSG00000002016.11,RAD52,coding,chr12:891503-970617	ENSG00000001630.10,CYP51A1,coding,chr7:91579400-91610202	0.865092
ENSG00000002016.11,RAD52,coding,chr12:891503-970617	ENSG00000034063.7,UHRF1,coding,chr19:4860509-4913162	0.865092
ENSG00000002016.11,RAD52,coding,chr12:891503-970617	ENSG00000004866.13,ST7,coding,chr7:116380527-116657393	0.865092
ENSG00000002549.7,LAP3,coding,chr4:17187912-17218693	ENSG00000115267.4,IFIH1,coding,chr2:162831834-162883459	0.85319
ENSG00000002549.7,LAP3,coding,chr4:17187912-17218693	ENSG00000004468.6,CD38,coding,chr4:15388995-15460167	0.85319
ENSG00000002549.7,LAP3,coding,chr4:17187912-17218693	ENSG00000010030.9,ETV7,coding,chr6:36430396-36464142	0.85319
ENSG00000002549.7,LAP3,coding,chr4:17187912-17218693	ENSG00000038210.8,PI4K2B,coding,chr4:24771360-24889812	0.85319
ENSG00000002549.7,LAP3,coding,chr4:17187912-17218693	ENSG00000071127.11,WDR1,coding,chr4:9685060-9727671	0.85319
ENSG00000002549.7,LAP3,coding,chr4:17187912-17218693	ENSG00000059378.7,PARP12,coding,chr7:139370012-139409990	0.85319
ENSG00000002549.7,LAP3,coding,chr4:17187912-17218693	ENSG00000005059.11,CCDC109B,coding,chr4:110700809-110829323	0.85319
ENSG00000002549.7,LAP3,coding,chr4:17187912-17218693	ENSG00000013288.4,MAN2B2,coding,chr4:6627802-6675990	0.85319
ENSG00000002549.7,LAP3,coding,chr4:17187912-17218693	ENSG00000012779.5,ALOX5,coding,chr10:45189666-45261567	0.85319
ENSG00000002549.7,LAP3,coding,chr4:17187912-17218693	ENSG00000003402.12,CFLAR,coding,chr2:201689071-201737278	0.85319
ENSG00000002549.7,LAP3,coding,chr4:17187912-17218693	ENSG00000000938.7,FGR,coding,chr1:27811161-27834375	0.85319
ENSG00000002549.7,LAP3,coding,chr4:17187912-17218693	ENSG00000005302.12,MSL3,coding,chrX:11686198-11703791	0.85319
ENSG00000002549.7,LAP3,coding,chr4:17187912-17218693	ENSG00000014824.7,SLC30A9,coding,chr4:41687245-41784308	0.85319
ENSG00000002549.7,LAP3,coding,chr4:17187912-17218693	ENSG00000001497.12,LAS1L,coding,chrX:64649186-64671380	0.85319
ENSG00000002549.7,LAP3,coding,chr4:17187912-17218693	ENSG00000001629.5,ANKIB1,coding,chr7:91713483-91868634	0.85319
ENSG00000002549.7,LAP3,coding,chr4:17187912-17218693	ENSG00000152208.7,GRID2,coding,chr4:93444572-94914730	0.85319
ENSG00000002549.7,LAP3,coding,chr4:17187912-17218693	ENSG00000005075.11,POLR2J,coding,chr7:101900569-101906359	0.85319
ENSG00000002549.7,LAP3,coding,chr4:17187912-17218693	ENSG00000002016.11,RAD52,coding,chr12:891503-970617	0.85319
ENSG00000002549.7,LAP3,coding,chr4:17187912-17218693	ENSG00000048342.10,CC2D2A,coding,chr4:15080586-15212278	0.85319
ENSG00000002549.7,LAP3,coding,chr4:17187912-17218693	ENSG00000000457.8,SCYL3,coding,chr1:168088427-168130032	0.85319
ENSG00000002549.7,LAP3,coding,chr4:17187912-17218693	ENSG00000004848.6,ARX,coding,chrX:24931731-24943986	0.85319
ENSG00000002549.7,LAP3,coding,chr4:17187912-17218693	ENSG00000006659.7,LGALS14,coding,chr19:44886785-44891927	0.85319
ENSG00000002549.7,LAP3,coding,chr4:17187912-17218693	ENSG00000002726.14,ABP1,coding,chr7:150152647-150189525	0.85319
ENSG00000002549.7,LAP3,coding,chr4:17187912-17218693	ENSG00000006453.9,BAIAP2L1.1,coding,chr7:97758898-97868316	0.85319
ENSG00000002549.7,LAP3,coding,chr4:17187912-17218693	ENSG00000006576.11,PHTF2,coding,chr7:77266044-77424754	0.85319
ENSG00000002549.7,LAP3,coding,chr4:17187912-17218693	ENSG00000107338.8,SHB,coding,chr9:37909130-38059210	0.85319
ENSG00000002549.7,LAP3,coding,chr4:17187912-17218693	ENSG00000004478.5,FKBP4,coding,chr12:2774379-2784837	0.85319
ENSG00000002549.7,LAP3,coding,chr4:17187912-17218693	ENSG00000073803.9,MAP3K13,coding,chr3:186483422-186689579	0.85319
ENSG00000002549.7,LAP3,coding,chr4:17187912-17218693	ENSG00000001631.9,KRIT1,coding,chr7:91666218-91713416	0.85319
ENSG00000002549.7,LAP3,coding,chr4:17187912-17218693	ENSG00000002933.3,TMEM176A,coding,chr7:150128423-150133141	0.85319
ENSG00000002549.7,LAP3,coding,chr4:17187912-17218693	ENSG00000049130.7,KITLG,coding,chr12:87410015-87498759	0.85319
ENSG00000002549.7,LAP3,coding,chr4:17187912-17218693	ENSG00000011009.5,LYPLA2,coding,chr1:23990046-23994616	0.85319
ENSG00000002549.7,LAP3,coding,chr4:17187912-17218693	ENSG00000074356.10,C17orf85,coding,chr17:3661208-3696289	0.85319
ENSG00000002822.9,MAD1L1,coding,chr7:1821908-2239404	ENSG00000106263.12,EIF3B,coding,chr7:2360246-2386906	0.837721
ENSG00000002822.9,MAD1L1,coding,chr7:1821908-2239404	ENSG00000106009.11,BRAT1,coding,chr7:2544036-2561887	0.837721
ENSG00000002822.9,MAD1L1,coding,chr7:1821908-2239404	ENSG00000122687.13,FTSJ2,coding,chr7:2240391-2248366	0.837721
ENSG00000002822.9,MAD1L1,coding,chr7:1821908-2239404	ENSG00000106266.4,SNX8,coding,chr7:2257930-2360479	0.837721
ENSG00000002822.9,MAD1L1,coding,chr7:1821908-2239404	ENSG00000011275.13,RNF216,coding,chr7:5626203-5787896	0.837721
ENSG00000002822.9,MAD1L1,coding,chr7:1821908-2239404	ENSG00000086232.7,EIF2AK1,coding,chr7:6028406-6065387	0.837721
ENSG00000002822.9,MAD1L1,coding,chr7:1821908-2239404	ENSG00000105963.7,ADAP1,coding,chr7:904065-961569	0.837721
ENSG00000002822.9,MAD1L1,coding,chr7:1821908-2239404	ENSG00000003147.13,ICA1,coding,chr7:8119338-8268842	0.837721
ENSG00000002822.9,MAD1L1,coding,chr7:1821908-2239404	ENSG00000075624.8,ACTB,coding,chr7:5533307-5569941	0.837721
ENSG00000002822.9,MAD1L1,coding,chr7:1821908-2239404	ENSG00000008256.11,CYTH3,coding,chr7:6167931-6278800	0.837721
ENSG00000002822.9,MAD1L1,coding,chr7:1821908-2239404	ENSG00000006715.11,VPS41,coding,chr7:38729087-38938519	0.837721
ENSG00000002822.9,MAD1L1,coding,chr7:1821908-2239404	ENSG00000004779.4,NDUFAB1,coding,chr16:23499823-23515178	0.837721
ENSG00000002822.9,MAD1L1,coding,chr7:1821908-2239404	ENSG00000005007.7,UPF1,coding,chr19:18803743-18840038	0.837721
ENSG00000002822.9,MAD1L1,coding,chr7:1821908-2239404	ENSG00000012963.8,UBR7,coding,chr14:92743153-92765314	0.837721
ENSG00000002822.9,MAD1L1,coding,chr7:1821908-2239404	ENSG00000000003.9,TSPAN6,coding,chrX:99770322-99781644	0.837721
ENSG00000002822.9,MAD1L1,coding,chr7:1821908-2239404	ENSG00000004897.5,CDC27,coding,chr17:42550067-42621787	0.837721
ENSG00000002822.9,MAD1L1,coding,chr7:1821908-2239404	ENSG00000136932.8,C9orf156,coding,chr9:99706591-99724673	0.837721
ENSG00000002822.9,MAD1L1,coding,chr7:1821908-2239404	ENSG00000049167.8,ERCC8,coding,chr5:60205414-60276657	0.837721
ENSG00000002822.9,MAD1L1,coding,chr7:1821908-2239404	ENSG00000014824.7,SLC30A9,coding,chr4:41687245-41784308	0.837721
ENSG00000002822.9,MAD1L1,coding,chr7:1821908-2239404	ENSG00000006576.11,PHTF2,coding,chr7:77266044-77424754	0.837721
ENSG00000002822.9,MAD1L1,coding,chr7:1821908-2239404	ENSG00000163125.11,RPRD2,coding,chr1:148602190-148715666	0.837721
ENSG00000002822.9,MAD1L1,coding,chr7:1821908-2239404	ENSG00000000419.7,DPM1,coding,chr20:48984810-49008499	0.837721
ENSG00000002822.9,MAD1L1,coding,chr7:1821908-2239404	ENSG00000001617.7,SEMA3F,coding,chr3:50167481-50201512	0.837721
ENSG00000002822.9,MAD1L1,coding,chr7:1821908-2239404	ENSG00000006047.7,YBX2,coding,chr17:7132294-7138600	0.837721
ENSG00000002822.9,MAD1L1,coding,chr7:1821908-2239404	ENSG00000120645.7,IQSEC3,coding,chr12:46191-157887	0.837721
ENSG00000002822.9,MAD1L1,coding,chr7:1821908-2239404	ENSG00000008294.13,SPAG9,coding,chr17:46394533-46553225	0.837721
ENSG00000002822.9,MAD1L1,coding,chr7:1821908-2239404	ENSG00000183128.7,CALHM3,coding,chr10:105222550-105228987	0.837721
ENSG00000002822.9,MAD1L1,coding,chr7:1821908-2239404	ENSG00000011114.10,BTBD7,coding,chr14:92773648-92869191	0.837721
ENSG00000002822.9,MAD1L1,coding,chr7:1821908-2239404	ENSG00000054356.6,PTPRN,coding,chr2:219862588-219882614	0.837721
ENSG00000002834.11,LASP1,coding,chr17:34279781-34331549	ENSG00000108296.4,CWC25,coding,chr17:34210972-34235115	0.881208
ENSG00000002834.11,LASP1,coding,chr17:34279781-34331549	ENSG00000006114.10,SYNRG,coding,chr17:32949012-33043601	0.881208
ENSG00000002834.11,LASP1,coding,chr17:34279781-34331549	ENSG00000008838.11,MED24,coding,chr17:35428875-35464187	0.881208
ENSG00000002834.11,LASP1,coding,chr17:34279781-34331549	ENSG00000056661.8,PCGF2,coding,chr17:34143675-34158084	0.881208
ENSG00000002834.11,LASP1,coding,chr17:34279781-34331549	ENSG00000004139.8,SARM1,coding,chr17:23715504-23752173	0.881208
ENSG00000002834.11,LASP1,coding,chr17:34279781-34331549	ENSG00000005156.5,LIG3,coding,chr17:30331654-30356196	0.881208
ENSG00000002834.11,LASP1,coding,chr17:34279781-34331549	ENSG00000011052.15,NME2,coding,chr17:46585918-46604107	0.881208
ENSG00000002834.11,LASP1,coding,chr17:34279781-34331549	ENSG00000004399.8,PLXND1,coding,chr3:130756707-130808351	0.881208
ENSG00000002834.11,LASP1,coding,chr17:34279781-34331549	ENSG00000005955.7,GGNBP2,coding,chr17:31974885-32020391	0.881208
ENSG00000002834.11,LASP1,coding,chr17:34279781-34331549	ENSG00000126705.7,AHDC1,coding,chr1:27733132-27803529	0.881208
ENSG00000002834.11,LASP1,coding,chr17:34279781-34331549	ENSG00000109436.7,TBC1D9,coding,chr4:141761368-141896724	0.881208
ENSG00000002834.11,LASP1,coding,chr17:34279781-34331549	ENSG00000001167.10,NFYA,coding,chr6:41148661-41175693	0.881208
ENSG00000002834.11,LASP1,coding,chr17:34279781-34331549	ENSG00000117139.10,KDM5B,coding,chr1:200963148-201045221	0.881208
ENSG00000002834.11,LASP1,coding,chr17:34279781-34331549	ENSG00000024422.5,EHD2,coding,chr19:52908412-52938202	0.881208
ENSG00000002834.11,LASP1,coding,chr17:34279781-34331549	ENSG00000051382.4,PIK3CB,coding,chr3:139855549-140036470	0.881208
ENSG00000002834.11,LASP1,coding,chr17:34279781-34331549	ENSG00000114019.10,AMOTL2,coding,chr3:135557405-135577011	0.881208
ENSG00000002834.11,LASP1,coding,chr17:34279781-34331549	ENSG00000003056.3,M6PR,coding,chr12:8984225-8993818	0.881208
ENSG00000002834.11,LASP1,coding,chr17:34279781-34331549	ENSG00000001461.11,NIPAL3,coding,chr1:24614870-24672053	0.881208
ENSG00000002834.11,LASP1,coding,chr17:34279781-34331549	ENSG00000117868.9,ESYT2,coding,chr7:158216446-158315705	0.881208
ENSG00000002834.11,LASP1,coding,chr17:34279781-34331549	ENSG00000104904.4,OAZ1,coding,chr19:2220519-2224487	0.881208
ENSG00000002834.11,LASP1,coding,chr17:34279781-34331549	ENSG00000005059.11,CCDC109B,coding,chr4:110700809-110829323	0.881208
ENSG00000002834.11,LASP1,coding,chr17:34279781-34331549	ENSG00000000457.8,SCYL3,coding,chr1:168088427-168130032	0.881208
ENSG00000002834.11,LASP1,coding,chr17:34279781-34331549	ENSG00000065057.2,NTHL1,coding,chr16:2029816-2037868	0.881208
ENSG00000002834.11,LASP1,coding,chr17:34279781-34331549	ENSG00000003137.4,CYP26B1,coding,chr2:72209874-72228675	0.881208
ENSG00000002834.11,LASP1,coding,chr17:34279781-34331549	ENSG00000000971.10,CFH,coding,chr1:194887630-194983257	0.881208
ENSG00000002834.11,LASP1,coding,chr17:34279781-34331549	ENSG00000006459.6,JHDM1D,coding,chr7:139431014-139523304	0.881208
ENSG00000002834.11,LASP1,coding,chr17:34279781-34331549	ENSG00000130561.11,SAG,coding,chr2:233881047-233920440	0.881208
ENSG00000002834.11,LASP1,coding,chr17:34279781-34331549	ENSG00000006530.10,AGK,coding,chr7:140897457-141001513	0.881208
ENSG00000002834.11,LASP1,coding,chr17:34279781-34331549	ENSG00000005379.10,BZRAP1,coding,chr17:53733596-53761151	0.881208
ENSG00000002834.11,LASP1,coding,chr17:34279781-34331549	ENSG00000143398.14,PIP5K1A,coding,chr1:149437048-149488636	0.881208
ENSG00000002834.11,LASP1,coding,chr17:34279781-34331549	ENSG00000010539.6,ZNF200,coding,chr16:3212325-3225457	0.881208
ENSG00000002834.11,LASP1,coding,chr17:34279781-34331549	ENSG00000108294.3,PSMB3,coding,chr17:34162528-34174009	0.881208
ENSG00000002834.11,LASP1,coding,chr17:34279781-34331549	ENSG00000113966.5,ARL6,coding,chr3:98966054-99002643	0.881208
ENSG00000002834.11,LASP1,coding,chr17:34279781-34331549	ENSG00000076344.11,RGS11,coding,chr16:258300-265981	0.881208
ENSG00000002834.11,LASP1,coding,chr17:34279781-34331549	ENSG00000007520.3,C16orf42,coding,chr16:1339241-1341913	0.881208
ENSG00000002834.11,LASP1,coding,chr17:34279781-34331549	ENSG00000041515.9,MYO16,coding,chr13:108046500-108658356	0.881208
ENSG00000002834.11,LASP1,coding,chr17:34279781-34331549	ENSG00000111057.6,KRT18,coding,chr12:51628921-51632952	0.881208
ENSG00000002834.11,LASP1,coding,chr17:34279781-34331549	ENSG00000072042.8,RDH11,coding,chr14:67213270-67232284	0.881208
ENSG00000002834.11,LASP1,coding,chr17:34279781-34331549	ENSG00000007350.11,TKTL1,coding,chrX:153177217-153211907	0.881208
ENSG00000002933.3,TMEM176A,coding,chr7:150128423-150133141	ENSG00000106565.12,TMEM176B,coding,chr7:150119305-150129383	0.94885
ENSG00000002933.3,TMEM176A,coding,chr7:150128423-150133141	ENSG00000002726.14,ABP1,coding,chr7:150152647-150189525	0.94885
ENSG00000002933.3,TMEM176A,coding,chr7:150128423-150133141	ENSG00000005243.4,COPZ2,coding,chr17:43458533-43470138	0.94885
ENSG00000002933.3,TMEM176A,coding,chr7:150128423-150133141	ENSG00000012779.5,ALOX5,coding,chr10:45189666-45261567	0.94885
ENSG00000002933.3,TMEM176A,coding,chr7:150128423-150133141	ENSG00000074370.12,ATP2A3,coding,chr17:3769617-3814485	0.94885
ENSG00000002933.3,TMEM176A,coding,chr7:150128423-150133141	ENSG00000000938.7,FGR,coding,chr1:27811161-27834375	0.94885
ENSG00000002933.3,TMEM176A,coding,chr7:150128423-150133141	ENSG00000005020.7,SKAP2,coding,chr7:26673205-27001383	0.94885
ENSG00000002933.3,TMEM176A,coding,chr7:150128423-150133141	ENSG00000003436.10,TFPI,coding,chr2:188037201-188138732	0.94885
ENSG00000002933.3,TMEM176A,coding,chr7:150128423-150133141	ENSG00000134028.10,ADAMDEC1,coding,chr8:24297742-24319471	0.94885
ENSG00000002933.3,TMEM176A,coding,chr7:150128423-150133141	ENSG00000000971.10,CFH,coding,chr1:194887630-194983257	0.94885
ENSG00000002933.3,TMEM176A,coding,chr7:150128423-150133141	ENSG00000001460.12,C1orf201,coding,chr1:24556075-24616011	0.94885
ENSG00000002933.3,TMEM176A,coding,chr7:150128423-150133141	ENSG00000008516.10,MMP25,coding,chr16:3036682-3050704	0.94885
ENSG00000002933.3,TMEM176A,coding,chr7:150128423-150133141	ENSG00000001461.11,NIPAL3,coding,chr1:24614870-24672053	0.94885
ENSG00000002933.3,TMEM176A,coding,chr7:150128423-150133141	ENSG00000002919.9,SNX11,coding,chr17:43539909-43555104	0.94885
ENSG00000002933.3,TMEM176A,coding,chr7:150128423-150133141	ENSG00000003393.10,ALS2,coding,chr2:202273521-202354157	0.94885
ENSG00000002933.3,TMEM176A,coding,chr7:150128423-150133141	ENSG00000177201.1,OR2T12,coding,chr1:246524540-246525503	0.94885
ENSG00000002933.3,TMEM176A,coding,chr7:150128423-150133141	ENSG00000088053.7,GP6,coding,chr19:60216884-60241444	0.94885
ENSG00000002933.3,TMEM176A,coding,chr7:150128423-150133141	ENSG00000119953.7,SMNDC1,coding,chr10:112042787-112054699	0.94885
ENSG00000002933.3,TMEM176A,coding,chr7:150128423-150133141	ENSG00000002549.7,LAP3,coding,chr4:17187912-17218693	0.94885
ENSG00000003056.3,M6PR,coding,chr12:8984225-8993818	ENSG00000089818.11,NECAP1,coding,chr12:7817414-8141634	0.89245
ENSG00000003056.3,M6PR,coding,chr12:8984225-8993818	ENSG00000004700.11,RECQL,coding,chr12:21513111-21545870	0.89245
ENSG00000003056.3,M6PR,coding,chr12:8984225-8993818	ENSG00000006831.9,ADIPOR2,coding,chr12:1668000-1768105	0.89245
ENSG00000003056.3,M6PR,coding,chr12:8984225-8993818	ENSG00000111752.5,PHC1,coding,chr12:8957758-8985330	0.89245
ENSG00000003056.3,M6PR,coding,chr12:8984225-8993818	ENSG00000010292.7,NCAPD2,coding,chr12:6472782-6511382	0.89245
ENSG00000003056.3,M6PR,coding,chr12:8984225-8993818	ENSG00000002016.11,RAD52,coding,chr12:891503-970617	0.89245
ENSG00000003056.3,M6PR,coding,chr12:8984225-8993818	ENSG00000092098.10,RNF31,coding,chr14:23685731-23699710	0.89245
ENSG00000003056.3,M6PR,coding,chr12:8984225-8993818	ENSG00000000457.8,SCYL3,coding,chr1:168088427-168130032	0.89245
ENSG00000003056.3,M6PR,coding,chr12:8984225-8993818	ENSG00000006125.11,AP2B1,coding,chr17:30938394-31077547	0.89245
ENSG00000003056.3,M6PR,coding,chr12:8984225-8993818	ENSG00000160783.13,PMF1,coding,chr1:154449407-154479498	0.89245
ENSG00000003056.3,M6PR,coding,chr12:8984225-8993818	ENSG00000004478.5,FKBP4,coding,chr12:2774379-2784837	0.89245
ENSG00000003056.3,M6PR,coding,chr12:8984225-8993818	ENSG00000008323.11,PLEKHG6,coding,chr12:6289862-6307933	0.89245
ENSG00000003056.3,M6PR,coding,chr12:8984225-8993818	ENSG00000001629.5,ANKIB1,coding,chr7:91713483-91868634	0.89245
ENSG00000003056.3,M6PR,coding,chr12:8984225-8993818	ENSG00000005339.6,CREBBP,coding,chr16:3715055-3870723	0.89245
ENSG00000003056.3,M6PR,coding,chr12:8984225-8993818	ENSG00000013288.4,MAN2B2,coding,chr4:6627802-6675990	0.89245
ENSG00000003056.3,M6PR,coding,chr12:8984225-8993818	ENSG00000134590.9,FAM127A,coding,chrX:133993998-133995242	0.89245
ENSG00000003056.3,M6PR,coding,chr12:8984225-8993818	ENSG00000010278.6,CD9,coding,chr12:6179141-6217688	0.89245
ENSG00000003056.3,M6PR,coding,chr12:8984225-8993818	ENSG00000066117.9,SMARCD1,coding,chr12:48765021-48780762	0.89245
ENSG00000003056.3,M6PR,coding,chr12:8984225-8993818	ENSG00000147164.6,SNX12,coding,chrX:70195818-70204998	0.89245
ENSG00000003056.3,M6PR,coding,chr12:8984225-8993818	ENSG00000015676.12,NUDCD3,coding,chr7:44388493-44497004	0.89245
ENSG00000003056.3,M6PR,coding,chr12:8984225-8993818	ENSG00000002919.9,SNX11,coding,chr17:43539909-43555104	0.89245
ENSG00000003056.3,M6PR,coding,chr12:8984225-8993818	ENSG00000002834.11,LASP1,coding,chr17:34279781-34331549	0.89245
ENSG00000003056.3,M6PR,coding,chr12:8984225-8993818	ENSG00000004897.5,CDC27,coding,chr17:42550067-42621787	0.89245
ENSG00000003056.3,M6PR,coding,chr12:8984225-8993818	ENSG00000096433.5,ITPR3,coding,chr6:33696499-33772329	0.89245
ENSG00000003056.3,M6PR,coding,chr12:8984225-8993818	ENSG00000007952.12,NOX1,coding,chrX:99984968-100015990	0.89245
ENSG00000003056.3,M6PR,coding,chr12:8984225-8993818	ENSG00000000003.9,TSPAN6,coding,chrX:99770322-99781644	0.89245
ENSG00000003056.3,M6PR,coding,chr12:8984225-8993818	ENSG00000014164.5,ZC3H3,coding,chr8:144590967-144694766	0.89245
ENSG00000003056.3,M6PR,coding,chr12:8984225-8993818	ENSG00000000938.7,FGR,coding,chr1:27811161-27834375	0.89245
ENSG00000003056.3,M6PR,coding,chr12:8984225-8993818	ENSG00000004777.10,ARHGAP33,coding,chr19:40958256-40971564	0.89245
ENSG00000003056.3,M6PR,coding,chr12:8984225-8993818	ENSG00000005022.5,SLC25A5,coding,chrX:118486390-118489310	0.89245
ENSG00000003056.3,M6PR,coding,chr12:8984225-8993818	ENSG00000077549.11,CAPZB,coding,chr1:19537853-19684653	0.89245
ENSG00000003056.3,M6PR,coding,chr12:8984225-8993818	ENSG00000229821.1,RP11-567E21.3.1,lncRNA,chr1:199457863-199458874	0.89245
ENSG00000003056.3,M6PR,coding,chr12:8984225-8993818	ENSG00000005955.7,GGNBP2,coding,chr17:31974885-32020391	0.89245
ENSG00000003056.3,M6PR,coding,chr12:8984225-8993818	ENSG00000003756.11,RBM5,coding,chr3:50101344-50131458	0.89245
ENSG00000003056.3,M6PR,coding,chr12:8984225-8993818	ENSG00000006555.6,TTC22,coding,chr1:55017972-55039528	0.89245
ENSG00000003056.3,M6PR,coding,chr12:8984225-8993818	ENSG00000004776.5,HSPB6,coding,chr19:40937309-40939770	0.89245
ENSG00000003056.3,M6PR,coding,chr12:8984225-8993818	ENSG00000136274.8,NACAD,coding,chr7:45086561-45095038	0.89245
ENSG00000003056.3,M6PR,coding,chr12:8984225-8993818	ENSG00000087086.7,FTL,coding,chr19:54160377-54161947	0.89245
ENSG00000003056.3,M6PR,coding,chr12:8984225-8993818	ENSG00000004534.9,RBM6,coding,chr3:49952443-50112482	0.89245
ENSG00000003056.3,M6PR,coding,chr12:8984225-8993818	ENSG00000011426.6,ANLN,coding,chr7:36395939-36459925	0.89245
ENSG00000003056.3,M6PR,coding,chr12:8984225-8993818	ENSG00000002745.7,WNT16,coding,chr7:120752656-120768394	0.89245
ENSG00000003056.3,M6PR,coding,chr12:8984225-8993818	ENSG00000232849.1,RP11-632L2.1.1,lncRNA,chr13:92506910-92508180	0.89245
ENSG00000003056.3,M6PR,coding,chr12:8984225-8993818	ENSG00000007402.7,CACNA2D2,coding,chr3:50375236-50516679	0.89245
ENSG00000003393.10,ALS2,coding,chr2:202273521-202354157	ENSG00000077232.10,DNAJC10,coding,chr2:183289243-183361787	0.885099
ENSG00000003393.10,ALS2,coding,chr2:202273521-202354157	ENSG00000036257.8,CUL3,coding,chr2:225043110-225158354	0.885099
ENSG00000003393.10,ALS2,coding,chr2:202273521-202354157	ENSG00000082153.12,BZW1,coding,chr2:201383561-201396814	0.885099
ENSG00000003393.10,ALS2,coding,chr2:202273521-202354157	ENSG00000048991.11,R3HDM1,coding,chr2:136005494-136199310	0.885099
ENSG00000003393.10,ALS2,coding,chr2:202273521-202354157	ENSG00000155755.13,TMEM237,coding,chr2:202193151-202216538	0.885099
ENSG00000003393.10,ALS2,coding,chr2:202273521-202354157	ENSG00000006607.8,FARP2,coding,chr2:241944330-242082929	0.885099
ENSG00000003393.10,ALS2,coding,chr2:202273521-202354157	ENSG00000023228.8,NDUFS1,coding,chr2:206694393-206732572	0.885099
ENSG00000003393.10,ALS2,coding,chr2:202273521-202354157	ENSG00000008405.6,CRY1,coding,chr12:105909271-106011737	0.885099
ENSG00000003393.10,ALS2,coding,chr2:202273521-202354157	ENSG00000001167.10,NFYA,coding,chr6:41148661-41175693	0.885099
ENSG00000003393.10,ALS2,coding,chr2:202273521-202354157	ENSG00000005100.7,DHX33,coding,chr17:5284955-5312960	0.885099
ENSG00000003393.10,ALS2,coding,chr2:202273521-202354157	ENSG00000003756.11,RBM5,coding,chr3:50101344-50131458	0.885099
ENSG00000003393.10,ALS2,coding,chr2:202273521-202354157	ENSG00000013441.10,CLK1,coding,chr2:201425976-201437712	0.885099
ENSG00000003393.10,ALS2,coding,chr2:202273521-202354157	ENSG00000081377.12,CDC14B,coding,chr9:98292343-98421933	0.885099
ENSG00000003393.10,ALS2,coding,chr2:202273521-202354157	ENSG00000001629.5,ANKIB1,coding,chr7:91713483-91868634	0.885099
ENSG00000003393.10,ALS2,coding,chr2:202273521-202354157	ENSG00000000460.11,C1orf112,coding,chr1:167897868-168089845	0.885099
ENSG00000003393.10,ALS2,coding,chr2:202273521-202354157	ENSG00000000457.8,SCYL3,coding,chr1:168088427-168130032	0.885099
ENSG00000003393.10,ALS2,coding,chr2:202273521-202354157	ENSG00000019995.6,ZRANB1,coding,chr10:126620681-126666748	0.885099
ENSG00000003393.10,ALS2,coding,chr2:202273521-202354157	ENSG00000002016.11,RAD52,coding,chr12:891503-970617	0.885099
ENSG00000003393.10,ALS2,coding,chr2:202273521-202354157	ENSG00000006015.12,C19orf60,coding,chr19:18560494-18564146	0.885099
ENSG00000003393.10,ALS2,coding,chr2:202273521-202354157	ENSG00000095397.9,DFNB31,coding,chr9:116204180-116307551	0.885099
ENSG00000003393.10,ALS2,coding,chr2:202273521-202354157	ENSG00000003402.12,CFLAR,coding,chr2:201689071-201737278	0.885099
ENSG00000003393.10,ALS2,coding,chr2:202273521-202354157	ENSG00000004897.5,CDC27,coding,chr17:42550067-42621787	0.885099
ENSG00000003393.10,ALS2,coding,chr2:202273521-202354157	ENSG00000005175.5,RPAP3,coding,chr12:46343336-46386111	0.885099
ENSG00000003393.10,ALS2,coding,chr2:202273521-202354157	ENSG00000001460.12,C1orf201,coding,chr1:24556075-24616011	0.885099
ENSG00000003393.10,ALS2,coding,chr2:202273521-202354157	ENSG00000004975.6,DVL2,coding,chr17:7069383-7078592	0.885099
ENSG00000003393.10,ALS2,coding,chr2:202273521-202354157	ENSG00000003987.9,MTMR7,coding,chr8:17199909-17315408	0.885099
ENSG00000003393.10,ALS2,coding,chr2:202273521-202354157	ENSG00000005206.9,AC004410.1,coding,chr19:2279628-2306099	0.885099
ENSG00000003393.10,ALS2,coding,chr2:202273521-202354157	ENSG00000003400.10,CASP10,coding,chr2:201755848-201802374	0.885099
ENSG00000003393.10,ALS2,coding,chr2:202273521-202354157	ENSG00000026559.8,KCNG1,coding,chr20:49053599-49073073	0.885099
ENSG00000003393.10,ALS2,coding,chr2:202273521-202354157	ENSG00000102753.5,KPNA3,coding,chr13:49171447-49265058	0.885099
ENSG00000003393.10,ALS2,coding,chr2:202273521-202354157	ENSG00000005238.13,FAM214B,coding,chr9:35094108-35105999	0.885099
ENSG00000003393.10,ALS2,coding,chr2:202273521-202354157	ENSG00000004660.9,CAMKK1,coding,chr17:3710357-3743087	0.885099
ENSG00000003393.10,ALS2,coding,chr2:202273521-202354157	ENSG00000002746.8,HECW1,coding,chr7:43118722-43569463	0.885099
ENSG00000003393.10,ALS2,coding,chr2:202273521-202354157	ENSG00000005059.11,CCDC109B,coding,chr4:110700809-110829323	0.885099
ENSG00000003393.10,ALS2,coding,chr2:202273521-202354157	ENSG00000078902.10,TOLLIP,coding,chr11:1252176-1287460	0.885099
ENSG00000003393.10,ALS2,coding,chr2:202273521-202354157	ENSG00000004455.11,AK2,coding,chr1:33246171-33319184	0.885099
ENSG00000003393.10,ALS2,coding,chr2:202273521-202354157	ENSG00000006016.5,CRLF1,coding,chr19:18565036-18578660	0.885099
ENSG00000003393.10,ALS2,coding,chr2:202273521-202354157	ENSG00000060656.14,PTPRU,coding,chr1:29435614-29525912	0.885099
ENSG00000003393.10,ALS2,coding,chr2:202273521-202354157	ENSG00000033011.5,ALG1,coding,chr16:5023703-5075396	0.885099
ENSG00000003393.10,ALS2,coding,chr2:202273521-202354157	ENSG00000007372.14,PAX6,coding,chr11:31762915-31796085	0.885099
ENSG00000003393.10,ALS2,coding,chr2:202273521-202354157	ENSG00000008516.10,MMP25,coding,chr16:3036682-3050704	0.885099
ENSG00000003393.10,ALS2,coding,chr2:202273521-202354157	ENSG00000005844.11,ITGAL,coding,chr16:30391479-30441790	0.885099
ENSG00000003393.10,ALS2,coding,chr2:202273521-202354157	ENSG00000019991.10,HGF,coding,chr7:81166257-81237690	0.885099
ENSG00000003393.10,ALS2,coding,chr2:202273521-202354157	ENSG00000169714.12,CNBP,coding,chr3:130371016-130385455	0.885099
ENSG00000003393.10,ALS2,coding,chr2:202273521-202354157	ENSG00000004468.6,CD38,coding,chr4:15388995-15460167	0.885099
ENSG00000003402.12,CFLAR,coding,chr2:201689071-201737278	ENSG00000234431.2,AC007283.5.1,lncRNA,chr2:201739932-201740514	0.800257
ENSG00000003402.12,CFLAR,coding,chr2:201689071-201737278	ENSG00000155744.4,FAM126B,coding,chr2:201551460-201644639	0.800257
ENSG00000003402.12,CFLAR,coding,chr2:201689071-201737278	ENSG00000003400.10,CASP10,coding,chr2:201755848-201802374	0.800257
ENSG00000003402.12,CFLAR,coding,chr2:201689071-201737278	ENSG00000004468.6,CD38,coding,chr4:15388995-15460167	0.800257
ENSG00000003402.12,CFLAR,coding,chr2:201689071-201737278	ENSG00000013441.10,CLK1,coding,chr2:201425976-201437712	0.800257
ENSG00000003402.12,CFLAR,coding,chr2:201689071-201737278	ENSG00000003393.10,ALS2,coding,chr2:202273521-202354157	0.800257
ENSG00000003402.12,CFLAR,coding,chr2:201689071-201737278	ENSG00000000938.7,FGR,coding,chr1:27811161-27834375	0.800257
ENSG00000003402.12,CFLAR,coding,chr2:201689071-201737278	ENSG00000002549.7,LAP3,coding,chr4:17187912-17218693	0.800257
ENSG00000003402.12,CFLAR,coding,chr2:201689071-201737278	ENSG00000025434.14,NR1H3,coding,chr11:47226426-47246972	0.800257
ENSG00000003402.12,CFLAR,coding,chr2:201689071-201737278	ENSG00000001629.5,ANKIB1,coding,chr7:91713483-91868634	0.800257
ENSG00000003402.12,CFLAR,coding,chr2:201689071-201737278	ENSG00000000457.8,SCYL3,coding,chr1:168088427-168130032	0.800257
ENSG00000003402.12,CFLAR,coding,chr2:201689071-201737278	ENSG00000008516.10,MMP25,coding,chr16:3036682-3050704	0.800257
ENSG00000003402.12,CFLAR,coding,chr2:201689071-201737278	ENSG00000073614.6,KDM5A,coding,chr12:259483-368881	0.800257
ENSG00000003402.12,CFLAR,coding,chr2:201689071-201737278	ENSG00000005448.12,WDR54,coding,chr2:74502312-74506390	0.800257
ENSG00000003402.12,CFLAR,coding,chr2:201689071-201737278	ENSG00000004777.10,ARHGAP33,coding,chr19:40958256-40971564	0.800257
ENSG00000003402.12,CFLAR,coding,chr2:201689071-201737278	ENSG00000085063.10,CD59,coding,chr11:33676382-33714567	0.800257
ENSG00000003402.12,CFLAR,coding,chr2:201689071-201737278	ENSG00000006128.7,TAC1,coding,chr7:97199155-97207720	0.800257
ENSG00000003402.12,CFLAR,coding,chr2:201689071-201737278	ENSG00000004455.11,AK2,coding,chr1:33246171-33319184	0.800257
ENSG00000003402.12,CFLAR,coding,chr2:201689071-201737278	ENSG00000170647.2,TMEM133,coding,chr11:100368020-100369873	0.800257
ENSG00000003402.12,CFLAR,coding,chr2:201689071-201737278	ENSG00000119013.4,NDUFB3,coding,chr2:201644400-201658718	0.800257
ENSG00000003402.12,CFLAR,coding,chr2:201689071-201737278	ENSG00000000003.9,TSPAN6,coding,chrX:99770322-99781644	0.800257
ENSG00000003402.12,CFLAR,coding,chr2:201689071-201737278	ENSG00000032742.12,IFT88,coding,chr13:20038584-20163572	0.800257
ENSG00000003402.12,CFLAR,coding,chr2:201689071-201737278	ENSG00000153006.9,SREK1IP1,coding,chr5:64052093-64100268	0.800257
ENSG00000003402.12,CFLAR,coding,chr2:201689071-201737278	ENSG00000002919.9,SNX11,coding,chr17:43539909-43555104	0.800257
ENSG00000003402.12,CFLAR,coding,chr2:201689071-201737278	ENSG00000002746.8,HECW1,coding,chr7:43118722-43569463	0.800257
ENSG00000003402.12,CFLAR,coding,chr2:201689071-201737278	ENSG00000237266.1,AC010729.3.1,lncRNA,chr2:5868223-5870179	0.800257
ENSG00000003402.12,CFLAR,coding,chr2:201689071-201737278	ENSG00000235477.1,RP11-122G18.5.1,lncRNA,chr1:159604435-159608378	0.800257
ENSG00000003402.12,CFLAR,coding,chr2:201689071-201737278	ENSG00000004487.10,KDM1A,coding,chr1:23218527-23282769	0.800257
ENSG00000003402.12,CFLAR,coding,chr2:201689071-201737278	ENSG00000011275.13,RNF216,coding,chr7:5626203-5787896	0.800257
ENSG00000003509.11,C2orf56,coding,chr2:37312277-37334050	ENSG00000115816.8,CEBPZ,coding,chr2:37282258-37312360	0.801343
ENSG00000003509.11,C2orf56,coding,chr2:37312277-37334050	ENSG00000138050.10,THUMPD2,coding,chr2:39816703-39859911	0.801343
ENSG00000003509.11,C2orf56,coding,chr2:37312277-37334050	ENSG00000011566.8,MAP4K3,coding,chr2:39329910-39517957	0.801343
ENSG00000003509.11,C2orf56,coding,chr2:37312277-37334050	ENSG00000008869.6,HEATR5B,coding,chr2:37049029-37164989	0.801343
ENSG00000003509.11,C2orf56,coding,chr2:37312277-37334050	ENSG00000005436.9,GCFC2,coding,chr2:75732633-75791623	0.801343
ENSG00000003509.11,C2orf56,coding,chr2:37312277-37334050	ENSG00000001167.10,NFYA,coding,chr6:41148661-41175693	0.801343
ENSG00000003509.11,C2orf56,coding,chr2:37312277-37334050	ENSG00000000460.11,C1orf112,coding,chr1:167897868-168089845	0.801343
ENSG00000003509.11,C2orf56,coding,chr2:37312277-37334050	ENSG00000001631.9,KRIT1,coding,chr7:91666218-91713416	0.801343
ENSG00000003509.11,C2orf56,coding,chr2:37312277-37334050	ENSG00000013441.10,CLK1,coding,chr2:201425976-201437712	0.801343
ENSG00000003509.11,C2orf56,coding,chr2:37312277-37334050	ENSG00000004897.5,CDC27,coding,chr17:42550067-42621787	0.801343
ENSG00000003509.11,C2orf56,coding,chr2:37312277-37334050	ENSG00000004534.9,RBM6,coding,chr3:49952443-50112482	0.801343
ENSG00000003509.11,C2orf56,coding,chr2:37312277-37334050	ENSG00000000457.8,SCYL3,coding,chr1:168088427-168130032	0.801343
ENSG00000003509.11,C2orf56,coding,chr2:37312277-37334050	ENSG00000001084.6,GCLC,coding,chr6:53470097-53589727	0.801343
ENSG00000003509.11,C2orf56,coding,chr2:37312277-37334050	ENSG00000010270.9,STARD3NL,coding,chr7:38184348-38236797	0.801343
ENSG00000003509.11,C2orf56,coding,chr2:37312277-37334050	ENSG00000000003.9,TSPAN6,coding,chrX:99770322-99781644	0.801343
ENSG00000003509.11,C2orf56,coding,chr2:37312277-37334050	ENSG00000034693.8,PEX3,coding,chr6:143813610-143853446	0.801343
ENSG00000003509.11,C2orf56,coding,chr2:37312277-37334050	ENSG00000000419.7,DPM1,coding,chr20:48984810-49008499	0.801343
ENSG00000003509.11,C2orf56,coding,chr2:37312277-37334050	ENSG00000003147.13,ICA1,coding,chr7:8119338-8268842	0.801343
ENSG00000003509.11,C2orf56,coding,chr2:37312277-37334050	ENSG00000011332.13,DPF1,coding,chr19:43393485-43412194	0.801343
ENSG00000003509.11,C2orf56,coding,chr2:37312277-37334050	ENSG00000000938.7,FGR,coding,chr1:27811161-27834375	0.801343
ENSG00000003509.11,C2orf56,coding,chr2:37312277-37334050	ENSG00000242185.2,CT45A2,coding,chrX:134693879-134703505	0.801343
ENSG00000003509.11,C2orf56,coding,chr2:37312277-37334050	ENSG00000023330.9,ALAS1,coding,chr3:52207141-52223383	0.801343
ENSG00000003509.11,C2orf56,coding,chr2:37312277-37334050	ENSG00000004399.8,PLXND1,coding,chr3:130756707-130808351	0.801343
ENSG00000003509.11,C2orf56,coding,chr2:37312277-37334050	ENSG00000057704.6,TMCC3,coding,chr12:93485030-93568469	0.801343
ENSG00000003509.11,C2orf56,coding,chr2:37312277-37334050	ENSG00000141485.9,SLC13A5,coding,chr17:6528755-6557464	0.801343
ENSG00000003509.11,C2orf56,coding,chr2:37312277-37334050	ENSG00000088038.13,CNOT3,coding,chr19:59333255-59351231	0.801343
ENSG00000003509.11,C2orf56,coding,chr2:37312277-37334050	ENSG00000010322.10,NISCH,coding,chr3:52464173-52502127	0.801343
ENSG00000003509.11,C2orf56,coding,chr2:37312277-37334050	ENSG00000060237.10,WNK1,coding,chr12:732019-890879	0.801343
ENSG00000003509.11,C2orf56,coding,chr2:37312277-37334050	ENSG00000114541.10,FRMD4B,coding,chr3:69301830-69674424	0.801343
ENSG00000003509.11,C2orf56,coding,chr2:37312277-37334050	ENSG00000013306.10,SLC25A39,coding,chr17:39752518-39757764	0.801343
ENSG00000003509.11,C2orf56,coding,chr2:37312277-37334050	ENSG00000006432.10,MAP3K9,coding,chr14:70258995-70346004	0.801343
ENSG00000003509.11,C2orf56,coding,chr2:37312277-37334050	ENSG00000013288.4,MAN2B2,coding,chr4:6627802-6675990	0.801343
ENSG00000003509.11,C2orf56,coding,chr2:37312277-37334050	ENSG00000005889.10,ZFX,coding,chrX:24077210-24144293	0.801343
ENSG00000003756.11,RBM5,coding,chr3:50101344-50131458	ENSG00000004534.9,RBM6,coding,chr3:49952443-50112482	0.920935
ENSG00000003756.11,RBM5,coding,chr3:50101344-50131458	ENSG00000010322.10,NISCH,coding,chr3:52464173-52502127	0.920935
ENSG00000003756.11,RBM5,coding,chr3:50101344-50131458	ENSG00000009724.12,MASP2,coding,chr1:11009166-11029877	0.920935
ENSG00000003756.11,RBM5,coding,chr3:50101344-50131458	ENSG00000013441.10,CLK1,coding,chr2:201425976-201437712	0.920935
ENSG00000003756.11,RBM5,coding,chr3:50101344-50131458	ENSG00000005379.10,BZRAP1,coding,chr17:53733596-53761151	0.920935
ENSG00000003756.11,RBM5,coding,chr3:50101344-50131458	ENSG00000006607.8,FARP2,coding,chr2:241944330-242082929	0.920935
ENSG00000003756.11,RBM5,coding,chr3:50101344-50131458	ENSG00000003393.10,ALS2,coding,chr2:202273521-202354157	0.920935
ENSG00000003756.11,RBM5,coding,chr3:50101344-50131458	ENSG00000008300.10,CELSR3,coding,chr3:48648905-48675352	0.920935
ENSG00000003756.11,RBM5,coding,chr3:50101344-50131458	ENSG00000002016.11,RAD52,coding,chr12:891503-970617	0.920935
ENSG00000003756.11,RBM5,coding,chr3:50101344-50131458	ENSG00000000457.8,SCYL3,coding,chr1:168088427-168130032	0.920935
ENSG00000003756.11,RBM5,coding,chr3:50101344-50131458	ENSG00000013523.5,ANGEL1,coding,chr14:76323340-76362342	0.920935
ENSG00000003756.11,RBM5,coding,chr3:50101344-50131458	ENSG00000001631.9,KRIT1,coding,chr7:91666218-91713416	0.920935
ENSG00000003756.11,RBM5,coding,chr3:50101344-50131458	ENSG00000004139.8,SARM1,coding,chr17:23715504-23752173	0.920935
ENSG00000003756.11,RBM5,coding,chr3:50101344-50131458	ENSG00000001461.11,NIPAL3,coding,chr1:24614870-24672053	0.920935
ENSG00000003756.11,RBM5,coding,chr3:50101344-50131458	ENSG00000001617.7,SEMA3F,coding,chr3:50167481-50201512	0.920935
ENSG00000003756.11,RBM5,coding,chr3:50101344-50131458	ENSG00000001460.12,C1orf201,coding,chr1:24556075-24616011	0.920935
ENSG00000003756.11,RBM5,coding,chr3:50101344-50131458	ENSG00000214706.6,IFRD2,coding,chr3:50300166-50305353	0.920935
ENSG00000003756.11,RBM5,coding,chr3:50101344-50131458	ENSG00000005812.6,FBXL3,coding,chr13:76464740-76499331	0.920935
ENSG00000003756.11,RBM5,coding,chr3:50101344-50131458	ENSG00000005100.7,DHX33,coding,chr17:5284955-5312960	0.920935
ENSG00000003756.11,RBM5,coding,chr3:50101344-50131458	ENSG00000036257.8,CUL3,coding,chr2:225043110-225158354	0.920935
ENSG00000003756.11,RBM5,coding,chr3:50101344-50131458	ENSG00000250423.2,KIAA1210,coding,chrX:118096625-118168570	0.920935
ENSG00000003756.11,RBM5,coding,chr3:50101344-50131458	ENSG00000006837.6,CDKL3,coding,chr5:133569203-133734637	0.920935
ENSG00000003756.11,RBM5,coding,chr3:50101344-50131458	ENSG00000000419.7,DPM1,coding,chr20:48984810-49008499	0.920935
ENSG00000003756.11,RBM5,coding,chr3:50101344-50131458	ENSG00000001497.12,LAS1L,coding,chrX:64649186-64671380	0.920935
ENSG00000003756.11,RBM5,coding,chr3:50101344-50131458	ENSG00000002745.7,WNT16,coding,chr7:120752656-120768394	0.920935
ENSG00000003756.11,RBM5,coding,chr3:50101344-50131458	ENSG00000076662.4,ICAM3,coding,chr19:10305453-10311345	0.920935
ENSG00000003756.11,RBM5,coding,chr3:50101344-50131458	ENSG00000004809.9,SLC22A16,coding,chr6:110852582-110904537	0.920935
ENSG00000003756.11,RBM5,coding,chr3:50101344-50131458	ENSG00000005156.5,LIG3,coding,chr17:30331654-30356196	0.920935
ENSG00000003756.11,RBM5,coding,chr3:50101344-50131458	ENSG00000055044.5,NOP58,coding,chr2:202838683-202876634	0.920935
ENSG00000003756.11,RBM5,coding,chr3:50101344-50131458	ENSG00000005001.3,PRSS22,coding,chr16:2842728-2848172	0.920935
ENSG00000003756.11,RBM5,coding,chr3:50101344-50131458	ENSG00000007866.13,TEAD3,coding,chr6:35549351-35572839	0.920935
ENSG00000003756.11,RBM5,coding,chr3:50101344-50131458	ENSG00000004478.5,FKBP4,coding,chr12:2774379-2784837	0.920935
ENSG00000003756.11,RBM5,coding,chr3:50101344-50131458	ENSG00000025796.8,SEC63,coding,chr6:108295652-108386175	0.920935
ENSG00000003756.11,RBM5,coding,chr3:50101344-50131458	ENSG00000124535.10,WRNIP1,coding,chr6:2710646-2731926	0.920935
ENSG00000003756.11,RBM5,coding,chr3:50101344-50131458	ENSG00000003056.3,M6PR,coding,chr12:8984225-8993818	0.920935
ENSG00000003756.11,RBM5,coding,chr3:50101344-50131458	ENSG00000010256.6,UQCRC1,coding,chr3:48611438-48623413	0.920935
ENSG00000003756.11,RBM5,coding,chr3:50101344-50131458	ENSG00000002919.9,SNX11,coding,chr17:43539909-43555104	0.920935
ENSG00000003756.11,RBM5,coding,chr3:50101344-50131458	ENSG00000003249.8,DBNDD1,coding,chr16:88598773-88614037	0.920935
ENSG00000003756.11,RBM5,coding,chr3:50101344-50131458	ENSG00000005175.5,RPAP3,coding,chr12:46343336-46386111	0.920935
ENSG00000003756.11,RBM5,coding,chr3:50101344-50131458	ENSG00000005381.5,MPO,coding,chr17:53702215-53713295	0.920935
ENSG00000004059.5,ARF5,coding,chr7:127015634-127018995	ENSG00000005075.11,POLR2J,coding,chr7:101900569-101906359	0.86518
ENSG00000004059.5,ARF5,coding,chr7:127015634-127018995	ENSG00000075142.9,SRI,coding,chr7:87672368-87694244	0.86518
ENSG00000004059.5,ARF5,coding,chr7:127015634-127018995	ENSG00000004779.4,NDUFAB1,coding,chr16:23499823-23515178	0.86518
ENSG00000004059.5,ARF5,coding,chr7:127015634-127018995	ENSG00000004399.8,PLXND1,coding,chr3:130756707-130808351	0.86518
ENSG00000004059.5,ARF5,coding,chr7:127015634-127018995	ENSG00000049541.5,RFC2,coding,chr7:73283764-73306710	0.86518
ENSG00000004059.5,ARF5,coding,chr7:127015634-127018995	ENSG00000091732.11,ZC3HC1,coding,chr7:129445361-129478527	0.86518
ENSG00000004059.5,ARF5,coding,chr7:127015634-127018995	ENSG00000002330.8,BAD,coding,chr11:63793877-63808752	0.86518
ENSG00000004059.5,ARF5,coding,chr7:127015634-127018995	ENSG00000007255.5,TRAPPC6A,coding,chr19:50358026-50373325	0.86518
ENSG00000004059.5,ARF5,coding,chr7:127015634-127018995	ENSG00000143337.11,TOR1AIP1,coding,chr1:178117799-178155035	0.86518
ENSG00000004059.5,ARF5,coding,chr7:127015634-127018995	ENSG00000006015.12,C19orf60,coding,chr19:18560494-18564146	0.86518
ENSG00000004059.5,ARF5,coding,chr7:127015634-127018995	ENSG00000054148.13,PHPT1,coding,chr9:138862996-138865309	0.86518
ENSG00000004059.5,ARF5,coding,chr7:127015634-127018995	ENSG00000004866.13,ST7,coding,chr7:116380527-116657393	0.86518
ENSG00000004059.5,ARF5,coding,chr7:127015634-127018995	ENSG00000004897.5,CDC27,coding,chr17:42550067-42621787	0.86518
ENSG00000004059.5,ARF5,coding,chr7:127015634-127018995	ENSG00000070476.10,ZXDC,coding,chr3:127639133-127677452	0.86518
ENSG00000004059.5,ARF5,coding,chr7:127015634-127018995	ENSG00000010278.6,CD9,coding,chr12:6179141-6217688	0.86518
ENSG00000004059.5,ARF5,coding,chr7:127015634-127018995	ENSG00000006757.7,PNPLA4,coding,chrX:7826287-7855780	0.86518
ENSG00000004059.5,ARF5,coding,chr7:127015634-127018995	ENSG00000124243.11,BCAS4,coding,chr20:48844837-48927121	0.86518
ENSG00000004059.5,ARF5,coding,chr7:127015634-127018995	ENSG00000000419.7,DPM1,coding,chr20:48984810-49008499	0.86518
ENSG00000004059.5,ARF5,coding,chr7:127015634-127018995	ENSG00000000971.10,CFH,coding,chr1:194887630-194983257	0.86518
ENSG00000004059.5,ARF5,coding,chr7:127015634-127018995	ENSG00000011405.8,PIK3C2A,coding,chr11:17055852-17186106	0.86518
ENSG00000004059.5,ARF5,coding,chr7:127015634-127018995	ENSG00000001167.10,NFYA,coding,chr6:41148661-41175693	0.86518
ENSG00000004059.5,ARF5,coding,chr7:127015634-127018995	ENSG00000000457.8,SCYL3,coding,chr1:168088427-168130032	0.86518
ENSG00000004059.5,ARF5,coding,chr7:127015634-127018995	ENSG00000001084.6,GCLC,coding,chr6:53470097-53589727	0.86518
ENSG00000004059.5,ARF5,coding,chr7:127015634-127018995	ENSG00000086589.7,RBM22,coding,chr5:150050548-150060862	0.86518
ENSG00000004059.5,ARF5,coding,chr7:127015634-127018995	ENSG00000005238.13,FAM214B,coding,chr9:35094108-35105999	0.86518
ENSG00000004059.5,ARF5,coding,chr7:127015634-127018995	ENSG00000005961.11,ITGA2B,coding,chr17:39805075-39822399	0.86518
ENSG00000004059.5,ARF5,coding,chr7:127015634-127018995	ENSG00000039139.8,DNAH5,coding,chr5:13743439-13997652	0.86518
ENSG00000004059.5,ARF5,coding,chr7:127015634-127018995	ENSG00000000003.9,TSPAN6,coding,chrX:99770322-99781644	0.86518
ENSG00000004059.5,ARF5,coding,chr7:127015634-127018995	ENSG00000008952.10,SEC62,coding,chr3:171167116-171198855	0.86518
ENSG00000004059.5,ARF5,coding,chr7:127015634-127018995	ENSG00000137404.10,NRM,coding,chr6:30763802-30767176	0.86518
ENSG00000004059.5,ARF5,coding,chr7:127015634-127018995	ENSG00000048405.5,ZNF800,coding,chr7:126774079-126859214	0.86518
ENSG00000004059.5,ARF5,coding,chr7:127015634-127018995	ENSG00000065618.11,COL17A1,coding,chr10:105781033-105835750	0.86518
ENSG00000004059.5,ARF5,coding,chr7:127015634-127018995	ENSG00000117877.5,CD3EAP,coding,chr19:50601306-50605864	0.86518
ENSG00000004059.5,ARF5,coding,chr7:127015634-127018995	ENSG00000004864.8,SLC25A13,coding,chr7:95587467-95789395	0.86518
ENSG00000004059.5,ARF5,coding,chr7:127015634-127018995	ENSG00000013392.5,RWDD2A,coding,chr6:83959816-83963101	0.86518
ENSG00000004059.5,ARF5,coding,chr7:127015634-127018995	ENSG00000076053.6,RBM7,coding,chr11:113775961-113790135	0.86518
ENSG00000004059.5,ARF5,coding,chr7:127015634-127018995	ENSG00000117362.8,APH1A,coding,chr1:148504427-148508604	0.86518
ENSG00000004059.5,ARF5,coding,chr7:127015634-127018995	ENSG00000083099.6,LYRM2,coding,chr6:90334581-90405193	0.86518
ENSG00000004059.5,ARF5,coding,chr7:127015634-127018995	ENSG00000004766.11,CCDC132,coding,chr7:92699588-92826274	0.86518
ENSG00000004059.5,ARF5,coding,chr7:127015634-127018995	ENSG00000004975.6,DVL2,coding,chr17:7069383-7078592	0.86518
ENSG00000004059.5,ARF5,coding,chr7:127015634-127018995	ENSG00000013275.2,PSMC4,coding,chr19:45168912-45179191	0.86518
ENSG00000004059.5,ARF5,coding,chr7:127015634-127018995	ENSG00000001561.5,ENPP4,coding,chr6:46205659-46222394	0.86518
ENSG00000004139.8,SARM1,coding,chr17:23715504-23752173	ENSG00000076351.7,SLC46A1,coding,chr17:23745787-23757355	0.843024
ENSG00000004139.8,SARM1,coding,chr17:23715504-23752173	ENSG00000007202.7,KIAA0100,coding,chr17:23965585-23996599	0.843024
ENSG00000004139.8,SARM1,coding,chr17:23715504-23752173	ENSG00000109079.3,TNFAIP1,coding,chr17:23686856-23698162	0.843024
ENSG00000004139.8,SARM1,coding,chr17:23715504-23752173	ENSG00000002834.11,LASP1,coding,chr17:34279781-34331549	0.843024
ENSG00000004139.8,SARM1,coding,chr17:23715504-23752173	ENSG00000004779.4,NDUFAB1,coding,chr16:23499823-23515178	0.843024
ENSG00000004139.8,SARM1,coding,chr17:23715504-23752173	ENSG00000008441.10,NFIX,coding,chr19:12967583-13070610	0.843024
ENSG00000004139.8,SARM1,coding,chr17:23715504-23752173	ENSG00000003756.11,RBM5,coding,chr3:50101344-50131458	0.843024
ENSG00000004139.8,SARM1,coding,chr17:23715504-23752173	ENSG00000079805.9,DNM2,coding,chr19:10685142-10803586	0.843024
ENSG00000004139.8,SARM1,coding,chr17:23715504-23752173	ENSG00000005379.10,BZRAP1,coding,chr17:53733596-53761151	0.843024
ENSG00000004139.8,SARM1,coding,chr17:23715504-23752173	ENSG00000001461.11,NIPAL3,coding,chr1:24614870-24672053	0.843024
ENSG00000004139.8,SARM1,coding,chr17:23715504-23752173	ENSG00000004660.9,CAMKK1,coding,chr17:3710357-3743087	0.843024
ENSG00000004139.8,SARM1,coding,chr17:23715504-23752173	ENSG00000005156.5,LIG3,coding,chr17:30331654-30356196	0.843024
ENSG00000004139.8,SARM1,coding,chr17:23715504-23752173	ENSG00000049759.11,NEDD4L,coding,chr18:53862616-54219752	0.843024
ENSG00000004139.8,SARM1,coding,chr17:23715504-23752173	ENSG00000007171.11,NOS2,coding,chr17:23107918-23151682	0.843024
ENSG00000004139.8,SARM1,coding,chr17:23715504-23752173	ENSG00000002016.11,RAD52,coding,chr12:891503-970617	0.843024
ENSG00000004139.8,SARM1,coding,chr17:23715504-23752173	ENSG00000008130.10,NADK,coding,chr1:1672530-1701756	0.843024
ENSG00000004139.8,SARM1,coding,chr17:23715504-23752173	ENSG00000056558.6,TRAF1,coding,chr9:122704491-122731272	0.843024
ENSG00000004139.8,SARM1,coding,chr17:23715504-23752173	ENSG00000000457.8,SCYL3,coding,chr1:168088427-168130032	0.843024
ENSG00000004139.8,SARM1,coding,chr17:23715504-23752173	ENSG00000001460.12,C1orf201,coding,chr1:24556075-24616011	0.843024
ENSG00000004139.8,SARM1,coding,chr17:23715504-23752173	ENSG00000223626.1,RP11-315H15.1.1,lncRNA,chr13:112024881-112033540	0.843024
ENSG00000004139.8,SARM1,coding,chr17:23715504-23752173	ENSG00000000419.7,DPM1,coding,chr20:48984810-49008499	0.843024
ENSG00000004139.8,SARM1,coding,chr17:23715504-23752173	ENSG00000012660.9,ELOVL5,coding,chr6:53240154-53321906	0.843024
ENSG00000004139.8,SARM1,coding,chr17:23715504-23752173	ENSG00000007216.9,SLC13A2,coding,chr17:23824437-23848926	0.843024
ENSG00000004139.8,SARM1,coding,chr17:23715504-23752173	ENSG00000152700.8,SAR1B,coding,chr5:133962131-134012860	0.843024
ENSG00000004139.8,SARM1,coding,chr17:23715504-23752173	ENSG00000005955.7,GGNBP2,coding,chr17:31974885-32020391	0.843024
ENSG00000004139.8,SARM1,coding,chr17:23715504-23752173	ENSG00000001497.12,LAS1L,coding,chrX:64649186-64671380	0.843024
ENSG00000004139.8,SARM1,coding,chr17:23715504-23752173	ENSG00000005102.8,MEOX1,coding,chr17:39073281-39094848	0.843024
ENSG00000004139.8,SARM1,coding,chr17:23715504-23752173	ENSG00000074660.10,SCARF1,coding,chr17:1483901-1495792	0.843024
ENSG00000004139.8,SARM1,coding,chr17:23715504-23752173	ENSG00000008083.8,JARID2,coding,chr6:15353712-15630231	0.843024
ENSG00000004139.8,SARM1,coding,chr17:23715504-23752173	ENSG00000070190.8,DAPP1,coding,chr4:100957012-101010334	0.843024
ENSG00000004139.8,SARM1,coding,chr17:23715504-23752173	ENSG00000032219.14,ARID4A,coding,chr14:57834855-57910358	0.843024
ENSG00000004139.8,SARM1,coding,chr17:23715504-23752173	ENSG00000111674.2,ENO2,coding,chr12:6893169-6903122	0.843024
ENSG00000004139.8,SARM1,coding,chr17:23715504-23752173	ENSG00000013561.13,RNF14,coding,chr5:141318076-141350040	0.843024
ENSG00000004139.8,SARM1,coding,chr17:23715504-23752173	ENSG00000005022.5,SLC25A5,coding,chrX:118486390-118489310	0.843024
ENSG00000004139.8,SARM1,coding,chr17:23715504-23752173	ENSG00000089220.3,PEBP1,coding,chr12:117058045-117067772	0.843024
ENSG00000004139.8,SARM1,coding,chr17:23715504-23752173	ENSG00000096696.8,DSP,coding,chr6:7486806-7531949	0.843024
ENSG00000004399.8,PLXND1,coding,chr3:130756707-130808351	ENSG00000031081.5,ARHGAP31,coding,chr3:120495909-120622251	0.82606
ENSG00000004399.8,PLXND1,coding,chr3:130756707-130808351	ENSG00000010327.6,STAB1,coding,chr3:52504393-52533551	0.82606
ENSG00000004399.8,PLXND1,coding,chr3:130756707-130808351	ENSG00000091527.11,CDV3,coding,chr3:134775263-134791795	0.82606
ENSG00000004399.8,PLXND1,coding,chr3:130756707-130808351	ENSG00000134013.10,LOXL2,coding,chr8:23210646-23338786	0.82606
ENSG00000004399.8,PLXND1,coding,chr3:130756707-130808351	ENSG00000004779.4,NDUFAB1,coding,chr16:23499823-23515178	0.82606
ENSG00000004399.8,PLXND1,coding,chr3:130756707-130808351	ENSG00000004059.5,ARF5,coding,chr7:127015634-127018995	0.82606
ENSG00000004399.8,PLXND1,coding,chr3:130756707-130808351	ENSG00000006638.6,TBXA2R,coding,chr19:3545503-3557831	0.82606
ENSG00000004399.8,PLXND1,coding,chr3:130756707-130808351	ENSG00000007545.10,CRAMP1L,coding,chr16:1602326-1667910	0.82606
ENSG00000004399.8,PLXND1,coding,chr3:130756707-130808351	ENSG00000002834.11,LASP1,coding,chr17:34279781-34331549	0.82606
ENSG00000004399.8,PLXND1,coding,chr3:130756707-130808351	ENSG00000000938.7,FGR,coding,chr1:27811161-27834375	0.82606
ENSG00000004399.8,PLXND1,coding,chr3:130756707-130808351	ENSG00000005513.8,SOX8,coding,chr16:971808-976980	0.82606
ENSG00000004399.8,PLXND1,coding,chr3:130756707-130808351	ENSG00000001167.10,NFYA,coding,chr6:41148661-41175693	0.82606
ENSG00000004399.8,PLXND1,coding,chr3:130756707-130808351	ENSG00000005007.7,UPF1,coding,chr19:18803743-18840038	0.82606
ENSG00000004399.8,PLXND1,coding,chr3:130756707-130808351	ENSG00000003137.4,CYP26B1,coding,chr2:72209874-72228675	0.82606
ENSG00000004399.8,PLXND1,coding,chr3:130756707-130808351	ENSG00000006210.6,CX3CL1,coding,chr16:55963870-55976461	0.82606
ENSG00000004399.8,PLXND1,coding,chr3:130756707-130808351	ENSG00000005243.4,COPZ2,coding,chr17:43458533-43470138	0.82606
ENSG00000004399.8,PLXND1,coding,chr3:130756707-130808351	ENSG00000006704.6,GTF2IRD1,coding,chr7:73506055-73654867	0.82606
ENSG00000004399.8,PLXND1,coding,chr3:130756707-130808351	ENSG00000068078.12,FGFR3,coding,chr4:1764831-1780397	0.82606
ENSG00000004399.8,PLXND1,coding,chr3:130756707-130808351	ENSG00000000971.10,CFH,coding,chr1:194887630-194983257	0.82606
ENSG00000004399.8,PLXND1,coding,chr3:130756707-130808351	ENSG00000003393.10,ALS2,coding,chr2:202273521-202354157	0.82606
ENSG00000004399.8,PLXND1,coding,chr3:130756707-130808351	ENSG00000103187.5,COTL1,coding,chr16:83156700-83209184	0.82606
ENSG00000004399.8,PLXND1,coding,chr3:130756707-130808351	ENSG00000001630.10,CYP51A1,coding,chr7:91579400-91610202	0.82606
ENSG00000004399.8,PLXND1,coding,chr3:130756707-130808351	ENSG00000129071.5,MBD4,coding,chr3:130632476-130641568	0.82606
ENSG00000004399.8,PLXND1,coding,chr3:130756707-130808351	ENSG00000000457.8,SCYL3,coding,chr1:168088427-168130032	0.82606
ENSG00000004399.8,PLXND1,coding,chr3:130756707-130808351	ENSG00000001617.7,SEMA3F,coding,chr3:50167481-50201512	0.82606
ENSG00000004399.8,PLXND1,coding,chr3:130756707-130808351	ENSG00000034533.6,ASTE1,coding,chr3:132215408-132229183	0.82606
ENSG00000004399.8,PLXND1,coding,chr3:130756707-130808351	ENSG00000000419.7,DPM1,coding,chr20:48984810-49008499	0.82606
ENSG00000004399.8,PLXND1,coding,chr3:130756707-130808351	ENSG00000002726.14,ABP1,coding,chr7:150152647-150189525	0.82606
ENSG00000004399.8,PLXND1,coding,chr3:130756707-130808351	ENSG00000118473.14,SGIP1,coding,chr1:66771653-66986570	0.82606
ENSG00000004399.8,PLXND1,coding,chr3:130756707-130808351	ENSG00000001084.6,GCLC,coding,chr6:53470097-53589727	0.82606
ENSG00000004399.8,PLXND1,coding,chr3:130756707-130808351	ENSG00000003147.13,ICA1,coding,chr7:8119338-8268842	0.82606
ENSG00000004399.8,PLXND1,coding,chr3:130756707-130808351	ENSG00000042493.10,CAPG,coding,chr2:85474856-85499066	0.82606
ENSG00000004399.8,PLXND1,coding,chr3:130756707-130808351	ENSG00000002549.7,LAP3,coding,chr4:17187912-17218693	0.82606
ENSG00000004399.8,PLXND1,coding,chr3:130756707-130808351	ENSG00000106772.11,PRUNE2,coding,chr9:78416111-78710823	0.82606
ENSG00000004399.8,PLXND1,coding,chr3:130756707-130808351	ENSG00000005486.10,RHBDD2,coding,chr7:75309855-75356180	0.82606
ENSG00000004399.8,PLXND1,coding,chr3:130756707-130808351	ENSG00000074966.6,TXK,coding,chr4:47763166-47831030	0.82606
ENSG00000004399.8,PLXND1,coding,chr3:130756707-130808351	ENSG00000006007.7,GDE1,coding,chr16:19420515-19440968	0.82606
ENSG00000004455.11,AK2,coding,chr1:33246171-33319184	ENSG00000084623.7,EIF3I,coding,chr1:32460115-32469792	0.848144
ENSG00000004455.11,AK2,coding,chr1:33246171-33319184	ENSG00000134684.6,YARS,coding,chr1:33013426-33056341	0.848144
ENSG00000004455.11,AK2,coding,chr1:33246171-33319184	ENSG00000116514.11,RNF19B,coding,chr1:33174632-33202873	0.848144
ENSG00000004455.11,AK2,coding,chr1:33246171-33319184	ENSG00000060688.8,SNRNP40,coding,chr1:31505003-31542249	0.848144
ENSG00000004455.11,AK2,coding,chr1:33246171-33319184	ENSG00000025800.8,KPNA6,coding,chr1:32346225-32414756	0.848144
ENSG00000004455.11,AK2,coding,chr1:33246171-33319184	ENSG00000116497.13,S100PBP,coding,chr1:33054954-33097063	0.848144
ENSG00000004455.11,AK2,coding,chr1:33246171-33319184	ENSG00000009780.10,FAM76A,coding,chr1:27925076-27961062	0.848144
ENSG00000004455.11,AK2,coding,chr1:33246171-33319184	ENSG00000030110.7,BAK1,coding,chr6:33648301-33656048	0.848144
ENSG00000004455.11,AK2,coding,chr1:33246171-33319184	ENSG00000004779.4,NDUFAB1,coding,chr16:23499823-23515178	0.848144
ENSG00000004455.11,AK2,coding,chr1:33246171-33319184	ENSG00000071564.8,TCF3,coding,chr19:1560292-1603326	0.848144
ENSG00000004455.11,AK2,coding,chr1:33246171-33319184	ENSG00000006652.8,IFRD1,coding,chr7:111850258-111908308	0.848144
ENSG00000004455.11,AK2,coding,chr1:33246171-33319184	ENSG00000006016.5,CRLF1,coding,chr19:18565036-18578660	0.848144
ENSG00000004455.11,AK2,coding,chr1:33246171-33319184	ENSG00000003137.4,CYP26B1,coding,chr2:72209874-72228675	0.848144
ENSG00000004455.11,AK2,coding,chr1:33246171-33319184	ENSG00000077348.3,EXOSC5,coding,chr19:46584120-46595096	0.848144
ENSG00000004455.11,AK2,coding,chr1:33246171-33319184	ENSG00000014641.13,MDH1,coding,chr2:63669246-63687835	0.848144
ENSG00000004455.11,AK2,coding,chr1:33246171-33319184	ENSG00000002549.7,LAP3,coding,chr4:17187912-17218693	0.848144
ENSG00000004455.11,AK2,coding,chr1:33246171-33319184	ENSG00000070047.6,PHRF1,coding,chr11:566485-602222	0.848144
ENSG00000004455.11,AK2,coding,chr1:33246171-33319184	ENSG00000038219.8,BOD1L,coding,chr4:13179459-13238445	0.848144
ENSG00000004455.11,AK2,coding,chr1:33246171-33319184	ENSG00000005884.11,ITGA3,coding,chr17:45488330-45522847	0.848144
ENSG00000004455.11,AK2,coding,chr1:33246171-33319184	ENSG00000018280.12,SLC11A1,coding,chr2:218954995-218969861	0.848144
ENSG00000004455.11,AK2,coding,chr1:33246171-33319184	ENSG00000001617.7,SEMA3F,coding,chr3:50167481-50201512	0.848144
ENSG00000004455.11,AK2,coding,chr1:33246171-33319184	ENSG00000013619.8,MAMLD1,coding,chrX:149280346-149433106	0.848144
ENSG00000004455.11,AK2,coding,chr1:33246171-33319184	ENSG00000000419.7,DPM1,coding,chr20:48984810-49008499	0.848144
ENSG00000004455.11,AK2,coding,chr1:33246171-33319184	ENSG00000020129.10,NCDN,coding,chr1:35795660-35805462	0.848144
ENSG00000004455.11,AK2,coding,chr1:33246171-33319184	ENSG00000138795.5,LEF1,coding,chr4:109188149-109309561	0.848144
ENSG00000004455.11,AK2,coding,chr1:33246171-33319184	ENSG00000004059.5,ARF5,coding,chr7:127015634-127018995	0.848144
ENSG00000004455.11,AK2,coding,chr1:33246171-33319184	ENSG00000003402.12,CFLAR,coding,chr2:201689071-201737278	0.848144
ENSG00000004455.11,AK2,coding,chr1:33246171-33319184	ENSG00000004139.8,SARM1,coding,chr17:23715504-23752173	0.848144
ENSG00000004455.11,AK2,coding,chr1:33246171-33319184	ENSG00000060237.10,WNK1,coding,chr12:732019-890879	0.848144
ENSG00000004455.11,AK2,coding,chr1:33246171-33319184	ENSG00000007001.7,UPP2,coding,chr2:158559936-158700724	0.848144
ENSG00000004455.11,AK2,coding,chr1:33246171-33319184	ENSG00000050767.11,COL23A1,coding,chr5:177597224-177950162	0.848144
ENSG00000004455.11,AK2,coding,chr1:33246171-33319184	ENSG00000001630.10,CYP51A1,coding,chr7:91579400-91610202	0.848144
ENSG00000004455.11,AK2,coding,chr1:33246171-33319184	ENSG00000002016.11,RAD52,coding,chr12:891503-970617	0.848144
ENSG00000004455.11,AK2,coding,chr1:33246171-33319184	ENSG00000006715.11,VPS41,coding,chr7:38729087-38938519	0.848144
ENSG00000004455.11,AK2,coding,chr1:33246171-33319184	ENSG00000001167.10,NFYA,coding,chr6:41148661-41175693	0.848144
ENSG00000004455.11,AK2,coding,chr1:33246171-33319184	ENSG00000104643.5,MTMR9,coding,chr8:11179334-11223056	0.848144
ENSG00000004455.11,AK2,coding,chr1:33246171-33319184	ENSG00000001461.11,NIPAL3,coding,chr1:24614870-24672053	0.848144
ENSG00000004455.11,AK2,coding,chr1:33246171-33319184	ENSG00000079257.3,LXN,coding,chr3:159846304-159873176	0.848144
ENSG00000004455.11,AK2,coding,chr1:33246171-33319184	ENSG00000064607.11,SUGP2,coding,chr19:18962696-19005380	0.848144
ENSG00000004455.11,AK2,coding,chr1:33246171-33319184	ENSG00000000938.7,FGR,coding,chr1:27811161-27834375	0.848144
ENSG00000004455.11,AK2,coding,chr1:33246171-33319184	ENSG00000003509.11,C2orf56,coding,chr2:37312277-37334050	0.848144
ENSG00000004455.11,AK2,coding,chr1:33246171-33319184	ENSG00000001460.12,C1orf201,coding,chr1:24556075-24616011	0.848144
ENSG00000004455.11,AK2,coding,chr1:33246171-33319184	ENSG00000003249.8,DBNDD1,coding,chr16:88598773-88614037	0.848144
ENSG00000004455.11,AK2,coding,chr1:33246171-33319184	ENSG00000128645.10,HOXD1,coding,chr2:176761552-176763934	0.848144
ENSG00000004455.11,AK2,coding,chr1:33246171-33319184	ENSG00000049883.9,PTCD2,coding,chr5:71651949-71691808	0.848144
ENSG00000004468.6,CD38,coding,chr4:15388995-15460167	ENSG00000079263.11,SP140,coding,chr2:230798687-230932006	0.847693
ENSG00000004468.6,CD38,coding,chr4:15388995-15460167	ENSG00000026751.11,SLAMF7,coding,chr1:158975660-158991235	0.847693
ENSG00000004468.6,CD38,coding,chr4:15388995-15460167	ENSG00000005844.11,ITGAL,coding,chr16:30391479-30441790	0.847693
ENSG00000004468.6,CD38,coding,chr4:15388995-15460167	ENSG00000002549.7,LAP3,coding,chr4:17187912-17218693	0.847693
ENSG00000004468.6,CD38,coding,chr4:15388995-15460167	ENSG00000068079.3,IFI35,coding,chr17:38412267-38419999	0.847693
ENSG00000004468.6,CD38,coding,chr4:15388995-15460167	ENSG00000000938.7,FGR,coding,chr1:27811161-27834375	0.847693
ENSG00000004468.6,CD38,coding,chr4:15388995-15460167	ENSG00000003402.12,CFLAR,coding,chr2:201689071-201737278	0.847693
ENSG00000004468.6,CD38,coding,chr4:15388995-15460167	ENSG00000105501.6,SIGLEC5,coding,chr19:56806592-56841963	0.847693
ENSG00000004468.6,CD38,coding,chr4:15388995-15460167	ENSG00000010327.6,STAB1,coding,chr3:52504393-52533551	0.847693
ENSG00000004468.6,CD38,coding,chr4:15388995-15460167	ENSG00000007312.7,CD79B,coding,chr17:59359831-59363446	0.847693
ENSG00000004468.6,CD38,coding,chr4:15388995-15460167	ENSG00000006074.3,CCL18,coding,chr17:31415752-31423505	0.847693
ENSG00000004468.6,CD38,coding,chr4:15388995-15460167	ENSG00000012660.9,ELOVL5,coding,chr6:53240154-53321906	0.847693
ENSG00000004468.6,CD38,coding,chr4:15388995-15460167	ENSG00000002933.3,TMEM176A,coding,chr7:150128423-150133141	0.847693
ENSG00000004468.6,CD38,coding,chr4:15388995-15460167	ENSG00000001036.8,FUCA2,coding,chr6:143858306-143874520	0.847693
ENSG00000004468.6,CD38,coding,chr4:15388995-15460167	ENSG00000007350.11,TKTL1,coding,chrX:153177217-153211907	0.847693
ENSG00000004468.6,CD38,coding,chr4:15388995-15460167	ENSG00000002016.11,RAD52,coding,chr12:891503-970617	0.847693
ENSG00000004468.6,CD38,coding,chr4:15388995-15460167	ENSG00000000460.11,C1orf112,coding,chr1:167897868-168089845	0.847693
ENSG00000004468.6,CD38,coding,chr4:15388995-15460167	ENSG00000070018.4,LRP6,coding,chr12:12160225-12311213	0.847693
ENSG00000004468.6,CD38,coding,chr4:15388995-15460167	ENSG00000043355.5,ZIC2,coding,chr13:99432026-99437019	0.847693
ENSG00000004468.6,CD38,coding,chr4:15388995-15460167	ENSG00000036828.9,CASR,coding,chr3:123385219-123488032	0.847693
ENSG00000004468.6,CD38,coding,chr4:15388995-15460167	ENSG00000007237.10,GAS7,coding,chr17:9754650-10042593	0.847693
ENSG00000004468.6,CD38,coding,chr4:15388995-15460167	ENSG00000004660.9,CAMKK1,coding,chr17:3710357-3743087	0.847693
ENSG00000004468.6,CD38,coding,chr4:15388995-15460167	ENSG00000008869.6,HEATR5B,coding,chr2:37049029-37164989	0.847693
ENSG00000004468.6,CD38,coding,chr4:15388995-15460167	ENSG00000006468.9,ETV1,coding,chr7:13897377-13997575	0.847693
ENSG00000004468.6,CD38,coding,chr4:15388995-15460167	ENSG00000004975.6,DVL2,coding,chr17:7069383-7078592	0.847693
ENSG00000004478.5,FKBP4,coding,chr12:2774379-2784837	ENSG00000006831.9,ADIPOR2,coding,chr12:1668000-1768105	0.87043
ENSG00000004478.5,FKBP4,coding,chr12:2774379-2784837	ENSG00000078246.10,TULP3,coding,chr12:2856649-2920567	0.87043
ENSG00000004478.5,FKBP4,coding,chr12:2774379-2784837	ENSG00000013583.4,HEBP1,coding,chr12:13019064-13044474	0.87043
ENSG00000004478.5,FKBP4,coding,chr12:2774379-2784837	ENSG00000010626.10,LRRC23,coding,chr12:6852993-6893668	0.87043
ENSG00000004478.5,FKBP4,coding,chr12:2774379-2784837	ENSG00000002016.11,RAD52,coding,chr12:891503-970617	0.87043
ENSG00000004478.5,FKBP4,coding,chr12:2774379-2784837	ENSG00000003056.3,M6PR,coding,chr12:8984225-8993818	0.87043
ENSG00000004478.5,FKBP4,coding,chr12:2774379-2784837	ENSG00000000938.7,FGR,coding,chr1:27811161-27834375	0.87043
ENSG00000004478.5,FKBP4,coding,chr12:2774379-2784837	ENSG00000081087.10,OSTM1,coding,chr6:108469305-108593751	0.87043
ENSG00000004478.5,FKBP4,coding,chr12:2774379-2784837	ENSG00000080824.13,HSP90AA1,coding,chr14:101616858-101675789	0.87043
ENSG00000004478.5,FKBP4,coding,chr12:2774379-2784837	ENSG00000120694.13,HSPH1,coding,chr13:30608761-30634525	0.87043
ENSG00000004478.5,FKBP4,coding,chr12:2774379-2784837	ENSG00000003400.10,CASP10,coding,chr2:201755848-201802374	0.87043
ENSG00000004478.5,FKBP4,coding,chr12:2774379-2784837	ENSG00000058085.9,LAMC2,coding,chr1:181421995-181480658	0.87043
ENSG00000004478.5,FKBP4,coding,chr12:2774379-2784837	ENSG00000006625.11,GGCT,coding,chr7:30502761-30510985	0.87043
ENSG00000004478.5,FKBP4,coding,chr12:2774379-2784837	ENSG00000005812.6,FBXL3,coding,chr13:76464740-76499331	0.87043
ENSG00000004478.5,FKBP4,coding,chr12:2774379-2784837	ENSG00000000003.9,TSPAN6,coding,chrX:99770322-99781644	0.87043
ENSG00000004478.5,FKBP4,coding,chr12:2774379-2784837	ENSG00000004059.5,ARF5,coding,chr7:127015634-127018995	0.87043
ENSG00000004478.5,FKBP4,coding,chr12:2774379-2784837	ENSG00000010704.13,HFE,coding,chr6:26195487-26206550	0.87043
ENSG00000004478.5,FKBP4,coding,chr12:2774379-2784837	ENSG00000031003.6,FAM13B,coding,chr5:137301547-137415549	0.87043
ENSG00000004478.5,FKBP4,coding,chr12:2774379-2784837	ENSG00000054654.10,SYNE2,coding,chr14:63389435-63762918	0.87043
ENSG00000004478.5,FKBP4,coding,chr12:2774379-2784837	ENSG00000072062.7,PRKACA,coding,chr19:14063508-14089574	0.87043
ENSG00000004478.5,FKBP4,coding,chr12:2774379-2784837	ENSG00000003756.11,RBM5,coding,chr3:50101344-50131458	0.87043
ENSG00000004478.5,FKBP4,coding,chr12:2774379-2784837	ENSG00000004139.8,SARM1,coding,chr17:23715504-23752173	0.87043
ENSG00000004478.5,FKBP4,coding,chr12:2774379-2784837	ENSG00000120697.4,ALG5,coding,chr13:36421911-36472398	0.87043
ENSG00000004478.5,FKBP4,coding,chr12:2774379-2784837	ENSG00000076043.5,REXO2,coding,chr11:113815317-113826211	0.87043
ENSG00000004478.5,FKBP4,coding,chr12:2774379-2784837	ENSG00000005483.13,MLL5,coding,chr7:104441861-104542044	0.87043
ENSG00000004478.5,FKBP4,coding,chr12:2774379-2784837	ENSG00000146083.7,RNF44,coding,chr5:175886303-175897632	0.87043
ENSG00000004478.5,FKBP4,coding,chr12:2774379-2784837	ENSG00000100360.10,IFT27,coding,chr22:35484191-35502246	0.87043
ENSG00000004478.5,FKBP4,coding,chr12:2774379-2784837	ENSG00000003393.10,ALS2,coding,chr2:202273521-202354157	0.87043
ENSG00000004478.5,FKBP4,coding,chr12:2774379-2784837	ENSG00000005882.6,PDK2,coding,chr17:45527099-45544515	0.87043
ENSG00000004478.5,FKBP4,coding,chr12:2774379-2784837	ENSG00000038274.10,MAT2B,coding,chr5:162862697-162878920	0.87043
ENSG00000004478.5,FKBP4,coding,chr12:2774379-2784837	ENSG00000105063.12,PPP6R1,coding,chr19:60432959-60462175	0.87043
ENSG00000004478.5,FKBP4,coding,chr12:2774379-2784837	ENSG00000004534.9,RBM6,coding,chr3:49952443-50112482	0.87043
ENSG00000004478.5,FKBP4,coding,chr12:2774379-2784837	ENSG00000140153.12,WDR20,coding,chr14:101675592-101760937	0.87043
ENSG00000004478.5,FKBP4,coding,chr12:2774379-2784837	ENSG00000102003.6,SYP,coding,chrX:48931212-48943662	0.87043
ENSG00000004478.5,FKBP4,coding,chr12:2774379-2784837	ENSG00000011426.6,ANLN,coding,chr7:36395939-36459925	0.87043
ENSG00000004478.5,FKBP4,coding,chr12:2774379-2784837	ENSG00000090061.12,CCNK,coding,chr14:99017258-99071134	0.87043
ENSG00000004478.5,FKBP4,coding,chr12:2774379-2784837	ENSG00000004961.10,HCCS,coding,chrX:11039341-11051119	0.87043
ENSG00000004478.5,FKBP4,coding,chr12:2774379-2784837	ENSG00000055483.10,USP36,coding,chr17:74304559-74348564	0.87043
ENSG00000004478.5,FKBP4,coding,chr12:2774379-2784837	ENSG00000005469.7,CROT,coding,chr7:86812932-86867047	0.87043
ENSG00000004487.10,KDM1A,coding,chr1:23218527-23282769	ENSG00000011007.7,TCEB3,coding,chr1:23942231-23961136	0.896638
ENSG00000004487.10,KDM1A,coding,chr1:23218527-23282769	ENSG00000075151.13,EIF4G3,coding,chr1:21005558-21375964	0.896638
ENSG00000004487.10,KDM1A,coding,chr1:23218527-23282769	ENSG00000125944.12,HNRNPR,coding,chr1:23502850-23543416	0.896638
ENSG00000004487.10,KDM1A,coding,chr1:23218527-23282769	ENSG00000007923.11,DNAJC11,coding,chr1:6616814-6684571	0.896638
ENSG00000004487.10,KDM1A,coding,chr1:23218527-23282769	ENSG00000011009.5,LYPLA2,coding,chr1:23990046-23994616	0.896638
ENSG00000004487.10,KDM1A,coding,chr1:23218527-23282769	ENSG00000001460.12,C1orf201,coding,chr1:24556075-24616011	0.896638
ENSG00000004487.10,KDM1A,coding,chr1:23218527-23282769	ENSG00000007968.6,E2F2,coding,chr1:23705508-23730299	0.896638
ENSG00000004487.10,KDM1A,coding,chr1:23218527-23282769	ENSG00000005156.5,LIG3,coding,chr17:30331654-30356196	0.896638
ENSG00000004487.10,KDM1A,coding,chr1:23218527-23282769	ENSG00000004864.8,SLC25A13,coding,chr7:95587467-95789395	0.896638
ENSG00000004487.10,KDM1A,coding,chr1:23218527-23282769	ENSG00000004975.6,DVL2,coding,chr17:7069383-7078592	0.896638
ENSG00000004487.10,KDM1A,coding,chr1:23218527-23282769	ENSG00000000460.11,C1orf112,coding,chr1:167897868-168089845	0.896638
ENSG00000004487.10,KDM1A,coding,chr1:23218527-23282769	ENSG00000070831.11,CDC42,coding,chr1:22251706-22292024	0.896638
ENSG00000004487.10,KDM1A,coding,chr1:23218527-23282769	ENSG00000001461.11,NIPAL3,coding,chr1:24614870-24672053	0.896638
ENSG00000004487.10,KDM1A,coding,chr1:23218527-23282769	ENSG00000073464.7,CLCN4,coding,chrX:10085023-10165700	0.896638
ENSG00000004487.10,KDM1A,coding,chr1:23218527-23282769	ENSG00000035499.8,DEPDC1B,coding,chr5:59928495-60031774	0.896638
ENSG00000004487.10,KDM1A,coding,chr1:23218527-23282769	ENSG00000001167.10,NFYA,coding,chr6:41148661-41175693	0.896638
ENSG00000004487.10,KDM1A,coding,chr1:23218527-23282769	ENSG00000010322.10,NISCH,coding,chr3:52464173-52502127	0.896638
ENSG00000004487.10,KDM1A,coding,chr1:23218527-23282769	ENSG00000000457.8,SCYL3,coding,chr1:168088427-168130032	0.896638
ENSG00000004487.10,KDM1A,coding,chr1:23218527-23282769	ENSG00000005448.12,WDR54,coding,chr2:74502312-74506390	0.896638
ENSG00000004487.10,KDM1A,coding,chr1:23218527-23282769	ENSG00000229938.1,MYO16-AS2,lncRNA,chr13:108551609-108552268	0.896638
ENSG00000004487.10,KDM1A,coding,chr1:23218527-23282769	ENSG00000005243.4,COPZ2,coding,chr17:43458533-43470138	0.896638
ENSG00000004487.10,KDM1A,coding,chr1:23218527-23282769	ENSG00000026559.8,KCNG1,coding,chr20:49053599-49073073	0.896638
ENSG00000004487.10,KDM1A,coding,chr1:23218527-23282769	ENSG00000002834.11,LASP1,coding,chr17:34279781-34331549	0.896638
ENSG00000004487.10,KDM1A,coding,chr1:23218527-23282769	ENSG00000003056.3,M6PR,coding,chr12:8984225-8993818	0.896638
ENSG00000004487.10,KDM1A,coding,chr1:23218527-23282769	ENSG00000007255.5,TRAPPC6A,coding,chr19:50358026-50373325	0.896638
ENSG00000004487.10,KDM1A,coding,chr1:23218527-23282769	ENSG00000000971.10,CFH,coding,chr1:194887630-194983257	0.896638
ENSG00000004487.10,KDM1A,coding,chr1:23218527-23282769	ENSG00000008283.10,CYB561,coding,chr17:58863399-58877454	0.896638
ENSG00000004487.10,KDM1A,coding,chr1:23218527-23282769	ENSG00000002330.8,BAD,coding,chr11:63793877-63808752	0.896638
ENSG00000004487.10,KDM1A,coding,chr1:23218527-23282769	ENSG00000004776.5,HSPB6,coding,chr19:40937309-40939770	0.896638
ENSG00000004487.10,KDM1A,coding,chr1:23218527-23282769	ENSG00000003137.4,CYP26B1,coding,chr2:72209874-72228675	0.896638
ENSG00000004487.10,KDM1A,coding,chr1:23218527-23282769	ENSG00000000003.9,TSPAN6,coding,chrX:99770322-99781644	0.896638
ENSG00000004487.10,KDM1A,coding,chr1:23218527-23282769	ENSG00000000938.7,FGR,coding,chr1:27811161-27834375	0.896638
ENSG00000004487.10,KDM1A,coding,chr1:23218527-23282769	ENSG00000004838.9,ZMYND10,coding,chr3:50353544-50359287	0.896638
ENSG00000004487.10,KDM1A,coding,chr1:23218527-23282769	ENSG00000105146.7,AURKC,coding,chr19:62434188-62438727	0.896638
ENSG00000004487.10,KDM1A,coding,chr1:23218527-23282769	ENSG00000056558.6,TRAF1,coding,chr9:122704491-122731272	0.896638
ENSG00000004487.10,KDM1A,coding,chr1:23218527-23282769	ENSG00000001561.5,ENPP4,coding,chr6:46205659-46222394	0.896638
ENSG00000004487.10,KDM1A,coding,chr1:23218527-23282769	ENSG00000006282.12,SPATA20,coding,chr17:45975417-45988212	0.896638
ENSG00000004487.10,KDM1A,coding,chr1:23218527-23282769	ENSG00000008018.7,PSMB1,coding,chr6:170686129-170704354	0.896638
ENSG00000004487.10,KDM1A,coding,chr1:23218527-23282769	ENSG00000029993.10,HMGB3,coding,chrX:149899639-149909906	0.896638
ENSG00000004487.10,KDM1A,coding,chr1:23218527-23282769	ENSG00000014123.9,UFL1,coding,chr6:97076191-97109873	0.896638
ENSG00000004487.10,KDM1A,coding,chr1:23218527-23282769	ENSG00000114383.5,TUSC2,coding,chr3:50332461-50340686	0.896638
ENSG00000004487.10,KDM1A,coding,chr1:23218527-23282769	ENSG00000001497.12,LAS1L,coding,chrX:64649186-64671380	0.896638
ENSG00000004487.10,KDM1A,coding,chr1:23218527-23282769	ENSG00000017797.6,RALBP1,coding,chr18:9465006-9528112	0.896638
ENSG00000004487.10,KDM1A,coding,chr1:23218527-23282769	ENSG00000003402.12,CFLAR,coding,chr2:201689071-201737278	0.896638
ENSG00000004534.9,RBM6,coding,chr3:49952443-50112482	ENSG00000003756.11,RBM5,coding,chr3:50101344-50131458	0.910786
ENSG00000004534.9,RBM6,coding,chr3:49952443-50112482	ENSG00000010322.10,NISCH,coding,chr3:52464173-52502127	0.910786
ENSG00000004534.9,RBM6,coding,chr3:49952443-50112482	ENSG00000055955.10,ITIH4,coding,chr3:52822030-52840535	0.910786
ENSG00000004534.9,RBM6,coding,chr3:49952443-50112482	ENSG00000061936.4,SFSWAP,coding,chr12:130761578-130850235	0.910786
ENSG00000004534.9,RBM6,coding,chr3:49952443-50112482	ENSG00000007392.12,LUC7L,coding,chr16:178968-219463	0.910786
ENSG00000004534.9,RBM6,coding,chr3:49952443-50112482	ENSG00000008128.15,CDK11A,coding,chr1:1624028-1645826	0.910786
ENSG00000004534.9,RBM6,coding,chr3:49952443-50112482	ENSG00000003393.10,ALS2,coding,chr2:202273521-202354157	0.910786
ENSG00000004534.9,RBM6,coding,chr3:49952443-50112482	ENSG00000002016.11,RAD52,coding,chr12:891503-970617	0.910786
ENSG00000004534.9,RBM6,coding,chr3:49952443-50112482	ENSG00000074621.8,SLC24A1,coding,chr15:63690768-63734905	0.910786
ENSG00000004534.9,RBM6,coding,chr3:49952443-50112482	ENSG00000067208.8,EVI5,coding,chr1:92746840-93030549	0.910786
ENSG00000004534.9,RBM6,coding,chr3:49952443-50112482	ENSG00000005955.7,GGNBP2,coding,chr17:31974885-32020391	0.910786
ENSG00000004534.9,RBM6,coding,chr3:49952443-50112482	ENSG00000112695.7,COX7A2,coding,chr6:76004110-76016759	0.910786
ENSG00000004534.9,RBM6,coding,chr3:49952443-50112482	ENSG00000001497.12,LAS1L,coding,chrX:64649186-64671380	0.910786
ENSG00000004534.9,RBM6,coding,chr3:49952443-50112482	ENSG00000001617.7,SEMA3F,coding,chr3:50167481-50201512	0.910786
ENSG00000004534.9,RBM6,coding,chr3:49952443-50112482	ENSG00000001629.5,ANKIB1,coding,chr7:91713483-91868634	0.910786
ENSG00000004534.9,RBM6,coding,chr3:49952443-50112482	ENSG00000001461.11,NIPAL3,coding,chr1:24614870-24672053	0.910786
ENSG00000004534.9,RBM6,coding,chr3:49952443-50112482	ENSG00000001167.10,NFYA,coding,chr6:41148661-41175693	0.910786
ENSG00000004534.9,RBM6,coding,chr3:49952443-50112482	ENSG00000000457.8,SCYL3,coding,chr1:168088427-168130032	0.910786
ENSG00000004534.9,RBM6,coding,chr3:49952443-50112482	ENSG00000065802.7,ASB1,coding,chr2:239000121-239025630	0.910786
ENSG00000004534.9,RBM6,coding,chr3:49952443-50112482	ENSG00000005022.5,SLC25A5,coding,chrX:118486390-118489310	0.910786
ENSG00000004534.9,RBM6,coding,chr3:49952443-50112482	ENSG00000001460.12,C1orf201,coding,chr1:24556075-24616011	0.910786
ENSG00000004534.9,RBM6,coding,chr3:49952443-50112482	ENSG00000002745.7,WNT16,coding,chr7:120752656-120768394	0.910786
ENSG00000004534.9,RBM6,coding,chr3:49952443-50112482	ENSG00000010017.8,RANBP9,coding,chr6:13729708-13819932	0.910786
ENSG00000004534.9,RBM6,coding,chr3:49952443-50112482	ENSG00000007866.13,TEAD3,coding,chr6:35549351-35572839	0.910786
ENSG00000004534.9,RBM6,coding,chr3:49952443-50112482	ENSG00000000419.7,DPM1,coding,chr20:48984810-49008499	0.910786
ENSG00000004534.9,RBM6,coding,chr3:49952443-50112482	ENSG00000003147.13,ICA1,coding,chr7:8119338-8268842	0.910786
ENSG00000004534.9,RBM6,coding,chr3:49952443-50112482	ENSG00000001084.6,GCLC,coding,chr6:53470097-53589727	0.910786
ENSG00000004534.9,RBM6,coding,chr3:49952443-50112482	ENSG00000004766.11,CCDC132,coding,chr7:92699588-92826274	0.910786
ENSG00000004534.9,RBM6,coding,chr3:49952443-50112482	ENSG00000005175.5,RPAP3,coding,chr12:46343336-46386111	0.910786
ENSG00000004534.9,RBM6,coding,chr3:49952443-50112482	ENSG00000005812.6,FBXL3,coding,chr13:76464740-76499331	0.910786
ENSG00000004534.9,RBM6,coding,chr3:49952443-50112482	ENSG00000065989.9,PDE4A,coding,chr19:10388448-10441305	0.910786
ENSG00000004534.9,RBM6,coding,chr3:49952443-50112482	ENSG00000081791.4,KIAA0141,coding,chr5:141283556-141301796	0.910786
ENSG00000004534.9,RBM6,coding,chr3:49952443-50112482	ENSG00000024862.11,CCDC28A,coding,chr6:139136349-139156149	0.910786
ENSG00000004534.9,RBM6,coding,chr3:49952443-50112482	ENSG00000008324.6,SS18L2,coding,chr3:42598335-42611610	0.910786
ENSG00000004534.9,RBM6,coding,chr3:49952443-50112482	ENSG00000002919.9,SNX11,coding,chr17:43539909-43555104	0.910786
ENSG00000004534.9,RBM6,coding,chr3:49952443-50112482	ENSG00000065427.10,KARS,coding,chr16:74219122-74240042	0.910786
ENSG00000004534.9,RBM6,coding,chr3:49952443-50112482	ENSG00000154473.11,BUB3,coding,chr10:124903782-124914876	0.910786
ENSG00000004534.9,RBM6,coding,chr3:49952443-50112482	ENSG00000003056.3,M6PR,coding,chr12:8984225-8993818	0.910786
ENSG00000004534.9,RBM6,coding,chr3:49952443-50112482	ENSG00000004468.6,CD38,coding,chr4:15388995-15460167	0.910786
ENSG00000004534.9,RBM6,coding,chr3:49952443-50112482	ENSG00000018236.9,CNTN1,coding,chr12:39372510-39752039	0.910786
ENSG00000004534.9,RBM6,coding,chr3:49952443-50112482	ENSG00000001630.10,CYP51A1,coding,chr7:91579400-91610202	0.910786
ENSG00000004534.9,RBM6,coding,chr3:49952443-50112482	ENSG00000004948.8,CALCR,coding,chr7:92891734-93041978	0.910786
ENSG00000004700.11,RECQL,coding,chr12:21513111-21545870	ENSG00000003056.3,M6PR,coding,chr12:8984225-8993818	0.920892
ENSG00000004700.11,RECQL,coding,chr12:21513111-21545870	ENSG00000111711.4,GOLT1B,coding,chr12:21545981-21562358	0.920892
ENSG00000004700.11,RECQL,coding,chr12:21513111-21545870	ENSG00000064115.6,TM7SF3,coding,chr12:27017394-27058634	0.920892
ENSG00000004700.11,RECQL,coding,chr12:21513111-21545870	ENSG00000023734.6,STRAP,coding,chr12:15926591-15947679	0.920892
ENSG00000004700.11,RECQL,coding,chr12:21513111-21545870	ENSG00000118007.8,STAG1,coding,chr3:137537766-137953910	0.920892
ENSG00000004700.11,RECQL,coding,chr12:21513111-21545870	ENSG00000000460.11,C1orf112,coding,chr1:167897868-168089845	0.920892
ENSG00000004700.11,RECQL,coding,chr12:21513111-21545870	ENSG00000168282.3,MGAT2,coding,chr14:49157238-49159948	0.920892
ENSG00000004700.11,RECQL,coding,chr12:21513111-21545870	ENSG00000004897.5,CDC27,coding,chr17:42550067-42621787	0.920892
ENSG00000004700.11,RECQL,coding,chr12:21513111-21545870	ENSG00000010292.7,NCAPD2,coding,chr12:6472782-6511382	0.920892
ENSG00000004700.11,RECQL,coding,chr12:21513111-21545870	ENSG00000001629.5,ANKIB1,coding,chr7:91713483-91868634	0.920892
ENSG00000004700.11,RECQL,coding,chr12:21513111-21545870	ENSG00000123444.8,KBTBD4,coding,chr11:47550324-47557143	0.920892
ENSG00000004700.11,RECQL,coding,chr12:21513111-21545870	ENSG00000000457.8,SCYL3,coding,chr1:168088427-168130032	0.920892
ENSG00000004700.11,RECQL,coding,chr12:21513111-21545870	ENSG00000008988.5,RPS20,coding,chr8:57142407-57149623	0.920892
ENSG00000004700.11,RECQL,coding,chr12:21513111-21545870	ENSG00000068305.12,MEF2A,coding,chr15:97834892-98074194	0.920892
ENSG00000004700.11,RECQL,coding,chr12:21513111-21545870	ENSG00000119596.11,YLPM1,coding,chr14:74299821-74373765	0.920892
ENSG00000004700.11,RECQL,coding,chr12:21513111-21545870	ENSG00000111726.8,CMAS,coding,chr12:22090374-22109875	0.920892
ENSG00000004700.11,RECQL,coding,chr12:21513111-21545870	ENSG00000023697.8,DERA,coding,chr12:15955372-16081487	0.920892
ENSG00000004700.11,RECQL,coding,chr12:21513111-21545870	ENSG00000102781.9,KATNAL1,coding,chr13:29674766-29779621	0.920892
ENSG00000004700.11,RECQL,coding,chr12:21513111-21545870	ENSG00000001167.10,NFYA,coding,chr6:41148661-41175693	0.920892
ENSG00000004700.11,RECQL,coding,chr12:21513111-21545870	ENSG00000004487.10,KDM1A,coding,chr1:23218527-23282769	0.920892
ENSG00000004700.11,RECQL,coding,chr12:21513111-21545870	ENSG00000002834.11,LASP1,coding,chr17:34279781-34331549	0.920892
ENSG00000004700.11,RECQL,coding,chr12:21513111-21545870	ENSG00000151838.6,C14orf38,coding,chr14:59041553-59113302	0.920892
ENSG00000004700.11,RECQL,coding,chr12:21513111-21545870	ENSG00000083937.4,CHMP2B,coding,chr3:87359110-87387388	0.920892
ENSG00000004700.11,RECQL,coding,chr12:21513111-21545870	ENSG00000002016.11,RAD52,coding,chr12:891503-970617	0.920892
ENSG00000004700.11,RECQL,coding,chr12:21513111-21545870	ENSG00000114125.9,RNF7,coding,chr3:142939735-142949092	0.920892
ENSG00000004700.11,RECQL,coding,chr12:21513111-21545870	ENSG00000008324.6,SS18L2,coding,chr3:42598335-42611610	0.920892
ENSG00000004700.11,RECQL,coding,chr12:21513111-21545870	ENSG00000003137.4,CYP26B1,coding,chr2:72209874-72228675	0.920892
ENSG00000004700.11,RECQL,coding,chr12:21513111-21545870	ENSG00000112210.6,RAB23,coding,chr6:57161539-57195037	0.920892
ENSG00000004700.11,RECQL,coding,chr12:21513111-21545870	ENSG00000000938.7,FGR,coding,chr1:27811161-27834375	0.920892
ENSG00000004700.11,RECQL,coding,chr12:21513111-21545870	ENSG00000002746.8,HECW1,coding,chr7:43118722-43569463	0.920892
ENSG00000004700.11,RECQL,coding,chr12:21513111-21545870	ENSG00000008283.10,CYB561,coding,chr17:58863399-58877454	0.920892
ENSG00000004700.11,RECQL,coding,chr12:21513111-21545870	ENSG00000002933.3,TMEM176A,coding,chr7:150128423-150133141	0.920892
ENSG00000004700.11,RECQL,coding,chr12:21513111-21545870	ENSG00000005001.3,PRSS22,coding,chr16:2842728-2848172	0.920892
ENSG00000004700.11,RECQL,coding,chr12:21513111-21545870	ENSG00000000003.9,TSPAN6,coding,chrX:99770322-99781644	0.920892
ENSG00000004700.11,RECQL,coding,chr12:21513111-21545870	ENSG00000005206.9,AC004410.1,coding,chr19:2279628-2306099	0.920892
ENSG00000004700.11,RECQL,coding,chr12:21513111-21545870	ENSG00000148832.9,PAOX,coding,chr10:135042684-135055188	0.920892
ENSG00000004700.11,RECQL,coding,chr12:21513111-21545870	ENSG00000041880.10,PARP3,coding,chr3:51951400-51957923	0.920892
ENSG00000004766.11,CCDC132,coding,chr7:92699588-92826274	ENSG00000001629.5,ANKIB1,coding,chr7:91713483-91868634	0.850955
ENSG00000004766.11,CCDC132,coding,chr7:92699588-92826274	ENSG00000001631.9,KRIT1,coding,chr7:91666218-91713416	0.850955
ENSG00000004766.11,CCDC132,coding,chr7:92699588-92826274	ENSG00000128513.8,POT1,coding,chr7:124249675-124357273	0.850955
ENSG00000004766.11,CCDC132,coding,chr7:92699588-92826274	ENSG00000105829.6,BET1,coding,chr7:93430009-93471630	0.850955
ENSG00000004766.11,CCDC132,coding,chr7:92699588-92826274	ENSG00000106290.10,TAF6,coding,chr7:99542628-99555400	0.850955
ENSG00000004766.11,CCDC132,coding,chr7:92699588-92826274	ENSG00000005469.7,CROT,coding,chr7:86812932-86867047	0.850955
ENSG00000004766.11,CCDC132,coding,chr7:92699588-92826274	ENSG00000004864.8,SLC25A13,coding,chr7:95587467-95789395	0.850955
ENSG00000004766.11,CCDC132,coding,chr7:92699588-92826274	ENSG00000036054.8,TBC1D23,coding,chr3:101462533-101526785	0.850955
ENSG00000004766.11,CCDC132,coding,chr7:92699588-92826274	ENSG00000001630.10,CYP51A1,coding,chr7:91579400-91610202	0.850955
ENSG00000004766.11,CCDC132,coding,chr7:92699588-92826274	ENSG00000000457.8,SCYL3,coding,chr1:168088427-168130032	0.850955
ENSG00000004766.11,CCDC132,coding,chr7:92699588-92826274	ENSG00000000460.11,C1orf112,coding,chr1:167897868-168089845	0.850955
ENSG00000004766.11,CCDC132,coding,chr7:92699588-92826274	ENSG00000004948.8,CALCR,coding,chr7:92891734-93041978	0.850955
ENSG00000004766.11,CCDC132,coding,chr7:92699588-92826274	ENSG00000181761.5,OR8H3,coding,chr11:55646424-55647363	0.850955
ENSG00000004766.11,CCDC132,coding,chr7:92699588-92826274	ENSG00000001461.11,NIPAL3,coding,chr1:24614870-24672053	0.850955
ENSG00000004766.11,CCDC132,coding,chr7:92699588-92826274	ENSG00000067900.4,ROCK1,coding,chr18:16783698-16945810	0.850955
ENSG00000004766.11,CCDC132,coding,chr7:92699588-92826274	ENSG00000141252.13,VPS53,coding,chr17:358657-564846	0.850955
ENSG00000004766.11,CCDC132,coding,chr7:92699588-92826274	ENSG00000001036.8,FUCA2,coding,chr6:143858306-143874520	0.850955
ENSG00000004766.11,CCDC132,coding,chr7:92699588-92826274	ENSG00000177476.2,OR2G3,coding,chr1:245835478-245836461	0.850955
ENSG00000004766.11,CCDC132,coding,chr7:92699588-92826274	ENSG00000182670.9,TTC3,coding,chr21:37367395-37497283	0.850955
ENSG00000004766.11,CCDC132,coding,chr7:92699588-92826274	ENSG00000000419.7,DPM1,coding,chr20:48984810-49008499	0.850955
ENSG00000004766.11,CCDC132,coding,chr7:92699588-92826274	ENSG00000111181.8,SLC6A12,coding,chr12:169503-193997	0.850955
ENSG00000004766.11,CCDC132,coding,chr7:92699588-92826274	ENSG00000005102.8,MEOX1,coding,chr17:39073281-39094848	0.850955
ENSG00000004766.11,CCDC132,coding,chr7:92699588-92826274	ENSG00000059691.7,PET112,coding,chr4:152811105-152901625	0.850955
ENSG00000004766.11,CCDC132,coding,chr7:92699588-92826274	ENSG00000004059.5,ARF5,coding,chr7:127015634-127018995	0.850955
ENSG00000004766.11,CCDC132,coding,chr7:92699588-92826274	ENSG00000019505.3,SYT13,coding,chr11:45218427-45264446	0.850955
ENSG00000004766.11,CCDC132,coding,chr7:92699588-92826274	ENSG00000013364.13,MVP,coding,chr16:29736060-29766856	0.850955
ENSG00000004777.10,ARHGAP33,coding,chr19:40958256-40971564	ENSG00000089336.6,AC002115.6.1,lncRNA,chr19:40795504-40808091	0.866031
ENSG00000004777.10,ARHGAP33,coding,chr19:40958256-40971564	ENSG00000075702.9,WDR62,coding,chr19:41237622-41287852	0.866031
ENSG00000004777.10,ARHGAP33,coding,chr19:40958256-40971564	ENSG00000008710.11,PKD1,coding,chr16:2078711-2125900	0.866031
ENSG00000004777.10,ARHGAP33,coding,chr19:40958256-40971564	ENSG00000075826.11,SEC31B,coding,chr10:102236388-102279618	0.866031
ENSG00000004777.10,ARHGAP33,coding,chr19:40958256-40971564	ENSG00000044459.9,CNTLN,coding,chr9:17124979-17493921	0.866031
ENSG00000004777.10,ARHGAP33,coding,chr19:40958256-40971564	ENSG00000007968.6,E2F2,coding,chr1:23705508-23730299	0.866031
ENSG00000004777.10,ARHGAP33,coding,chr19:40958256-40971564	ENSG00000006025.6,OSBPL7,coding,chr17:43239731-43254199	0.866031
ENSG00000004777.10,ARHGAP33,coding,chr19:40958256-40971564	ENSG00000009950.11,MLXIPL,coding,chr7:72645459-72676809	0.866031
ENSG00000004777.10,ARHGAP33,coding,chr19:40958256-40971564	ENSG00000099840.7,IZUMO4,coding,chr19:2047379-2050592	0.866031
ENSG00000004777.10,ARHGAP33,coding,chr19:40958256-40971564	ENSG00000006712.9,PAF1,coding,chr19:44568114-44573597	0.866031
ENSG00000004777.10,ARHGAP33,coding,chr19:40958256-40971564	ENSG00000102710.13,FAM48A,coding,chr13:36481448-36531850	0.866031
ENSG00000004777.10,ARHGAP33,coding,chr19:40958256-40971564	ENSG00000005206.9,AC004410.1,coding,chr19:2279628-2306099	0.866031
ENSG00000004777.10,ARHGAP33,coding,chr19:40958256-40971564	ENSG00000024526.11,DEPDC1,coding,chr1:68712422-68735492	0.866031
ENSG00000004777.10,ARHGAP33,coding,chr19:40958256-40971564	ENSG00000126259.10,KIRREL2,coding,chr19:41039649-41049888	0.866031
ENSG00000004777.10,ARHGAP33,coding,chr19:40958256-40971564	ENSG00000003987.9,MTMR7,coding,chr8:17199909-17315408	0.866031
ENSG00000004777.10,ARHGAP33,coding,chr19:40958256-40971564	ENSG00000000460.11,C1orf112,coding,chr1:167897868-168089845	0.866031
ENSG00000004777.10,ARHGAP33,coding,chr19:40958256-40971564	ENSG00000004139.8,SARM1,coding,chr17:23715504-23752173	0.866031
ENSG00000004777.10,ARHGAP33,coding,chr19:40958256-40971564	ENSG00000002016.11,RAD52,coding,chr12:891503-970617	0.866031
ENSG00000004777.10,ARHGAP33,coding,chr19:40958256-40971564	ENSG00000001497.12,LAS1L,coding,chrX:64649186-64671380	0.866031
ENSG00000004777.10,ARHGAP33,coding,chr19:40958256-40971564	ENSG00000002745.7,WNT16,coding,chr7:120752656-120768394	0.866031
ENSG00000004777.10,ARHGAP33,coding,chr19:40958256-40971564	ENSG00000003402.12,CFLAR,coding,chr2:201689071-201737278	0.866031
ENSG00000004777.10,ARHGAP33,coding,chr19:40958256-40971564	ENSG00000010438.11,PRSS3,coding,chr9:33740514-33789230	0.866031
ENSG00000004777.10,ARHGAP33,coding,chr19:40958256-40971564	ENSG00000005238.13,FAM214B,coding,chr9:35094108-35105999	0.866031
ENSG00000004777.10,ARHGAP33,coding,chr19:40958256-40971564	ENSG00000006576.11,PHTF2,coding,chr7:77266044-77424754	0.866031
ENSG00000004777.10,ARHGAP33,coding,chr19:40958256-40971564	ENSG00000001460.12,C1orf201,coding,chr1:24556075-24616011	0.866031
ENSG00000004777.10,ARHGAP33,coding,chr19:40958256-40971564	ENSG00000106123.7,EPHB6,coding,chr7:142262913-142278969	0.866031
ENSG00000004777.10,ARHGAP33,coding,chr19:40958256-40971564	ENSG00000106246.9,PTCD1,coding,chr7:98852297-98901756	0.866031
ENSG00000004777.10,ARHGAP33,coding,chr19:40958256-40971564	ENSG00000086205.11,FOLH1,coding,chr11:49124762-49186798	0.866031
ENSG00000004777.10,ARHGAP33,coding,chr19:40958256-40971564	ENSG00000083828.8,ZNF586,coding,chr19:62972808-63012429	0.866031
ENSG00000004777.10,ARHGAP33,coding,chr19:40958256-40971564	ENSG00000104324.11,PGCP.1,coding,chr8:97726630-98231058	0.866031
ENSG00000004777.10,ARHGAP33,coding,chr19:40958256-40971564	ENSG00000003056.3,M6PR,coding,chr12:8984225-8993818	0.866031
ENSG00000004777.10,ARHGAP33,coding,chr19:40958256-40971564	ENSG00000003989.12,SLC7A2,coding,chr8:17398977-17467057	0.866031
ENSG00000004777.10,ARHGAP33,coding,chr19:40958256-40971564	ENSG00000082126.11,MPP4,coding,chr2:202217837-202271662	0.866031
ENSG00000004777.10,ARHGAP33,coding,chr19:40958256-40971564	ENSG00000002919.9,SNX11,coding,chr17:43539909-43555104	0.866031
ENSG00000004777.10,ARHGAP33,coding,chr19:40958256-40971564	ENSG00000101298.9,SNPH,coding,chr20:1194959-1237972	0.866031
ENSG00000004777.10,ARHGAP33,coding,chr19:40958256-40971564	ENSG00000007264.8,MATK,coding,chr19:3728967-3752810	0.866031
ENSG00000004777.10,ARHGAP33,coding,chr19:40958256-40971564	ENSG00000013561.13,RNF14,coding,chr5:141318076-141350040	0.866031
ENSG00000004777.10,ARHGAP33,coding,chr19:40958256-40971564	ENSG00000005700.10,IBTK,coding,chr6:82936418-83014190	0.866031
ENSG00000004777.10,ARHGAP33,coding,chr19:40958256-40971564	ENSG00000008441.10,NFIX,coding,chr19:12967583-13070610	0.866031
ENSG00000004779.4,NDUFAB1,coding,chr16:23499823-23515178	ENSG00000037241.3,RPL26L1,coding,chr5:172318337-172329380	0.936053
ENSG00000004779.4,NDUFAB1,coding,chr16:23499823-23515178	ENSG00000090263.10,MRPS33,coding,chr7:140348664-140361497	0.936053
ENSG00000004779.4,NDUFAB1,coding,chr16:23499823-23515178	ENSG00000090266.7,NDUFB2,coding,chr7:140037045-140069059	0.936053
ENSG00000004779.4,NDUFAB1,coding,chr16:23499823-23515178	ENSG00000119013.4,NDUFB3,coding,chr2:201644400-201658718	0.936053
ENSG00000004779.4,NDUFAB1,coding,chr16:23499823-23515178	ENSG00000006432.10,MAP3K9,coding,chr14:70258995-70346004	0.936053
ENSG00000004779.4,NDUFAB1,coding,chr16:23499823-23515178	ENSG00000101132.5,PFDN4,coding,chr20:52257792-52277998	0.936053
ENSG00000004779.4,NDUFAB1,coding,chr16:23499823-23515178	ENSG00000119705.5,SLIRP,coding,chr14:77244166-77297200	0.936053
ENSG00000004779.4,NDUFAB1,coding,chr16:23499823-23515178	ENSG00000117410.8,ATP6V0B,coding,chr1:44212745-44216554	0.936053
ENSG00000004779.4,NDUFAB1,coding,chr16:23499823-23515178	ENSG00000088986.6,DYNLL1,coding,chr12:119392035-119420679	0.936053
ENSG00000004779.4,NDUFAB1,coding,chr16:23499823-23515178	ENSG00000015133.13,CCDC88C,coding,chr14:90807419-90953941	0.936053
ENSG00000004779.4,NDUFAB1,coding,chr16:23499823-23515178	ENSG00000005483.13,MLL5,coding,chr7:104441861-104542044	0.936053
ENSG00000004779.4,NDUFAB1,coding,chr16:23499823-23515178	ENSG00000008018.7,PSMB1,coding,chr6:170686129-170704354	0.936053
ENSG00000004779.4,NDUFAB1,coding,chr16:23499823-23515178	ENSG00000004059.5,ARF5,coding,chr7:127015634-127018995	0.936053
ENSG00000004779.4,NDUFAB1,coding,chr16:23499823-23515178	ENSG00000005007.7,UPF1,coding,chr19:18803743-18840038	0.936053
ENSG00000004779.4,NDUFAB1,coding,chr16:23499823-23515178	ENSG00000003756.11,RBM5,coding,chr3:50101344-50131458	0.936053
ENSG00000004779.4,NDUFAB1,coding,chr16:23499823-23515178	ENSG00000005022.5,SLC25A5,coding,chrX:118486390-118489310	0.936053
ENSG00000004779.4,NDUFAB1,coding,chr16:23499823-23515178	ENSG00000004139.8,SARM1,coding,chr17:23715504-23752173	0.936053
ENSG00000004779.4,NDUFAB1,coding,chr16:23499823-23515178	ENSG00000005339.6,CREBBP,coding,chr16:3715055-3870723	0.936053
ENSG00000004779.4,NDUFAB1,coding,chr16:23499823-23515178	ENSG00000007255.5,TRAPPC6A,coding,chr19:50358026-50373325	0.936053
ENSG00000004779.4,NDUFAB1,coding,chr16:23499823-23515178	ENSG00000003393.10,ALS2,coding,chr2:202273521-202354157	0.936053
ENSG00000004779.4,NDUFAB1,coding,chr16:23499823-23515178	ENSG00000002330.8,BAD,coding,chr11:63793877-63808752	0.936053
ENSG00000004779.4,NDUFAB1,coding,chr16:23499823-23515178	ENSG00000006015.12,C19orf60,coding,chr19:18560494-18564146	0.936053
ENSG00000004779.4,NDUFAB1,coding,chr16:23499823-23515178	ENSG00000002834.11,LASP1,coding,chr17:34279781-34331549	0.936053
ENSG00000004779.4,NDUFAB1,coding,chr16:23499823-23515178	ENSG00000000419.7,DPM1,coding,chr20:48984810-49008499	0.936053
ENSG00000004779.4,NDUFAB1,coding,chr16:23499823-23515178	ENSG00000105939.7,ZC3HAV1,coding,chr7:138378805-138445005	0.936053
ENSG00000004779.4,NDUFAB1,coding,chr16:23499823-23515178	ENSG00000001629.5,ANKIB1,coding,chr7:91713483-91868634	0.936053
ENSG00000004779.4,NDUFAB1,coding,chr16:23499823-23515178	ENSG00000196396.5,PTPN1,coding,chr20:48560297-48634706	0.936053
ENSG00000004779.4,NDUFAB1,coding,chr16:23499823-23515178	ENSG00000047578.6,KIAA0556,coding,chr16:27468954-27699191	0.936053
ENSG00000004779.4,NDUFAB1,coding,chr16:23499823-23515178	ENSG00000001461.11,NIPAL3,coding,chr1:24614870-24672053	0.936053
ENSG00000004779.4,NDUFAB1,coding,chr16:23499823-23515178	ENSG00000002016.11,RAD52,coding,chr12:891503-970617	0.936053
ENSG00000004779.4,NDUFAB1,coding,chr16:23499823-23515178	ENSG00000077150.12,NFKB2,coding,chr10:104144218-104152271	0.936053
ENSG00000004779.4,NDUFAB1,coding,chr16:23499823-23515178	ENSG00000132361.8,KIAA0664,coding,chr17:2539429-2561677	0.936053
ENSG00000004779.4,NDUFAB1,coding,chr16:23499823-23515178	ENSG00000166847.5,DCTN5,coding,chr16:23560213-23588696	0.936053
ENSG00000004779.4,NDUFAB1,coding,chr16:23499823-23515178	ENSG00000002822.9,MAD1L1,coding,chr7:1821908-2239404	0.936053
ENSG00000004779.4,NDUFAB1,coding,chr16:23499823-23515178	ENSG00000090905.13,TNRC6A,coding,chr16:24648516-24746454	0.936053
ENSG00000004779.4,NDUFAB1,coding,chr16:23499823-23515178	ENSG00000009954.6,BAZ1B,coding,chr7:72492663-72574544	0.936053
ENSG00000004779.4,NDUFAB1,coding,chr16:23499823-23515178	ENSG00000001167.10,NFYA,coding,chr6:41148661-41175693	0.936053
ENSG00000004779.4,NDUFAB1,coding,chr16:23499823-23515178	ENSG00000125351.5,UPF3B,coding,chrX:118852012-118870989	0.936053
ENSG00000004779.4,NDUFAB1,coding,chr16:23499823-23515178	ENSG00000005189.14,AC004381.6.1,coding,chr16:20725251-20768491	0.936053
ENSG00000004779.4,NDUFAB1,coding,chr16:23499823-23515178	ENSG00000136197.6,C7orf25,coding,chr7:42915396-42918429	0.936053
ENSG00000004779.4,NDUFAB1,coding,chr16:23499823-23515178	ENSG00000006007.7,GDE1,coding,chr16:19420515-19440968	0.936053
ENSG00000004779.4,NDUFAB1,coding,chr16:23499823-23515178	ENSG00000003137.4,CYP26B1,coding,chr2:72209874-72228675	0.936053
ENSG00000004779.4,NDUFAB1,coding,chr16:23499823-23515178	ENSG00000004975.6,DVL2,coding,chr17:7069383-7078592	0.936053
ENSG00000004779.4,NDUFAB1,coding,chr16:23499823-23515178	ENSG00000000003.9,TSPAN6,coding,chrX:99770322-99781644	0.936053
ENSG00000004779.4,NDUFAB1,coding,chr16:23499823-23515178	ENSG00000083093.5,PALB2,coding,chr16:23521988-23560132	0.936053
ENSG00000004779.4,NDUFAB1,coding,chr16:23499823-23515178	ENSG00000000457.8,SCYL3,coding,chr1:168088427-168130032	0.936053
ENSG00000004779.4,NDUFAB1,coding,chr16:23499823-23515178	ENSG00000002587.5,HS3ST1,coding,chr4:11003871-11040487	0.936053
ENSG00000004779.4,NDUFAB1,coding,chr16:23499823-23515178	ENSG00000001084.6,GCLC,coding,chr6:53470097-53589727	0.936053
ENSG00000004779.4,NDUFAB1,coding,chr16:23499823-23515178	ENSG00000099246.10,RAB18,coding,chr10:27833202-27871149	0.936053
ENSG00000004779.4,NDUFAB1,coding,chr16:23499823-23515178	ENSG00000004838.9,ZMYND10,coding,chr3:50353544-50359287	0.936053
ENSG00000004779.4,NDUFAB1,coding,chr16:23499823-23515178	ENSG00000073350.8,LLGL2,coding,chr17:71033377-71082884	0.936053
ENSG00000004779.4,NDUFAB1,coding,chr16:23499823-23515178	ENSG00000002549.7,LAP3,coding,chr4:17187912-17218693	0.936053
ENSG00000004779.4,NDUFAB1,coding,chr16:23499823-23515178	ENSG00000005187.7,ACSM3,coding,chr16:20529065-20716404	0.936053
ENSG00000004779.4,NDUFAB1,coding,chr16:23499823-23515178	ENSG00000058600.11,POLR3E,coding,chr16:22216230-22253925	0.936053
ENSG00000004779.4,NDUFAB1,coding,chr16:23499823-23515178	ENSG00000001561.5,ENPP4,coding,chr6:46205659-46222394	0.936053
ENSG00000004779.4,NDUFAB1,coding,chr16:23499823-23515178	ENSG00000023228.8,NDUFS1,coding,chr2:206694393-206732572	0.936053
ENSG00000004779.4,NDUFAB1,coding,chr16:23499823-23515178	ENSG00000026950.12,BTN3A1,coding,chr6:26510443-26523423	0.936053
ENSG00000004779.4,NDUFAB1,coding,chr16:23499823-23515178	ENSG00000105255.5,FSD1,coding,chr19:4255590-4274843	0.936053
ENSG00000004779.4,NDUFAB1,coding,chr16:23499823-23515178	ENSG00000002726.14,ABP1,coding,chr7:150152647-150189525	0.936053
ENSG00000004779.4,NDUFAB1,coding,chr16:23499823-23515178	ENSG00000103353.9,UBFD1,coding,chr16:23475892-23493211	0.936053
ENSG00000004838.9,ZMYND10,coding,chr3:50353544-50359287	ENSG00000136918.3,WDR38,coding,chr9:126655575-126659981	0.934991
ENSG00000004838.9,ZMYND10,coding,chr3:50353544-50359287	ENSG00000111834.7,RSPH4A,coding,chr6:117044334-117060841	0.934991
ENSG00000004838.9,ZMYND10,coding,chr3:50353544-50359287	ENSG00000089101.11,C20orf26,coding,chr20:19981157-20289346	0.934991
ENSG00000004838.9,ZMYND10,coding,chr3:50353544-50359287	ENSG00000092850.7,TEKT2,coding,chr1:36322262-36326463	0.934991
ENSG00000004838.9,ZMYND10,coding,chr3:50353544-50359287	ENSG00000088727.8,KIF9,coding,chr3:47244519-47299945	0.934991
ENSG00000004838.9,ZMYND10,coding,chr3:50353544-50359287	ENSG00000080572.8,CXorf41,coding,chrX:106336517-106374129	0.934991
ENSG00000004838.9,ZMYND10,coding,chr3:50353544-50359287	ENSG00000034239.5,EFCAB1,coding,chr8:49785900-49810423	0.934991
ENSG00000004838.9,ZMYND10,coding,chr3:50353544-50359287	ENSG00000008226.15,DLEC1,coding,chr3:38055699-38140520	0.934991
ENSG00000004838.9,ZMYND10,coding,chr3:50353544-50359287	ENSG00000007174.10,DNAH9,coding,chr17:11442472-11814210	0.934991
ENSG00000004838.9,ZMYND10,coding,chr3:50353544-50359287	ENSG00000001460.12,C1orf201,coding,chr1:24556075-24616011	0.934991
ENSG00000004838.9,ZMYND10,coding,chr3:50353544-50359287	ENSG00000005448.12,WDR54,coding,chr2:74502312-74506390	0.934991
ENSG00000004838.9,ZMYND10,coding,chr3:50353544-50359287	ENSG00000007516.8,BAIAP3,coding,chr16:1323602-1339440	0.934991
ENSG00000004838.9,ZMYND10,coding,chr3:50353544-50359287	ENSG00000016864.11,GLT8D1,coding,chr3:52703544-52715088	0.934991
ENSG00000004838.9,ZMYND10,coding,chr3:50353544-50359287	ENSG00000103540.11,CCP110,coding,chr16:19442633-19472231	0.934991
ENSG00000004838.9,ZMYND10,coding,chr3:50353544-50359287	ENSG00000005379.10,BZRAP1,coding,chr17:53733596-53761151	0.934991
ENSG00000004838.9,ZMYND10,coding,chr3:50353544-50359287	ENSG00000010256.6,UQCRC1,coding,chr3:48611438-48623413	0.934991
ENSG00000004838.9,ZMYND10,coding,chr3:50353544-50359287	ENSG00000003756.11,RBM5,coding,chr3:50101344-50131458	0.934991
ENSG00000004838.9,ZMYND10,coding,chr3:50353544-50359287	ENSG00000000003.9,TSPAN6,coding,chrX:99770322-99781644	0.934991
ENSG00000004838.9,ZMYND10,coding,chr3:50353544-50359287	ENSG00000000938.7,FGR,coding,chr1:27811161-27834375	0.934991
ENSG00000004838.9,ZMYND10,coding,chr3:50353544-50359287	ENSG00000000457.8,SCYL3,coding,chr1:168088427-168130032	0.934991
ENSG00000004838.9,ZMYND10,coding,chr3:50353544-50359287	ENSG00000068028.13,RASSF1,coding,chr3:50342222-50353415	0.934991
ENSG00000004838.9,ZMYND10,coding,chr3:50353544-50359287	ENSG00000001497.12,LAS1L,coding,chrX:64649186-64671380	0.934991
ENSG00000004838.9,ZMYND10,coding,chr3:50353544-50359287	ENSG00000067177.10,PHKA1,coding,chrX:71715388-71850892	0.934991
ENSG00000004838.9,ZMYND10,coding,chr3:50353544-50359287	ENSG00000110455.9,ACCS,coding,chr11:44044050-44062348	0.934991
ENSG00000004838.9,ZMYND10,coding,chr3:50353544-50359287	ENSG00000061455.9,PRDM6,coding,chr5:122452714-122551644	0.934991
ENSG00000004838.9,ZMYND10,coding,chr3:50353544-50359287	ENSG00000008324.6,SS18L2,coding,chr3:42598335-42611610	0.934991
ENSG00000004838.9,ZMYND10,coding,chr3:50353544-50359287	ENSG00000016602.8,CLCA4,coding,chr1:86785348-86819025	0.934991
ENSG00000004838.9,ZMYND10,coding,chr3:50353544-50359287	ENSG00000111432.4,FZD10,coding,chr12:129212956-129216238	0.934991
ENSG00000004838.9,ZMYND10,coding,chr3:50353544-50359287	ENSG00000004487.10,KDM1A,coding,chr1:23218527-23282769	0.934991
ENSG00000004838.9,ZMYND10,coding,chr3:50353544-50359287	ENSG00000003137.4,CYP26B1,coding,chr2:72209874-72228675	0.934991
ENSG00000004838.9,ZMYND10,coding,chr3:50353544-50359287	ENSG00000047634.10,SCML1,coding,chrX:17665508-17683026	0.934991
ENSG00000004838.9,ZMYND10,coding,chr3:50353544-50359287	ENSG00000136935.8,GOLGA1,coding,chr9:126680466-126750113	0.934991
ENSG00000004838.9,ZMYND10,coding,chr3:50353544-50359287	ENSG00000000005.5,TNMD,coding,chrX:99726454-99741538	0.934991
ENSG00000004838.9,ZMYND10,coding,chr3:50353544-50359287	ENSG00000009954.6,BAZ1B,coding,chr7:72492663-72574544	0.934991
ENSG00000004838.9,ZMYND10,coding,chr3:50353544-50359287	ENSG00000006071.6,ABCC8,coding,chr11:17371007-17455025	0.934991
ENSG00000004838.9,ZMYND10,coding,chr3:50353544-50359287	ENSG00000007545.10,CRAMP1L,coding,chr16:1602326-1667910	0.934991
ENSG00000004838.9,ZMYND10,coding,chr3:50353544-50359287	ENSG00000000460.11,C1orf112,coding,chr1:167897868-168089845	0.934991
ENSG00000004838.9,ZMYND10,coding,chr3:50353544-50359287	ENSG00000104689.5,TNFRSF10A,coding,chr8:23103909-23138584	0.934991
ENSG00000004838.9,ZMYND10,coding,chr3:50353544-50359287	ENSG00000001461.11,NIPAL3,coding,chr1:24614870-24672053	0.934991
ENSG00000004838.9,ZMYND10,coding,chr3:50353544-50359287	ENSG00000100479.7,POLE2,coding,chr14:49180022-49224890	0.934991
ENSG00000004838.9,ZMYND10,coding,chr3:50353544-50359287	ENSG00000111371.10,SLC38A1,coding,chr12:44867850-44950067	0.934991
ENSG00000004838.9,ZMYND10,coding,chr3:50353544-50359287	ENSG00000083520.10,DIS3,coding,chr13:72227540-72254235	0.934991
ENSG00000004838.9,ZMYND10,coding,chr3:50353544-50359287	ENSG00000163697.11,APBB2,coding,chr4:40506800-40913488	0.934991
ENSG00000004848.6,ARX,coding,chrX:24931731-24943986	ENSG00000147465.6,STAR,coding,chr8:38120323-38127940	0.854829
ENSG00000004848.6,ARX,coding,chrX:24931731-24943986	ENSG00000118004.12,COLEC11,coding,chr2:3620300-3669923	0.854829
ENSG00000004848.6,ARX,coding,chrX:24931731-24943986	ENSG00000136931.5,NR5A1,coding,chr9:126283336-126309530	0.854829
ENSG00000004848.6,ARX,coding,chrX:24931731-24943986	ENSG00000012504.9,NR1H4,coding,chr12:99391616-99482322	0.854829
ENSG00000004848.6,ARX,coding,chrX:24931731-24943986	ENSG00000110786.13,PTPN5,coding,chr11:18706050-18770844	0.854829
ENSG00000004848.6,ARX,coding,chrX:24931731-24943986	ENSG00000036828.9,CASR,coding,chr3:123385219-123488032	0.854829
ENSG00000004848.6,ARX,coding,chrX:24931731-24943986	ENSG00000008118.5,CAMK1G,coding,chr1:207823684-207853906	0.854829
ENSG00000004848.6,ARX,coding,chrX:24931731-24943986	ENSG00000136546.8,SCN7A,coding,chr2:166968328-167059003	0.854829
ENSG00000004848.6,ARX,coding,chrX:24931731-24943986	ENSG00000087116.9,ADAMTS2,coding,chr5:178470457-178705037	0.854829
ENSG00000004848.6,ARX,coding,chrX:24931731-24943986	ENSG00000069431.6,ABCC9,coding,chr12:21841601-21985603	0.854829
ENSG00000004848.6,ARX,coding,chrX:24931731-24943986	ENSG00000091482.5,SMPX,coding,chrX:21634010-21686202	0.854829
ENSG00000004848.6,ARX,coding,chrX:24931731-24943986	ENSG00000003096.9,KLHL13,coding,chrX:116915803-117135331	0.854829
ENSG00000004848.6,ARX,coding,chrX:24931731-24943986	ENSG00000002587.5,HS3ST1,coding,chr4:11003871-11040487	0.854829
ENSG00000004848.6,ARX,coding,chrX:24931731-24943986	ENSG00000005073.5,HOXA11,coding,chr7:27187653-27191367	0.854829
ENSG00000004848.6,ARX,coding,chrX:24931731-24943986	ENSG00000090539.10,CHRD,coding,chr3:185580554-185591218	0.854829
ENSG00000004848.6,ARX,coding,chrX:24931731-24943986	ENSG00000006611.10,USH1C,coding,chr11:17472017-17522539	0.854829
ENSG00000004848.6,ARX,coding,chrX:24931731-24943986	ENSG00000064205.6,WISP2,coding,chr20:42776898-42790564	0.854829
ENSG00000004848.6,ARX,coding,chrX:24931731-24943986	ENSG00000005156.5,LIG3,coding,chr17:30331654-30356196	0.854829
ENSG00000004848.6,ARX,coding,chrX:24931731-24943986	ENSG00000005007.7,UPF1,coding,chr19:18803743-18840038	0.854829
ENSG00000004848.6,ARX,coding,chrX:24931731-24943986	ENSG00000005249.6,PRKAR2B,coding,chr7:106472329-106589492	0.854829
ENSG00000004848.6,ARX,coding,chrX:24931731-24943986	ENSG00000000457.8,SCYL3,coding,chr1:168088427-168130032	0.854829
ENSG00000004848.6,ARX,coding,chrX:24931731-24943986	ENSG00000000003.9,TSPAN6,coding,chrX:99770322-99781644	0.854829
ENSG00000004848.6,ARX,coding,chrX:24931731-24943986	ENSG00000005022.5,SLC25A5,coding,chrX:118486390-118489310	0.854829
ENSG00000004848.6,ARX,coding,chrX:24931731-24943986	ENSG00000003137.4,CYP26B1,coding,chr2:72209874-72228675	0.854829
ENSG00000004848.6,ARX,coding,chrX:24931731-24943986	ENSG00000002549.7,LAP3,coding,chr4:17187912-17218693	0.854829
ENSG00000004848.6,ARX,coding,chrX:24931731-24943986	ENSG00000006576.11,PHTF2,coding,chr7:77266044-77424754	0.854829
ENSG00000004848.6,ARX,coding,chrX:24931731-24943986	ENSG00000004455.11,AK2,coding,chr1:33246171-33319184	0.854829
ENSG00000004848.6,ARX,coding,chrX:24931731-24943986	ENSG00000002933.3,TMEM176A,coding,chr7:150128423-150133141	0.854829
ENSG00000004848.6,ARX,coding,chrX:24931731-24943986	ENSG00000033867.12,SLC4A7,coding,chr3:27389217-27500915	0.854829
ENSG00000004848.6,ARX,coding,chrX:24931731-24943986	ENSG00000087494.10,PTHLH,coding,chr12:28002283-28016905	0.854829
ENSG00000004848.6,ARX,coding,chrX:24931731-24943986	ENSG00000006757.7,PNPLA4,coding,chrX:7826287-7855780	0.854829
ENSG00000004848.6,ARX,coding,chrX:24931731-24943986	ENSG00000006740.10,ARHGAP44,coding,chr17:12633553-12835685	0.854829
ENSG00000004897.5,CDC27,coding,chr17:42550067-42621787	ENSG00000073969.12,NSF,coding,chr17:42023390-42189997	0.872915
ENSG00000004897.5,CDC27,coding,chr17:42550067-42621787	ENSG00000141279.7,NPEPPS,coding,chr17:42955304-43055641	0.872915
ENSG00000004897.5,CDC27,coding,chr17:42550067-42621787	ENSG00000108433.9,GOSR2,coding,chr17:42355484-42460002	0.872915
ENSG00000004897.5,CDC27,coding,chr17:42550067-42621787	ENSG00000108424.4,KPNB1,coding,chr17:43081840-43115997	0.872915
ENSG00000004897.5,CDC27,coding,chr17:42550067-42621787	ENSG00000002919.9,SNX11,coding,chr17:43539909-43555104	0.872915
ENSG00000004897.5,CDC27,coding,chr17:42550067-42621787	ENSG00000008294.13,SPAG9,coding,chr17:46394533-46553225	0.872915
ENSG00000004897.5,CDC27,coding,chr17:42550067-42621787	ENSG00000005700.10,IBTK,coding,chr6:82936418-83014190	0.872915
ENSG00000004897.5,CDC27,coding,chr17:42550067-42621787	ENSG00000005955.7,GGNBP2,coding,chr17:31974885-32020391	0.872915
ENSG00000004897.5,CDC27,coding,chr17:42550067-42621787	ENSG00000009844.9,VTA1,coding,chr6:142510059-142583778	0.872915
ENSG00000004897.5,CDC27,coding,chr17:42550067-42621787	ENSG00000122008.11,POLK,coding,chr5:74843336-74932725	0.872915
ENSG00000004897.5,CDC27,coding,chr17:42550067-42621787	ENSG00000001167.10,NFYA,coding,chr6:41148661-41175693	0.872915
ENSG00000004897.5,CDC27,coding,chr17:42550067-42621787	ENSG00000001629.5,ANKIB1,coding,chr7:91713483-91868634	0.872915
ENSG00000004897.5,CDC27,coding,chr17:42550067-42621787	ENSG00000000460.11,C1orf112,coding,chr1:167897868-168089845	0.872915
ENSG00000004897.5,CDC27,coding,chr17:42550067-42621787	ENSG00000003393.10,ALS2,coding,chr2:202273521-202354157	0.872915
ENSG00000004897.5,CDC27,coding,chr17:42550067-42621787	ENSG00000001561.5,ENPP4,coding,chr6:46205659-46222394	0.872915
ENSG00000004897.5,CDC27,coding,chr17:42550067-42621787	ENSG00000000457.8,SCYL3,coding,chr1:168088427-168130032	0.872915
ENSG00000004897.5,CDC27,coding,chr17:42550067-42621787	ENSG00000005156.5,LIG3,coding,chr17:30331654-30356196	0.872915
ENSG00000004897.5,CDC27,coding,chr17:42550067-42621787	ENSG00000004059.5,ARF5,coding,chr7:127015634-127018995	0.872915
ENSG00000004897.5,CDC27,coding,chr17:42550067-42621787	ENSG00000165914.9,TTC7B,coding,chr14:90076684-90352576	0.872915
ENSG00000004897.5,CDC27,coding,chr17:42550067-42621787	ENSG00000001084.6,GCLC,coding,chr6:53470097-53589727	0.872915
ENSG00000004897.5,CDC27,coding,chr17:42550067-42621787	ENSG00000011426.6,ANLN,coding,chr7:36395939-36459925	0.872915
ENSG00000004897.5,CDC27,coding,chr17:42550067-42621787	ENSG00000001631.9,KRIT1,coding,chr7:91666218-91713416	0.872915
ENSG00000004897.5,CDC27,coding,chr17:42550067-42621787	ENSG00000003436.10,TFPI,coding,chr2:188037201-188138732	0.872915
ENSG00000004897.5,CDC27,coding,chr17:42550067-42621787	ENSG00000001036.8,FUCA2,coding,chr6:143858306-143874520	0.872915
ENSG00000004897.5,CDC27,coding,chr17:42550067-42621787	ENSG00000002822.9,MAD1L1,coding,chr7:1821908-2239404	0.872915
ENSG00000004897.5,CDC27,coding,chr17:42550067-42621787	ENSG00000005486.10,RHBDD2,coding,chr7:75309855-75356180	0.872915
ENSG00000004897.5,CDC27,coding,chr17:42550067-42621787	ENSG00000000971.10,CFH,coding,chr1:194887630-194983257	0.872915
ENSG00000004897.5,CDC27,coding,chr17:42550067-42621787	ENSG00000052344.10,PRSS8,coding,chr16:31050256-31054584	0.872915
ENSG00000004897.5,CDC27,coding,chr17:42550067-42621787	ENSG00000005102.8,MEOX1,coding,chr17:39073281-39094848	0.872915
ENSG00000004897.5,CDC27,coding,chr17:42550067-42621787	ENSG00000002726.14,ABP1,coding,chr7:150152647-150189525	0.872915
ENSG00000004897.5,CDC27,coding,chr17:42550067-42621787	ENSG00000001460.12,C1orf201,coding,chr1:24556075-24616011	0.872915
ENSG00000004897.5,CDC27,coding,chr17:42550067-42621787	ENSG00000005884.11,ITGA3,coding,chr17:45488330-45522847	0.872915
ENSG00000004897.5,CDC27,coding,chr17:42550067-42621787	ENSG00000006194.5,ZNF263,coding,chr16:3253800-3281461	0.872915
ENSG00000004897.5,CDC27,coding,chr17:42550067-42621787	ENSG00000000938.7,FGR,coding,chr1:27811161-27834375	0.872915
ENSG00000004897.5,CDC27,coding,chr17:42550067-42621787	ENSG00000013306.10,SLC25A39,coding,chr17:39752518-39757764	0.872915
ENSG00000004897.5,CDC27,coding,chr17:42550067-42621787	ENSG00000080189.9,SLC35C2,coding,chr20:44411573-44426450	0.872915
ENSG00000004897.5,CDC27,coding,chr17:42550067-42621787	ENSG00000132846.5,ZBED3,coding,chr5:76403652-76418904	0.872915
ENSG00000004897.5,CDC27,coding,chr17:42550067-42621787	ENSG00000101938.10,CHRDL1,coding,chrX:109803739-109925942	0.872915
ENSG00000004961.10,HCCS,coding,chrX:11039341-11051119	ENSG00000005302.12,MSL3,coding,chrX:11686198-11703791	0.845343
ENSG00000004961.10,HCCS,coding,chrX:11039341-11051119	ENSG00000130150.6,MOSPD2,coding,chrX:14801483-14850370	0.845343
ENSG00000004961.10,HCCS,coding,chrX:11039341-11051119	ENSG00000012174.7,MBTPS2,coding,chrX:21767674-21813463	0.845343
ENSG00000004961.10,HCCS,coding,chrX:11039341-11051119	ENSG00000005889.10,ZFX,coding,chrX:24077210-24144293	0.845343
ENSG00000004961.10,HCCS,coding,chrX:11039341-11051119	ENSG00000005059.11,CCDC109B,coding,chr4:110700809-110829323	0.845343
ENSG00000004961.10,HCCS,coding,chrX:11039341-11051119	ENSG00000002549.7,LAP3,coding,chr4:17187912-17218693	0.845343
ENSG00000004961.10,HCCS,coding,chrX:11039341-11051119	ENSG00000030110.7,BAK1,coding,chr6:33648301-33656048	0.845343
ENSG00000004961.10,HCCS,coding,chrX:11039341-11051119	ENSG00000066697.10,C9orf30,coding,chr9:102229258-102253332	0.845343
ENSG00000004961.10,HCCS,coding,chrX:11039341-11051119	ENSG00000004455.11,AK2,coding,chr1:33246171-33319184	0.845343
ENSG00000004961.10,HCCS,coding,chrX:11039341-11051119	ENSG00000001497.12,LAS1L,coding,chrX:64649186-64671380	0.845343
ENSG00000004961.10,HCCS,coding,chrX:11039341-11051119	ENSG00000002016.11,RAD52,coding,chr12:891503-970617	0.845343
ENSG00000004961.10,HCCS,coding,chrX:11039341-11051119	ENSG00000010256.6,UQCRC1,coding,chr3:48611438-48623413	0.845343
ENSG00000004961.10,HCCS,coding,chrX:11039341-11051119	ENSG00000004975.6,DVL2,coding,chr17:7069383-7078592	0.845343
ENSG00000004961.10,HCCS,coding,chrX:11039341-11051119	ENSG00000001630.10,CYP51A1,coding,chr7:91579400-91610202	0.845343
ENSG00000004961.10,HCCS,coding,chrX:11039341-11051119	ENSG00000004897.5,CDC27,coding,chr17:42550067-42621787	0.845343
ENSG00000004961.10,HCCS,coding,chrX:11039341-11051119	ENSG00000037241.3,RPL26L1,coding,chr5:172318337-172329380	0.845343
ENSG00000004961.10,HCCS,coding,chrX:11039341-11051119	ENSG00000006042.5,TMEM98,coding,chr17:28279040-28292780	0.845343
ENSG00000004961.10,HCCS,coding,chrX:11039341-11051119	ENSG00000002822.9,MAD1L1,coding,chr7:1821908-2239404	0.845343
ENSG00000004961.10,HCCS,coding,chrX:11039341-11051119	ENSG00000018408.10,WWTR1,coding,chr3:150717711-150937191	0.845343
ENSG00000004961.10,HCCS,coding,chrX:11039341-11051119	ENSG00000001036.8,FUCA2,coding,chr6:143858306-143874520	0.845343
ENSG00000004961.10,HCCS,coding,chrX:11039341-11051119	ENSG00000064886.8,CHI3L2,coding,chr1:111544915-111587585	0.845343
ENSG00000004961.10,HCCS,coding,chrX:11039341-11051119	ENSG00000000457.8,SCYL3,coding,chr1:168088427-168130032	0.845343
ENSG00000004961.10,HCCS,coding,chrX:11039341-11051119	ENSG00000000938.7,FGR,coding,chr1:27811161-27834375	0.845343
ENSG00000004961.10,HCCS,coding,chrX:11039341-11051119	ENSG00000006530.10,AGK,coding,chr7:140897457-141001513	0.845343
ENSG00000004961.10,HCCS,coding,chrX:11039341-11051119	ENSG00000066279.11,ASPM,coding,chr1:195319880-195382447	0.845343
ENSG00000004961.10,HCCS,coding,chrX:11039341-11051119	ENSG00000001167.10,NFYA,coding,chr6:41148661-41175693	0.845343
ENSG00000004961.10,HCCS,coding,chrX:11039341-11051119	ENSG00000001561.5,ENPP4,coding,chr6:46205659-46222394	0.845343
ENSG00000004961.10,HCCS,coding,chrX:11039341-11051119	ENSG00000063244.6,U2AF2,coding,chr19:60857227-60877893	0.845343
ENSG00000004961.10,HCCS,coding,chrX:11039341-11051119	ENSG00000006744.10,ELAC2,coding,chr17:12835654-12862106	0.845343
ENSG00000004961.10,HCCS,coding,chrX:11039341-11051119	ENSG00000099721.9,AMELY,coding,chrY:6793958-6802068	0.845343
ENSG00000004961.10,HCCS,coding,chrX:11039341-11051119	ENSG00000016864.11,GLT8D1,coding,chr3:52703544-52715088	0.845343
ENSG00000004961.10,HCCS,coding,chrX:11039341-11051119	ENSG00000004478.5,FKBP4,coding,chr12:2774379-2784837	0.845343
ENSG00000004975.6,DVL2,coding,chr17:7069383-7078592	ENSG00000129245.6,FXR2,coding,chr17:7435271-7458940	0.883171
ENSG00000004975.6,DVL2,coding,chr17:7069383-7078592	ENSG00000040633.6,PHF23,coding,chr17:7079073-7083549	0.883171
ENSG00000004975.6,DVL2,coding,chr17:7069383-7078592	ENSG00000040531.9,CTNS,coding,chr17:3486510-3511585	0.883171
ENSG00000004975.6,DVL2,coding,chr17:7069383-7078592	ENSG00000170291.7,C17orf81,coding,chr17:7096095-7103974	0.883171
ENSG00000004975.6,DVL2,coding,chr17:7069383-7078592	ENSG00000005100.7,DHX33,coding,chr17:5284955-5312960	0.883171
ENSG00000004975.6,DVL2,coding,chr17:7069383-7078592	ENSG00000007168.5,PAFAH1B1,coding,chr17:2443672-2535659	0.883171
ENSG00000004975.6,DVL2,coding,chr17:7069383-7078592	ENSG00000072778.12,ACADVL,coding,chr17:7061167-7069311	0.883171
ENSG00000004975.6,DVL2,coding,chr17:7069383-7078592	ENSG00000084693.11,AGBL5,coding,chr2:27118735-27146994	0.883171
ENSG00000004975.6,DVL2,coding,chr17:7069383-7078592	ENSG00000004487.10,KDM1A,coding,chr1:23218527-23282769	0.883171
ENSG00000004975.6,DVL2,coding,chr17:7069383-7078592	ENSG00000019485.8,PRDM11,coding,chr11:45072139-45204310	0.883171
ENSG00000004975.6,DVL2,coding,chr17:7069383-7078592	ENSG00000001167.10,NFYA,coding,chr6:41148661-41175693	0.883171
ENSG00000004975.6,DVL2,coding,chr17:7069383-7078592	ENSG00000078246.10,TULP3,coding,chr12:2856649-2920567	0.883171
ENSG00000004975.6,DVL2,coding,chr17:7069383-7078592	ENSG00000002016.11,RAD52,coding,chr12:891503-970617	0.883171
ENSG00000004975.6,DVL2,coding,chr17:7069383-7078592	ENSG00000184863.6,RBM33,coding,chr7:155129905-155266940	0.883171
ENSG00000004975.6,DVL2,coding,chr17:7069383-7078592	ENSG00000000460.11,C1orf112,coding,chr1:167897868-168089845	0.883171
ENSG00000004975.6,DVL2,coding,chr17:7069383-7078592	ENSG00000033030.9,ZCCHC8,coding,chr12:121523369-121551471	0.883171
ENSG00000004975.6,DVL2,coding,chr17:7069383-7078592	ENSG00000006047.7,YBX2,coding,chr17:7132294-7138600	0.883171
ENSG00000004975.6,DVL2,coding,chr17:7069383-7078592	ENSG00000023902.8,PLEKHO1,coding,chr1:148387996-148398884	0.883171
ENSG00000004975.6,DVL2,coding,chr17:7069383-7078592	ENSG00000226913.1,BSN-AS2,lncRNA,chr3:49561742-49566803	0.883171
ENSG00000004975.6,DVL2,coding,chr17:7069383-7078592	ENSG00000004961.10,HCCS,coding,chrX:11039341-11051119	0.883171
ENSG00000004975.6,DVL2,coding,chr17:7069383-7078592	ENSG00000000457.8,SCYL3,coding,chr1:168088427-168130032	0.883171
ENSG00000004975.6,DVL2,coding,chr17:7069383-7078592	ENSG00000054219.9,LY75,coding,chr2:160336607-160469506	0.883171
ENSG00000004975.6,DVL2,coding,chr17:7069383-7078592	ENSG00000092036.12,HAUS4,coding,chr14:22485276-22496210	0.883171
ENSG00000004975.6,DVL2,coding,chr17:7069383-7078592	ENSG00000068878.10,PSME4,coding,chr2:53944707-54051481	0.883171
ENSG00000004975.6,DVL2,coding,chr17:7069383-7078592	ENSG00000004660.9,CAMKK1,coding,chr17:3710357-3743087	0.883171
ENSG00000004975.6,DVL2,coding,chr17:7069383-7078592	ENSG00000001460.12,C1orf201,coding,chr1:24556075-24616011	0.883171
ENSG00000004975.6,DVL2,coding,chr17:7069383-7078592	ENSG00000005249.6,PRKAR2B,coding,chr7:106472329-106589492	0.883171
ENSG00000004975.6,DVL2,coding,chr17:7069383-7078592	ENSG00000003400.10,CASP10,coding,chr2:201755848-201802374	0.883171
ENSG00000004975.6,DVL2,coding,chr17:7069383-7078592	ENSG00000010404.13,IDS,coding,chrX:148371662-148423359	0.883171
ENSG00000004975.6,DVL2,coding,chr17:7069383-7078592	ENSG00000000003.9,TSPAN6,coding,chrX:99770322-99781644	0.883171
ENSG00000004975.6,DVL2,coding,chr17:7069383-7078592	ENSG00000000971.10,CFH,coding,chr1:194887630-194983257	0.883171
ENSG00000004975.6,DVL2,coding,chr17:7069383-7078592	ENSG00000162461.7,SLC25A34,coding,chr1:15935486-15940478	0.883171
ENSG00000004975.6,DVL2,coding,chr17:7069383-7078592	ENSG00000005436.9,GCFC2,coding,chr2:75732633-75791623	0.883171
ENSG00000004975.6,DVL2,coding,chr17:7069383-7078592	ENSG00000135587.4,SMPD2,coding,chr6:109868658-109871815	0.883171
ENSG00000004975.6,DVL2,coding,chr17:7069383-7078592	ENSG00000065320.4,NTN1,coding,chr17:8865583-9088042	0.883171
ENSG00000004975.6,DVL2,coding,chr17:7069383-7078592	ENSG00000005243.4,COPZ2,coding,chr17:43458533-43470138	0.883171
ENSG00000004975.6,DVL2,coding,chr17:7069383-7078592	ENSG00000132466.12,ANKRD17,coding,chr4:74157956-74343379	0.883171
ENSG00000004975.6,DVL2,coding,chr17:7069383-7078592	ENSG00000078237.4,C12orf5,coding,chr12:4300631-4332599	0.883171
ENSG00000004975.6,DVL2,coding,chr17:7069383-7078592	ENSG00000005700.10,IBTK,coding,chr6:82936418-83014190	0.883171
ENSG00000004975.6,DVL2,coding,chr17:7069383-7078592	ENSG00000005801.11,ZNF195,coding,chr11:3317066-3357024	0.883171
ENSG00000004975.6,DVL2,coding,chr17:7069383-7078592	ENSG00000047644.12,WWC3,coding,chrX:9943601-10072518	0.883171
ENSG00000004975.6,DVL2,coding,chr17:7069383-7078592	ENSG00000067057.10,PFKP,coding,chr10:3099711-3169904	0.883171
ENSG00000005007.7,UPF1,coding,chr19:18803743-18840038	ENSG00000105656.4,ELL,coding,chr19:18414474-18493937	0.915239
ENSG00000005007.7,UPF1,coding,chr19:18803743-18840038	ENSG00000105662.9,CRTC1,coding,chr19:18655424-18754142	0.915239
ENSG00000005007.7,UPF1,coding,chr19:18803743-18840038	ENSG00000064607.11,SUGP2,coding,chr19:18962696-19005380	0.915239
ENSG00000005007.7,UPF1,coding,chr19:18803743-18840038	ENSG00000034510.4,TMSB10,coding,chr2:84986259-84987306	0.915239
ENSG00000005007.7,UPF1,coding,chr19:18803743-18840038	ENSG00000006607.8,FARP2,coding,chr2:241944330-242082929	0.915239
ENSG00000005007.7,UPF1,coding,chr19:18803743-18840038	ENSG00000008869.6,HEATR5B,coding,chr2:37049029-37164989	0.915239
ENSG00000005007.7,UPF1,coding,chr19:18803743-18840038	ENSG00000064545.8,TMEM161A,coding,chr19:19090977-19110275	0.915239
ENSG00000005007.7,UPF1,coding,chr19:18803743-18840038	ENSG00000066135.8,KDM4A,coding,chr1:43888415-43943773	0.915239
ENSG00000005007.7,UPF1,coding,chr19:18803743-18840038	ENSG00000115839.12,RAB3GAP1,coding,chr2:135526304-135650434	0.915239
ENSG00000005007.7,UPF1,coding,chr19:18803743-18840038	ENSG00000107581.6,EIF3A,coding,chr10:120784345-120830386	0.915239
ENSG00000005007.7,UPF1,coding,chr19:18803743-18840038	ENSG00000011304.10,PTBP1,coding,chr19:748391-763327	0.915239
ENSG00000005007.7,UPF1,coding,chr19:18803743-18840038	ENSG00000005810.12,MYCBP2,coding,chr13:76516792-76799186	0.915239
ENSG00000005007.7,UPF1,coding,chr19:18803743-18840038	ENSG00000064547.8,LPAR2,coding,chr19:19595467-19600739	0.915239
ENSG00000005007.7,UPF1,coding,chr19:18803743-18840038	ENSG00000105671.6,DDX49,coding,chr19:18891483-18900442	0.915239
ENSG00000005007.7,UPF1,coding,chr19:18803743-18840038	ENSG00000008441.10,NFIX,coding,chr19:12967583-13070610	0.915239
ENSG00000005007.7,UPF1,coding,chr19:18803743-18840038	ENSG00000004139.8,SARM1,coding,chr17:23715504-23752173	0.915239
ENSG00000005007.7,UPF1,coding,chr19:18803743-18840038	ENSG00000008324.6,SS18L2,coding,chr3:42598335-42611610	0.915239
ENSG00000005007.7,UPF1,coding,chr19:18803743-18840038	ENSG00000011454.11,RABGAP1,coding,chr9:124742932-124906966	0.915239
ENSG00000005007.7,UPF1,coding,chr19:18803743-18840038	ENSG00000011376.5,LARS2,coding,chr3:45405001-45565917	0.915239
ENSG00000005007.7,UPF1,coding,chr19:18803743-18840038	ENSG00000008083.8,JARID2,coding,chr6:15353712-15630231	0.915239
ENSG00000005007.7,UPF1,coding,chr19:18803743-18840038	ENSG00000003393.10,ALS2,coding,chr2:202273521-202354157	0.915239
ENSG00000005007.7,UPF1,coding,chr19:18803743-18840038	ENSG00000001461.11,NIPAL3,coding,chr1:24614870-24672053	0.915239
ENSG00000005007.7,UPF1,coding,chr19:18803743-18840038	ENSG00000004399.8,PLXND1,coding,chr3:130756707-130808351	0.915239
ENSG00000005007.7,UPF1,coding,chr19:18803743-18840038	ENSG00000001631.9,KRIT1,coding,chr7:91666218-91713416	0.915239
ENSG00000005007.7,UPF1,coding,chr19:18803743-18840038	ENSG00000004864.8,SLC25A13,coding,chr7:95587467-95789395	0.915239
ENSG00000005007.7,UPF1,coding,chr19:18803743-18840038	ENSG00000001167.10,NFYA,coding,chr6:41148661-41175693	0.915239
ENSG00000005007.7,UPF1,coding,chr19:18803743-18840038	ENSG00000007080.5,CCDC124,coding,chr19:17904823-17915793	0.915239
ENSG00000005007.7,UPF1,coding,chr19:18803743-18840038	ENSG00000000457.8,SCYL3,coding,chr1:168088427-168130032	0.915239
ENSG00000005007.7,UPF1,coding,chr19:18803743-18840038	ENSG00000001497.12,LAS1L,coding,chrX:64649186-64671380	0.915239
ENSG00000005007.7,UPF1,coding,chr19:18803743-18840038	ENSG00000001617.7,SEMA3F,coding,chr3:50167481-50201512	0.915239
ENSG00000005007.7,UPF1,coding,chr19:18803743-18840038	ENSG00000002822.9,MAD1L1,coding,chr7:1821908-2239404	0.915239
ENSG00000005007.7,UPF1,coding,chr19:18803743-18840038	ENSG00000001460.12,C1orf201,coding,chr1:24556075-24616011	0.915239
ENSG00000005007.7,UPF1,coding,chr19:18803743-18840038	ENSG00000060491.10,OGFR,coding,chr20:60906631-60915797	0.915239
ENSG00000005007.7,UPF1,coding,chr19:18803743-18840038	ENSG00000007255.5,TRAPPC6A,coding,chr19:50358026-50373325	0.915239
ENSG00000005007.7,UPF1,coding,chr19:18803743-18840038	ENSG00000003436.10,TFPI,coding,chr2:188037201-188138732	0.915239
ENSG00000005007.7,UPF1,coding,chr19:18803743-18840038	ENSG00000000419.7,DPM1,coding,chr20:48984810-49008499	0.915239
ENSG00000005007.7,UPF1,coding,chr19:18803743-18840038	ENSG00000004866.13,ST7,coding,chr7:116380527-116657393	0.915239
ENSG00000005007.7,UPF1,coding,chr19:18803743-18840038	ENSG00000143621.12,ILF2,coding,chr1:151901135-151910148	0.915239
ENSG00000005007.7,UPF1,coding,chr19:18803743-18840038	ENSG00000105669.6,COPE,coding,chr19:18871322-18891199	0.915239
ENSG00000005007.7,UPF1,coding,chr19:18803743-18840038	ENSG00000007312.7,CD79B,coding,chr17:59359831-59363446	0.915239
ENSG00000005007.7,UPF1,coding,chr19:18803743-18840038	ENSG00000099840.7,IZUMO4,coding,chr19:2047379-2050592	0.915239
ENSG00000005007.7,UPF1,coding,chr19:18803743-18840038	ENSG00000006075.10,CCL3,coding,chr17:31439714-31441628	0.915239
ENSG00000005007.7,UPF1,coding,chr19:18803743-18840038	ENSG00000064961.12,HMG20B,coding,chr19:3523774-3530086	0.915239
ENSG00000005007.7,UPF1,coding,chr19:18803743-18840038	ENSG00000004975.6,DVL2,coding,chr17:7069383-7078592	0.915239
ENSG00000005007.7,UPF1,coding,chr19:18803743-18840038	ENSG00000006015.12,C19orf60,coding,chr19:18560494-18564146	0.915239
ENSG00000005007.7,UPF1,coding,chr19:18803743-18840038	ENSG00000005812.6,FBXL3,coding,chr13:76464740-76499331	0.915239
ENSG00000005007.7,UPF1,coding,chr19:18803743-18840038	ENSG00000066056.7,TIE1,coding,chr1:43539250-43561366	0.915239
ENSG00000005007.7,UPF1,coding,chr19:18803743-18840038	ENSG00000001561.5,ENPP4,coding,chr6:46205659-46222394	0.915239
ENSG00000005007.7,UPF1,coding,chr19:18803743-18840038	ENSG00000151967.14,SCHIP1,coding,chr3:161040343-161097843	0.915239
ENSG00000005007.7,UPF1,coding,chr19:18803743-18840038	ENSG00000117010.11,ZNF684,coding,chr1:40769819-40786428	0.915239
ENSG00000005022.5,SLC25A5,coding,chrX:118486390-118489310	ENSG00000077721.11,UBE2A,coding,chrX:118592528-118602409	0.901048
ENSG00000005022.5,SLC25A5,coding,chrX:118486390-118489310	ENSG00000125356.6,NDUFA1,coding,chrX:118889477-118894653	0.901048
ENSG00000005022.5,SLC25A5,coding,chrX:118486390-118489310	ENSG00000224281.3,SLC25A5-AS1,lncRNA,chrX:118484024-118487089	0.901048
ENSG00000005022.5,SLC25A5,coding,chrX:118486390-118489310	ENSG00000018610.8,CXorf56,coding,chrX:118556139-118583425	0.901048
ENSG00000005022.5,SLC25A5,coding,chrX:118486390-118489310	ENSG00000004779.4,NDUFAB1,coding,chr16:23499823-23515178	0.901048
ENSG00000005022.5,SLC25A5,coding,chrX:118486390-118489310	ENSG00000004961.10,HCCS,coding,chrX:11039341-11051119	0.901048
ENSG00000005022.5,SLC25A5,coding,chrX:118486390-118489310	ENSG00000030110.7,BAK1,coding,chr6:33648301-33656048	0.901048
ENSG00000005022.5,SLC25A5,coding,chrX:118486390-118489310	ENSG00000014641.13,MDH1,coding,chr2:63669246-63687835	0.901048
ENSG00000005022.5,SLC25A5,coding,chrX:118486390-118489310	ENSG00000110955.3,ATP5B,coding,chr12:55318225-55326065	0.901048
ENSG00000005022.5,SLC25A5,coding,chrX:118486390-118489310	ENSG00000004776.5,HSPB6,coding,chr19:40937309-40939770	0.901048
ENSG00000005022.5,SLC25A5,coding,chrX:118486390-118489310	ENSG00000005893.11,LAMP2,coding,chrX:119445709-119487248	0.901048
ENSG00000005022.5,SLC25A5,coding,chrX:118486390-118489310	ENSG00000004455.11,AK2,coding,chr1:33246171-33319184	0.901048
ENSG00000005022.5,SLC25A5,coding,chrX:118486390-118489310	ENSG00000013563.8,DNASE1L1,coding,chrX:153282772-153293643	0.901048
ENSG00000005022.5,SLC25A5,coding,chrX:118486390-118489310	ENSG00000005379.10,BZRAP1,coding,chr17:53733596-53761151	0.901048
ENSG00000005022.5,SLC25A5,coding,chrX:118486390-118489310	ENSG00000060762.13,BRP44L,coding,chr6:166698396-166716476	0.901048
ENSG00000005022.5,SLC25A5,coding,chrX:118486390-118489310	ENSG00000011052.15,NME2,coding,chr17:46585918-46604107	0.901048
ENSG00000005022.5,SLC25A5,coding,chrX:118486390-118489310	ENSG00000101444.7,AHCY,coding,chr20:32331734-32363269	0.901048
ENSG00000005022.5,SLC25A5,coding,chrX:118486390-118489310	ENSG00000002016.11,RAD52,coding,chr12:891503-970617	0.901048
ENSG00000005022.5,SLC25A5,coding,chrX:118486390-118489310	ENSG00000001167.10,NFYA,coding,chr6:41148661-41175693	0.901048
ENSG00000005022.5,SLC25A5,coding,chrX:118486390-118489310	ENSG00000083845.3,RPS5,coding,chr19:63590447-63597982	0.901048
ENSG00000005022.5,SLC25A5,coding,chrX:118486390-118489310	ENSG00000001497.12,LAS1L,coding,chrX:64649186-64671380	0.901048
ENSG00000005022.5,SLC25A5,coding,chrX:118486390-118489310	ENSG00000057608.10,GDI2,coding,chr10:5847191-5924101	0.901048
ENSG00000005022.5,SLC25A5,coding,chrX:118486390-118489310	ENSG00000003393.10,ALS2,coding,chr2:202273521-202354157	0.901048
ENSG00000005022.5,SLC25A5,coding,chrX:118486390-118489310	ENSG00000002549.7,LAP3,coding,chr4:17187912-17218693	0.901048
ENSG00000005022.5,SLC25A5,coding,chrX:118486390-118489310	ENSG00000149635.2,C20orf123,coding,chr20:44602991-44612620	0.901048
ENSG00000005022.5,SLC25A5,coding,chrX:118486390-118489310	ENSG00000002822.9,MAD1L1,coding,chr7:1821908-2239404	0.901048
ENSG00000005022.5,SLC25A5,coding,chrX:118486390-118489310	ENSG00000000419.7,DPM1,coding,chr20:48984810-49008499	0.901048
ENSG00000005022.5,SLC25A5,coding,chrX:118486390-118489310	ENSG00000001631.9,KRIT1,coding,chr7:91666218-91713416	0.901048
ENSG00000005022.5,SLC25A5,coding,chrX:118486390-118489310	ENSG00000001630.10,CYP51A1,coding,chr7:91579400-91610202	0.901048
ENSG00000005022.5,SLC25A5,coding,chrX:118486390-118489310	ENSG00000086589.7,RBM22,coding,chr5:150050548-150060862	0.901048
ENSG00000005022.5,SLC25A5,coding,chrX:118486390-118489310	ENSG00000000003.9,TSPAN6,coding,chrX:99770322-99781644	0.901048
ENSG00000005022.5,SLC25A5,coding,chrX:118486390-118489310	ENSG00000064270.7,ATP2C2,coding,chr16:82959633-83055294	0.901048
ENSG00000005022.5,SLC25A5,coding,chrX:118486390-118489310	ENSG00000005187.7,ACSM3,coding,chr16:20529065-20716404	0.901048
ENSG00000005022.5,SLC25A5,coding,chrX:118486390-118489310	ENSG00000015532.4,XYLT2,coding,chr17:45778451-45795498	0.901048
ENSG00000005022.5,SLC25A5,coding,chrX:118486390-118489310	ENSG00000003056.3,M6PR,coding,chr12:8984225-8993818	0.901048
ENSG00000005022.5,SLC25A5,coding,chrX:118486390-118489310	ENSG00000225439.2,BOLA3-AS1,lncRNA,chr2:74228643-74230696	0.901048
ENSG00000005022.5,SLC25A5,coding,chrX:118486390-118489310	ENSG00000003400.10,CASP10,coding,chr2:201755848-201802374	0.901048
ENSG00000005022.5,SLC25A5,coding,chrX:118486390-118489310	ENSG00000000938.7,FGR,coding,chr1:27811161-27834375	0.901048
ENSG00000005022.5,SLC25A5,coding,chrX:118486390-118489310	ENSG00000021776.6,AQR,coding,chr15:32935023-33049332	0.901048
ENSG00000005022.5,SLC25A5,coding,chrX:118486390-118489310	ENSG00000001084.6,GCLC,coding,chr6:53470097-53589727	0.901048
ENSG00000005022.5,SLC25A5,coding,chrX:118486390-118489310	ENSG00000000971.10,CFH,coding,chr1:194887630-194983257	0.901048
ENSG00000005022.5,SLC25A5,coding,chrX:118486390-118489310	ENSG00000000005.5,TNMD,coding,chrX:99726454-99741538	0.901048
ENSG00000005022.5,SLC25A5,coding,chrX:118486390-118489310	ENSG00000007202.7,KIAA0100,coding,chr17:23965585-23996599	0.901048
ENSG00000005022.5,SLC25A5,coding,chrX:118486390-118489310	ENSG00000092531.5,SNAP23,coding,chr15:40570722-40624839	0.901048
ENSG00000005022.5,SLC25A5,coding,chrX:118486390-118489310	ENSG00000005007.7,UPF1,coding,chr19:18803743-18840038	0.901048
ENSG00000005022.5,SLC25A5,coding,chrX:118486390-118489310	ENSG00000024862.11,CCDC28A,coding,chr6:139136349-139156149	0.901048
ENSG00000005022.5,SLC25A5,coding,chrX:118486390-118489310	ENSG00000006074.3,CCL18,coding,chr17:31415752-31423505	0.901048
ENSG00000005022.5,SLC25A5,coding,chrX:118486390-118489310	ENSG00000023909.5,GCLM,coding,chr1:94123348-94147554	0.901048
ENSG00000005022.5,SLC25A5,coding,chrX:118486390-118489310	ENSG00000010310.3,GIPR,coding,chr19:50863341-50877544	0.901048
ENSG00000005022.5,SLC25A5,coding,chrX:118486390-118489310	ENSG00000005486.10,RHBDD2,coding,chr7:75309855-75356180	0.901048
ENSG00000005022.5,SLC25A5,coding,chrX:118486390-118489310	ENSG00000005175.5,RPAP3,coding,chr12:46343336-46386111	0.901048
ENSG00000005022.5,SLC25A5,coding,chrX:118486390-118489310	ENSG00000108654.5,DDX5,coding,chr17:59924835-59932946	0.901048
ENSG00000005022.5,SLC25A5,coding,chrX:118486390-118489310	ENSG00000132581.2,SDF2,coding,chr17:23999500-24013330	0.901048
ENSG00000005059.11,CCDC109B,coding,chr4:110700809-110829323	ENSG00000010030.9,ETV7,coding,chr6:36430396-36464142	0.803786
ENSG00000005059.11,CCDC109B,coding,chr4:110700809-110829323	ENSG00000002549.7,LAP3,coding,chr4:17187912-17218693	0.803786
ENSG00000005059.11,CCDC109B,coding,chr4:110700809-110829323	ENSG00000007402.7,CACNA2D2,coding,chr3:50375236-50516679	0.803786
ENSG00000005059.11,CCDC109B,coding,chr4:110700809-110829323	ENSG00000138172.6,CALHM2,coding,chr10:105196532-105202650	0.803786
ENSG00000005059.11,CCDC109B,coding,chr4:110700809-110829323	ENSG00000000938.7,FGR,coding,chr1:27811161-27834375	0.803786
ENSG00000005059.11,CCDC109B,coding,chr4:110700809-110829323	ENSG00000109332.15,UBE2D3,coding,chr4:103936216-104009494	0.803786
ENSG00000005059.11,CCDC109B,coding,chr4:110700809-110829323	ENSG00000107099.9,DOCK8,coding,chr9:204853-455259	0.803786
ENSG00000005059.11,CCDC109B,coding,chr4:110700809-110829323	ENSG00000162627.12,SNX7,coding,chr1:98899823-98998644	0.803786
ENSG00000005059.11,CCDC109B,coding,chr4:110700809-110829323	ENSG00000003400.10,CASP10,coding,chr2:201755848-201802374	0.803786
ENSG00000005059.11,CCDC109B,coding,chr4:110700809-110829323	ENSG00000061918.8,GUCY1B3,coding,chr4:156899593-156948193	0.803786
ENSG00000005059.11,CCDC109B,coding,chr4:110700809-110829323	ENSG00000014257.11,ACPP,coding,chr3:133518900-133569832	0.803786
ENSG00000005059.11,CCDC109B,coding,chr4:110700809-110829323	ENSG00000008838.11,MED24,coding,chr17:35428875-35464187	0.803786
ENSG00000005059.11,CCDC109B,coding,chr4:110700809-110829323	ENSG00000010379.10,SLC6A13,coding,chr12:200049-242300	0.803786
ENSG00000005059.11,CCDC109B,coding,chr4:110700809-110829323	ENSG00000089163.4,SIRT4,coding,chr12:119224501-119235435	0.803786
ENSG00000005059.11,CCDC109B,coding,chr4:110700809-110829323	ENSG00000123739.6,PLA2G12A,coding,chr4:110850593-110870682	0.803786
ENSG00000005059.11,CCDC109B,coding,chr4:110700809-110829323	ENSG00000056050.6,C4orf27,coding,chr4:170887190-170915679	0.803786
ENSG00000005059.11,CCDC109B,coding,chr4:110700809-110829323	ENSG00000013523.5,ANGEL1,coding,chr14:76323340-76362342	0.803786
ENSG00000005059.11,CCDC109B,coding,chr4:110700809-110829323	ENSG00000002016.11,RAD52,coding,chr12:891503-970617	0.803786
ENSG00000005059.11,CCDC109B,coding,chr4:110700809-110829323	ENSG00000003137.4,CYP26B1,coding,chr2:72209874-72228675	0.803786
ENSG00000005059.11,CCDC109B,coding,chr4:110700809-110829323	ENSG00000001167.10,NFYA,coding,chr6:41148661-41175693	0.803786
ENSG00000005059.11,CCDC109B,coding,chr4:110700809-110829323	ENSG00000002834.11,LASP1,coding,chr17:34279781-34331549	0.803786
ENSG00000005059.11,CCDC109B,coding,chr4:110700809-110829323	ENSG00000004864.8,SLC25A13,coding,chr7:95587467-95789395	0.803786
ENSG00000005059.11,CCDC109B,coding,chr4:110700809-110829323	ENSG00000064225.8,ST3GAL6,coding,chr3:99933769-100022735	0.803786
ENSG00000005059.11,CCDC109B,coding,chr4:110700809-110829323	ENSG00000006576.11,PHTF2,coding,chr7:77266044-77424754	0.803786
ENSG00000005059.11,CCDC109B,coding,chr4:110700809-110829323	ENSG00000084676.11,NCOA1,coding,chr2:24568286-24847075	0.803786
ENSG00000005059.11,CCDC109B,coding,chr4:110700809-110829323	ENSG00000116793.10,PHTF1,coding,chr1:114036376-114103634	0.803786
ENSG00000005059.11,CCDC109B,coding,chr4:110700809-110829323	ENSG00000000003.9,TSPAN6,coding,chrX:99770322-99781644	0.803786
ENSG00000005059.11,CCDC109B,coding,chr4:110700809-110829323	ENSG00000105404.5,RABAC1,coding,chr19:47152677-47155368	0.803786
ENSG00000005059.11,CCDC109B,coding,chr4:110700809-110829323	ENSG00000001626.8,CFTR,coding,chr7:116893073-117095955	0.803786
ENSG00000005059.11,CCDC109B,coding,chr4:110700809-110829323	ENSG00000001631.9,KRIT1,coding,chr7:91666218-91713416	0.803786
ENSG00000005059.11,CCDC109B,coding,chr4:110700809-110829323	ENSG00000004059.5,ARF5,coding,chr7:127015634-127018995	0.803786
ENSG00000005059.11,CCDC109B,coding,chr4:110700809-110829323	ENSG00000001629.5,ANKIB1,coding,chr7:91713483-91868634	0.803786
ENSG00000005059.11,CCDC109B,coding,chr4:110700809-110829323	ENSG00000004897.5,CDC27,coding,chr17:42550067-42621787	0.803786
ENSG00000005059.11,CCDC109B,coding,chr4:110700809-110829323	ENSG00000047849.17,MAP4,coding,chr3:47867185-48105773	0.803786
ENSG00000005059.11,CCDC109B,coding,chr4:110700809-110829323	ENSG00000066044.8,ELAVL1,coding,chr19:7929457-7976529	0.803786
ENSG00000005059.11,CCDC109B,coding,chr4:110700809-110829323	ENSG00000165272.8,AQP3,coding,chr9:33431151-33437609	0.803786
ENSG00000005075.11,POLR2J,coding,chr7:101900569-101906359	ENSG00000004059.5,ARF5,coding,chr7:127015634-127018995	0.90443
ENSG00000005075.11,POLR2J,coding,chr7:101900569-101906359	ENSG00000232112.3,CCDC72,coding,chr3:48456670-48460620	0.90443
ENSG00000005075.11,POLR2J,coding,chr7:101900569-101906359	ENSG00000106246.9,PTCD1,coding,chr7:98852297-98901756	0.90443
ENSG00000005075.11,POLR2J,coding,chr7:101900569-101906359	ENSG00000008324.6,SS18L2,coding,chr3:42598335-42611610	0.90443
ENSG00000005075.11,POLR2J,coding,chr7:101900569-101906359	ENSG00000106244.8,PDAP1,coding,chr7:98827606-98844388	0.90443
ENSG00000005075.11,POLR2J,coding,chr7:101900569-101906359	ENSG00000034510.4,TMSB10,coding,chr2:84986259-84987306	0.90443
ENSG00000005075.11,POLR2J,coding,chr7:101900569-101906359	ENSG00000133983.9,COX16,coding,chr14:69861854-69896201	0.90443
ENSG00000005075.11,POLR2J,coding,chr7:101900569-101906359	ENSG00000011052.15,NME2,coding,chr17:46585918-46604107	0.90443
ENSG00000005075.11,POLR2J,coding,chr7:101900569-101906359	ENSG00000105819.9,PMPCB,coding,chr7:102725104-102757194	0.90443
ENSG00000005075.11,POLR2J,coding,chr7:101900569-101906359	ENSG00000010818.4,HIVEP2,coding,chr6:143114296-143308031	0.90443
ENSG00000005075.11,POLR2J,coding,chr7:101900569-101906359	ENSG00000008988.5,RPS20,coding,chr8:57142407-57149623	0.90443
ENSG00000005075.11,POLR2J,coding,chr7:101900569-101906359	ENSG00000042753.6,AP2S1,coding,chr19:52033262-52046043	0.90443
ENSG00000005075.11,POLR2J,coding,chr7:101900569-101906359	ENSG00000007080.5,CCDC124,coding,chr19:17904823-17915793	0.90443
ENSG00000005075.11,POLR2J,coding,chr7:101900569-101906359	ENSG00000005486.10,RHBDD2,coding,chr7:75309855-75356180	0.90443
ENSG00000005075.11,POLR2J,coding,chr7:101900569-101906359	ENSG00000103966.5,EHD4,coding,chr15:39978241-40052068	0.90443
ENSG00000005075.11,POLR2J,coding,chr7:101900569-101906359	ENSG00000005700.10,IBTK,coding,chr6:82936418-83014190	0.90443
ENSG00000005075.11,POLR2J,coding,chr7:101900569-101906359	ENSG00000128563.9,PRKRIP1,coding,chr7:101791038-101854128	0.90443
ENSG00000005075.11,POLR2J,coding,chr7:101900569-101906359	ENSG00000002330.8,BAD,coding,chr11:63793877-63808752	0.90443
ENSG00000005075.11,POLR2J,coding,chr7:101900569-101906359	ENSG00000006607.8,FARP2,coding,chr2:241944330-242082929	0.90443
ENSG00000005075.11,POLR2J,coding,chr7:101900569-101906359	ENSG00000003756.11,RBM5,coding,chr3:50101344-50131458	0.90443
ENSG00000005075.11,POLR2J,coding,chr7:101900569-101906359	ENSG00000000457.8,SCYL3,coding,chr1:168088427-168130032	0.90443
ENSG00000005075.11,POLR2J,coding,chr7:101900569-101906359	ENSG00000002834.11,LASP1,coding,chr17:34279781-34331549	0.90443
ENSG00000005075.11,POLR2J,coding,chr7:101900569-101906359	ENSG00000004139.8,SARM1,coding,chr17:23715504-23752173	0.90443
ENSG00000005075.11,POLR2J,coding,chr7:101900569-101906359	ENSG00000000419.7,DPM1,coding,chr20:48984810-49008499	0.90443
ENSG00000005075.11,POLR2J,coding,chr7:101900569-101906359	ENSG00000001167.10,NFYA,coding,chr6:41148661-41175693	0.90443
ENSG00000005075.11,POLR2J,coding,chr7:101900569-101906359	ENSG00000006530.10,AGK,coding,chr7:140897457-141001513	0.90443
ENSG00000005075.11,POLR2J,coding,chr7:101900569-101906359	ENSG00000000971.10,CFH,coding,chr1:194887630-194983257	0.90443
ENSG00000005075.11,POLR2J,coding,chr7:101900569-101906359	ENSG00000099308.4,MAST3,coding,chr19:18069602-18123499	0.90443
ENSG00000005075.11,POLR2J,coding,chr7:101900569-101906359	ENSG00000000938.7,FGR,coding,chr1:27811161-27834375	0.90443
ENSG00000005075.11,POLR2J,coding,chr7:101900569-101906359	ENSG00000003393.10,ALS2,coding,chr2:202273521-202354157	0.90443
ENSG00000005075.11,POLR2J,coding,chr7:101900569-101906359	ENSG00000004660.9,CAMKK1,coding,chr17:3710357-3743087	0.90443
ENSG00000005075.11,POLR2J,coding,chr7:101900569-101906359	ENSG00000014216.9,CAPN1,coding,chr11:64704612-64736053	0.90443
ENSG00000005075.11,POLR2J,coding,chr7:101900569-101906359	ENSG00000100603.8,SNW1,coding,chr14:77253694-77297303	0.90443
ENSG00000005075.11,POLR2J,coding,chr7:101900569-101906359	ENSG00000001084.6,GCLC,coding,chr6:53470097-53589727	0.90443
ENSG00000005075.11,POLR2J,coding,chr7:101900569-101906359	ENSG00000001036.8,FUCA2,coding,chr6:143858306-143874520	0.90443
ENSG00000005075.11,POLR2J,coding,chr7:101900569-101906359	ENSG00000002746.8,HECW1,coding,chr7:43118722-43569463	0.90443
ENSG00000005075.11,POLR2J,coding,chr7:101900569-101906359	ENSG00000002016.11,RAD52,coding,chr12:891503-970617	0.90443
ENSG00000005075.11,POLR2J,coding,chr7:101900569-101906359	ENSG00000004766.11,CCDC132,coding,chr7:92699588-92826274	0.90443
ENSG00000005075.11,POLR2J,coding,chr7:101900569-101906359	ENSG00000006059.3,KRT33A,coding,chr17:36755869-36760590	0.90443
ENSG00000005075.11,POLR2J,coding,chr7:101900569-101906359	ENSG00000005483.13,MLL5,coding,chr7:104441861-104542044	0.90443
ENSG00000005075.11,POLR2J,coding,chr7:101900569-101906359	ENSG00000001629.5,ANKIB1,coding,chr7:91713483-91868634	0.90443
ENSG00000005075.11,POLR2J,coding,chr7:101900569-101906359	ENSG00000005436.9,GCFC2,coding,chr2:75732633-75791623	0.90443
ENSG00000005075.11,POLR2J,coding,chr7:101900569-101906359	ENSG00000077454.10,LRCH4,coding,chr7:100007790-100021712	0.90443
ENSG00000005075.11,POLR2J,coding,chr7:101900569-101906359	ENSG00000003147.13,ICA1,coding,chr7:8119338-8268842	0.90443
ENSG00000005075.11,POLR2J,coding,chr7:101900569-101906359	ENSG00000123268.4,ATF1,coding,chr12:49443759-49501172	0.90443
ENSG00000005075.11,POLR2J,coding,chr7:101900569-101906359	ENSG00000001631.9,KRIT1,coding,chr7:91666218-91713416	0.90443
ENSG00000005100.7,DHX33,coding,chr17:5284955-5312960	ENSG00000029725.10,RABEP1,coding,chr17:5126281-5229853	0.908766
ENSG00000005100.7,DHX33,coding,chr17:5284955-5312960	ENSG00000007168.5,PAFAH1B1,coding,chr17:2443672-2535659	0.908766
ENSG00000005100.7,DHX33,coding,chr17:5284955-5312960	ENSG00000006744.10,ELAC2,coding,chr17:12835654-12862106	0.908766
ENSG00000005100.7,DHX33,coding,chr17:5284955-5312960	ENSG00000004975.6,DVL2,coding,chr17:7069383-7078592	0.908766
ENSG00000005100.7,DHX33,coding,chr17:5284955-5312960	ENSG00000072849.5,DERL2,coding,chr17:5315294-5330261	0.908766
ENSG00000005100.7,DHX33,coding,chr17:5284955-5312960	ENSG00000009413.10,REV3L,coding,chr6:111726926-111911611	0.908766
ENSG00000005100.7,DHX33,coding,chr17:5284955-5312960	ENSG00000003393.10,ALS2,coding,chr2:202273521-202354157	0.908766
ENSG00000005100.7,DHX33,coding,chr17:5284955-5312960	ENSG00000112159.6,MDN1,coding,chr6:90408938-90586163	0.908766
ENSG00000005100.7,DHX33,coding,chr17:5284955-5312960	ENSG00000006695.5,COX10,coding,chr17:13913570-14052719	0.908766
ENSG00000005100.7,DHX33,coding,chr17:5284955-5312960	ENSG00000001167.10,NFYA,coding,chr6:41148661-41175693	0.908766
ENSG00000005100.7,DHX33,coding,chr17:5284955-5312960	ENSG00000108561.3,C1QBP,coding,chr17:5276822-5283195	0.908766
ENSG00000005100.7,DHX33,coding,chr17:5284955-5312960	ENSG00000006125.11,AP2B1,coding,chr17:30938394-31077547	0.908766
ENSG00000005100.7,DHX33,coding,chr17:5284955-5312960	ENSG00000005955.7,GGNBP2,coding,chr17:31974885-32020391	0.908766
ENSG00000005100.7,DHX33,coding,chr17:5284955-5312960	ENSG00000001084.6,GCLC,coding,chr6:53470097-53589727	0.908766
ENSG00000005100.7,DHX33,coding,chr17:5284955-5312960	ENSG00000001631.9,KRIT1,coding,chr7:91666218-91713416	0.908766
ENSG00000005100.7,DHX33,coding,chr17:5284955-5312960	ENSG00000041802.6,LSG1,coding,chr3:195842805-195874495	0.908766
ENSG00000005100.7,DHX33,coding,chr17:5284955-5312960	ENSG00000002016.11,RAD52,coding,chr12:891503-970617	0.908766
ENSG00000005100.7,DHX33,coding,chr17:5284955-5312960	ENSG00000000460.11,C1orf112,coding,chr1:167897868-168089845	0.908766
ENSG00000005100.7,DHX33,coding,chr17:5284955-5312960	ENSG00000105576.9,TNPO2,coding,chr19:12671007-12695810	0.908766
ENSG00000005100.7,DHX33,coding,chr17:5284955-5312960	ENSG00000004660.9,CAMKK1,coding,chr17:3710357-3743087	0.908766
ENSG00000005100.7,DHX33,coding,chr17:5284955-5312960	ENSG00000000457.8,SCYL3,coding,chr1:168088427-168130032	0.908766
ENSG00000005100.7,DHX33,coding,chr17:5284955-5312960	ENSG00000001497.12,LAS1L,coding,chrX:64649186-64671380	0.908766
ENSG00000005100.7,DHX33,coding,chr17:5284955-5312960	ENSG00000065457.5,ADAT1,coding,chr16:74188379-74214699	0.908766
ENSG00000005100.7,DHX33,coding,chr17:5284955-5312960	ENSG00000083099.6,LYRM2,coding,chr6:90334581-90405193	0.908766
ENSG00000005100.7,DHX33,coding,chr17:5284955-5312960	ENSG00000031003.6,FAM13B,coding,chr5:137301547-137415549	0.908766
ENSG00000005100.7,DHX33,coding,chr17:5284955-5312960	ENSG00000001036.8,FUCA2,coding,chr6:143858306-143874520	0.908766
ENSG00000005100.7,DHX33,coding,chr17:5284955-5312960	ENSG00000005001.3,PRSS22,coding,chr16:2842728-2848172	0.908766
ENSG00000005100.7,DHX33,coding,chr17:5284955-5312960	ENSG00000001461.11,NIPAL3,coding,chr1:24614870-24672053	0.908766
ENSG00000005100.7,DHX33,coding,chr17:5284955-5312960	ENSG00000000003.9,TSPAN6,coding,chrX:99770322-99781644	0.908766
ENSG00000005100.7,DHX33,coding,chr17:5284955-5312960	ENSG00000004961.10,HCCS,coding,chrX:11039341-11051119	0.908766
ENSG00000005100.7,DHX33,coding,chr17:5284955-5312960	ENSG00000102316.11,MAGED2,coding,chrX:54850756-54859170	0.908766
ENSG00000005100.7,DHX33,coding,chr17:5284955-5312960	ENSG00000008988.5,RPS20,coding,chr8:57142407-57149623	0.908766
ENSG00000005100.7,DHX33,coding,chr17:5284955-5312960	ENSG00000000971.10,CFH,coding,chr1:194887630-194983257	0.908766
ENSG00000005100.7,DHX33,coding,chr17:5284955-5312960	ENSG00000047621.7,C12orf4,coding,chr12:4467154-4517935	0.908766
ENSG00000005100.7,DHX33,coding,chr17:5284955-5312960	ENSG00000052795.8,FNIP2,coding,chr4:159909739-160048651	0.908766
ENSG00000005100.7,DHX33,coding,chr17:5284955-5312960	ENSG00000037897.12,METTL1,coding,chr12:56448520-56452843	0.908766
ENSG00000005100.7,DHX33,coding,chr17:5284955-5312960	ENSG00000006555.6,TTC22,coding,chr1:55017972-55039528	0.908766
ENSG00000005100.7,DHX33,coding,chr17:5284955-5312960	ENSG00000005486.10,RHBDD2,coding,chr7:75309855-75356180	0.908766
ENSG00000005100.7,DHX33,coding,chr17:5284955-5312960	ENSG00000005249.6,PRKAR2B,coding,chr7:106472329-106589492	0.908766
ENSG00000005100.7,DHX33,coding,chr17:5284955-5312960	ENSG00000066185.8,ZMYND12,coding,chr1:42668586-42694525	0.908766
ENSG00000005100.7,DHX33,coding,chr17:5284955-5312960	ENSG00000035862.6,TIMP2,coding,chr17:74360653-74433064	0.908766
ENSG00000005100.7,DHX33,coding,chr17:5284955-5312960	ENSG00000002919.9,SNX11,coding,chr17:43539909-43555104	0.908766
ENSG00000005100.7,DHX33,coding,chr17:5284955-5312960	ENSG00000005238.13,FAM214B,coding,chr9:35094108-35105999	0.908766
ENSG00000005100.7,DHX33,coding,chr17:5284955-5312960	ENSG00000023445.8,BIRC3,coding,chr11:101693424-101715344	0.908766
ENSG00000005100.7,DHX33,coding,chr17:5284955-5312960	ENSG00000039523.11,FAM65A,coding,chr16:66109821-66138190	0.908766
ENSG00000005156.5,LIG3,coding,chr17:30331654-30356196	ENSG00000092871.11,RFFL,coding,chr17:30357121-30440447	0.876152
ENSG00000005156.5,LIG3,coding,chr17:30331654-30356196	ENSG00000073536.11,NLE1,coding,chr17:30482478-30493435	0.876152
ENSG00000005156.5,LIG3,coding,chr17:30331654-30356196	ENSG00000010244.10,ZNF207,coding,chr17:27701262-27738893	0.876152
ENSG00000005156.5,LIG3,coding,chr17:30331654-30356196	ENSG00000007202.7,KIAA0100,coding,chr17:23965585-23996599	0.876152
ENSG00000005156.5,LIG3,coding,chr17:30331654-30356196	ENSG00000001167.10,NFYA,coding,chr6:41148661-41175693	0.876152
ENSG00000005156.5,LIG3,coding,chr17:30331654-30356196	ENSG00000004487.10,KDM1A,coding,chr1:23218527-23282769	0.876152
ENSG00000005156.5,LIG3,coding,chr17:30331654-30356196	ENSG00000005955.7,GGNBP2,coding,chr17:31974885-32020391	0.876152
ENSG00000005156.5,LIG3,coding,chr17:30331654-30356196	ENSG00000002834.11,LASP1,coding,chr17:34279781-34331549	0.876152
ENSG00000005156.5,LIG3,coding,chr17:30331654-30356196	ENSG00000000457.8,SCYL3,coding,chr1:168088427-168130032	0.876152
ENSG00000005156.5,LIG3,coding,chr17:30331654-30356196	ENSG00000000460.11,C1orf112,coding,chr1:167897868-168089845	0.876152
ENSG00000005156.5,LIG3,coding,chr17:30331654-30356196	ENSG00000078246.10,TULP3,coding,chr12:2856649-2920567	0.876152
ENSG00000005156.5,LIG3,coding,chr17:30331654-30356196	ENSG00000002016.11,RAD52,coding,chr12:891503-970617	0.876152
ENSG00000005156.5,LIG3,coding,chr17:30331654-30356196	ENSG00000004897.5,CDC27,coding,chr17:42550067-42621787	0.876152
ENSG00000005156.5,LIG3,coding,chr17:30331654-30356196	ENSG00000004139.8,SARM1,coding,chr17:23715504-23752173	0.876152
ENSG00000005156.5,LIG3,coding,chr17:30331654-30356196	ENSG00000005379.10,BZRAP1,coding,chr17:53733596-53761151	0.876152
ENSG00000005156.5,LIG3,coding,chr17:30331654-30356196	ENSG00000044446.6,PHKA2,coding,chrX:18820338-18912637	0.876152
ENSG00000005156.5,LIG3,coding,chr17:30331654-30356196	ENSG00000005381.5,MPO,coding,chr17:53702215-53713295	0.876152
ENSG00000005156.5,LIG3,coding,chr17:30331654-30356196	ENSG00000005187.7,ACSM3,coding,chr16:20529065-20716404	0.876152
ENSG00000005156.5,LIG3,coding,chr17:30331654-30356196	ENSG00000001460.12,C1orf201,coding,chr1:24556075-24616011	0.876152
ENSG00000005156.5,LIG3,coding,chr17:30331654-30356196	ENSG00000001084.6,GCLC,coding,chr6:53470097-53589727	0.876152
ENSG00000005156.5,LIG3,coding,chr17:30331654-30356196	ENSG00000102007.6,PLP2,coding,chrX:48915216-48918532	0.876152
ENSG00000005156.5,LIG3,coding,chr17:30331654-30356196	ENSG00000066629.11,EML1,coding,chr14:99273782-99478150	0.876152
ENSG00000005156.5,LIG3,coding,chr17:30331654-30356196	ENSG00000001617.7,SEMA3F,coding,chr3:50167481-50201512	0.876152
ENSG00000005156.5,LIG3,coding,chr17:30331654-30356196	ENSG00000084093.10,REST,coding,chr4:57468798-57508334	0.876152
ENSG00000005156.5,LIG3,coding,chr17:30331654-30356196	ENSG00000000003.9,TSPAN6,coding,chrX:99770322-99781644	0.876152
ENSG00000005156.5,LIG3,coding,chr17:30331654-30356196	ENSG00000001497.12,LAS1L,coding,chrX:64649186-64671380	0.876152
ENSG00000005156.5,LIG3,coding,chr17:30331654-30356196	ENSG00000005020.7,SKAP2,coding,chr7:26673205-27001383	0.876152
ENSG00000005156.5,LIG3,coding,chr17:30331654-30356196	ENSG00000010404.13,IDS,coding,chrX:148371662-148423359	0.876152
ENSG00000005156.5,LIG3,coding,chr17:30331654-30356196	ENSG00000010256.6,UQCRC1,coding,chr3:48611438-48623413	0.876152
ENSG00000005156.5,LIG3,coding,chr17:30331654-30356196	ENSG00000003756.11,RBM5,coding,chr3:50101344-50131458	0.876152
ENSG00000005156.5,LIG3,coding,chr17:30331654-30356196	ENSG00000071967.7,CYBRD1,coding,chr2:172087002-172122889	0.876152
ENSG00000005156.5,LIG3,coding,chr17:30331654-30356196	ENSG00000000938.7,FGR,coding,chr1:27811161-27834375	0.876152
ENSG00000005156.5,LIG3,coding,chr17:30331654-30356196	ENSG00000003400.10,CASP10,coding,chr2:201755848-201802374	0.876152
ENSG00000005156.5,LIG3,coding,chr17:30331654-30356196	ENSG00000037749.7,MFAP3,coding,chr5:153398658-153580231	0.876152
ENSG00000005156.5,LIG3,coding,chr17:30331654-30356196	ENSG00000006555.6,TTC22,coding,chr1:55017972-55039528	0.876152
ENSG00000005156.5,LIG3,coding,chr17:30331654-30356196	ENSG00000021645.12,NRXN3,coding,chr14:77778486-79400515	0.876152
ENSG00000005156.5,LIG3,coding,chr17:30331654-30356196	ENSG00000000971.10,CFH,coding,chr1:194887630-194983257	0.876152
ENSG00000005156.5,LIG3,coding,chr17:30331654-30356196	ENSG00000005812.6,FBXL3,coding,chr13:76464740-76499331	0.876152
ENSG00000005156.5,LIG3,coding,chr17:30331654-30356196	ENSG00000261428.1,RP11-16P6.1.1,lncRNA,chr2:223139867-223142682	0.876152
ENSG00000005156.5,LIG3,coding,chr17:30331654-30356196	ENSG00000008952.10,SEC62,coding,chr3:171167116-171198855	0.876152
ENSG00000005156.5,LIG3,coding,chr17:30331654-30356196	ENSG00000017621.11,MAGIX,coding,chrX:48906004-48911766	0.876152
ENSG00000005156.5,LIG3,coding,chr17:30331654-30356196	ENSG00000005238.13,FAM214B,coding,chr9:35094108-35105999	0.876152
ENSG00000005156.5,LIG3,coding,chr17:30331654-30356196	ENSG00000073712.9,FERMT2,coding,chr14:52393735-52488903	0.876152
ENSG00000005156.5,LIG3,coding,chr17:30331654-30356196	ENSG00000012963.8,UBR7,coding,chr14:92743153-92765314	0.876152
ENSG00000005156.5,LIG3,coding,chr17:30331654-30356196	ENSG00000071462.7,WBSCR22,coding,chr7:72735290-72757427	0.876152
ENSG00000005156.5,LIG3,coding,chr17:30331654-30356196	ENSG00000006740.10,ARHGAP44,coding,chr17:12633553-12835685	0.876152
ENSG00000005156.5,LIG3,coding,chr17:30331654-30356196	ENSG00000100106.14,TRIOBP,coding,chr22:36422956-36502509	0.876152
ENSG00000005175.5,RPAP3,coding,chr12:46343336-46386111	ENSG00000079387.9,SENP1,coding,chr12:46722947-46786358	0.815938
ENSG00000005175.5,RPAP3,coding,chr12:46343336-46386111	ENSG00000015153.10,YAF2,coding,chr12:40837172-40918418	0.815938
ENSG00000005175.5,RPAP3,coding,chr12:46343336-46386111	ENSG00000066084.7,DIP2B,coding,chr12:49185034-49428717	0.815938
ENSG00000005175.5,RPAP3,coding,chr12:46343336-46386111	ENSG00000050438.9,SLC4A8,coding,chr12:50071367-50189247	0.815938
ENSG00000005175.5,RPAP3,coding,chr12:46343336-46386111	ENSG00000005955.7,GGNBP2,coding,chr17:31974885-32020391	0.815938
ENSG00000005175.5,RPAP3,coding,chr12:46343336-46386111	ENSG00000000460.11,C1orf112,coding,chr1:167897868-168089845	0.815938
ENSG00000005175.5,RPAP3,coding,chr12:46343336-46386111	ENSG00000117528.7,ABCD3,coding,chr1:94656520-94756810	0.815938
ENSG00000005175.5,RPAP3,coding,chr12:46343336-46386111	ENSG00000006530.10,AGK,coding,chr7:140897457-141001513	0.815938
ENSG00000005175.5,RPAP3,coding,chr12:46343336-46386111	ENSG00000003509.11,C2orf56,coding,chr2:37312277-37334050	0.815938
ENSG00000005175.5,RPAP3,coding,chr12:46343336-46386111	ENSG00000001036.8,FUCA2,coding,chr6:143858306-143874520	0.815938
ENSG00000005175.5,RPAP3,coding,chr12:46343336-46386111	ENSG00000051341.8,POLQ,coding,chr3:122632963-122748178	0.815938
ENSG00000005175.5,RPAP3,coding,chr12:46343336-46386111	ENSG00000005189.14,AC004381.6.1,coding,chr16:20725251-20768491	0.815938
ENSG00000005175.5,RPAP3,coding,chr12:46343336-46386111	ENSG00000000457.8,SCYL3,coding,chr1:168088427-168130032	0.815938
ENSG00000005175.5,RPAP3,coding,chr12:46343336-46386111	ENSG00000001629.5,ANKIB1,coding,chr7:91713483-91868634	0.815938
ENSG00000005175.5,RPAP3,coding,chr12:46343336-46386111	ENSG00000001084.6,GCLC,coding,chr6:53470097-53589727	0.815938
ENSG00000005175.5,RPAP3,coding,chr12:46343336-46386111	ENSG00000061273.12,HDAC7,coding,chr12:46462771-46513182	0.815938
ENSG00000005175.5,RPAP3,coding,chr12:46343336-46386111	ENSG00000007255.5,TRAPPC6A,coding,chr19:50358026-50373325	0.815938
ENSG00000005175.5,RPAP3,coding,chr12:46343336-46386111	ENSG00000000003.9,TSPAN6,coding,chrX:99770322-99781644	0.815938
ENSG00000005175.5,RPAP3,coding,chr12:46343336-46386111	ENSG00000011132.6,APBA3,coding,chr19:3701770-3712673	0.815938
ENSG00000005175.5,RPAP3,coding,chr12:46343336-46386111	ENSG00000010295.13,IFFO1,coding,chr12:6517801-6535500	0.815938
ENSG00000005175.5,RPAP3,coding,chr12:46343336-46386111	ENSG00000012822.9,CALCOCO1,coding,chr12:52391168-52407796	0.815938
ENSG00000005175.5,RPAP3,coding,chr12:46343336-46386111	ENSG00000000419.7,DPM1,coding,chr20:48984810-49008499	0.815938
ENSG00000005175.5,RPAP3,coding,chr12:46343336-46386111	ENSG00000037897.12,METTL1,coding,chr12:56448520-56452843	0.815938
ENSG00000005175.5,RPAP3,coding,chr12:46343336-46386111	ENSG00000023330.9,ALAS1,coding,chr3:52207141-52223383	0.815938
ENSG00000005175.5,RPAP3,coding,chr12:46343336-46386111	ENSG00000013563.8,DNASE1L1,coding,chrX:153282772-153293643	0.815938
ENSG00000005175.5,RPAP3,coding,chr12:46343336-46386111	ENSG00000002726.14,ABP1,coding,chr7:150152647-150189525	0.815938
ENSG00000005175.5,RPAP3,coding,chr12:46343336-46386111	ENSG00000047056.10,WDR37,coding,chr10:1085477-1168237	0.815938
ENSG00000005175.5,RPAP3,coding,chr12:46343336-46386111	ENSG00000001460.12,C1orf201,coding,chr1:24556075-24616011	0.815938
ENSG00000005175.5,RPAP3,coding,chr12:46343336-46386111	ENSG00000153814.7,JAZF1,coding,chr7:27836716-28186887	0.815938
ENSG00000005175.5,RPAP3,coding,chr12:46343336-46386111	ENSG00000005108.8,THSD7A,coding,chr7:11376588-11838349	0.815938
ENSG00000005175.5,RPAP3,coding,chr12:46343336-46386111	ENSG00000073598.3,FNDC8,coding,chr17:30472762-30481864	0.815938
ENSG00000005175.5,RPAP3,coding,chr12:46343336-46386111	ENSG00000003756.11,RBM5,coding,chr3:50101344-50131458	0.815938
ENSG00000005175.5,RPAP3,coding,chr12:46343336-46386111	ENSG00000092067.5,CEBPE,coding,chr14:22656352-22658665	0.815938
ENSG00000005175.5,RPAP3,coding,chr12:46343336-46386111	ENSG00000082684.9,SEMA5B,coding,chr3:124110730-124230142	0.815938
ENSG00000005175.5,RPAP3,coding,chr12:46343336-46386111	ENSG00000001630.10,CYP51A1,coding,chr7:91579400-91610202	0.815938
ENSG00000005175.5,RPAP3,coding,chr12:46343336-46386111	ENSG00000058262.5,SEC61A1,coding,chr3:129253173-129273216	0.815938
ENSG00000005194.10,CIAPIN1,coding,chr16:56019581-56038941	ENSG00000102978.8,POLR2C,coding,chr16:56053799-56063423	0.909424
ENSG00000005194.10,CIAPIN1,coding,chr16:56019581-56038941	ENSG00000088682.9,COQ9,coding,chr16:56038837-56052688	0.909424
ENSG00000005194.10,CIAPIN1,coding,chr16:56019581-56038941	ENSG00000070761.3,C16orf80,coding,chr16:56704996-56720855	0.909424
ENSG00000005194.10,CIAPIN1,coding,chr16:56019581-56038941	ENSG00000102931.3,ARL2BP,coding,chr16:55836510-55845017	0.909424
ENSG00000005194.10,CIAPIN1,coding,chr16:56019581-56038941	ENSG00000102900.7,NUP93,coding,chr16:55321517-55438293	0.909424
ENSG00000005194.10,CIAPIN1,coding,chr16:56019581-56038941	ENSG00000070770.3,CSNK2A2,coding,chr16:56749311-56789325	0.909424
ENSG00000005194.10,CIAPIN1,coding,chr16:56019581-56038941	ENSG00000069345.6,DNAJA2,coding,chr16:45546799-45565200	0.909424
ENSG00000005194.10,CIAPIN1,coding,chr16:56019581-56038941	ENSG00000034713.3,GABARAPL2,coding,chr16:74157749-74169280	0.909424
ENSG00000005194.10,CIAPIN1,coding,chr16:56019581-56038941	ENSG00000051108.10,HERPUD1,coding,chr16:55523460-55535299	0.909424
ENSG00000005194.10,CIAPIN1,coding,chr16:56019581-56038941	ENSG00000038358.9,EDC4,coding,chr16:66464475-66475907	0.909424
ENSG00000005194.10,CIAPIN1,coding,chr16:56019581-56038941	ENSG00000003249.8,DBNDD1,coding,chr16:88598773-88614037	0.909424
ENSG00000005194.10,CIAPIN1,coding,chr16:56019581-56038941	ENSG00000004779.4,NDUFAB1,coding,chr16:23499823-23515178	0.909424
ENSG00000005194.10,CIAPIN1,coding,chr16:56019581-56038941	ENSG00000068489.7,PRR11,coding,chr17:54587882-54634706	0.909424
ENSG00000005194.10,CIAPIN1,coding,chr16:56019581-56038941	ENSG00000005022.5,SLC25A5,coding,chrX:118486390-118489310	0.909424
ENSG00000005194.10,CIAPIN1,coding,chr16:56019581-56038941	ENSG00000105643.3,ARRDC2,coding,chr19:17972943-17985903	0.909424
ENSG00000005194.10,CIAPIN1,coding,chr16:56019581-56038941	ENSG00000000419.7,DPM1,coding,chr20:48984810-49008499	0.909424
ENSG00000005194.10,CIAPIN1,coding,chr16:56019581-56038941	ENSG00000093100.12,XXbac-B461K10.4.1,coding,chr22:16650417-16887325	0.909424
ENSG00000005194.10,CIAPIN1,coding,chr16:56019581-56038941	ENSG00000008405.6,CRY1,coding,chr12:105909271-106011737	0.909424
ENSG00000005194.10,CIAPIN1,coding,chr16:56019581-56038941	ENSG00000006555.6,TTC22,coding,chr1:55017972-55039528	0.909424
ENSG00000005194.10,CIAPIN1,coding,chr16:56019581-56038941	ENSG00000000457.8,SCYL3,coding,chr1:168088427-168130032	0.909424
ENSG00000005194.10,CIAPIN1,coding,chr16:56019581-56038941	ENSG00000066336.7,SPI1,coding,chr11:47332986-47356703	0.909424
ENSG00000005194.10,CIAPIN1,coding,chr16:56019581-56038941	ENSG00000069974.10,RAB27A,coding,chr15:53282455-53398603	0.909424
ENSG00000005194.10,CIAPIN1,coding,chr16:56019581-56038941	ENSG00000000003.9,TSPAN6,coding,chrX:99770322-99781644	0.909424
ENSG00000005194.10,CIAPIN1,coding,chr16:56019581-56038941	ENSG00000035141.3,FAM136A,coding,chr2:70376610-70382726	0.909424
ENSG00000005194.10,CIAPIN1,coding,chr16:56019581-56038941	ENSG00000053254.11,FOXN3,coding,chr14:88660967-89155246	0.909424
ENSG00000005194.10,CIAPIN1,coding,chr16:56019581-56038941	ENSG00000006210.6,CX3CL1,coding,chr16:55963870-55976461	0.909424
ENSG00000005194.10,CIAPIN1,coding,chr16:56019581-56038941	ENSG00000071203.5,MS4A12,coding,chr11:60016826-60031479	0.909424
ENSG00000005194.10,CIAPIN1,coding,chr16:56019581-56038941	ENSG00000051382.4,PIK3CB,coding,chr3:139855549-140036470	0.909424
ENSG00000005194.10,CIAPIN1,coding,chr16:56019581-56038941	ENSG00000074800.8,ENO1,coding,chr1:8843647-8861895	0.909424
ENSG00000005194.10,CIAPIN1,coding,chr16:56019581-56038941	ENSG00000059145.13,UNKL,coding,chr16:1353206-1404753	0.909424
ENSG00000005194.10,CIAPIN1,coding,chr16:56019581-56038941	ENSG00000079819.10,EPB41L2,coding,chr6:131202179-131426155	0.909424
ENSG00000005194.10,CIAPIN1,coding,chr16:56019581-56038941	ENSG00000089154.6,GCN1L1,coding,chr12:119049389-119116896	0.909424
ENSG00000005194.10,CIAPIN1,coding,chr16:56019581-56038941	ENSG00000146281.5,PM20D2,coding,chr6:89912487-89932003	0.909424
ENSG00000005194.10,CIAPIN1,coding,chr16:56019581-56038941	ENSG00000101916.11,TLR8,coding,chrX:12834659-12851209	0.909424
ENSG00000005194.10,CIAPIN1,coding,chr16:56019581-56038941	ENSG00000101134.7,DOK5,coding,chr20:52525542-52701117	0.909424
ENSG00000005194.10,CIAPIN1,coding,chr16:56019581-56038941	ENSG00000108523.10,RNF167,coding,chr17:4784167-4789263	0.909424
ENSG00000005194.10,CIAPIN1,coding,chr16:56019581-56038941	ENSG00000143314.8,MRPL24,coding,chr1:154973718-154978006	0.909424
ENSG00000005206.9,AC004410.1,coding,chr19:2279628-2306099	ENSG00000071655.9,MBD3,coding,chr19:1527677-1543710	0.903088
ENSG00000005206.9,AC004410.1,coding,chr19:2279628-2306099	ENSG00000125912.5,NCLN,coding,chr19:3136874-3160572	0.903088
ENSG00000005206.9,AC004410.1,coding,chr19:2279628-2306099	ENSG00000065000.9,AP3D1,coding,chr19:2051992-2102556	0.903088
ENSG00000005206.9,AC004410.1,coding,chr19:2279628-2306099	ENSG00000104897.3,SF3A2,coding,chr19:2187815-2199677	0.903088
ENSG00000005206.9,AC004410.1,coding,chr19:2279628-2306099	ENSG00000178297.7,TMPRSS9,coding,chr19:2340768-2377086	0.903088
ENSG00000005206.9,AC004410.1,coding,chr19:2279628-2306099	ENSG00000011132.6,APBA3,coding,chr19:3701770-3712673	0.903088
ENSG00000005206.9,AC004410.1,coding,chr19:2279628-2306099	ENSG00000065268.3,WDR18,coding,chr19:935327-945569	0.903088
ENSG00000005206.9,AC004410.1,coding,chr19:2279628-2306099	ENSG00000011304.10,PTBP1,coding,chr19:748391-763327	0.903088
ENSG00000005206.9,AC004410.1,coding,chr19:2279628-2306099	ENSG00000064687.7,ABCA7,coding,chr19:991101-1016571	0.903088
ENSG00000005206.9,AC004410.1,coding,chr19:2279628-2306099	ENSG00000104936.9,DMPK,coding,chr19:50964817-50977655	0.903088
ENSG00000005206.9,AC004410.1,coding,chr19:2279628-2306099	ENSG00000011376.5,LARS2,coding,chr3:45405001-45565917	0.903088
ENSG00000005206.9,AC004410.1,coding,chr19:2279628-2306099	ENSG00000099800.2,TIMM13,coding,chr19:2376629-2378875	0.903088
ENSG00000005206.9,AC004410.1,coding,chr19:2279628-2306099	ENSG00000004777.10,ARHGAP33,coding,chr19:40958256-40971564	0.903088
ENSG00000005206.9,AC004410.1,coding,chr19:2279628-2306099	ENSG00000008382.10,MPND,coding,chr19:4294523-4311082	0.903088
ENSG00000005206.9,AC004410.1,coding,chr19:2279628-2306099	ENSG00000100258.12,LMF2,coding,chr22:49288241-49293001	0.903088
ENSG00000005206.9,AC004410.1,coding,chr19:2279628-2306099	ENSG00000003393.10,ALS2,coding,chr2:202273521-202354157	0.903088
ENSG00000005206.9,AC004410.1,coding,chr19:2279628-2306099	ENSG00000005882.6,PDK2,coding,chr17:45527099-45544515	0.903088
ENSG00000005206.9,AC004410.1,coding,chr19:2279628-2306099	ENSG00000038274.10,MAT2B,coding,chr5:162862697-162878920	0.903088
ENSG00000005206.9,AC004410.1,coding,chr19:2279628-2306099	ENSG00000006282.12,SPATA20,coding,chr17:45975417-45988212	0.903088
ENSG00000005206.9,AC004410.1,coding,chr19:2279628-2306099	ENSG00000001460.12,C1orf201,coding,chr1:24556075-24616011	0.903088
ENSG00000005206.9,AC004410.1,coding,chr19:2279628-2306099	ENSG00000100156.6,SLC16A8,coding,chr22:36804086-36810046	0.903088
ENSG00000005206.9,AC004410.1,coding,chr19:2279628-2306099	ENSG00000100142.8,POLR2F,coding,chr22:36678559-36767059	0.903088
ENSG00000005206.9,AC004410.1,coding,chr19:2279628-2306099	ENSG00000115520.4,COQ10B,coding,chr2:198026391-198048277	0.903088
ENSG00000005206.9,AC004410.1,coding,chr19:2279628-2306099	ENSG00000110700.2,RPS13,coding,chr11:17052511-17055910	0.903088
ENSG00000005206.9,AC004410.1,coding,chr19:2279628-2306099	ENSG00000008988.5,RPS20,coding,chr8:57142407-57149623	0.903088
ENSG00000005206.9,AC004410.1,coding,chr19:2279628-2306099	ENSG00000007376.3,RPUSD1,coding,chr16:774974-778398	0.903088
ENSG00000005206.9,AC004410.1,coding,chr19:2279628-2306099	ENSG00000001617.7,SEMA3F,coding,chr3:50167481-50201512	0.903088
ENSG00000005206.9,AC004410.1,coding,chr19:2279628-2306099	ENSG00000010282.9,HHATL,coding,chr3:42709158-42719323	0.903088
ENSG00000005206.9,AC004410.1,coding,chr19:2279628-2306099	ENSG00000110628.9,SLC22A18,coding,chr11:2877526-2903052	0.903088
ENSG00000005206.9,AC004410.1,coding,chr19:2279628-2306099	ENSG00000001497.12,LAS1L,coding,chrX:64649186-64671380	0.903088
ENSG00000005206.9,AC004410.1,coding,chr19:2279628-2306099	ENSG00000105792.15,C7orf63,coding,chr7:89712423-89778313	0.903088
ENSG00000005206.9,AC004410.1,coding,chr19:2279628-2306099	ENSG00000229214.1,LINC00242,lncRNA,chr6:169930810-169940846	0.903088
ENSG00000005206.9,AC004410.1,coding,chr19:2279628-2306099	ENSG00000005059.11,CCDC109B,coding,chr4:110700809-110829323	0.903088
ENSG00000005206.9,AC004410.1,coding,chr19:2279628-2306099	ENSG00000006638.6,TBXA2R,coding,chr19:3545503-3557831	0.903088
ENSG00000005206.9,AC004410.1,coding,chr19:2279628-2306099	ENSG00000092010.10,PSME1,coding,chr14:23675206-23678016	0.903088
ENSG00000005206.9,AC004410.1,coding,chr19:2279628-2306099	ENSG00000005238.13,FAM214B,coding,chr9:35094108-35105999	0.903088
ENSG00000005206.9,AC004410.1,coding,chr19:2279628-2306099	ENSG00000050426.9,LETMD1,coding,chr12:49728011-49740474	0.903088
ENSG00000005206.9,AC004410.1,coding,chr19:2279628-2306099	ENSG00000069974.10,RAB27A,coding,chr15:53282455-53398603	0.903088
ENSG00000005206.9,AC004410.1,coding,chr19:2279628-2306099	ENSG00000034239.5,EFCAB1,coding,chr8:49785900-49810423	0.903088
ENSG00000005206.9,AC004410.1,coding,chr19:2279628-2306099	ENSG00000121073.7,SLC35B1,coding,chr17:45133303-45141375	0.903088
ENSG00000005206.9,AC004410.1,coding,chr19:2279628-2306099	ENSG00000004799.6,PDK4,coding,chr7:95050746-95063764	0.903088
ENSG00000005206.9,AC004410.1,coding,chr19:2279628-2306099	ENSG00000005436.9,GCFC2,coding,chr2:75732633-75791623	0.903088
ENSG00000005206.9,AC004410.1,coding,chr19:2279628-2306099	ENSG00000133794.12,ARNTL,coding,chr11:13254774-13365389	0.903088
ENSG00000005206.9,AC004410.1,coding,chr19:2279628-2306099	ENSG00000145414.4,NAF1,coding,chr4:164250674-164307523	0.903088
ENSG00000005206.9,AC004410.1,coding,chr19:2279628-2306099	ENSG00000004700.11,RECQL,coding,chr12:21513111-21545870	0.903088
ENSG00000005206.9,AC004410.1,coding,chr19:2279628-2306099	ENSG00000003509.11,C2orf56,coding,chr2:37312277-37334050	0.903088
ENSG00000005206.9,AC004410.1,coding,chr19:2279628-2306099	ENSG00000076248.4,UNG,coding,chr12:108019761-108033180	0.903088
ENSG00000005206.9,AC004410.1,coding,chr19:2279628-2306099	ENSG00000011405.8,PIK3C2A,coding,chr11:17055852-17186106	0.903088
ENSG00000005238.13,FAM214B,coding,chr9:35094108-35105999	ENSG00000107140.9,TESK1,coding,chr9:35595280-35600038	0.854572
ENSG00000005238.13,FAM214B,coding,chr9:35094108-35105999	ENSG00000070610.10,GBA2,coding,chr9:35726862-35739983	0.854572
ENSG00000005238.13,FAM214B,coding,chr9:35094108-35105999	ENSG00000086062.7,B4GALT1,coding,chr9:33094079-33157354	0.854572
ENSG00000005238.13,FAM214B,coding,chr9:35094108-35105999	ENSG00000000938.7,FGR,coding,chr1:27811161-27834375	0.854572
ENSG00000005238.13,FAM214B,coding,chr9:35094108-35105999	ENSG00000011201.6,KAL1,coding,chrX:8456914-8660227	0.854572
ENSG00000005238.13,FAM214B,coding,chr9:35094108-35105999	ENSG00000006114.10,SYNRG,coding,chr17:32949012-33043601	0.854572
ENSG00000005238.13,FAM214B,coding,chr9:35094108-35105999	ENSG00000077348.3,EXOSC5,coding,chr19:46584120-46595096	0.854572
ENSG00000005238.13,FAM214B,coding,chr9:35094108-35105999	ENSG00000000971.10,CFH,coding,chr1:194887630-194983257	0.854572
ENSG00000005238.13,FAM214B,coding,chr9:35094108-35105999	ENSG00000013364.13,MVP,coding,chr16:29736060-29766856	0.854572
ENSG00000005238.13,FAM214B,coding,chr9:35094108-35105999	ENSG00000012822.9,CALCOCO1,coding,chr12:52391168-52407796	0.854572
ENSG00000005238.13,FAM214B,coding,chr9:35094108-35105999	ENSG00000075624.8,ACTB,coding,chr7:5533307-5569941	0.854572
ENSG00000005238.13,FAM214B,coding,chr9:35094108-35105999	ENSG00000048545.8,GUCA1A,coding,chr6:42231121-42255772	0.854572
ENSG00000005238.13,FAM214B,coding,chr9:35094108-35105999	ENSG00000005884.11,ITGA3,coding,chr17:45488330-45522847	0.854572
ENSG00000005238.13,FAM214B,coding,chr9:35094108-35105999	ENSG00000004534.9,RBM6,coding,chr3:49952443-50112482	0.854572
ENSG00000005238.13,FAM214B,coding,chr9:35094108-35105999	ENSG00000002919.9,SNX11,coding,chr17:43539909-43555104	0.854572
ENSG00000005238.13,FAM214B,coding,chr9:35094108-35105999	ENSG00000003137.4,CYP26B1,coding,chr2:72209874-72228675	0.854572
ENSG00000005238.13,FAM214B,coding,chr9:35094108-35105999	ENSG00000109458.4,GAB1,coding,chr4:144477364-144615171	0.854572
ENSG00000005238.13,FAM214B,coding,chr9:35094108-35105999	ENSG00000004478.5,FKBP4,coding,chr12:2774379-2784837	0.854572
ENSG00000005238.13,FAM214B,coding,chr9:35094108-35105999	ENSG00000007047.8,MARK4,coding,chr19:50446389-50500381	0.854572
ENSG00000005238.13,FAM214B,coding,chr9:35094108-35105999	ENSG00000003393.10,ALS2,coding,chr2:202273521-202354157	0.854572
ENSG00000005238.13,FAM214B,coding,chr9:35094108-35105999	ENSG00000019102.7,VSIG2,coding,chr11:124122577-124127344	0.854572
ENSG00000005238.13,FAM214B,coding,chr9:35094108-35105999	ENSG00000013392.5,RWDD2A,coding,chr6:83959816-83963101	0.854572
ENSG00000005238.13,FAM214B,coding,chr9:35094108-35105999	ENSG00000006047.7,YBX2,coding,chr17:7132294-7138600	0.854572
ENSG00000005238.13,FAM214B,coding,chr9:35094108-35105999	ENSG00000068001.9,HYAL2,coding,chr3:50330224-50335341	0.854572
ENSG00000005238.13,FAM214B,coding,chr9:35094108-35105999	ENSG00000005436.9,GCFC2,coding,chr2:75732633-75791623	0.854572
ENSG00000005238.13,FAM214B,coding,chr9:35094108-35105999	ENSG00000083535.10,PIBF1,coding,chr13:72254197-72488593	0.854572
ENSG00000005238.13,FAM214B,coding,chr9:35094108-35105999	ENSG00000001167.10,NFYA,coding,chr6:41148661-41175693	0.854572
ENSG00000005238.13,FAM214B,coding,chr9:35094108-35105999	ENSG00000023287.8,RB1CC1,coding,chr8:53697568-53820956	0.854572
ENSG00000005238.13,FAM214B,coding,chr9:35094108-35105999	ENSG00000008323.11,PLEKHG6,coding,chr12:6289862-6307933	0.854572
ENSG00000005238.13,FAM214B,coding,chr9:35094108-35105999	ENSG00000137364.4,TPMT,coding,chr6:18236520-18263284	0.854572
ENSG00000005238.13,FAM214B,coding,chr9:35094108-35105999	ENSG00000010438.11,PRSS3,coding,chr9:33740514-33789230	0.854572
ENSG00000005238.13,FAM214B,coding,chr9:35094108-35105999	ENSG00000049167.8,ERCC8,coding,chr5:60205414-60276657	0.854572
ENSG00000005238.13,FAM214B,coding,chr9:35094108-35105999	ENSG00000013588.5,GPRC5A,coding,chr12:12934982-12962138	0.854572
ENSG00000005238.13,FAM214B,coding,chr9:35094108-35105999	ENSG00000005156.5,LIG3,coding,chr17:30331654-30356196	0.854572
ENSG00000005238.13,FAM214B,coding,chr9:35094108-35105999	ENSG00000005812.6,FBXL3,coding,chr13:76464740-76499331	0.854572
ENSG00000005238.13,FAM214B,coding,chr9:35094108-35105999	ENSG00000086666.14,ZFAND6,coding,chr15:78138964-78217790	0.854572
ENSG00000005238.13,FAM214B,coding,chr9:35094108-35105999	ENSG00000106459.10,NRF1,coding,chr7:129038790-129184158	0.854572
ENSG00000005238.13,FAM214B,coding,chr9:35094108-35105999	ENSG00000072135.7,PTPN18,coding,chr2:130830049-130849452	0.854572
ENSG00000005238.13,FAM214B,coding,chr9:35094108-35105999	ENSG00000088325.11,TPX2,coding,chr20:29790734-29853269	0.854572
ENSG00000005243.4,COPZ2,coding,chr17:43458533-43470138	ENSG00000011465.12,DCN,coding,chr12:90063155-90101031	0.843773
ENSG00000005243.4,COPZ2,coding,chr17:43458533-43470138	ENSG00000019549.4,SNAI2,coding,chr8:49992801-49996852	0.843773
ENSG00000005243.4,COPZ2,coding,chr17:43458533-43470138	ENSG00000006468.9,ETV1,coding,chr7:13897377-13997575	0.843773
ENSG00000005243.4,COPZ2,coding,chr17:43458533-43470138	ENSG00000006606.4,CCL26,coding,chr7:75236786-75257150	0.843773
ENSG00000005243.4,COPZ2,coding,chr17:43458533-43470138	ENSG00000010295.13,IFFO1,coding,chr12:6517801-6535500	0.843773
ENSG00000005243.4,COPZ2,coding,chr17:43458533-43470138	ENSG00000002933.3,TMEM176A,coding,chr7:150128423-150133141	0.843773
ENSG00000005243.4,COPZ2,coding,chr17:43458533-43470138	ENSG00000005073.5,HOXA11,coding,chr7:27187653-27191367	0.843773
ENSG00000005243.4,COPZ2,coding,chr17:43458533-43470138	ENSG00000003436.10,TFPI,coding,chr2:188037201-188138732	0.843773
ENSG00000005243.4,COPZ2,coding,chr17:43458533-43470138	ENSG00000027644.4,INSRR,coding,chr1:155076478-155095434	0.843773
ENSG00000005243.4,COPZ2,coding,chr17:43458533-43470138	ENSG00000006283.12,CACNA1G,coding,chr17:45993427-46059834	0.843773
ENSG00000005243.4,COPZ2,coding,chr17:43458533-43470138	ENSG00000000971.10,CFH,coding,chr1:194887630-194983257	0.843773
ENSG00000005243.4,COPZ2,coding,chr17:43458533-43470138	ENSG00000005187.7,ACSM3,coding,chr16:20529065-20716404	0.843773
ENSG00000005243.4,COPZ2,coding,chr17:43458533-43470138	ENSG00000003137.4,CYP26B1,coding,chr2:72209874-72228675	0.843773
ENSG00000005243.4,COPZ2,coding,chr17:43458533-43470138	ENSG00000004848.6,ARX,coding,chrX:24931731-24943986	0.843773
ENSG00000005243.4,COPZ2,coding,chr17:43458533-43470138	ENSG00000076344.11,RGS11,coding,chr16:258300-265981	0.843773
ENSG00000005243.4,COPZ2,coding,chr17:43458533-43470138	ENSG00000000938.7,FGR,coding,chr1:27811161-27834375	0.843773
ENSG00000005243.4,COPZ2,coding,chr17:43458533-43470138	ENSG00000086289.7,EPDR1,coding,chr7:37689970-37958068	0.843773
ENSG00000005243.4,COPZ2,coding,chr17:43458533-43470138	ENSG00000002746.8,HECW1,coding,chr7:43118722-43569463	0.843773
ENSG00000005243.4,COPZ2,coding,chr17:43458533-43470138	ENSG00000004487.10,KDM1A,coding,chr1:23218527-23282769	0.843773
ENSG00000005243.4,COPZ2,coding,chr17:43458533-43470138	ENSG00000003249.8,DBNDD1,coding,chr16:88598773-88614037	0.843773
ENSG00000005243.4,COPZ2,coding,chr17:43458533-43470138	ENSG00000092201.4,SUPT16H,coding,chr14:20889470-20922265	0.843773
ENSG00000005243.4,COPZ2,coding,chr17:43458533-43470138	ENSG00000007545.10,CRAMP1L,coding,chr16:1602326-1667910	0.843773
ENSG00000005243.4,COPZ2,coding,chr17:43458533-43470138	ENSG00000000457.8,SCYL3,coding,chr1:168088427-168130032	0.843773
ENSG00000005243.4,COPZ2,coding,chr17:43458533-43470138	ENSG00000000003.9,TSPAN6,coding,chrX:99770322-99781644	0.843773
ENSG00000005243.4,COPZ2,coding,chr17:43458533-43470138	ENSG00000002919.9,SNX11,coding,chr17:43539909-43555104	0.843773
ENSG00000005243.4,COPZ2,coding,chr17:43458533-43470138	ENSG00000005102.8,MEOX1,coding,chr17:39073281-39094848	0.843773
ENSG00000005243.4,COPZ2,coding,chr17:43458533-43470138	ENSG00000002822.9,MAD1L1,coding,chr7:1821908-2239404	0.843773
ENSG00000005243.4,COPZ2,coding,chr17:43458533-43470138	ENSG00000001461.11,NIPAL3,coding,chr1:24614870-24672053	0.843773
ENSG00000005243.4,COPZ2,coding,chr17:43458533-43470138	ENSG00000009709.7,PAX7,coding,chr1:18830086-18947947	0.843773
ENSG00000005243.4,COPZ2,coding,chr17:43458533-43470138	ENSG00000000005.5,TNMD,coding,chrX:99726454-99741538	0.843773
ENSG00000005243.4,COPZ2,coding,chr17:43458533-43470138	ENSG00000004799.6,PDK4,coding,chr7:95050746-95063764	0.843773
ENSG00000005243.4,COPZ2,coding,chr17:43458533-43470138	ENSG00000004468.6,CD38,coding,chr4:15388995-15460167	0.843773
ENSG00000005243.4,COPZ2,coding,chr17:43458533-43470138	ENSG00000007392.12,LUC7L,coding,chr16:178968-219463	0.843773
ENSG00000005243.4,COPZ2,coding,chr17:43458533-43470138	ENSG00000021300.7,PLEKHB1,coding,chr11:73034870-73051512	0.843773
ENSG00000005243.4,COPZ2,coding,chr17:43458533-43470138	ENSG00000080007.6,DDX43,coding,chr6:74161191-74184013	0.843773
ENSG00000005339.6,CREBBP,coding,chr16:3715055-3870723	ENSG00000006194.5,ZNF263,coding,chr16:3253800-3281461	0.904176
ENSG00000005339.6,CREBBP,coding,chr16:3715055-3870723	ENSG00000080603.11,SRCAP,coding,chr16:30617030-30663103	0.904176
ENSG00000005339.6,CREBBP,coding,chr16:3715055-3870723	ENSG00000049618.14,ARID1B,coding,chr6:157140754-157572093	0.904176
ENSG00000005339.6,CREBBP,coding,chr16:3715055-3870723	ENSG00000038382.12,TRIO,coding,chr5:14196810-14585235	0.904176
ENSG00000005339.6,CREBBP,coding,chr16:3715055-3870723	ENSG00000108175.11,ZMIZ1,coding,chr10:80498797-80746291	0.904176
ENSG00000005339.6,CREBBP,coding,chr16:3715055-3870723	ENSG00000005483.13,MLL5,coding,chr7:104441861-104542044	0.904176
ENSG00000005339.6,CREBBP,coding,chr16:3715055-3870723	ENSG00000001167.10,NFYA,coding,chr6:41148661-41175693	0.904176
ENSG00000005339.6,CREBBP,coding,chr16:3715055-3870723	ENSG00000005007.7,UPF1,coding,chr19:18803743-18840038	0.904176
ENSG00000005339.6,CREBBP,coding,chr16:3715055-3870723	ENSG00000004059.5,ARF5,coding,chr7:127015634-127018995	0.904176
ENSG00000005339.6,CREBBP,coding,chr16:3715055-3870723	ENSG00000002834.11,LASP1,coding,chr17:34279781-34331549	0.904176
ENSG00000005339.6,CREBBP,coding,chr16:3715055-3870723	ENSG00000006015.12,C19orf60,coding,chr19:18560494-18564146	0.904176
ENSG00000005339.6,CREBBP,coding,chr16:3715055-3870723	ENSG00000005379.10,BZRAP1,coding,chr17:53733596-53761151	0.904176
ENSG00000005339.6,CREBBP,coding,chr16:3715055-3870723	ENSG00000002016.11,RAD52,coding,chr12:891503-970617	0.904176
ENSG00000005339.6,CREBBP,coding,chr16:3715055-3870723	ENSG00000008086.6,CDKL5,coding,chrX:18353623-18581670	0.904176
ENSG00000005339.6,CREBBP,coding,chr16:3715055-3870723	ENSG00000000457.8,SCYL3,coding,chr1:168088427-168130032	0.904176
ENSG00000005339.6,CREBBP,coding,chr16:3715055-3870723	ENSG00000166912.11,MTMR10,coding,chr15:29018435-29071102	0.904176
ENSG00000005339.6,CREBBP,coding,chr16:3715055-3870723	ENSG00000001084.6,GCLC,coding,chr6:53470097-53589727	0.904176
ENSG00000005339.6,CREBBP,coding,chr16:3715055-3870723	ENSG00000065243.13,PKN2,coding,chr1:88922492-89074526	0.904176
ENSG00000005339.6,CREBBP,coding,chr16:3715055-3870723	ENSG00000001629.5,ANKIB1,coding,chr7:91713483-91868634	0.904176
ENSG00000005339.6,CREBBP,coding,chr16:3715055-3870723	ENSG00000110442.6,COMMD9,coding,chr11:36251626-36267575	0.904176
ENSG00000005339.6,CREBBP,coding,chr16:3715055-3870723	ENSG00000000419.7,DPM1,coding,chr20:48984810-49008499	0.904176
ENSG00000005339.6,CREBBP,coding,chr16:3715055-3870723	ENSG00000003137.4,CYP26B1,coding,chr2:72209874-72228675	0.904176
ENSG00000005339.6,CREBBP,coding,chr16:3715055-3870723	ENSG00000004961.10,HCCS,coding,chrX:11039341-11051119	0.904176
ENSG00000005339.6,CREBBP,coding,chr16:3715055-3870723	ENSG00000075239.9,ACAT1,coding,chr11:107497452-107523713	0.904176
ENSG00000005339.6,CREBBP,coding,chr16:3715055-3870723	ENSG00000005187.7,ACSM3,coding,chr16:20529065-20716404	0.904176
ENSG00000005339.6,CREBBP,coding,chr16:3715055-3870723	ENSG00000007520.3,C16orf42,coding,chr16:1339241-1341913	0.904176
ENSG00000005339.6,CREBBP,coding,chr16:3715055-3870723	ENSG00000006625.11,GGCT,coding,chr7:30502761-30510985	0.904176
ENSG00000005339.6,CREBBP,coding,chr16:3715055-3870723	ENSG00000261421.1,RP11-22D3.1.1,coding,chr16:47750919-47753435	0.904176
ENSG00000005339.6,CREBBP,coding,chr16:3715055-3870723	ENSG00000007350.11,TKTL1,coding,chrX:153177217-153211907	0.904176
ENSG00000005339.6,CREBBP,coding,chr16:3715055-3870723	ENSG00000002919.9,SNX11,coding,chr17:43539909-43555104	0.904176
ENSG00000005339.6,CREBBP,coding,chr16:3715055-3870723	ENSG00000013392.5,RWDD2A,coding,chr6:83959816-83963101	0.904176
ENSG00000005339.6,CREBBP,coding,chr16:3715055-3870723	ENSG00000001630.10,CYP51A1,coding,chr7:91579400-91610202	0.904176
ENSG00000005339.6,CREBBP,coding,chr16:3715055-3870723	ENSG00000006652.8,IFRD1,coding,chr7:111850258-111908308	0.904176
ENSG00000005339.6,CREBBP,coding,chr16:3715055-3870723	ENSG00000003400.10,CASP10,coding,chr2:201755848-201802374	0.904176
ENSG00000005339.6,CREBBP,coding,chr16:3715055-3870723	ENSG00000003147.13,ICA1,coding,chr7:8119338-8268842	0.904176
ENSG00000005339.6,CREBBP,coding,chr16:3715055-3870723	ENSG00000005001.3,PRSS22,coding,chr16:2842728-2848172	0.904176
ENSG00000005379.10,BZRAP1,coding,chr17:53733596-53761151	ENSG00000184194.5,GPR173,coding,chrX:53094997-53126522	0.853085
ENSG00000005379.10,BZRAP1,coding,chr17:53733596-53761151	ENSG00000003756.11,RBM5,coding,chr3:50101344-50131458	0.853085
ENSG00000005379.10,BZRAP1,coding,chr17:53733596-53761151	ENSG00000007545.10,CRAMP1L,coding,chr16:1602326-1667910	0.853085
ENSG00000005379.10,BZRAP1,coding,chr17:53733596-53761151	ENSG00000026036.16,RTEL1,coding,chr20:61761096-61800481	0.853085
ENSG00000005379.10,BZRAP1,coding,chr17:53733596-53761151	ENSG00000011143.11,MKS1,coding,chr17:53637797-53651965	0.853085
ENSG00000005379.10,BZRAP1,coding,chr17:53733596-53761151	ENSG00000002016.11,RAD52,coding,chr12:891503-970617	0.853085
ENSG00000005379.10,BZRAP1,coding,chr17:53733596-53761151	ENSG00000003393.10,ALS2,coding,chr2:202273521-202354157	0.853085
ENSG00000005379.10,BZRAP1,coding,chr17:53733596-53761151	ENSG00000064201.10,TSPAN32,coding,chr11:2279802-2296006	0.853085
ENSG00000005379.10,BZRAP1,coding,chr17:53733596-53761151	ENSG00000004838.9,ZMYND10,coding,chr3:50353544-50359287	0.853085
ENSG00000005379.10,BZRAP1,coding,chr17:53733596-53761151	ENSG00000006025.6,OSBPL7,coding,chr17:43239731-43254199	0.853085
ENSG00000005379.10,BZRAP1,coding,chr17:53733596-53761151	ENSG00000001460.12,C1orf201,coding,chr1:24556075-24616011	0.853085
ENSG00000005379.10,BZRAP1,coding,chr17:53733596-53761151	ENSG00000004139.8,SARM1,coding,chr17:23715504-23752173	0.853085
ENSG00000005379.10,BZRAP1,coding,chr17:53733596-53761151	ENSG00000005882.6,PDK2,coding,chr17:45527099-45544515	0.853085
ENSG00000005379.10,BZRAP1,coding,chr17:53733596-53761151	ENSG00000007516.8,BAIAP3,coding,chr16:1323602-1339440	0.853085
ENSG00000005379.10,BZRAP1,coding,chr17:53733596-53761151	ENSG00000006062.8,MAP3K14,coding,chr17:40696270-40750197	0.853085
ENSG00000005379.10,BZRAP1,coding,chr17:53733596-53761151	ENSG00000007341.12,ST7L,coding,chr1:112867662-112964970	0.853085
ENSG00000005379.10,BZRAP1,coding,chr17:53733596-53761151	ENSG00000001631.9,KRIT1,coding,chr7:91666218-91713416	0.853085
ENSG00000005379.10,BZRAP1,coding,chr17:53733596-53761151	ENSG00000001497.12,LAS1L,coding,chrX:64649186-64671380	0.853085
ENSG00000005379.10,BZRAP1,coding,chr17:53733596-53761151	ENSG00000005022.5,SLC25A5,coding,chrX:118486390-118489310	0.853085
ENSG00000005379.10,BZRAP1,coding,chr17:53733596-53761151	ENSG00000001167.10,NFYA,coding,chr6:41148661-41175693	0.853085
ENSG00000005379.10,BZRAP1,coding,chr17:53733596-53761151	ENSG00000011295.7,TTC19,coding,chr17:15843506-15889061	0.853085
ENSG00000005379.10,BZRAP1,coding,chr17:53733596-53761151	ENSG00000244274.3,DBNDD2,coding,chr20:43468110-43472664	0.853085
ENSG00000005379.10,BZRAP1,coding,chr17:53733596-53761151	ENSG00000005884.11,ITGA3,coding,chr17:45488330-45522847	0.853085
ENSG00000005379.10,BZRAP1,coding,chr17:53733596-53761151	ENSG00000004975.6,DVL2,coding,chr17:7069383-7078592	0.853085
ENSG00000005379.10,BZRAP1,coding,chr17:53733596-53761151	ENSG00000008311.10,AASS,coding,chr7:121502936-121571570	0.853085
ENSG00000005379.10,BZRAP1,coding,chr17:53733596-53761151	ENSG00000000457.8,SCYL3,coding,chr1:168088427-168130032	0.853085
ENSG00000005379.10,BZRAP1,coding,chr17:53733596-53761151	ENSG00000008056.8,SYN1,coding,chrX:47316246-47364196	0.853085
ENSG00000005379.10,BZRAP1,coding,chr17:53733596-53761151	ENSG00000001617.7,SEMA3F,coding,chr3:50167481-50201512	0.853085
ENSG00000005379.10,BZRAP1,coding,chr17:53733596-53761151	ENSG00000023892.8,DEF6,coding,chr6:35373572-35397526	0.853085
ENSG00000005379.10,BZRAP1,coding,chr17:53733596-53761151	ENSG00000004487.10,KDM1A,coding,chr1:23218527-23282769	0.853085
ENSG00000005379.10,BZRAP1,coding,chr17:53733596-53761151	ENSG00000011114.10,BTBD7,coding,chr14:92773648-92869191	0.853085
ENSG00000005379.10,BZRAP1,coding,chr17:53733596-53761151	ENSG00000003137.4,CYP26B1,coding,chr2:72209874-72228675	0.853085
ENSG00000005379.10,BZRAP1,coding,chr17:53733596-53761151	ENSG00000004961.10,HCCS,coding,chrX:11039341-11051119	0.853085
ENSG00000005379.10,BZRAP1,coding,chr17:53733596-53761151	ENSG00000014164.5,ZC3H3,coding,chr8:144590967-144694766	0.853085
ENSG00000005379.10,BZRAP1,coding,chr17:53733596-53761151	ENSG00000000003.9,TSPAN6,coding,chrX:99770322-99781644	0.853085
ENSG00000005379.10,BZRAP1,coding,chr17:53733596-53761151	ENSG00000030582.10,GRN,coding,chr17:39778016-39785996	0.853085
ENSG00000005379.10,BZRAP1,coding,chr17:53733596-53761151	ENSG00000001630.10,CYP51A1,coding,chr7:91579400-91610202	0.853085
ENSG00000005379.10,BZRAP1,coding,chr17:53733596-53761151	ENSG00000002919.9,SNX11,coding,chr17:43539909-43555104	0.853085
ENSG00000005379.10,BZRAP1,coding,chr17:53733596-53761151	ENSG00000006831.9,ADIPOR2,coding,chr12:1668000-1768105	0.853085
ENSG00000005379.10,BZRAP1,coding,chr17:53733596-53761151	ENSG00000006075.10,CCL3,coding,chr17:31439714-31441628	0.853085
ENSG00000005379.10,BZRAP1,coding,chr17:53733596-53761151	ENSG00000010256.6,UQCRC1,coding,chr3:48611438-48623413	0.853085
ENSG00000005379.10,BZRAP1,coding,chr17:53733596-53761151	ENSG00000004478.5,FKBP4,coding,chr12:2774379-2784837	0.853085
ENSG00000005379.10,BZRAP1,coding,chr17:53733596-53761151	ENSG00000016602.8,CLCA4,coding,chr1:86785348-86819025	0.853085
ENSG00000005379.10,BZRAP1,coding,chr17:53733596-53761151	ENSG00000006747.10,SCIN,coding,chr7:12576727-12659753	0.853085
ENSG00000005379.10,BZRAP1,coding,chr17:53733596-53761151	ENSG00000004864.8,SLC25A13,coding,chr7:95587467-95789395	0.853085
ENSG00000005379.10,BZRAP1,coding,chr17:53733596-53761151	ENSG00000128274.10,A4GALT,coding,chr22:41418070-41447248	0.853085
ENSG00000005379.10,BZRAP1,coding,chr17:53733596-53761151	ENSG00000023191.11,RNH1,coding,chr11:484511-497300	0.853085
ENSG00000005448.12,WDR54,coding,chr2:74502312-74506390	ENSG00000159239.7,C2orf81,coding,chr2:74494811-74502226	0.844517
ENSG00000005448.12,WDR54,coding,chr2:74502312-74506390	ENSG00000137691.7,C11orf70,coding,chr11:101423383-101460501	0.844517
ENSG00000005448.12,WDR54,coding,chr2:74502312-74506390	ENSG00000011143.11,MKS1,coding,chr17:53637797-53651965	0.844517
ENSG00000005448.12,WDR54,coding,chr2:74502312-74506390	ENSG00000004838.9,ZMYND10,coding,chr3:50353544-50359287	0.844517
ENSG00000005448.12,WDR54,coding,chr2:74502312-74506390	ENSG00000115282.14,TTC31,coding,chr2:74563707-74575521	0.844517
ENSG00000005448.12,WDR54,coding,chr2:74502312-74506390	ENSG00000115274.10,INO80B,coding,chr2:74535657-74541519	0.844517
ENSG00000005448.12,WDR54,coding,chr2:74502312-74506390	ENSG00000087250.4,MT3,coding,chr16:55180486-55182501	0.844517
ENSG00000005448.12,WDR54,coding,chr2:74502312-74506390	ENSG00000001460.12,C1orf201,coding,chr1:24556075-24616011	0.844517
ENSG00000005448.12,WDR54,coding,chr2:74502312-74506390	ENSG00000006459.6,JHDM1D,coding,chr7:139431014-139523304	0.844517
ENSG00000005448.12,WDR54,coding,chr2:74502312-74506390	ENSG00000014641.13,MDH1,coding,chr2:63669246-63687835	0.844517
ENSG00000005448.12,WDR54,coding,chr2:74502312-74506390	ENSG00000059915.10,PSD,coding,chr10:104152365-104171286	0.844517
ENSG00000005448.12,WDR54,coding,chr2:74502312-74506390	ENSG00000010810.11,FYN,coding,chr6:112088227-112301348	0.844517
ENSG00000005448.12,WDR54,coding,chr2:74502312-74506390	ENSG00000042317.12,SPATA7,coding,chr14:87921020-88006447	0.844517
ENSG00000005448.12,WDR54,coding,chr2:74502312-74506390	ENSG00000035141.3,FAM136A,coding,chr2:70376610-70382726	0.844517
ENSG00000005448.12,WDR54,coding,chr2:74502312-74506390	ENSG00000003987.9,MTMR7,coding,chr8:17199909-17315408	0.844517
ENSG00000005448.12,WDR54,coding,chr2:74502312-74506390	ENSG00000000938.7,FGR,coding,chr1:27811161-27834375	0.844517
ENSG00000005448.12,WDR54,coding,chr2:74502312-74506390	ENSG00000003400.10,CASP10,coding,chr2:201755848-201802374	0.844517
ENSG00000005448.12,WDR54,coding,chr2:74502312-74506390	ENSG00000000003.9,TSPAN6,coding,chrX:99770322-99781644	0.844517
ENSG00000005448.12,WDR54,coding,chr2:74502312-74506390	ENSG00000011523.8,CEP68,coding,chr2:65137003-65167642	0.844517
ENSG00000005448.12,WDR54,coding,chr2:74502312-74506390	ENSG00000003436.10,TFPI,coding,chr2:188037201-188138732	0.844517
ENSG00000005448.12,WDR54,coding,chr2:74502312-74506390	ENSG00000123416.9,TUBA1B,coding,chr12:47807831-47811447	0.844517
ENSG00000005448.12,WDR54,coding,chr2:74502312-74506390	ENSG00000004399.8,PLXND1,coding,chr3:130756707-130808351	0.844517
ENSG00000005448.12,WDR54,coding,chr2:74502312-74506390	ENSG00000010292.7,NCAPD2,coding,chr12:6472782-6511382	0.844517
ENSG00000005448.12,WDR54,coding,chr2:74502312-74506390	ENSG00000072518.14,MARK2,coding,chr11:63362975-63435067	0.844517
ENSG00000005448.12,WDR54,coding,chr2:74502312-74506390	ENSG00000001630.10,CYP51A1,coding,chr7:91579400-91610202	0.844517
ENSG00000005448.12,WDR54,coding,chr2:74502312-74506390	ENSG00000000971.10,CFH,coding,chr1:194887630-194983257	0.844517
ENSG00000005448.12,WDR54,coding,chr2:74502312-74506390	ENSG00000138449.5,SLC40A1,coding,chr2:190133549-190156729	0.844517
ENSG00000005448.12,WDR54,coding,chr2:74502312-74506390	ENSG00000074800.8,ENO1,coding,chr1:8843647-8861895	0.844517
ENSG00000005448.12,WDR54,coding,chr2:74502312-74506390	ENSG00000010017.8,RANBP9,coding,chr6:13729708-13819932	0.844517
ENSG00000005448.12,WDR54,coding,chr2:74502312-74506390	ENSG00000000419.7,DPM1,coding,chr20:48984810-49008499	0.844517
ENSG00000005448.12,WDR54,coding,chr2:74502312-74506390	ENSG00000006007.7,GDE1,coding,chr16:19420515-19440968	0.844517
ENSG00000005448.12,WDR54,coding,chr2:74502312-74506390	ENSG00000006555.6,TTC22,coding,chr1:55017972-55039528	0.844517
ENSG00000005448.12,WDR54,coding,chr2:74502312-74506390	ENSG00000123154.7,WDR83,coding,chr19:12638613-12647646	0.844517
ENSG00000005448.12,WDR54,coding,chr2:74502312-74506390	ENSG00000069206.10,ADAM7,coding,chr8:24354387-24440373	0.844517
ENSG00000005448.12,WDR54,coding,chr2:74502312-74506390	ENSG00000001629.5,ANKIB1,coding,chr7:91713483-91868634	0.844517
ENSG00000005448.12,WDR54,coding,chr2:74502312-74506390	ENSG00000004866.13,ST7,coding,chr7:116380527-116657393	0.844517
ENSG00000005448.12,WDR54,coding,chr2:74502312-74506390	ENSG00000001461.11,NIPAL3,coding,chr1:24614870-24672053	0.844517
ENSG00000005448.12,WDR54,coding,chr2:74502312-74506390	ENSG00000095713.9,CRTAC1,coding,chr10:99614746-99780575	0.844517
ENSG00000005448.12,WDR54,coding,chr2:74502312-74506390	ENSG00000110697.8,PITPNM1,coding,chr11:67015814-67030310	0.844517
ENSG00000005448.12,WDR54,coding,chr2:74502312-74506390	ENSG00000021852.8,C8B,coding,chr1:57167470-57204401	0.844517
ENSG00000005448.12,WDR54,coding,chr2:74502312-74506390	ENSG00000015532.4,XYLT2,coding,chr17:45778451-45795498	0.844517
ENSG00000005469.7,CROT,coding,chr7:86812932-86867047	ENSG00000004766.11,CCDC132,coding,chr7:92699588-92826274	0.832527
ENSG00000005469.7,CROT,coding,chr7:86812932-86867047	ENSG00000001631.9,KRIT1,coding,chr7:91666218-91713416	0.832527
ENSG00000005469.7,CROT,coding,chr7:86812932-86867047	ENSG00000001629.5,ANKIB1,coding,chr7:91713483-91868634	0.832527
ENSG00000005469.7,CROT,coding,chr7:86812932-86867047	ENSG00000028203.12,VEZT,coding,chr12:94135652-94220697	0.832527
ENSG00000005469.7,CROT,coding,chr7:86812932-86867047	ENSG00000182165.12,TP53TG1,lncRNA,chr7:86792476-86812767	0.832527
ENSG00000005469.7,CROT,coding,chr7:86812932-86867047	ENSG00000006576.11,PHTF2,coding,chr7:77266044-77424754	0.832527
ENSG00000005469.7,CROT,coding,chr7:86812932-86867047	ENSG00000003987.9,MTMR7,coding,chr8:17199909-17315408	0.832527
ENSG00000005469.7,CROT,coding,chr7:86812932-86867047	ENSG00000005436.9,GCFC2,coding,chr2:75732633-75791623	0.832527
ENSG00000005469.7,CROT,coding,chr7:86812932-86867047	ENSG00000054983.11,GALC,coding,chr14:87373916-87529762	0.832527
ENSG00000005469.7,CROT,coding,chr7:86812932-86867047	ENSG00000196177.7,ACADSB,coding,chr10:124758484-124807817	0.832527
ENSG00000005469.7,CROT,coding,chr7:86812932-86867047	ENSG00000006042.5,TMEM98,coding,chr17:28279040-28292780	0.832527
ENSG00000005469.7,CROT,coding,chr7:86812932-86867047	ENSG00000000457.8,SCYL3,coding,chr1:168088427-168130032	0.832527
ENSG00000005469.7,CROT,coding,chr7:86812932-86867047	ENSG00000036530.4,CYP46A1,coding,chr14:99220393-99263391	0.832527
ENSG00000005469.7,CROT,coding,chr7:86812932-86867047	ENSG00000008441.10,NFIX,coding,chr19:12967583-13070610	0.832527
ENSG00000005469.7,CROT,coding,chr7:86812932-86867047	ENSG00000234635.1,RP11-9E13.2.1,lncRNA,chr10:69907760-69910527	0.832527
ENSG00000005469.7,CROT,coding,chr7:86812932-86867047	ENSG00000073067.9,CYP2W1,coding,chr7:989360-995802	0.832527
ENSG00000005469.7,CROT,coding,chr7:86812932-86867047	ENSG00000103047.2,TMCO7,coding,chr16:67435007-67676584	0.832527
ENSG00000005469.7,CROT,coding,chr7:86812932-86867047	ENSG00000004846.12,ABCB5,coding,chr7:20621354-20783183	0.832527
ENSG00000005469.7,CROT,coding,chr7:86812932-86867047	ENSG00000243056.1,EIF4EBP3,coding,chr5:139907434-139909347	0.832527
ENSG00000005469.7,CROT,coding,chr7:86812932-86867047	ENSG00000084764.6,MAPRE3,coding,chr2:27046983-27103568	0.832527
ENSG00000005469.7,CROT,coding,chr7:86812932-86867047	ENSG00000001036.8,FUCA2,coding,chr6:143858306-143874520	0.832527
ENSG00000005469.7,CROT,coding,chr7:86812932-86867047	ENSG00000006118.10,TMEM132A,coding,chr11:60448510-60461207	0.832527
ENSG00000005469.7,CROT,coding,chr7:86812932-86867047	ENSG00000001461.11,NIPAL3,coding,chr1:24614870-24672053	0.832527
ENSG00000005469.7,CROT,coding,chr7:86812932-86867047	ENSG00000000003.9,TSPAN6,coding,chrX:99770322-99781644	0.832527
ENSG00000005469.7,CROT,coding,chr7:86812932-86867047	ENSG00000087502.12,ERGIC2,coding,chr12:29381551-29425389	0.832527
ENSG00000005469.7,CROT,coding,chr7:86812932-86867047	ENSG00000088305.12,DNMT3B,coding,chr20:30813851-30860823	0.832527
ENSG00000005469.7,CROT,coding,chr7:86812932-86867047	ENSG00000224738.1,AC099850.1.1,lncRNA,chr17:54538740-54550410	0.832527
ENSG00000005469.7,CROT,coding,chr7:86812932-86867047	ENSG00000011021.17,CLCN6,coding,chr1:11788793-11825788	0.832527
ENSG00000005469.7,CROT,coding,chr7:86812932-86867047	ENSG00000004487.10,KDM1A,coding,chr1:23218527-23282769	0.832527
ENSG00000005469.7,CROT,coding,chr7:86812932-86867047	ENSG00000002549.7,LAP3,coding,chr4:17187912-17218693	0.832527
ENSG00000005469.7,CROT,coding,chr7:86812932-86867047	ENSG00000109061.7,MYH1,coding,chr17:10336348-10362585	0.832527
ENSG00000005469.7,CROT,coding,chr7:86812932-86867047	ENSG00000047936.6,ROS1,coding,chr6:117716155-117853711	0.832527
ENSG00000005469.7,CROT,coding,chr7:86812932-86867047	ENSG00000182253.10,SYNM,coding,chr15:97455942-97493321	0.832527
ENSG00000005483.13,MLL5,coding,chr7:104441861-104542044	ENSG00000001631.9,KRIT1,coding,chr7:91666218-91713416	0.87227
ENSG00000005483.13,MLL5,coding,chr7:104441861-104542044	ENSG00000105821.9,DNAJC2,coding,chr7:102740156-102772556	0.87227
ENSG00000005483.13,MLL5,coding,chr7:104441861-104542044	ENSG00000105879.4,CBLL1,coding,chr7:107171377-107188378	0.87227
ENSG00000005483.13,MLL5,coding,chr7:104441861-104542044	ENSG00000003393.10,ALS2,coding,chr2:202273521-202354157	0.87227
ENSG00000005483.13,MLL5,coding,chr7:104441861-104542044	ENSG00000001629.5,ANKIB1,coding,chr7:91713483-91868634	0.87227
ENSG00000005483.13,MLL5,coding,chr7:104441861-104542044	ENSG00000003756.11,RBM5,coding,chr3:50101344-50131458	0.87227
ENSG00000005483.13,MLL5,coding,chr7:104441861-104542044	ENSG00000004779.4,NDUFAB1,coding,chr16:23499823-23515178	0.87227
ENSG00000005483.13,MLL5,coding,chr7:104441861-104542044	ENSG00000005339.6,CREBBP,coding,chr16:3715055-3870723	0.87227
ENSG00000005483.13,MLL5,coding,chr7:104441861-104542044	ENSG00000048991.11,R3HDM1,coding,chr2:136005494-136199310	0.87227
ENSG00000005483.13,MLL5,coding,chr7:104441861-104542044	ENSG00000011405.8,PIK3C2A,coding,chr11:17055852-17186106	0.87227
ENSG00000005483.13,MLL5,coding,chr7:104441861-104542044	ENSG00000005955.7,GGNBP2,coding,chr17:31974885-32020391	0.87227
ENSG00000005483.13,MLL5,coding,chr7:104441861-104542044	ENSG00000005810.12,MYCBP2,coding,chr13:76516792-76799186	0.87227
ENSG00000005483.13,MLL5,coding,chr7:104441861-104542044	ENSG00000010818.4,HIVEP2,coding,chr6:143114296-143308031	0.87227
ENSG00000005483.13,MLL5,coding,chr7:104441861-104542044	ENSG00000002016.11,RAD52,coding,chr12:891503-970617	0.87227
ENSG00000005483.13,MLL5,coding,chr7:104441861-104542044	ENSG00000006459.6,JHDM1D,coding,chr7:139431014-139523304	0.87227
ENSG00000005483.13,MLL5,coding,chr7:104441861-104542044	ENSG00000008441.10,NFIX,coding,chr19:12967583-13070610	0.87227
ENSG00000005483.13,MLL5,coding,chr7:104441861-104542044	ENSG00000001167.10,NFYA,coding,chr6:41148661-41175693	0.87227
ENSG00000005483.13,MLL5,coding,chr7:104441861-104542044	ENSG00000001461.11,NIPAL3,coding,chr1:24614870-24672053	0.87227
ENSG00000005483.13,MLL5,coding,chr7:104441861-104542044	ENSG00000067533.5,RRP15,coding,chr1:216525251-216577948	0.87227
ENSG00000005483.13,MLL5,coding,chr7:104441861-104542044	ENSG00000008282.3,SYPL1,coding,chr7:105518184-105540258	0.87227
ENSG00000005483.13,MLL5,coding,chr7:104441861-104542044	ENSG00000000457.8,SCYL3,coding,chr1:168088427-168130032	0.87227
ENSG00000005483.13,MLL5,coding,chr7:104441861-104542044	ENSG00000058866.9,DGKG,coding,chr3:187306150-187562720	0.87227
ENSG00000005483.13,MLL5,coding,chr7:104441861-104542044	ENSG00000003400.10,CASP10,coding,chr2:201755848-201802374	0.87227
ENSG00000005483.13,MLL5,coding,chr7:104441861-104542044	ENSG00000009780.10,FAM76A,coding,chr1:27925076-27961062	0.87227
ENSG00000005483.13,MLL5,coding,chr7:104441861-104542044	ENSG00000001460.12,C1orf201,coding,chr1:24556075-24616011	0.87227
ENSG00000005483.13,MLL5,coding,chr7:104441861-104542044	ENSG00000004866.13,ST7,coding,chr7:116380527-116657393	0.87227
ENSG00000005483.13,MLL5,coding,chr7:104441861-104542044	ENSG00000056661.8,PCGF2,coding,chr17:34143675-34158084	0.87227
ENSG00000005483.13,MLL5,coding,chr7:104441861-104542044	ENSG00000001497.12,LAS1L,coding,chrX:64649186-64671380	0.87227
ENSG00000005483.13,MLL5,coding,chr7:104441861-104542044	ENSG00000023191.11,RNH1,coding,chr11:484511-497300	0.87227
ENSG00000005483.13,MLL5,coding,chr7:104441861-104542044	ENSG00000046604.7,DSG2,coding,chr18:27332024-27382811	0.87227
ENSG00000005483.13,MLL5,coding,chr7:104441861-104542044	ENSG00000002822.9,MAD1L1,coding,chr7:1821908-2239404	0.87227
ENSG00000005483.13,MLL5,coding,chr7:104441861-104542044	ENSG00000002919.9,SNX11,coding,chr17:43539909-43555104	0.87227
ENSG00000005483.13,MLL5,coding,chr7:104441861-104542044	ENSG00000007062.7,PROM1,coding,chr4:15573796-15695099	0.87227
ENSG00000005483.13,MLL5,coding,chr7:104441861-104542044	ENSG00000006634.3,DBF4,coding,chr7:87343466-87376792	0.87227
ENSG00000005483.13,MLL5,coding,chr7:104441861-104542044	ENSG00000106330.6,MOSPD3,coding,chr7:100047660-100050943	0.87227
ENSG00000005483.13,MLL5,coding,chr7:104441861-104542044	ENSG00000002549.7,LAP3,coding,chr4:17187912-17218693	0.87227
ENSG00000005483.13,MLL5,coding,chr7:104441861-104542044	ENSG00000005381.5,MPO,coding,chr17:53702215-53713295	0.87227
ENSG00000005483.13,MLL5,coding,chr7:104441861-104542044	ENSG00000005075.11,POLR2J,coding,chr7:101900569-101906359	0.87227
ENSG00000005483.13,MLL5,coding,chr7:104441861-104542044	ENSG00000001630.10,CYP51A1,coding,chr7:91579400-91610202	0.87227
ENSG00000005483.13,MLL5,coding,chr7:104441861-104542044	ENSG00000005206.9,AC004410.1,coding,chr19:2279628-2306099	0.87227
ENSG00000005483.13,MLL5,coding,chr7:104441861-104542044	ENSG00000109971.8,HSPA8,coding,chr11:122433406-122439148	0.87227
ENSG00000005483.13,MLL5,coding,chr7:104441861-104542044	ENSG00000036672.9,USP2,coding,chr11:118731134-118757646	0.87227
ENSG00000005483.13,MLL5,coding,chr7:104441861-104542044	ENSG00000013375.9,PGM3,coding,chr6:83927587-83960374	0.87227
ENSG00000005483.13,MLL5,coding,chr7:104441861-104542044	ENSG00000068912.9,ERLEC1,coding,chr2:53867684-53899460	0.87227
ENSG00000005486.10,RHBDD2,coding,chr7:75309855-75356180	ENSG00000127948.9,POR,coding,chr7:75366453-75454109	0.81895
ENSG00000005486.10,RHBDD2,coding,chr7:75309855-75356180	ENSG00000071462.7,WBSCR22,coding,chr7:72735290-72757427	0.81895
ENSG00000005486.10,RHBDD2,coding,chr7:75309855-75356180	ENSG00000005075.11,POLR2J,coding,chr7:101900569-101906359	0.81895
ENSG00000005486.10,RHBDD2,coding,chr7:75309855-75356180	ENSG00000106211.7,HSPB1,coding,chr7:75769796-75771548	0.81895
ENSG00000005486.10,RHBDD2,coding,chr7:75309855-75356180	ENSG00000004059.5,ARF5,coding,chr7:127015634-127018995	0.81895
ENSG00000005486.10,RHBDD2,coding,chr7:75309855-75356180	ENSG00000160325.9,C9orf7,coding,chr9:135314909-135325791	0.81895
ENSG00000005486.10,RHBDD2,coding,chr7:75309855-75356180	ENSG00000127946.12,HIP1,coding,chr7:75000556-75206216	0.81895
ENSG00000005486.10,RHBDD2,coding,chr7:75309855-75356180	ENSG00000002330.8,BAD,coding,chr11:63793877-63808752	0.81895
ENSG00000005486.10,RHBDD2,coding,chr7:75309855-75356180	ENSG00000005700.10,IBTK,coding,chr6:82936418-83014190	0.81895
ENSG00000005486.10,RHBDD2,coding,chr7:75309855-75356180	ENSG00000004864.8,SLC25A13,coding,chr7:95587467-95789395	0.81895
ENSG00000005486.10,RHBDD2,coding,chr7:75309855-75356180	ENSG00000009954.6,BAZ1B,coding,chr7:72492663-72574544	0.81895
ENSG00000005486.10,RHBDD2,coding,chr7:75309855-75356180	ENSG00000049089.9,COL9A2,coding,chr1:40538745-40556075	0.81895
ENSG00000005486.10,RHBDD2,coding,chr7:75309855-75356180	ENSG00000011258.9,MBTD1,coding,chr17:46609784-46692523	0.81895
ENSG00000005486.10,RHBDD2,coding,chr7:75309855-75356180	ENSG00000006704.6,GTF2IRD1,coding,chr7:73506055-73654867	0.81895
ENSG00000005486.10,RHBDD2,coding,chr7:75309855-75356180	ENSG00000078902.10,TOLLIP,coding,chr11:1252176-1287460	0.81895
ENSG00000005486.10,RHBDD2,coding,chr7:75309855-75356180	ENSG00000009830.6,POMT2,coding,chr14:76811051-76856980	0.81895
ENSG00000005486.10,RHBDD2,coding,chr7:75309855-75356180	ENSG00000060339.8,CCAR1,coding,chr10:70150774-70222140	0.81895
ENSG00000005486.10,RHBDD2,coding,chr7:75309855-75356180	ENSG00000005001.3,PRSS22,coding,chr16:2842728-2848172	0.81895
ENSG00000005486.10,RHBDD2,coding,chr7:75309855-75356180	ENSG00000002822.9,MAD1L1,coding,chr7:1821908-2239404	0.81895
ENSG00000005486.10,RHBDD2,coding,chr7:75309855-75356180	ENSG00000006125.11,AP2B1,coding,chr17:30938394-31077547	0.81895
ENSG00000005486.10,RHBDD2,coding,chr7:75309855-75356180	ENSG00000005206.9,AC004410.1,coding,chr19:2279628-2306099	0.81895
ENSG00000005486.10,RHBDD2,coding,chr7:75309855-75356180	ENSG00000069998.8,CECR5,coding,chr22:15998400-16026177	0.81895
ENSG00000005486.10,RHBDD2,coding,chr7:75309855-75356180	ENSG00000010438.11,PRSS3,coding,chr9:33740514-33789230	0.81895
ENSG00000005486.10,RHBDD2,coding,chr7:75309855-75356180	ENSG00000000460.11,C1orf112,coding,chr1:167897868-168089845	0.81895
ENSG00000005486.10,RHBDD2,coding,chr7:75309855-75356180	ENSG00000001460.12,C1orf201,coding,chr1:24556075-24616011	0.81895
ENSG00000005486.10,RHBDD2,coding,chr7:75309855-75356180	ENSG00000006712.9,PAF1,coding,chr19:44568114-44573597	0.81895
ENSG00000005486.10,RHBDD2,coding,chr7:75309855-75356180	ENSG00000011485.7,PPP5C,coding,chr19:51542090-51588078	0.81895
ENSG00000005486.10,RHBDD2,coding,chr7:75309855-75356180	ENSG00000122642.6,FKBP9,coding,chr7:32963541-33013068	0.81895
ENSG00000005486.10,RHBDD2,coding,chr7:75309855-75356180	ENSG00000155957.10,TMBIM4,coding,chr12:64803975-64850119	0.81895
ENSG00000005486.10,RHBDD2,coding,chr7:75309855-75356180	ENSG00000006007.7,GDE1,coding,chr16:19420515-19440968	0.81895
ENSG00000005486.10,RHBDD2,coding,chr7:75309855-75356180	ENSG00000008083.8,JARID2,coding,chr6:15353712-15630231	0.81895
ENSG00000005486.10,RHBDD2,coding,chr7:75309855-75356180	ENSG00000000003.9,TSPAN6,coding,chrX:99770322-99781644	0.81895
ENSG00000005486.10,RHBDD2,coding,chr7:75309855-75356180	ENSG00000000457.8,SCYL3,coding,chr1:168088427-168130032	0.81895
ENSG00000005486.10,RHBDD2,coding,chr7:75309855-75356180	ENSG00000033170.12,FUT8,coding,chr14:64947062-65280592	0.81895
ENSG00000005486.10,RHBDD2,coding,chr7:75309855-75356180	ENSG00000004961.10,HCCS,coding,chrX:11039341-11051119	0.81895
ENSG00000005486.10,RHBDD2,coding,chr7:75309855-75356180	ENSG00000004766.11,CCDC132,coding,chr7:92699588-92826274	0.81895
ENSG00000005486.10,RHBDD2,coding,chr7:75309855-75356180	ENSG00000059588.5,TARBP1,coding,chr1:232593681-232681472	0.81895
ENSG00000005486.10,RHBDD2,coding,chr7:75309855-75356180	ENSG00000110011.9,DNAJC4,coding,chr11:63754325-63758334	0.81895
ENSG00000005486.10,RHBDD2,coding,chr7:75309855-75356180	ENSG00000004399.8,PLXND1,coding,chr3:130756707-130808351	0.81895
ENSG00000005486.10,RHBDD2,coding,chr7:75309855-75356180	ENSG00000012660.9,ELOVL5,coding,chr6:53240154-53321906	0.81895
ENSG00000005486.10,RHBDD2,coding,chr7:75309855-75356180	ENSG00000004779.4,NDUFAB1,coding,chr16:23499823-23515178	0.81895
ENSG00000005700.10,IBTK,coding,chr6:82936418-83014190	ENSG00000083097.9,DOPEY1,coding,chr6:83834103-83937788	0.844823
ENSG00000005700.10,IBTK,coding,chr6:82936418-83014190	ENSG00000013375.9,PGM3,coding,chr6:83927587-83960374	0.844823
ENSG00000005700.10,IBTK,coding,chr6:82936418-83014190	ENSG00000082269.12,FAM135A,coding,chr6:71179364-71327598	0.844823
ENSG00000005700.10,IBTK,coding,chr6:82936418-83014190	ENSG00000014123.9,UFL1,coding,chr6:97076191-97109873	0.844823
ENSG00000005700.10,IBTK,coding,chr6:82936418-83014190	ENSG00000013392.5,RWDD2A,coding,chr6:83959816-83963101	0.844823
ENSG00000005700.10,IBTK,coding,chr6:82936418-83014190	ENSG00000004897.5,CDC27,coding,chr17:42550067-42621787	0.844823
ENSG00000005700.10,IBTK,coding,chr6:82936418-83014190	ENSG00000014824.7,SLC30A9,coding,chr4:41687245-41784308	0.844823
ENSG00000005700.10,IBTK,coding,chr6:82936418-83014190	ENSG00000153827.8,TRIP12,coding,chr2:230340173-230496199	0.844823
ENSG00000005700.10,IBTK,coding,chr6:82936418-83014190	ENSG00000001167.10,NFYA,coding,chr6:41148661-41175693	0.844823
ENSG00000005700.10,IBTK,coding,chr6:82936418-83014190	ENSG00000031003.6,FAM13B,coding,chr5:137301547-137415549	0.844823
ENSG00000005700.10,IBTK,coding,chr6:82936418-83014190	ENSG00000003393.10,ALS2,coding,chr2:202273521-202354157	0.844823
ENSG00000005700.10,IBTK,coding,chr6:82936418-83014190	ENSG00000000457.8,SCYL3,coding,chr1:168088427-168130032	0.844823
ENSG00000005700.10,IBTK,coding,chr6:82936418-83014190	ENSG00000004059.5,ARF5,coding,chr7:127015634-127018995	0.844823
ENSG00000005700.10,IBTK,coding,chr6:82936418-83014190	ENSG00000002330.8,BAD,coding,chr11:63793877-63808752	0.844823
[truncated: 379,086+ more rows]
