# Supplementary material for: The Identification and Analysis of mRNA–lncRNA–miRNA Cliques From the Integrative Network of Ovarian Cancer
Source: Front Genet. 2019 Aug 21;10:751. doi: 10.3389/fgene.2019.00751 (PMC6712160; doi:10.3389/fgene.2019.00751)
Supplement: Supplementary Material 4 — Four-cliques containing mRNA–lncRNA–miRNA triplets. [file Table_4.xlsx]

## Sheet: All
coding RNA 1	coding RNA 2	lncRNA 1	lncRNA 2	miRNA 1	miRNA 2	coding RNA 1 is log rank test significant	coding RNA 2 is log rank test significant	lncRNA 1 is log rank test significant	lncRNA 2 is log rank test significant	miRNA 1 is log rank test significant	miRNA 2 is log rank test significant	At least one of the coding RNA, lncRNA, miRNA is log rank test significant	coding RNA 1 is ANOVA significant	coding RNA 2 is ANOVA significant	lncRNA 1 is ANOVA significant	lncRNA 2 is ANOVA significant	miRNA 1 is ANOVA significant	miRNA 2 is ANOVA significant	At least one of the coding RNA, lncRNA, miRNA is ANOVA significant
ENSG00000215547.1,DEFB115,coding,chr20:29309127-29311096	ENSG00000197428.2,OR51D1,coding,chr11:4617520-4618644	ENSG00000231791.1,RP11-382D12.1.1,lncRNA,chr1:182564827-182568583	NA	ENSG00000207583.1,MIR606,miRNA,chr10:76982221-76982317	NA	0	0	0	0	0	0	0	0	0	0	0	0	0	0
ENSG00000205495.1,OR52J3,coding,chr11:5024331-5025267	NA	ENSG00000231791.1,RP11-382D12.1.1,lncRNA,chr1:182564827-182568583	ENSG00000243497.1,RP13-503K1.4.1,lncRNA,chr3:95277875-95283355	ENSG00000207583.1,MIR606,miRNA,chr10:76982221-76982317	NA	0	0	0	0	0	0	0	0	0	0	1	0	0	1
ENSG00000205495.1,OR52J3,coding,chr11:5024331-5025267	NA	ENSG00000231791.1,RP11-382D12.1.1,lncRNA,chr1:182564827-182568583	ENSG00000255528.1,RP11-25I9.2.1,lncRNA,chr11:108378401-108413904	ENSG00000207583.1,MIR606,miRNA,chr10:76982221-76982317	NA	0	0	0	0	0	0	0	0	0	0	0	0	0	0
ENSG00000259164.1,RP11-463C8.4.1,coding,chr14:76634406-76761558	NA	ENSG00000258747.1,RP11-163M18.1.1,lncRNA,chr14:44046359-44077466	NA	ENSG00000251856.1,MIR449C,miRNA,chr5:54503846-54503938	ENSG00000207613.1,MIR181C,miRNA,chr19:13846512-13846622	0	0	0	0	0	0	0	0	0	0	0	0	0	0
ENSG00000184724.4,KRTAP6-1,coding,chr21:30907620-30911767	NA	ENSG00000231413.1,RP11-193P11.3.1,lncRNA,chr1:48317045-48320455	ENSG00000234172.1,AC093639.1.1,lncRNA,chr2:184477500-184522084	ENSG00000207989.1,MIR493,miRNA,chr14:100405149-100405238	NA	0	0	0	0	0	0	0	1	0	0	0	0	0	1
ENSG00000259164.1,RP11-463C8.4.1,coding,chr14:76634406-76761558	NA	ENSG00000258747.1,RP11-163M18.1.1,lncRNA,chr14:44046359-44077466	ENSG00000257470.1,RP11-397H6.1.1,lncRNA,chr12:95941929-95969038	ENSG00000207863.1,MIR125B2,miRNA,chr21:16884427-16884516	NA	0	0	0	0	0	0	0	0	0	0	0	0	0	0
ENSG00000259164.1,RP11-463C8.4.1,coding,chr14:76634406-76761558	ENSG00000181752.3,OR8K5,coding,chr11:55683445-55684369	ENSG00000258747.1,RP11-163M18.1.1,lncRNA,chr14:44046359-44077466	NA	ENSG00000207726.1,MIR455,miRNA,chr9:116011534-116011630	NA	0	0	0	0	0	0	0	0	0	0	0	0	0	0
ENSG00000259164.1,RP11-463C8.4.1,coding,chr14:76634406-76761558	NA	ENSG00000258747.1,RP11-163M18.1.1,lncRNA,chr14:44046359-44077466	ENSG00000257470.1,RP11-397H6.1.1,lncRNA,chr12:95941929-95969038	ENSG00000207726.1,MIR455,miRNA,chr9:116011534-116011630	NA	0	0	0	0	0	0	0	0	0	0	0	0	0	0
ENSG00000172208.3,OR4X2,coding,chr11:48223183-48224198	ENSG00000237388.2,OR4A47,coding,chr11:48466844-48467908	ENSG00000250078.1,RP11-577G20.2.1,lncRNA,chr4:59123086-59126044	NA	ENSG00000207597.1,MIR490,miRNA,chr7:136238453-136238581	NA	0	0	0	0	0	0	0	0	0	0	0	0	0	0
ENSG00000221961.2,PRR21,coding,chr2:240629902-240631072	ENSG00000256671.3,LIMS3L,coding,chr2:110641954-110665048	ENSG00000236889.1,RP11-38J22.1.1,lncRNA,chr1:204330706-204332893	NA	ENSG00000207588.1,MIR593,miRNA,chr7:127509148-127509248	NA	0	0	0	0	0	0	0	0	0	1	0	0	0	1
ENSG00000258728.1,RP11-195F19.29.1,coding,chr9:34636641-34647110	NA	ENSG00000260450.1,RP11-523L20.1.1,lncRNA,chr16:46557083-46563099	ENSG00000230761.1,RP11-342C24.8.1,lncRNA,chr10:46218375-46229027	ENSG00000207574.1,MIR661,miRNA,chr8:145091346-145091435	NA	0	0	0	0	0	0	0	0	0	0	0	0	0	0
ENSG00000259164.1,RP11-463C8.4.1,coding,chr14:76634406-76761558	NA	ENSG00000258747.1,RP11-163M18.1.1,lncRNA,chr14:44046359-44077466	ENSG00000257470.1,RP11-397H6.1.1,lncRNA,chr12:95941929-95969038	ENSG00000215946.1,MIR941-1,miRNA,chr20:62021819-62021910	NA	0	0	0	0	0	0	0	0	0	0	0	1	0	1
ENSG00000259164.1,RP11-463C8.4.1,coding,chr14:76634406-76761558	NA	ENSG00000258747.1,RP11-163M18.1.1,lncRNA,chr14:44046359-44077466	NA	ENSG00000212044.1,MIR548U,miRNA,chr1:147589954-147590046	ENSG00000207787.1,MIR98,miRNA,chrX:53599908-53600027	0	0	0	0	0	0	0	0	0	0	0	0	0	0
ENSG00000259164.1,RP11-463C8.4.1,coding,chr14:76634406-76761558	NA	ENSG00000258747.1,RP11-163M18.1.1,lncRNA,chr14:44046359-44077466	ENSG00000257470.1,RP11-397H6.1.1,lncRNA,chr12:95941929-95969038	ENSG00000207787.1,MIR98,miRNA,chrX:53599908-53600027	NA	0	0	0	0	0	0	0	0	0	0	0	0	0	0
ENSG00000259164.1,RP11-463C8.4.1,coding,chr14:76634406-76761558	NA	ENSG00000249343.1,CTD-2275D24.2.1,lncRNA,chr5:73654066-73659878	ENSG00000248942.1,CTD-2275D24.4.1,lncRNA,chr5:73637990-73639906	ENSG00000207755.1,MIR450A2,miRNA,chrX:133502203-133502303	NA	0	0	0	0	0	0	0	0	0	0	0	0	0	0
ENSG00000259164.1,RP11-463C8.4.1,coding,chr14:76634406-76761558	NA	ENSG00000258747.1,RP11-163M18.1.1,lncRNA,chr14:44046359-44077466	ENSG00000257523.1,CTD-2384A14.2.1,lncRNA,chr14:28514792-28517881	ENSG00000251856.1,MIR449C,miRNA,chr5:54503846-54503938	NA	0	0	0	0	0	0	0	0	0	0	1	0	0	1
ENSG00000259164.1,RP11-463C8.4.1,coding,chr14:76634406-76761558	NA	ENSG00000258747.1,RP11-163M18.1.1,lncRNA,chr14:44046359-44077466	ENSG00000257523.1,CTD-2384A14.2.1,lncRNA,chr14:28514792-28517881	ENSG00000212044.1,MIR548U,miRNA,chr1:147589954-147590046	NA	0	0	0	0	0	0	0	0	0	0	1	0	0	1
ENSG00000259164.1,RP11-463C8.4.1,coding,chr14:76634406-76761558	NA	ENSG00000258747.1,RP11-163M18.1.1,lncRNA,chr14:44046359-44077466	ENSG00000229389.1,CTD-2022H16.1.1,lncRNA,chr15:28132436-28152559	ENSG00000251856.1,MIR449C,miRNA,chr5:54503846-54503938	NA	0	0	0	0	0	0	0	0	0	0	0	0	0	0
ENSG00000214819.1,CDRT15L2,coding,chr17:20423628-20424816	ENSG00000259164.1,RP11-463C8.4.1,coding,chr14:76634406-76761558	ENSG00000232225.1,RP11-143O10.1.1,lncRNA,chr13:88665101-88687145	NA	ENSG00000207944.1,MIR574,miRNA,chr4:38546047-38546143	NA	0	0	0	0	0	0	0	0	0	0	0	0	0	0
ENSG00000214819.1,CDRT15L2,coding,chr17:20423628-20424816	NA	ENSG00000233519.1,RP11-177F11.1.1,lncRNA,chr1:238630593-238631046	ENSG00000242029.1,RP11-457K10.1.1,lncRNA,chr3:110849643-111012398	ENSG00000207944.1,MIR574,miRNA,chr4:38546047-38546143	NA	0	0	0	0	0	0	0	0	0	0	1	0	0	1
ENSG00000259164.1,RP11-463C8.4.1,coding,chr14:76634406-76761558	NA	ENSG00000258747.1,RP11-163M18.1.1,lncRNA,chr14:44046359-44077466	ENSG00000250124.1,CTC-261N6.2.1,lncRNA,chr5:85712233-85713000	ENSG00000251856.1,MIR449C,miRNA,chr5:54503846-54503938	NA	0	0	0	0	0	0	0	0	0	0	1	0	0	1
ENSG00000172154.3,OR8I2,coding,chr11:55617328-55618338	ENSG00000205495.1,OR52J3,coding,chr11:5024331-5025267	ENSG00000231791.1,RP11-382D12.1.1,lncRNA,chr1:182564827-182568583	NA	ENSG00000207583.1,MIR606,miRNA,chr10:76982221-76982317	NA	0	0	0	0	0	0	0	0	0	0	0	0	0	0
ENSG00000259164.1,RP11-463C8.4.1,coding,chr14:76634406-76761558	NA	ENSG00000258747.1,RP11-163M18.1.1,lncRNA,chr14:44046359-44077466	ENSG00000248262.1,RP11-1J7.1.1,lncRNA,chr4:11525388-11530410	ENSG00000251856.1,MIR449C,miRNA,chr5:54503846-54503938	NA	0	0	0	0	0	0	0	0	0	0	0	0	0	0
ENSG00000177151.3,OR2T35,coding,chr1:246868210-246869182	ENSG00000184724.4,KRTAP6-1,coding,chr21:30907620-30911767	ENSG00000224970.1,RP11-114L10.2.1,lncRNA,chr7:142283710-142300321	NA	ENSG00000207989.1,MIR493,miRNA,chr14:100405149-100405238	NA	0	0	0	0	0	0	0	0	1	0	0	0	0	1
ENSG00000177151.3,OR2T35,coding,chr1:246868210-246869182	ENSG00000184724.4,KRTAP6-1,coding,chr21:30907620-30911767	ENSG00000231413.1,RP11-193P11.3.1,lncRNA,chr1:48317045-48320455	NA	ENSG00000207989.1,MIR493,miRNA,chr14:100405149-100405238	NA	0	0	0	0	0	0	0	0	1	0	0	0	0	1
ENSG00000177151.3,OR2T35,coding,chr1:246868210-246869182	ENSG00000184724.4,KRTAP6-1,coding,chr21:30907620-30911767	ENSG00000234172.1,AC093639.1.1,lncRNA,chr2:184477500-184522084	NA	ENSG00000207989.1,MIR493,miRNA,chr14:100405149-100405238	NA	0	0	0	0	0	0	0	0	1	0	0	0	0	1
ENSG00000177151.3,OR2T35,coding,chr1:246868210-246869182	ENSG00000184724.4,KRTAP6-1,coding,chr21:30907620-30911767	ENSG00000261313.1,RP11-2C15.1.1,lncRNA,chr16:74430028-74452266	NA	ENSG00000207989.1,MIR493,miRNA,chr14:100405149-100405238	NA	0	0	0	0	0	0	0	0	1	0	0	0	0	1
ENSG00000177151.3,OR2T35,coding,chr1:246868210-246869182	ENSG00000184724.4,KRTAP6-1,coding,chr21:30907620-30911767	ENSG00000250193.1,RP11-419L4.1.1,lncRNA,chr4:130439779-130445627	NA	ENSG00000207989.1,MIR493,miRNA,chr14:100405149-100405238	NA	0	0	0	0	0	0	0	0	1	0	0	0	0	1
ENSG00000177151.3,OR2T35,coding,chr1:246868210-246869182	NA	ENSG00000231413.1,RP11-193P11.3.1,lncRNA,chr1:48317045-48320455	ENSG00000234172.1,AC093639.1.1,lncRNA,chr2:184477500-184522084	ENSG00000207989.1,MIR493,miRNA,chr14:100405149-100405238	NA	0	0	0	0	0	0	0	0	0	0	0	0	0	0
ENSG00000184724.4,KRTAP6-1,coding,chr21:30907620-30911767	NA	ENSG00000258747.1,RP11-163M18.1.1,lncRNA,chr14:44046359-44077466	ENSG00000257470.1,RP11-397H6.1.1,lncRNA,chr12:95941929-95969038	ENSG00000207988.1,MIR576,miRNA,chr4:110629302-110629400	NA	0	0	0	0	0	0	0	1	0	0	0	0	0	1
ENSG00000259164.1,RP11-463C8.4.1,coding,chr14:76634406-76761558	ENSG00000184724.4,KRTAP6-1,coding,chr21:30907620-30911767	ENSG00000257470.1,RP11-397H6.1.1,lncRNA,chr12:95941929-95969038	NA	ENSG00000207988.1,MIR576,miRNA,chr4:110629302-110629400	NA	0	0	0	0	0	0	0	0	1	0	0	0	0	1
ENSG00000259164.1,RP11-463C8.4.1,coding,chr14:76634406-76761558	ENSG00000184724.4,KRTAP6-1,coding,chr21:30907620-30911767	ENSG00000258747.1,RP11-163M18.1.1,lncRNA,chr14:44046359-44077466	NA	ENSG00000207988.1,MIR576,miRNA,chr4:110629302-110629400	NA	0	0	0	0	0	0	0	0	1	0	0	0	0	1
ENSG00000259164.1,RP11-463C8.4.1,coding,chr14:76634406-76761558	NA	ENSG00000258747.1,RP11-163M18.1.1,lncRNA,chr14:44046359-44077466	ENSG00000257470.1,RP11-397H6.1.1,lncRNA,chr12:95941929-95969038	ENSG00000207988.1,MIR576,miRNA,chr4:110629302-110629400	NA	0	0	0	0	0	0	0	0	0	0	0	0	0	0
ENSG00000259164.1,RP11-463C8.4.1,coding,chr14:76634406-76761558	NA	ENSG00000257470.1,RP11-397H6.1.1,lncRNA,chr12:95941929-95969038	ENSG00000232597.1,AC013727.1.1,lncRNA,chr2:103839859-103863099	ENSG00000211578.1,MIR766,miRNA,chrX:118664728-118664839	NA	0	0	0	0	0	0	0	0	0	0	0	0	0	0
ENSG00000259164.1,RP11-463C8.4.1,coding,chr14:76634406-76761558	NA	ENSG00000258747.1,RP11-163M18.1.1,lncRNA,chr14:44046359-44077466	ENSG00000249111.1,RP11-622J8.1.1,lncRNA,chr4:59701146-59724459	ENSG00000251856.1,MIR449C,miRNA,chr5:54503846-54503938	NA	0	0	0	0	0	0	0	0	0	0	0	0	0	0
ENSG00000259164.1,RP11-463C8.4.1,coding,chr14:76634406-76761558	NA	ENSG00000230114.1,RP11-141A19.2.1,lncRNA,chr1:49495669-49507544	ENSG00000232170.1,GS1-756B1.2.1,lncRNA,chr10:8341299-8350274	ENSG00000221067.1,MIR1280,miRNA,chr3:129563697-129563791	NA	0	0	0	0	0	0	0	0	0	0	0	0	0	0
ENSG00000259164.1,RP11-463C8.4.1,coding,chr14:76634406-76761558	NA	ENSG00000232170.1,GS1-756B1.2.1,lncRNA,chr10:8341299-8350274	ENSG00000236653.1,AC005235.1.1,lncRNA,chr2:198872331-198948066	ENSG00000221067.1,MIR1280,miRNA,chr3:129563697-129563791	NA	0	0	0	0	0	0	0	0	0	0	0	0	0	0
ENSG00000259164.1,RP11-463C8.4.1,coding,chr14:76634406-76761558	NA	ENSG00000257470.1,RP11-397H6.1.1,lncRNA,chr12:95941929-95969038	ENSG00000232170.1,GS1-756B1.2.1,lncRNA,chr10:8341299-8350274	ENSG00000221067.1,MIR1280,miRNA,chr3:129563697-129563791	NA	0	0	0	0	0	0	0	0	0	0	0	0	0	0
ENSG00000259164.1,RP11-463C8.4.1,coding,chr14:76634406-76761558	NA	ENSG00000258747.1,RP11-163M18.1.1,lncRNA,chr14:44046359-44077466	ENSG00000232170.1,GS1-756B1.2.1,lncRNA,chr10:8341299-8350274	ENSG00000221067.1,MIR1280,miRNA,chr3:129563697-129563791	NA	0	0	0	0	0	0	0	0	0	0	0	0	0	0
ENSG00000259164.1,RP11-463C8.4.1,coding,chr14:76634406-76761558	NA	ENSG00000258747.1,RP11-163M18.1.1,lncRNA,chr14:44046359-44077466	ENSG00000257470.1,RP11-397H6.1.1,lncRNA,chr12:95941929-95969038	ENSG00000221067.1,MIR1280,miRNA,chr3:129563697-129563791	NA	0	0	0	0	0	0	0	0	0	0	0	0	0	0
ENSG00000244624.2,KRTAP20-1,coding,chr21:30910620-30910874	NA	ENSG00000259837.1,RP11-672L10.1.1,lncRNA,chr18:916083-917994	ENSG00000234938.2,AC012668.1.1,lncRNA,chr2:216103414-216118494	ENSG00000207613.1,MIR181C,miRNA,chr19:13846512-13846622	NA	0	0	0	0	0	0	0	0	0	0	0	0	0	0
ENSG00000259164.1,RP11-463C8.4.1,coding,chr14:76634406-76761558	ENSG00000244624.2,KRTAP20-1,coding,chr21:30910620-30910874	ENSG00000234938.2,AC012668.1.1,lncRNA,chr2:216103414-216118494	NA	ENSG00000207613.1,MIR181C,miRNA,chr19:13846512-13846622	NA	0	0	0	0	0	0	0	0	0	0	0	0	0	0
ENSG00000259164.1,RP11-463C8.4.1,coding,chr14:76634406-76761558	NA	ENSG00000258747.1,RP11-163M18.1.1,lncRNA,chr14:44046359-44077466	ENSG00000234938.2,AC012668.1.1,lncRNA,chr2:216103414-216118494	ENSG00000207613.1,MIR181C,miRNA,chr19:13846512-13846622	NA	0	0	0	0	0	0	0	0	0	0	0	0	0	0
ENSG00000259164.1,RP11-463C8.4.1,coding,chr14:76634406-76761558	ENSG00000244624.2,KRTAP20-1,coding,chr21:30910620-30910874	ENSG00000237119.1,RP11-305P22.5.1,lncRNA,chr20:61139807-61155660	NA	ENSG00000207613.1,MIR181C,miRNA,chr19:13846512-13846622	NA	0	0	0	0	0	0	0	0	0	0	0	0	0	0
ENSG00000259164.1,RP11-463C8.4.1,coding,chr14:76634406-76761558	NA	ENSG00000258747.1,RP11-163M18.1.1,lncRNA,chr14:44046359-44077466	ENSG00000237119.1,RP11-305P22.5.1,lncRNA,chr20:61139807-61155660	ENSG00000207613.1,MIR181C,miRNA,chr19:13846512-13846622	NA	0	0	0	0	0	0	0	0	0	0	0	0	0	0
ENSG00000259164.1,RP11-463C8.4.1,coding,chr14:76634406-76761558	NA	ENSG00000253643.1,RP11-561E1.1.1,lncRNA,chr8:24403714-24428232	ENSG00000249276.1,RP11-8L21.1.1,lncRNA,chr5:43910225-43922487	ENSG00000207755.1,MIR450A2,miRNA,chrX:133502203-133502303	NA	0	0	0	0	0	0	0	0	0	0	0	0	0	0
ENSG00000251546.1,IGKV1D-39,coding,chr2:89400495-89400995	NA	ENSG00000258747.1,RP11-163M18.1.1,lncRNA,chr14:44046359-44077466	ENSG00000257470.1,RP11-397H6.1.1,lncRNA,chr12:95941929-95969038	ENSG00000215946.1,MIR941-1,miRNA,chr20:62021819-62021910	NA	0	0	0	0	0	0	0	0	0	0	0	1	0	1
ENSG00000259164.1,RP11-463C8.4.1,coding,chr14:76634406-76761558	ENSG00000251546.1,IGKV1D-39,coding,chr2:89400495-89400995	ENSG00000257470.1,RP11-397H6.1.1,lncRNA,chr12:95941929-95969038	NA	ENSG00000215946.1,MIR941-1,miRNA,chr20:62021819-62021910	NA	0	0	0	0	0	0	0	0	0	0	0	1	0	1
ENSG00000259164.1,RP11-463C8.4.1,coding,chr14:76634406-76761558	ENSG00000251546.1,IGKV1D-39,coding,chr2:89400495-89400995	ENSG00000258747.1,RP11-163M18.1.1,lncRNA,chr14:44046359-44077466	NA	ENSG00000215946.1,MIR941-1,miRNA,chr20:62021819-62021910	NA	0	0	0	0	0	0	0	0	0	0	0	1	0	1
ENSG00000240215.3,TRBV25OR9-2,coding,chr9:33652187-33652660	NA	ENSG00000227090.1,AP000402.3.1,lncRNA,chr21:25180860-25196941	ENSG00000237919.1,RP11-181B18.1.1,lncRNA,chr1:70252252-70269493	ENSG00000208017.1,MIR140,miRNA,chr16:68524484-68524584	NA	0	0	0	0	0	0	0	0	0	0	0	0	0	0
ENSG00000259164.1,RP11-463C8.4.1,coding,chr14:76634406-76761558	ENSG00000244624.2,KRTAP20-1,coding,chr21:30910620-30910874	ENSG00000230690.1,AC013402.5.1,lncRNA,chr2:104642226-104647727	NA	ENSG00000207613.1,MIR181C,miRNA,chr19:13846512-13846622	NA	0	0	0	0	0	0	0	0	0	0	0	0	0	0
ENSG00000259164.1,RP11-463C8.4.1,coding,chr14:76634406-76761558	NA	ENSG00000258747.1,RP11-163M18.1.1,lncRNA,chr14:44046359-44077466	ENSG00000230690.1,AC013402.5.1,lncRNA,chr2:104642226-104647727	ENSG00000207613.1,MIR181C,miRNA,chr19:13846512-13846622	NA	0	0	0	0	0	0	0	0	0	0	0	0	0	0
ENSG00000197428.2,OR51D1,coding,chr11:4617520-4618644	NA	ENSG00000231791.1,RP11-382D12.1.1,lncRNA,chr1:182564827-182568583	ENSG00000231814.1,LINC00210,lncRNA,chr1:216132865-216160769	ENSG00000207583.1,MIR606,miRNA,chr10:76982221-76982317	NA	0	0	0	0	0	0	0	0	0	0	0	0	0	0
ENSG00000259164.1,RP11-463C8.4.1,coding,chr14:76634406-76761558	NA	ENSG00000258747.1,RP11-163M18.1.1,lncRNA,chr14:44046359-44077466	ENSG00000248223.1,CTD-2139B15.2.1,lncRNA,chr5:17407018-17408008	ENSG00000251856.1,MIR449C,miRNA,chr5:54503846-54503938	NA	0	0	0	0	0	0	0	0	0	0	0	0	0	0
ENSG00000256671.3,LIMS3L,coding,chr2:110641954-110665048	NA	ENSG00000236889.1,RP11-38J22.1.1,lncRNA,chr1:204330706-204332893	ENSG00000223440.1,RP11-555J4.4.1,lncRNA,chr9:32623451-32638683	ENSG00000221430.1,MIR1294,miRNA,chr5:153706858-153707000	NA	0	0	0	0	0	0	0	0	0	1	0	1	0	2
ENSG00000221961.2,PRR21,coding,chr2:240629902-240631072	ENSG00000256671.3,LIMS3L,coding,chr2:110641954-110665048	ENSG00000223440.1,RP11-555J4.4.1,lncRNA,chr9:32623451-32638683	NA	ENSG00000221430.1,MIR1294,miRNA,chr5:153706858-153707000	NA	0	0	0	0	0	0	0	0	0	0	0	1	0	1
ENSG00000221961.2,PRR21,coding,chr2:240629902-240631072	NA	ENSG00000236889.1,RP11-38J22.1.1,lncRNA,chr1:204330706-204332893	ENSG00000223440.1,RP11-555J4.4.1,lncRNA,chr9:32623451-32638683	ENSG00000221430.1,MIR1294,miRNA,chr5:153706858-153707000	NA	0	0	0	0	0	0	0	0	0	1	0	1	0	2
ENSG00000256671.3,LIMS3L,coding,chr2:110641954-110665048	NA	ENSG00000236889.1,RP11-38J22.1.1,lncRNA,chr1:204330706-204332893	NA	ENSG00000221430.1,MIR1294,miRNA,chr5:153706858-153707000	ENSG00000207588.1,MIR593,miRNA,chr7:127509148-127509248	0	0	0	0	0	0	0	0	0	1	0	1	0	2
ENSG00000221961.2,PRR21,coding,chr2:240629902-240631072	NA	ENSG00000236889.1,RP11-38J22.1.1,lncRNA,chr1:204330706-204332893	NA	ENSG00000221430.1,MIR1294,miRNA,chr5:153706858-153707000	ENSG00000207588.1,MIR593,miRNA,chr7:127509148-127509248	0	0	0	0	0	0	0	0	0	1	0	1	0	2
ENSG00000221961.2,PRR21,coding,chr2:240629902-240631072	ENSG00000256671.3,LIMS3L,coding,chr2:110641954-110665048	ENSG00000236889.1,RP11-38J22.1.1,lncRNA,chr1:204330706-204332893	NA	ENSG00000221430.1,MIR1294,miRNA,chr5:153706858-153707000	NA	0	0	0	0	0	0	0	0	0	1	0	1	0	2
ENSG00000259164.1,RP11-463C8.4.1,coding,chr14:76634406-76761558	NA	ENSG00000257470.1,RP11-397H6.1.1,lncRNA,chr12:95941929-95969038	ENSG00000233069.1,RP5-930J4.2.1,lncRNA,chr1:20931959-20933032	ENSG00000221525.1,MIR1185-1,miRNA,chr14:100579066-100579152	NA	0	0	0	0	0	0	0	0	0	0	1	0	0	1
ENSG00000259164.1,RP11-463C8.4.1,coding,chr14:76634406-76761558	NA	ENSG00000234767.1,RP11-223F20.2.1,lncRNA,chr13:65338306-65350352	ENSG00000233069.1,RP5-930J4.2.1,lncRNA,chr1:20931959-20933032	ENSG00000221525.1,MIR1185-1,miRNA,chr14:100579066-100579152	NA	0	0	0	0	0	0	0	0	0	0	1	0	0	1
ENSG00000259164.1,RP11-463C8.4.1,coding,chr14:76634406-76761558	NA	ENSG00000258747.1,RP11-163M18.1.1,lncRNA,chr14:44046359-44077466	ENSG00000233069.1,RP5-930J4.2.1,lncRNA,chr1:20931959-20933032	ENSG00000221525.1,MIR1185-1,miRNA,chr14:100579066-100579152	NA	0	0	0	0	0	0	0	0	0	0	1	0	0	1
ENSG00000249008.1,RP11-487E13.1.1,coding,chr4:178400686-178406921	NA	ENSG00000258747.1,RP11-163M18.1.1,lncRNA,chr14:44046359-44077466	ENSG00000257470.1,RP11-397H6.1.1,lncRNA,chr12:95941929-95969038	ENSG00000221525.1,MIR1185-1,miRNA,chr14:100579066-100579152	NA	0	0	0	0	0	0	0	0	0	0	0	0	0	0
ENSG00000249008.1,RP11-487E13.1.1,coding,chr4:178400686-178406921	NA	ENSG00000257470.1,RP11-397H6.1.1,lncRNA,chr12:95941929-95969038	ENSG00000249747.1,RP11-308K2.1.1,lncRNA,chr4:188360133-188367494	ENSG00000221525.1,MIR1185-1,miRNA,chr14:100579066-100579152	NA	0	0	0	0	0	0	0	0	0	0	1	0	0	1
ENSG00000259164.1,RP11-463C8.4.1,coding,chr14:76634406-76761558	ENSG00000249008.1,RP11-487E13.1.1,coding,chr4:178400686-178406921	ENSG00000257470.1,RP11-397H6.1.1,lncRNA,chr12:95941929-95969038	NA	ENSG00000221525.1,MIR1185-1,miRNA,chr14:100579066-100579152	NA	0	0	0	0	0	0	0	0	0	0	0	0	0	0
ENSG00000259164.1,RP11-463C8.4.1,coding,chr14:76634406-76761558	ENSG00000249008.1,RP11-487E13.1.1,coding,chr4:178400686-178406921	ENSG00000258747.1,RP11-163M18.1.1,lncRNA,chr14:44046359-44077466	NA	ENSG00000221525.1,MIR1185-1,miRNA,chr14:100579066-100579152	NA	0	0	0	0	0	0	0	0	0	0	0	0	0	0
ENSG00000186967.6,KRTAP19-4,coding,chr21:30791012-30791322	NA	ENSG00000234767.1,RP11-223F20.2.1,lncRNA,chr13:65338306-65350352	ENSG00000231492.2,AP003774.5.1,lncRNA,chr11:63944438-63956718	ENSG00000221525.1,MIR1185-1,miRNA,chr14:100579066-100579152	NA	0	0	0	0	0	0	0	0	0	0	0	0	0	0
ENSG00000259164.1,RP11-463C8.4.1,coding,chr14:76634406-76761558	NA	ENSG00000234767.1,RP11-223F20.2.1,lncRNA,chr13:65338306-65350352	ENSG00000225129.1,RP4-614C15.2.1,lncRNA,chr20:57360644-57366224	ENSG00000221525.1,MIR1185-1,miRNA,chr14:100579066-100579152	NA	0	0	0	0	0	0	0	0	0	0	0	0	0	0
ENSG00000259164.1,RP11-463C8.4.1,coding,chr14:76634406-76761558	NA	ENSG00000258747.1,RP11-163M18.1.1,lncRNA,chr14:44046359-44077466	ENSG00000257470.1,RP11-397H6.1.1,lncRNA,chr12:95941929-95969038	ENSG00000221525.1,MIR1185-1,miRNA,chr14:100579066-100579152	NA	0	0	0	0	0	0	0	0	0	0	0	0	0	0
ENSG00000259164.1,RP11-463C8.4.1,coding,chr14:76634406-76761558	NA	ENSG00000233193.1,AC005324.7.1,lncRNA,chr17:15605652-15607808	ENSG00000249771.1,RP11-457P14.5.1,lncRNA,chr4:41579833-41591353	ENSG00000221091.1,MIR1302-5,miRNA,chr20:48664579-48664729	NA	0	0	0	0	0	0	0	0	0	1	0	0	0	1
ENSG00000259164.1,RP11-463C8.4.1,coding,chr14:76634406-76761558	NA	ENSG00000258747.1,RP11-163M18.1.1,lncRNA,chr14:44046359-44077466	ENSG00000249771.1,RP11-457P14.5.1,lncRNA,chr4:41579833-41591353	ENSG00000221091.1,MIR1302-5,miRNA,chr20:48664579-48664729	NA	0	0	0	0	0	0	0	0	0	0	0	0	0	0
ENSG00000211783.3,TRAV9-1,coding,chr14:21349513-21349989	NA	ENSG00000231413.1,RP11-193P11.3.1,lncRNA,chr1:48317045-48320455	ENSG00000228277.1,AC112518.3.1,lncRNA,chr4:74794882-74799108	ENSG00000221091.1,MIR1302-5,miRNA,chr20:48664579-48664729	NA	0	0	0	0	0	0	0	0	0	0	0	0	0	0
ENSG00000259164.1,RP11-463C8.4.1,coding,chr14:76634406-76761558	NA	ENSG00000257470.1,RP11-397H6.1.1,lncRNA,chr12:95941929-95969038	ENSG00000228277.1,AC112518.3.1,lncRNA,chr4:74794882-74799108	ENSG00000221091.1,MIR1302-5,miRNA,chr20:48664579-48664729	NA	0	0	0	0	0	0	0	0	0	0	0	0	0	0
ENSG00000211783.3,TRAV9-1,coding,chr14:21349513-21349989	NA	ENSG00000228277.1,AC112518.3.1,lncRNA,chr4:74794882-74799108	ENSG00000234172.1,AC093639.1.1,lncRNA,chr2:184477500-184522084	ENSG00000221091.1,MIR1302-5,miRNA,chr20:48664579-48664729	NA	0	0	0	0	0	0	0	0	0	0	0	0	0	0
ENSG00000211783.3,TRAV9-1,coding,chr14:21349513-21349989	NA	ENSG00000250193.1,RP11-419L4.1.1,lncRNA,chr4:130439779-130445627	ENSG00000228277.1,AC112518.3.1,lncRNA,chr4:74794882-74799108	ENSG00000221091.1,MIR1302-5,miRNA,chr20:48664579-48664729	NA	0	0	0	0	0	0	0	0	0	0	0	0	0	0
ENSG00000259164.1,RP11-463C8.4.1,coding,chr14:76634406-76761558	NA	ENSG00000250193.1,RP11-419L4.1.1,lncRNA,chr4:130439779-130445627	ENSG00000228277.1,AC112518.3.1,lncRNA,chr4:74794882-74799108	ENSG00000221091.1,MIR1302-5,miRNA,chr20:48664579-48664729	NA	0	0	0	0	0	0	0	0	0	0	0	0	0	0
ENSG00000259164.1,RP11-463C8.4.1,coding,chr14:76634406-76761558	NA	ENSG00000258747.1,RP11-163M18.1.1,lncRNA,chr14:44046359-44077466	ENSG00000228277.1,AC112518.3.1,lncRNA,chr4:74794882-74799108	ENSG00000221091.1,MIR1302-5,miRNA,chr20:48664579-48664729	NA	0	0	0	0	0	0	0	0	0	0	0	0	0	0
ENSG00000259164.1,RP11-463C8.4.1,coding,chr14:76634406-76761558	NA	ENSG00000233193.1,AC005324.7.1,lncRNA,chr17:15605652-15607808	NA	ENSG00000207863.1,MIR125B2,miRNA,chr21:16884427-16884516	ENSG00000221091.1,MIR1302-5,miRNA,chr20:48664579-48664729	0	0	0	0	0	0	0	0	0	1	0	0	0	1
ENSG00000259164.1,RP11-463C8.4.1,coding,chr14:76634406-76761558	NA	ENSG00000257470.1,RP11-397H6.1.1,lncRNA,chr12:95941929-95969038	NA	ENSG00000207863.1,MIR125B2,miRNA,chr21:16884427-16884516	ENSG00000221091.1,MIR1302-5,miRNA,chr20:48664579-48664729	0	0	0	0	0	0	0	0	0	0	0	0	0	0
ENSG00000259164.1,RP11-463C8.4.1,coding,chr14:76634406-76761558	NA	ENSG00000258747.1,RP11-163M18.1.1,lncRNA,chr14:44046359-44077466	NA	ENSG00000207863.1,MIR125B2,miRNA,chr21:16884427-16884516	ENSG00000221091.1,MIR1302-5,miRNA,chr20:48664579-48664729	0	0	0	0	0	0	0	0	0	0	0	0	0	0
ENSG00000211783.3,TRAV9-1,coding,chr14:21349513-21349989	NA	ENSG00000231413.1,RP11-193P11.3.1,lncRNA,chr1:48317045-48320455	ENSG00000234172.1,AC093639.1.1,lncRNA,chr2:184477500-184522084	ENSG00000221091.1,MIR1302-5,miRNA,chr20:48664579-48664729	NA	0	0	0	0	0	0	0	0	0	0	0	0	0	0
ENSG00000211783.3,TRAV9-1,coding,chr14:21349513-21349989	NA	ENSG00000233193.1,AC005324.7.1,lncRNA,chr17:15605652-15607808	ENSG00000234172.1,AC093639.1.1,lncRNA,chr2:184477500-184522084	ENSG00000221091.1,MIR1302-5,miRNA,chr20:48664579-48664729	NA	0	0	0	0	0	0	0	0	0	1	0	0	0	1
ENSG00000259164.1,RP11-463C8.4.1,coding,chr14:76634406-76761558	NA	ENSG00000258747.1,RP11-163M18.1.1,lncRNA,chr14:44046359-44077466	ENSG00000257470.1,RP11-397H6.1.1,lncRNA,chr12:95941929-95969038	ENSG00000221091.1,MIR1302-5,miRNA,chr20:48664579-48664729	NA	0	0	0	0	0	0	0	0	0	0	0	0	0	0
ENSG00000258247.1,RP11-167N24.6.1,coding,chr12:94295114-94298803	NA	ENSG00000261376.1,RP11-525K10.2.1,lncRNA,chr16:78770526-78772080	ENSG00000223597.2,CTD-2296D1.5.1,lncRNA,chr5:7426229-7432903	ENSG00000207700.1,MIR145,miRNA,chr5:148790401-148790489	NA	0	0	0	0	0	0	0	0	0	0	0	0	0	0
ENSG00000259164.1,RP11-463C8.4.1,coding,chr14:76634406-76761558	NA	ENSG00000257470.1,RP11-397H6.1.1,lncRNA,chr12:95941929-95969038	ENSG00000228309.1,GS1-204I12.2.1,lncRNA,chr1:183794133-183801386	ENSG00000207863.1,MIR125B2,miRNA,chr21:16884427-16884516	NA	0	0	0	0	0	0	0	0	0	0	0	0	0	0
ENSG00000259164.1,RP11-463C8.4.1,coding,chr14:76634406-76761558	NA	ENSG00000258747.1,RP11-163M18.1.1,lncRNA,chr14:44046359-44077466	ENSG00000228309.1,GS1-204I12.2.1,lncRNA,chr1:183794133-183801386	ENSG00000207863.1,MIR125B2,miRNA,chr21:16884427-16884516	NA	0	0	0	0	0	0	0	0	0	0	0	0	0	0
ENSG00000257767.1,RP11-162P23.2.1,coding,chr12:110677852-110713605	NA	ENSG00000231912.1,RP1-249H1.2.1,lncRNA,chr6:114219724-114265249	ENSG00000223817.1,CDH23-AS1,lncRNA,chr10:72937915-72941636	ENSG00000212044.1,MIR548U,miRNA,chr1:147589954-147590046	NA	0	0	0	0	0	0	0	0	0	1	0	0	0	1
ENSG00000212725.3,KRTAP2-1,coding,chr17:36456318-36457094	NA	ENSG00000223817.1,CDH23-AS1,lncRNA,chr10:72937915-72941636	NA	ENSG00000212044.1,MIR548U,miRNA,chr1:147589954-147590046	ENSG00000207787.1,MIR98,miRNA,chrX:53599908-53600027	0	0	0	0	0	0	0	0	0	0	0	0	0	0
ENSG00000212725.3,KRTAP2-1,coding,chr17:36456318-36457094	ENSG00000257767.1,RP11-162P23.2.1,coding,chr12:110677852-110713605	ENSG00000223817.1,CDH23-AS1,lncRNA,chr10:72937915-72941636	NA	ENSG00000212044.1,MIR548U,miRNA,chr1:147589954-147590046	NA	0	0	0	0	0	0	0	0	0	0	0	0	0	0
ENSG00000150261.2,OR8K1,coding,chr11:55869996-55871083	NA	ENSG00000236828.1,DMD-AS3,lncRNA,chrX:32682977-32684438	ENSG00000225006.1,RP11-669M2.1.1,lncRNA,chr1:186744291-186772219	ENSG00000221464.1,MIR1271,miRNA,chr5:175727554-175727640	NA	0	0	0	0	0	0	0	0	0	0	0	0	0	0
ENSG00000184724.4,KRTAP6-1,coding,chr21:30907620-30911767	NA	ENSG00000248223.1,CTD-2139B15.2.1,lncRNA,chr5:17407018-17408008	NA	ENSG00000221464.1,MIR1271,miRNA,chr5:175727554-175727640	ENSG00000207989.1,MIR493,miRNA,chr14:100405149-100405238	0	0	0	0	0	0	0	1	0	0	0	0	0	1
ENSG00000184724.4,KRTAP6-1,coding,chr21:30907620-30911767	NA	ENSG00000253403.1,RP11-348M17.2.1,lncRNA,chr5:161046930-161048992	NA	ENSG00000221464.1,MIR1271,miRNA,chr5:175727554-175727640	ENSG00000207989.1,MIR493,miRNA,chr14:100405149-100405238	0	0	0	0	0	0	0	1	0	1	0	0	0	2
ENSG00000184724.4,KRTAP6-1,coding,chr21:30907620-30911767	NA	ENSG00000261313.1,RP11-2C15.1.1,lncRNA,chr16:74430028-74452266	NA	ENSG00000221464.1,MIR1271,miRNA,chr5:175727554-175727640	ENSG00000207988.1,MIR576,miRNA,chr4:110629302-110629400	0	0	0	0	0	0	0	1	0	0	0	0	0	1
ENSG00000177151.3,OR2T35,coding,chr1:246868210-246869182	ENSG00000184724.4,KRTAP6-1,coding,chr21:30907620-30911767	ENSG00000224970.1,RP11-114L10.2.1,lncRNA,chr7:142283710-142300321	NA	ENSG00000221464.1,MIR1271,miRNA,chr5:175727554-175727640	NA	0	0	0	0	0	0	0	0	1	0	0	0	0	1
ENSG00000177151.3,OR2T35,coding,chr1:246868210-246869182	ENSG00000184724.4,KRTAP6-1,coding,chr21:30907620-30911767	ENSG00000231413.1,RP11-193P11.3.1,lncRNA,chr1:48317045-48320455	NA	ENSG00000221464.1,MIR1271,miRNA,chr5:175727554-175727640	NA	0	0	0	0	0	0	0	0	1	0	0	0	0	1
ENSG00000177151.3,OR2T35,coding,chr1:246868210-246869182	ENSG00000184724.4,KRTAP6-1,coding,chr21:30907620-30911767	ENSG00000223410.1,RP1-191L6.2.1,lncRNA,chr20:38183095-38188412	NA	ENSG00000221464.1,MIR1271,miRNA,chr5:175727554-175727640	NA	0	0	0	0	0	0	0	0	1	0	0	0	0	1
ENSG00000177151.3,OR2T35,coding,chr1:246868210-246869182	ENSG00000184724.4,KRTAP6-1,coding,chr21:30907620-30911767	ENSG00000234172.1,AC093639.1.1,lncRNA,chr2:184477500-184522084	NA	ENSG00000221464.1,MIR1271,miRNA,chr5:175727554-175727640	NA	0	0	0	0	0	0	0	0	1	0	0	0	0	1
ENSG00000177151.3,OR2T35,coding,chr1:246868210-246869182	ENSG00000184724.4,KRTAP6-1,coding,chr21:30907620-30911767	ENSG00000261313.1,RP11-2C15.1.1,lncRNA,chr16:74430028-74452266	NA	ENSG00000221464.1,MIR1271,miRNA,chr5:175727554-175727640	NA	0	0	0	0	0	0	0	0	1	0	0	0	0	1
ENSG00000177151.3,OR2T35,coding,chr1:246868210-246869182	ENSG00000184724.4,KRTAP6-1,coding,chr21:30907620-30911767	ENSG00000250193.1,RP11-419L4.1.1,lncRNA,chr4:130439779-130445627	NA	ENSG00000221464.1,MIR1271,miRNA,chr5:175727554-175727640	NA	0	0	0	0	0	0	0	0	1	0	0	0	0	1
ENSG00000177151.3,OR2T35,coding,chr1:246868210-246869182	NA	ENSG00000224970.1,RP11-114L10.2.1,lncRNA,chr7:142283710-142300321	NA	ENSG00000221464.1,MIR1271,miRNA,chr5:175727554-175727640	ENSG00000207989.1,MIR493,miRNA,chr14:100405149-100405238	0	0	0	0	0	0	0	0	0	0	0	0	0	0
ENSG00000177151.3,OR2T35,coding,chr1:246868210-246869182	NA	ENSG00000231413.1,RP11-193P11.3.1,lncRNA,chr1:48317045-48320455	ENSG00000234172.1,AC093639.1.1,lncRNA,chr2:184477500-184522084	ENSG00000221464.1,MIR1271,miRNA,chr5:175727554-175727640	NA	0	0	0	0	0	0	0	0	0	0	0	0	0	0
ENSG00000177151.3,OR2T35,coding,chr1:246868210-246869182	NA	ENSG00000231413.1,RP11-193P11.3.1,lncRNA,chr1:48317045-48320455	NA	ENSG00000221464.1,MIR1271,miRNA,chr5:175727554-175727640	ENSG00000207989.1,MIR493,miRNA,chr14:100405149-100405238	0	0	0	0	0	0	0	0	0	0	0	0	0	0
ENSG00000177151.3,OR2T35,coding,chr1:246868210-246869182	NA	ENSG00000234172.1,AC093639.1.1,lncRNA,chr2:184477500-184522084	NA	ENSG00000221464.1,MIR1271,miRNA,chr5:175727554-175727640	ENSG00000207989.1,MIR493,miRNA,chr14:100405149-100405238	0	0	0	0	0	0	0	0	0	0	0	0	0	0
ENSG00000177151.3,OR2T35,coding,chr1:246868210-246869182	NA	ENSG00000261313.1,RP11-2C15.1.1,lncRNA,chr16:74430028-74452266	NA	ENSG00000221464.1,MIR1271,miRNA,chr5:175727554-175727640	ENSG00000207989.1,MIR493,miRNA,chr14:100405149-100405238	0	0	0	0	0	0	0	0	0	0	0	0	0	0
ENSG00000177151.3,OR2T35,coding,chr1:246868210-246869182	NA	ENSG00000250193.1,RP11-419L4.1.1,lncRNA,chr4:130439779-130445627	NA	ENSG00000221464.1,MIR1271,miRNA,chr5:175727554-175727640	ENSG00000207989.1,MIR493,miRNA,chr14:100405149-100405238	0	0	0	0	0	0	0	0	0	0	0	0	0	0
ENSG00000184724.4,KRTAP6-1,coding,chr21:30907620-30911767	NA	ENSG00000224970.1,RP11-114L10.2.1,lncRNA,chr7:142283710-142300321	ENSG00000228176.1,RP4-656G21.1.1,lncRNA,chr1:29954284-29954981	ENSG00000221464.1,MIR1271,miRNA,chr5:175727554-175727640	NA	0	0	0	0	0	0	0	1	0	0	0	0	0	1
ENSG00000184724.4,KRTAP6-1,coding,chr21:30907620-30911767	NA	ENSG00000224970.1,RP11-114L10.2.1,lncRNA,chr7:142283710-142300321	NA	ENSG00000221464.1,MIR1271,miRNA,chr5:175727554-175727640	ENSG00000207989.1,MIR493,miRNA,chr14:100405149-100405238	0	0	0	0	0	0	0	1	0	0	0	0	0	1
ENSG00000184724.4,KRTAP6-1,coding,chr21:30907620-30911767	ENSG00000212938.3,KRTAP6-3,coding,chr21:30886629-30887265	ENSG00000251421.1,CTC-369A16.2.1,lncRNA,chr5:123759194-123763987	NA	ENSG00000221464.1,MIR1271,miRNA,chr5:175727554-175727640	NA	0	0	0	0	0	0	0	1	0	0	0	0	0	1
ENSG00000184724.4,KRTAP6-1,coding,chr21:30907620-30911767	ENSG00000212938.3,KRTAP6-3,coding,chr21:30886629-30887265	ENSG00000261313.1,RP11-2C15.1.1,lncRNA,chr16:74430028-74452266	NA	ENSG00000221464.1,MIR1271,miRNA,chr5:175727554-175727640	NA	0	0	0	0	0	0	0	1	0	0	0	0	0	1
ENSG00000184724.4,KRTAP6-1,coding,chr21:30907620-30911767	NA	ENSG00000231413.1,RP11-193P11.3.1,lncRNA,chr1:48317045-48320455	ENSG00000234172.1,AC093639.1.1,lncRNA,chr2:184477500-184522084	ENSG00000221464.1,MIR1271,miRNA,chr5:175727554-175727640	NA	0	0	0	0	0	0	0	1	0	0	0	0	0	1
ENSG00000184724.4,KRTAP6-1,coding,chr21:30907620-30911767	NA	ENSG00000231413.1,RP11-193P11.3.1,lncRNA,chr1:48317045-48320455	NA	ENSG00000221464.1,MIR1271,miRNA,chr5:175727554-175727640	ENSG00000207989.1,MIR493,miRNA,chr14:100405149-100405238	0	0	0	0	0	0	0	1	0	0	0	0	0	1
ENSG00000184724.4,KRTAP6-1,coding,chr21:30907620-30911767	NA	ENSG00000249490.1,CTD-2333M24.1.1,lncRNA,chr5:20648490-20650631	NA	ENSG00000221464.1,MIR1271,miRNA,chr5:175727554-175727640	ENSG00000207989.1,MIR493,miRNA,chr14:100405149-100405238	0	0	0	0	0	0	0	1	0	0	0	0	0	1
ENSG00000204279.3,PAGE3,coding,chrX:55301572-55308004	ENSG00000184724.4,KRTAP6-1,coding,chr21:30907620-30911767	ENSG00000231538.1,AC068542.1.1,lncRNA,chr2:115302478-115307595	NA	ENSG00000221464.1,MIR1271,miRNA,chr5:175727554-175727640	NA	0	0	0	0	0	0	0	0	1	0	0	0	0	1
ENSG00000184724.4,KRTAP6-1,coding,chr21:30907620-30911767	NA	ENSG00000234172.1,AC093639.1.1,lncRNA,chr2:184477500-184522084	NA	ENSG00000221464.1,MIR1271,miRNA,chr5:175727554-175727640	ENSG00000207989.1,MIR493,miRNA,chr14:100405149-100405238	0	0	0	0	0	0	0	1	0	0	0	0	0	1
ENSG00000184724.4,KRTAP6-1,coding,chr21:30907620-30911767	NA	ENSG00000261313.1,RP11-2C15.1.1,lncRNA,chr16:74430028-74452266	NA	ENSG00000221464.1,MIR1271,miRNA,chr5:175727554-175727640	ENSG00000207989.1,MIR493,miRNA,chr14:100405149-100405238	0	0	0	0	0	0	0	1	0	0	0	0	0	1
ENSG00000184724.4,KRTAP6-1,coding,chr21:30907620-30911767	NA	ENSG00000250193.1,RP11-419L4.1.1,lncRNA,chr4:130439779-130445627	NA	ENSG00000221464.1,MIR1271,miRNA,chr5:175727554-175727640	ENSG00000207989.1,MIR493,miRNA,chr14:100405149-100405238	0	0	0	0	0	0	0	1	0	0	0	0	0	1
ENSG00000150261.2,OR8K1,coding,chr11:55869996-55871083	NA	ENSG00000234686.1,AC010971.1.1,lncRNA,chr7:49240278-49264958	ENSG00000231597.1,AC007557.4.1,lncRNA,chr2:217427356-217428100	ENSG00000221464.1,MIR1271,miRNA,chr5:175727554-175727640	NA	0	0	0	0	0	0	0	0	0	0	0	0	0	0
ENSG00000150261.2,OR8K1,coding,chr11:55869996-55871083	NA	ENSG00000236828.1,DMD-AS3,lncRNA,chrX:32682977-32684438	ENSG00000234686.1,AC010971.1.1,lncRNA,chr7:49240278-49264958	ENSG00000221464.1,MIR1271,miRNA,chr5:175727554-175727640	NA	0	0	0	0	0	0	0	0	0	0	0	0	0	0
ENSG00000150261.2,OR8K1,coding,chr11:55869996-55871083	NA	ENSG00000234686.1,AC010971.1.1,lncRNA,chr7:49240278-49264958	ENSG00000248338.1,RP11-472K22.2.1,lncRNA,chr4:28825117-28831882	ENSG00000221464.1,MIR1271,miRNA,chr5:175727554-175727640	NA	0	0	0	0	0	0	0	0	0	0	0	0	0	0
ENSG00000150261.2,OR8K1,coding,chr11:55869996-55871083	NA	ENSG00000233519.1,RP11-177F11.1.1,lncRNA,chr1:238630593-238631046	ENSG00000234686.1,AC010971.1.1,lncRNA,chr7:49240278-49264958	ENSG00000221464.1,MIR1271,miRNA,chr5:175727554-175727640	NA	0	0	0	0	0	0	0	0	0	0	0	0	0	0
ENSG00000150261.2,OR8K1,coding,chr11:55869996-55871083	NA	ENSG00000233519.1,RP11-177F11.1.1,lncRNA,chr1:238630593-238631046	ENSG00000231597.1,AC007557.4.1,lncRNA,chr2:217427356-217428100	ENSG00000221464.1,MIR1271,miRNA,chr5:175727554-175727640	NA	0	0	0	0	0	0	0	0	0	0	0	0	0	0
ENSG00000150261.2,OR8K1,coding,chr11:55869996-55871083	NA	ENSG00000236828.1,DMD-AS3,lncRNA,chrX:32682977-32684438	ENSG00000233519.1,RP11-177F11.1.1,lncRNA,chr1:238630593-238631046	ENSG00000221464.1,MIR1271,miRNA,chr5:175727554-175727640	NA	0	0	0	0	0	0	0	0	0	0	0	0	0	0
ENSG00000204933.1,AC005392.1,coding,chr19:48571499-48575116	NA	ENSG00000234686.1,AC010971.1.1,lncRNA,chr7:49240278-49264958	ENSG00000231597.1,AC007557.4.1,lncRNA,chr2:217427356-217428100	ENSG00000221410.1,MIR1238,miRNA,chr19:10523797-10523880	NA	0	0	0	0	0	0	0	0	0	0	0	0	0	0
ENSG00000204933.1,AC005392.1,coding,chr19:48571499-48575116	NA	ENSG00000233519.1,RP11-177F11.1.1,lncRNA,chr1:238630593-238631046	ENSG00000234686.1,AC010971.1.1,lncRNA,chr7:49240278-49264958	ENSG00000221410.1,MIR1238,miRNA,chr19:10523797-10523880	NA	0	0	0	0	0	0	0	0	0	0	0	0	0	0
ENSG00000204933.1,AC005392.1,coding,chr19:48571499-48575116	NA	ENSG00000233519.1,RP11-177F11.1.1,lncRNA,chr1:238630593-238631046	ENSG00000231597.1,AC007557.4.1,lncRNA,chr2:217427356-217428100	ENSG00000221410.1,MIR1238,miRNA,chr19:10523797-10523880	NA	0	0	0	0	0	0	0	0	0	0	0	0	0	0
ENSG00000206536.1,OR5K3,coding,chr3:99592199-99593165	NA	ENSG00000223626.1,RP11-315H15.1.1,lncRNA,chr13:112024881-112033540	ENSG00000234686.1,AC010971.1.1,lncRNA,chr7:49240278-49264958	ENSG00000221410.1,MIR1238,miRNA,chr19:10523797-10523880	NA	0	0	0	0	0	0	0	0	0	0	0	0	0	0
ENSG00000221900.3,POM121L12,coding,chr7:53070828-53072111	NA	ENSG00000223626.1,RP11-315H15.1.1,lncRNA,chr13:112024881-112033540	ENSG00000234686.1,AC010971.1.1,lncRNA,chr7:49240278-49264958	ENSG00000221410.1,MIR1238,miRNA,chr19:10523797-10523880	NA	0	0	0	0	0	0	0	1	0	0	0	0	0	1
ENSG00000253206.1,RP11-738G5.2.1,coding,chr8:50611497-50629526	NA	ENSG00000223626.1,RP11-315H15.1.1,lncRNA,chr13:112024881-112033540	ENSG00000234686.1,AC010971.1.1,lncRNA,chr7:49240278-49264958	ENSG00000221410.1,MIR1238,miRNA,chr19:10523797-10523880	NA	0	0	0	0	0	0	0	0	0	0	0	0	0	0
ENSG00000253206.1,RP11-738G5.2.1,coding,chr8:50611497-50629526	NA	ENSG00000223626.1,RP11-315H15.1.1,lncRNA,chr13:112024881-112033540	ENSG00000250078.1,RP11-577G20.2.1,lncRNA,chr4:59123086-59126044	ENSG00000221410.1,MIR1238,miRNA,chr19:10523797-10523880	NA	0	0	0	0	0	0	0	0	0	0	0	0	0	0
ENSG00000206536.1,OR5K3,coding,chr3:99592199-99593165	NA	ENSG00000223626.1,RP11-315H15.1.1,lncRNA,chr13:112024881-112033540	ENSG00000231597.1,AC007557.4.1,lncRNA,chr2:217427356-217428100	ENSG00000221410.1,MIR1238,miRNA,chr19:10523797-10523880	NA	0	0	0	0	0	0	0	0	0	0	0	0	0	0
ENSG00000221900.3,POM121L12,coding,chr7:53070828-53072111	NA	ENSG00000223626.1,RP11-315H15.1.1,lncRNA,chr13:112024881-112033540	ENSG00000231597.1,AC007557.4.1,lncRNA,chr2:217427356-217428100	ENSG00000221410.1,MIR1238,miRNA,chr19:10523797-10523880	NA	0	0	0	0	0	0	0	1	0	0	0	0	0	1
ENSG00000253206.1,RP11-738G5.2.1,coding,chr8:50611497-50629526	NA	ENSG00000223626.1,RP11-315H15.1.1,lncRNA,chr13:112024881-112033540	ENSG00000231597.1,AC007557.4.1,lncRNA,chr2:217427356-217428100	ENSG00000221410.1,MIR1238,miRNA,chr19:10523797-10523880	NA	0	0	0	0	0	0	0	0	0	0	0	0	0	0
ENSG00000182783.3,OR2T29,coding,chr1:246788406-246789420	NA	ENSG00000223626.1,RP11-315H15.1.1,lncRNA,chr13:112024881-112033540	ENSG00000231597.1,AC007557.4.1,lncRNA,chr2:217427356-217428100	ENSG00000221410.1,MIR1238,miRNA,chr19:10523797-10523880	NA	0	0	0	0	0	0	0	0	0	0	0	0	0	0
ENSG00000253206.1,RP11-738G5.2.1,coding,chr8:50611497-50629526	NA	ENSG00000223626.1,RP11-315H15.1.1,lncRNA,chr13:112024881-112033540	ENSG00000232806.1,AP001610.9.1,lncRNA,chr21:41852921-41856755	ENSG00000221410.1,MIR1238,miRNA,chr19:10523797-10523880	NA	0	0	0	0	0	0	0	0	0	0	0	0	0	0
ENSG00000206536.1,OR5K3,coding,chr3:99592199-99593165	NA	ENSG00000223626.1,RP11-315H15.1.1,lncRNA,chr13:112024881-112033540	ENSG00000234953.2,RP5-837I24.2.1,lncRNA,chr1:81752152-81795975	ENSG00000221410.1,MIR1238,miRNA,chr19:10523797-10523880	NA	0	0	0	0	0	0	0	0	0	0	1	0	0	1
ENSG00000206536.1,OR5K3,coding,chr3:99592199-99593165	NA	ENSG00000223626.1,RP11-315H15.1.1,lncRNA,chr13:112024881-112033540	ENSG00000236634.1,AC016903.1.1,lncRNA,chr2:205043043-205046805	ENSG00000221410.1,MIR1238,miRNA,chr19:10523797-10523880	NA	0	0	0	0	0	0	0	0	0	0	0	0	0	0
ENSG00000206536.1,OR5K3,coding,chr3:99592199-99593165	NA	ENSG00000223626.1,RP11-315H15.1.1,lncRNA,chr13:112024881-112033540	ENSG00000234116.1,RP11-261C10.1.1,lncRNA,chr1:241235769-241237393	ENSG00000221410.1,MIR1238,miRNA,chr19:10523797-10523880	NA	0	0	0	0	0	0	0	0	0	0	0	0	0	0
ENSG00000206536.1,OR5K3,coding,chr3:99592199-99593165	NA	ENSG00000223626.1,RP11-315H15.1.1,lncRNA,chr13:112024881-112033540	ENSG00000233519.1,RP11-177F11.1.1,lncRNA,chr1:238630593-238631046	ENSG00000221410.1,MIR1238,miRNA,chr19:10523797-10523880	NA	0	0	0	0	0	0	0	0	0	0	0	0	0	0
ENSG00000221900.3,POM121L12,coding,chr7:53070828-53072111	NA	ENSG00000223626.1,RP11-315H15.1.1,lncRNA,chr13:112024881-112033540	ENSG00000234953.2,RP5-837I24.2.1,lncRNA,chr1:81752152-81795975	ENSG00000221410.1,MIR1238,miRNA,chr19:10523797-10523880	NA	0	0	0	0	0	0	0	1	0	0	1	0	0	2
ENSG00000221900.3,POM121L12,coding,chr7:53070828-53072111	NA	ENSG00000223626.1,RP11-315H15.1.1,lncRNA,chr13:112024881-112033540	ENSG00000236634.1,AC016903.1.1,lncRNA,chr2:205043043-205046805	ENSG00000221410.1,MIR1238,miRNA,chr19:10523797-10523880	NA	0	0	0	0	0	0	0	1	0	0	0	0	0	1
ENSG00000221900.3,POM121L12,coding,chr7:53070828-53072111	NA	ENSG00000223626.1,RP11-315H15.1.1,lncRNA,chr13:112024881-112033540	ENSG00000234116.1,RP11-261C10.1.1,lncRNA,chr1:241235769-241237393	ENSG00000221410.1,MIR1238,miRNA,chr19:10523797-10523880	NA	0	0	0	0	0	0	0	1	0	0	0	0	0	1
ENSG00000221900.3,POM121L12,coding,chr7:53070828-53072111	NA	ENSG00000223626.1,RP11-315H15.1.1,lncRNA,chr13:112024881-112033540	ENSG00000233519.1,RP11-177F11.1.1,lncRNA,chr1:238630593-238631046	ENSG00000221410.1,MIR1238,miRNA,chr19:10523797-10523880	NA	0	0	0	0	0	0	0	1	0	0	0	0	0	1
ENSG00000253206.1,RP11-738G5.2.1,coding,chr8:50611497-50629526	NA	ENSG00000223626.1,RP11-315H15.1.1,lncRNA,chr13:112024881-112033540	ENSG00000234953.2,RP5-837I24.2.1,lncRNA,chr1:81752152-81795975	ENSG00000221410.1,MIR1238,miRNA,chr19:10523797-10523880	NA	0	0	0	0	0	0	0	0	0	0	1	0	0	1
ENSG00000253206.1,RP11-738G5.2.1,coding,chr8:50611497-50629526	NA	ENSG00000223626.1,RP11-315H15.1.1,lncRNA,chr13:112024881-112033540	ENSG00000236634.1,AC016903.1.1,lncRNA,chr2:205043043-205046805	ENSG00000221410.1,MIR1238,miRNA,chr19:10523797-10523880	NA	0	0	0	0	0	0	0	0	0	0	0	0	0	0
ENSG00000253206.1,RP11-738G5.2.1,coding,chr8:50611497-50629526	NA	ENSG00000223626.1,RP11-315H15.1.1,lncRNA,chr13:112024881-112033540	ENSG00000234116.1,RP11-261C10.1.1,lncRNA,chr1:241235769-241237393	ENSG00000221410.1,MIR1238,miRNA,chr19:10523797-10523880	NA	0	0	0	0	0	0	0	0	0	0	0	0	0	0
ENSG00000253206.1,RP11-738G5.2.1,coding,chr8:50611497-50629526	NA	ENSG00000223626.1,RP11-315H15.1.1,lncRNA,chr13:112024881-112033540	ENSG00000233519.1,RP11-177F11.1.1,lncRNA,chr1:238630593-238631046	ENSG00000221410.1,MIR1238,miRNA,chr19:10523797-10523880	NA	0	0	0	0	0	0	0	0	0	0	0	0	0	0
ENSG00000182783.3,OR2T29,coding,chr1:246788406-246789420	NA	ENSG00000223626.1,RP11-315H15.1.1,lncRNA,chr13:112024881-112033540	ENSG00000234953.2,RP5-837I24.2.1,lncRNA,chr1:81752152-81795975	ENSG00000221410.1,MIR1238,miRNA,chr19:10523797-10523880	NA	0	0	0	0	0	0	0	0	0	0	1	0	0	1
ENSG00000182783.3,OR2T29,coding,chr1:246788406-246789420	NA	ENSG00000223626.1,RP11-315H15.1.1,lncRNA,chr13:112024881-112033540	ENSG00000236634.1,AC016903.1.1,lncRNA,chr2:205043043-205046805	ENSG00000221410.1,MIR1238,miRNA,chr19:10523797-10523880	NA	0	0	0	0	0	0	0	0	0	0	0	0	0	0
ENSG00000182783.3,OR2T29,coding,chr1:246788406-246789420	NA	ENSG00000223626.1,RP11-315H15.1.1,lncRNA,chr13:112024881-112033540	ENSG00000234116.1,RP11-261C10.1.1,lncRNA,chr1:241235769-241237393	ENSG00000221410.1,MIR1238,miRNA,chr19:10523797-10523880	NA	0	0	0	0	0	0	0	0	0	0	0	0	0	0
ENSG00000182783.3,OR2T29,coding,chr1:246788406-246789420	NA	ENSG00000223626.1,RP11-315H15.1.1,lncRNA,chr13:112024881-112033540	ENSG00000233519.1,RP11-177F11.1.1,lncRNA,chr1:238630593-238631046	ENSG00000221410.1,MIR1238,miRNA,chr19:10523797-10523880	NA	0	0	0	0	0	0	0	0	0	0	0	0	0	0
ENSG00000176742.1,OR51V1,coding,chr11:5177540-5178506	NA	ENSG00000234686.1,AC010971.1.1,lncRNA,chr7:49240278-49264958	ENSG00000231597.1,AC007557.4.1,lncRNA,chr2:217427356-217428100	ENSG00000221410.1,MIR1238,miRNA,chr19:10523797-10523880	NA	0	0	0	0	0	0	0	0	0	0	0	0	0	0
ENSG00000176742.1,OR51V1,coding,chr11:5177540-5178506	NA	ENSG00000234686.1,AC010971.1.1,lncRNA,chr7:49240278-49264958	ENSG00000251376.1,CTD-2313F11.2.1,lncRNA,chr5:54386012-54386725	ENSG00000221410.1,MIR1238,miRNA,chr19:10523797-10523880	NA	0	0	0	0	0	0	0	0	0	0	0	0	0	0
ENSG00000176742.1,OR51V1,coding,chr11:5177540-5178506	NA	ENSG00000223880.1,RP11-159J2.2.1,lncRNA,chr13:74722616-74724149	ENSG00000234686.1,AC010971.1.1,lncRNA,chr7:49240278-49264958	ENSG00000221410.1,MIR1238,miRNA,chr19:10523797-10523880	NA	0	0	0	0	0	0	0	0	0	0	0	0	0	0
ENSG00000176742.1,OR51V1,coding,chr11:5177540-5178506	ENSG00000150261.2,OR8K1,coding,chr11:55869996-55871083	ENSG00000234686.1,AC010971.1.1,lncRNA,chr7:49240278-49264958	NA	ENSG00000221410.1,MIR1238,miRNA,chr19:10523797-10523880	NA	0	0	0	0	0	0	0	0	0	0	0	0	0	0
ENSG00000176742.1,OR51V1,coding,chr11:5177540-5178506	NA	ENSG00000233519.1,RP11-177F11.1.1,lncRNA,chr1:238630593-238631046	ENSG00000234686.1,AC010971.1.1,lncRNA,chr7:49240278-49264958	ENSG00000221410.1,MIR1238,miRNA,chr19:10523797-10523880	NA	0	0	0	0	0	0	0	0	0	0	0	0	0	0
ENSG00000176742.1,OR51V1,coding,chr11:5177540-5178506	NA	ENSG00000251376.1,CTD-2313F11.2.1,lncRNA,chr5:54386012-54386725	ENSG00000231597.1,AC007557.4.1,lncRNA,chr2:217427356-217428100	ENSG00000221410.1,MIR1238,miRNA,chr19:10523797-10523880	NA	0	0	0	0	0	0	0	0	0	0	0	0	0	0
ENSG00000176742.1,OR51V1,coding,chr11:5177540-5178506	NA	ENSG00000223880.1,RP11-159J2.2.1,lncRNA,chr13:74722616-74724149	ENSG00000231597.1,AC007557.4.1,lncRNA,chr2:217427356-217428100	ENSG00000221410.1,MIR1238,miRNA,chr19:10523797-10523880	NA	0	0	0	0	0	0	0	0	0	0	0	0	0	0
ENSG00000176742.1,OR51V1,coding,chr11:5177540-5178506	ENSG00000150261.2,OR8K1,coding,chr11:55869996-55871083	ENSG00000231597.1,AC007557.4.1,lncRNA,chr2:217427356-217428100	NA	ENSG00000221410.1,MIR1238,miRNA,chr19:10523797-10523880	NA	0	0	0	0	0	0	0	0	0	0	0	0	0	0
ENSG00000176742.1,OR51V1,coding,chr11:5177540-5178506	NA	ENSG00000233519.1,RP11-177F11.1.1,lncRNA,chr1:238630593-238631046	ENSG00000231597.1,AC007557.4.1,lncRNA,chr2:217427356-217428100	ENSG00000221410.1,MIR1238,miRNA,chr19:10523797-10523880	NA	0	0	0	0	0	0	0	0	0	0	0	0	0	0
ENSG00000176742.1,OR51V1,coding,chr11:5177540-5178506	NA	ENSG00000236634.1,AC016903.1.1,lncRNA,chr2:205043043-205046805	ENSG00000251376.1,CTD-2313F11.2.1,lncRNA,chr5:54386012-54386725	ENSG00000221410.1,MIR1238,miRNA,chr19:10523797-10523880	NA	0	0	0	0	0	0	0	0	0	0	0	0	0	0
ENSG00000176742.1,OR51V1,coding,chr11:5177540-5178506	NA	ENSG00000234116.1,RP11-261C10.1.1,lncRNA,chr1:241235769-241237393	ENSG00000251376.1,CTD-2313F11.2.1,lncRNA,chr5:54386012-54386725	ENSG00000221410.1,MIR1238,miRNA,chr19:10523797-10523880	NA	0	0	0	0	0	0	0	0	0	0	0	0	0	0
ENSG00000176742.1,OR51V1,coding,chr11:5177540-5178506	NA	ENSG00000233519.1,RP11-177F11.1.1,lncRNA,chr1:238630593-238631046	ENSG00000251376.1,CTD-2313F11.2.1,lncRNA,chr5:54386012-54386725	ENSG00000221410.1,MIR1238,miRNA,chr19:10523797-10523880	NA	0	0	0	0	0	0	0	0	0	0	0	0	0	0
ENSG00000176742.1,OR51V1,coding,chr11:5177540-5178506	NA	ENSG00000236634.1,AC016903.1.1,lncRNA,chr2:205043043-205046805	ENSG00000223880.1,RP11-159J2.2.1,lncRNA,chr13:74722616-74724149	ENSG00000221410.1,MIR1238,miRNA,chr19:10523797-10523880	NA	0	0	0	0	0	0	0	0	0	0	0	0	0	0
ENSG00000176742.1,OR51V1,coding,chr11:5177540-5178506	NA	ENSG00000223880.1,RP11-159J2.2.1,lncRNA,chr13:74722616-74724149	ENSG00000234116.1,RP11-261C10.1.1,lncRNA,chr1:241235769-241237393	ENSG00000221410.1,MIR1238,miRNA,chr19:10523797-10523880	NA	0	0	0	0	0	0	0	0	0	0	0	0	0	0
ENSG00000176742.1,OR51V1,coding,chr11:5177540-5178506	NA	ENSG00000223880.1,RP11-159J2.2.1,lncRNA,chr13:74722616-74724149	ENSG00000233519.1,RP11-177F11.1.1,lncRNA,chr1:238630593-238631046	ENSG00000221410.1,MIR1238,miRNA,chr19:10523797-10523880	NA	0	0	0	0	0	0	0	0	0	0	0	0	0	0
ENSG00000176742.1,OR51V1,coding,chr11:5177540-5178506	ENSG00000150261.2,OR8K1,coding,chr11:55869996-55871083	ENSG00000236634.1,AC016903.1.1,lncRNA,chr2:205043043-205046805	NA	ENSG00000221410.1,MIR1238,miRNA,chr19:10523797-10523880	NA	0	0	0	0	0	0	0	0	0	0	0	0	0	0
ENSG00000176742.1,OR51V1,coding,chr11:5177540-5178506	ENSG00000150261.2,OR8K1,coding,chr11:55869996-55871083	ENSG00000234116.1,RP11-261C10.1.1,lncRNA,chr1:241235769-241237393	NA	ENSG00000221410.1,MIR1238,miRNA,chr19:10523797-10523880	NA	0	0	0	0	0	0	0	0	0	0	0	0	0	0
ENSG00000176742.1,OR51V1,coding,chr11:5177540-5178506	ENSG00000150261.2,OR8K1,coding,chr11:55869996-55871083	ENSG00000233519.1,RP11-177F11.1.1,lncRNA,chr1:238630593-238631046	NA	ENSG00000221410.1,MIR1238,miRNA,chr19:10523797-10523880	NA	0	0	0	0	0	0	0	0	0	0	0	0	0	0
ENSG00000150261.2,OR8K1,coding,chr11:55869996-55871083	NA	ENSG00000253713.1,CTC-264O10.2.1,lncRNA,chr5:166475900-166479168	ENSG00000236436.1,AC012361.1.1,lncRNA,chr2:20923011-20924902	ENSG00000221410.1,MIR1238,miRNA,chr19:10523797-10523880	NA	0	0	0	0	0	0	0	0	0	0	0	0	0	0
ENSG00000150261.2,OR8K1,coding,chr11:55869996-55871083	NA	ENSG00000249545.1,CTC-558O19.1.1,lncRNA,chr5:94340610-94342353	ENSG00000236436.1,AC012361.1.1,lncRNA,chr2:20923011-20924902	ENSG00000221410.1,MIR1238,miRNA,chr19:10523797-10523880	NA	0	0	0	0	0	0	0	0	0	0	0	0	0	0
ENSG00000150261.2,OR8K1,coding,chr11:55869996-55871083	NA	ENSG00000248261.1,CTD-2333K2.1.1,lncRNA,chr5:101507679-101510175	ENSG00000236436.1,AC012361.1.1,lncRNA,chr2:20923011-20924902	ENSG00000221410.1,MIR1238,miRNA,chr19:10523797-10523880	NA	0	0	0	0	0	0	0	0	0	0	0	0	0	0
ENSG00000150261.2,OR8K1,coding,chr11:55869996-55871083	NA	ENSG00000236634.1,AC016903.1.1,lncRNA,chr2:205043043-205046805	ENSG00000236436.1,AC012361.1.1,lncRNA,chr2:20923011-20924902	ENSG00000221410.1,MIR1238,miRNA,chr19:10523797-10523880	NA	0	0	0	0	0	0	0	0	0	0	0	0	0	0
ENSG00000150261.2,OR8K1,coding,chr11:55869996-55871083	NA	ENSG00000234116.1,RP11-261C10.1.1,lncRNA,chr1:241235769-241237393	ENSG00000236436.1,AC012361.1.1,lncRNA,chr2:20923011-20924902	ENSG00000221410.1,MIR1238,miRNA,chr19:10523797-10523880	NA	0	0	0	0	0	0	0	0	0	0	0	0	0	0
ENSG00000150261.2,OR8K1,coding,chr11:55869996-55871083	NA	ENSG00000233519.1,RP11-177F11.1.1,lncRNA,chr1:238630593-238631046	ENSG00000236436.1,AC012361.1.1,lncRNA,chr2:20923011-20924902	ENSG00000221410.1,MIR1238,miRNA,chr19:10523797-10523880	NA	0	0	0	0	0	0	0	0	0	0	0	0	0	0
ENSG00000249008.1,RP11-487E13.1.1,coding,chr4:178400686-178406921	NA	ENSG00000253947.1,CTB-77H17.1.1,lncRNA,chr5:167324769-167326669	ENSG00000249545.1,CTC-558O19.1.1,lncRNA,chr5:94340610-94342353	ENSG00000221410.1,MIR1238,miRNA,chr19:10523797-10523880	NA	0	0	0	0	0	0	0	0	0	0	0	0	0	0
ENSG00000249008.1,RP11-487E13.1.1,coding,chr4:178400686-178406921	NA	ENSG00000254753.1,RP11-480O10.1.1,lncRNA,chr8:13745980-13750989	ENSG00000249545.1,CTC-558O19.1.1,lncRNA,chr5:94340610-94342353	ENSG00000221410.1,MIR1238,miRNA,chr19:10523797-10523880	NA	0	0	0	0	0	0	0	0	0	0	0	0	0	0
ENSG00000206536.1,OR5K3,coding,chr3:99592199-99593165	NA	ENSG00000234686.1,AC010971.1.1,lncRNA,chr7:49240278-49264958	ENSG00000231597.1,AC007557.4.1,lncRNA,chr2:217427356-217428100	ENSG00000221410.1,MIR1238,miRNA,chr19:10523797-10523880	NA	0	0	0	0	0	0	0	0	0	0	0	0	0	0
ENSG00000221900.3,POM121L12,coding,chr7:53070828-53072111	NA	ENSG00000234686.1,AC010971.1.1,lncRNA,chr7:49240278-49264958	ENSG00000231597.1,AC007557.4.1,lncRNA,chr2:217427356-217428100	ENSG00000221410.1,MIR1238,miRNA,chr19:10523797-10523880	NA	0	0	0	0	0	0	0	1	0	0	0	0	0	1
ENSG00000253206.1,RP11-738G5.2.1,coding,chr8:50611497-50629526	NA	ENSG00000234686.1,AC010971.1.1,lncRNA,chr7:49240278-49264958	ENSG00000231597.1,AC007557.4.1,lncRNA,chr2:217427356-217428100	ENSG00000221410.1,MIR1238,miRNA,chr19:10523797-10523880	NA	0	0	0	0	0	0	0	0	0	0	0	0	0	0
ENSG00000259680.2,AC136428.1.1,coding,chr16:33554544-33555426	NA	ENSG00000234686.1,AC010971.1.1,lncRNA,chr7:49240278-49264958	ENSG00000231597.1,AC007557.4.1,lncRNA,chr2:217427356-217428100	ENSG00000221410.1,MIR1238,miRNA,chr19:10523797-10523880	NA	0	0	0	0	0	0	0	0	0	0	0	0	0	0
ENSG00000150261.2,OR8K1,coding,chr11:55869996-55871083	NA	ENSG00000234686.1,AC010971.1.1,lncRNA,chr7:49240278-49264958	ENSG00000231597.1,AC007557.4.1,lncRNA,chr2:217427356-217428100	ENSG00000221410.1,MIR1238,miRNA,chr19:10523797-10523880	NA	0	0	0	0	0	0	0	0	0	0	0	0	0	0
ENSG00000206536.1,OR5K3,coding,chr3:99592199-99593165	NA	ENSG00000233519.1,RP11-177F11.1.1,lncRNA,chr1:238630593-238631046	ENSG00000234686.1,AC010971.1.1,lncRNA,chr7:49240278-49264958	ENSG00000221410.1,MIR1238,miRNA,chr19:10523797-10523880	NA	0	0	0	0	0	0	0	0	0	0	0	0	0	0
ENSG00000221900.3,POM121L12,coding,chr7:53070828-53072111	NA	ENSG00000233519.1,RP11-177F11.1.1,lncRNA,chr1:238630593-238631046	ENSG00000234686.1,AC010971.1.1,lncRNA,chr7:49240278-49264958	ENSG00000221410.1,MIR1238,miRNA,chr19:10523797-10523880	NA	0	0	0	0	0	0	0	1	0	0	0	0	0	1
ENSG00000253206.1,RP11-738G5.2.1,coding,chr8:50611497-50629526	NA	ENSG00000233519.1,RP11-177F11.1.1,lncRNA,chr1:238630593-238631046	ENSG00000234686.1,AC010971.1.1,lncRNA,chr7:49240278-49264958	ENSG00000221410.1,MIR1238,miRNA,chr19:10523797-10523880	NA	0	0	0	0	0	0	0	0	0	0	0	0	0	0
ENSG00000259680.2,AC136428.1.1,coding,chr16:33554544-33555426	NA	ENSG00000233519.1,RP11-177F11.1.1,lncRNA,chr1:238630593-238631046	ENSG00000234686.1,AC010971.1.1,lncRNA,chr7:49240278-49264958	ENSG00000221410.1,MIR1238,miRNA,chr19:10523797-10523880	NA	0	0	0	0	0	0	0	0	0	0	0	0	0	0
ENSG00000150261.2,OR8K1,coding,chr11:55869996-55871083	NA	ENSG00000233519.1,RP11-177F11.1.1,lncRNA,chr1:238630593-238631046	ENSG00000234686.1,AC010971.1.1,lncRNA,chr7:49240278-49264958	ENSG00000221410.1,MIR1238,miRNA,chr19:10523797-10523880	NA	0	0	0	0	0	0	0	0	0	0	0	0	0	0
ENSG00000206536.1,OR5K3,coding,chr3:99592199-99593165	NA	ENSG00000233519.1,RP11-177F11.1.1,lncRNA,chr1:238630593-238631046	ENSG00000231597.1,AC007557.4.1,lncRNA,chr2:217427356-217428100	ENSG00000221410.1,MIR1238,miRNA,chr19:10523797-10523880	NA	0	0	0	0	0	0	0	0	0	0	0	0	0	0
ENSG00000221900.3,POM121L12,coding,chr7:53070828-53072111	NA	ENSG00000233519.1,RP11-177F11.1.1,lncRNA,chr1:238630593-238631046	ENSG00000231597.1,AC007557.4.1,lncRNA,chr2:217427356-217428100	ENSG00000221410.1,MIR1238,miRNA,chr19:10523797-10523880	NA	0	0	0	0	0	0	0	1	0	0	0	0	0	1
ENSG00000253206.1,RP11-738G5.2.1,coding,chr8:50611497-50629526	NA	ENSG00000233519.1,RP11-177F11.1.1,lncRNA,chr1:238630593-238631046	ENSG00000231597.1,AC007557.4.1,lncRNA,chr2:217427356-217428100	ENSG00000221410.1,MIR1238,miRNA,chr19:10523797-10523880	NA	0	0	0	0	0	0	0	0	0	0	0	0	0	0
ENSG00000259680.2,AC136428.1.1,coding,chr16:33554544-33555426	NA	ENSG00000233519.1,RP11-177F11.1.1,lncRNA,chr1:238630593-238631046	ENSG00000231597.1,AC007557.4.1,lncRNA,chr2:217427356-217428100	ENSG00000221410.1,MIR1238,miRNA,chr19:10523797-10523880	NA	0	0	0	0	0	0	0	0	0	0	0	0	0	0
ENSG00000182783.3,OR2T29,coding,chr1:246788406-246789420	NA	ENSG00000233519.1,RP11-177F11.1.1,lncRNA,chr1:238630593-238631046	ENSG00000231597.1,AC007557.4.1,lncRNA,chr2:217427356-217428100	ENSG00000221410.1,MIR1238,miRNA,chr19:10523797-10523880	NA	0	0	0	0	0	0	0	0	0	0	0	0	0	0
ENSG00000150261.2,OR8K1,coding,chr11:55869996-55871083	NA	ENSG00000233519.1,RP11-177F11.1.1,lncRNA,chr1:238630593-238631046	ENSG00000231597.1,AC007557.4.1,lncRNA,chr2:217427356-217428100	ENSG00000221410.1,MIR1238,miRNA,chr19:10523797-10523880	NA	0	0	0	0	0	0	0	0	0	0	0	0	0	0
ENSG00000206536.1,OR5K3,coding,chr3:99592199-99593165	NA	ENSG00000233519.1,RP11-177F11.1.1,lncRNA,chr1:238630593-238631046	ENSG00000249545.1,CTC-558O19.1.1,lncRNA,chr5:94340610-94342353	ENSG00000221410.1,MIR1238,miRNA,chr19:10523797-10523880	NA	0	0	0	0	0	0	0	0	0	0	0	0	0	0
ENSG00000221900.3,POM121L12,coding,chr7:53070828-53072111	NA	ENSG00000233519.1,RP11-177F11.1.1,lncRNA,chr1:238630593-238631046	ENSG00000249545.1,CTC-558O19.1.1,lncRNA,chr5:94340610-94342353	ENSG00000221410.1,MIR1238,miRNA,chr19:10523797-10523880	NA	0	0	0	0	0	0	0	1	0	0	0	0	0	1
ENSG00000150261.2,OR8K1,coding,chr11:55869996-55871083	NA	ENSG00000233519.1,RP11-177F11.1.1,lncRNA,chr1:238630593-238631046	ENSG00000249545.1,CTC-558O19.1.1,lncRNA,chr5:94340610-94342353	ENSG00000221410.1,MIR1238,miRNA,chr19:10523797-10523880	NA	0	0	0	0	0	0	0	0	0	0	0	0	0	0
ENSG00000253206.1,RP11-738G5.2.1,coding,chr8:50611497-50629526	NA	ENSG00000232806.1,AP001610.9.1,lncRNA,chr21:41852921-41856755	ENSG00000233519.1,RP11-177F11.1.1,lncRNA,chr1:238630593-238631046	ENSG00000221410.1,MIR1238,miRNA,chr19:10523797-10523880	NA	0	0	0	0	0	0	0	0	0	0	0	0	0	0
ENSG00000259680.2,AC136428.1.1,coding,chr16:33554544-33555426	NA	ENSG00000232806.1,AP001610.9.1,lncRNA,chr21:41852921-41856755	ENSG00000233519.1,RP11-177F11.1.1,lncRNA,chr1:238630593-238631046	ENSG00000221410.1,MIR1238,miRNA,chr19:10523797-10523880	NA	0	0	0	0	0	0	0	0	0	0	0	0	0	0
ENSG00000215547.1,DEFB115,coding,chr20:29309127-29311096	NA	ENSG00000260921.1,RP11-989E6.8.1,lncRNA,chr16:32914358-32915592	ENSG00000231791.1,RP11-382D12.1.1,lncRNA,chr1:182564827-182568583	ENSG00000207583.1,MIR606,miRNA,chr10:76982221-76982317	NA	0	0	0	0	0	0	0	0	0	0	0	0	0	0
ENSG00000197428.2,OR51D1,coding,chr11:4617520-4618644	NA	ENSG00000260921.1,RP11-989E6.8.1,lncRNA,chr16:32914358-32915592	ENSG00000231791.1,RP11-382D12.1.1,lncRNA,chr1:182564827-182568583	ENSG00000207583.1,MIR606,miRNA,chr10:76982221-76982317	NA	0	0	0	0	0	0	0	0	0	0	0	0	0	0
ENSG00000215547.1,DEFB115,coding,chr20:29309127-29311096	ENSG00000197428.2,OR51D1,coding,chr11:4617520-4618644	ENSG00000260921.1,RP11-989E6.8.1,lncRNA,chr16:32914358-32915592	NA	ENSG00000207583.1,MIR606,miRNA,chr10:76982221-76982317	NA	0	0	0	0	0	0	0	0	0	0	0	0	0	0
ENSG00000244624.2,KRTAP20-1,coding,chr21:30910620-30910874	NA	ENSG00000234686.1,AC010971.1.1,lncRNA,chr7:49240278-49264958	NA	ENSG00000208033.1,MIR609,miRNA,chr10:105968536-105968631	ENSG00000207613.1,MIR181C,miRNA,chr19:13846512-13846622	0	0	0	0	0	0	0	0	0	0	0	0	0	0
ENSG00000244624.2,KRTAP20-1,coding,chr21:30910620-30910874	NA	ENSG00000236828.1,DMD-AS3,lncRNA,chrX:32682977-32684438	ENSG00000234686.1,AC010971.1.1,lncRNA,chr7:49240278-49264958	ENSG00000208033.1,MIR609,miRNA,chr10:105968536-105968631	NA	0	0	0	0	0	0	0	0	0	0	0	0	0	0
ENSG00000244624.2,KRTAP20-1,coding,chr21:30910620-30910874	NA	ENSG00000234686.1,AC010971.1.1,lncRNA,chr7:49240278-49264958	ENSG00000260851.1,RP11-403P17.5.1,lncRNA,chr16:65061247-65108606	ENSG00000208033.1,MIR609,miRNA,chr10:105968536-105968631	NA	0	0	0	0	0	0	0	0	0	0	0	0	0	0
ENSG00000259164.1,RP11-463C8.4.1,coding,chr14:76634406-76761558	NA	ENSG00000258747.1,RP11-163M18.1.1,lncRNA,chr14:44046359-44077466	ENSG00000257470.1,RP11-397H6.1.1,lncRNA,chr12:95941929-95969038	ENSG00000221537.1,MIR548H1,miRNA,chr14:63631494-63631596	NA	0	0	0	0	0	0	0	0	0	0	0	0	0	0
ENSG00000214819.1,CDRT15L2,coding,chr17:20423628-20424816	ENSG00000186967.6,KRTAP19-4,coding,chr21:30791012-30791322	ENSG00000224932.1,AC107399.2.1,lncRNA,chr4:118455200-118501243	NA	ENSG00000207944.1,MIR574,miRNA,chr4:38546047-38546143	NA	0	0	0	0	0	0	0	0	0	0	0	0	0	0
ENSG00000214819.1,CDRT15L2,coding,chr17:20423628-20424816	NA	ENSG00000233519.1,RP11-177F11.1.1,lncRNA,chr1:238630593-238631046	ENSG00000224932.1,AC107399.2.1,lncRNA,chr4:118455200-118501243	ENSG00000207944.1,MIR574,miRNA,chr4:38546047-38546143	NA	0	0	0	0	0	0	0	0	0	0	0	0	0	0
ENSG00000244624.2,KRTAP20-1,coding,chr21:30910620-30910874	NA	ENSG00000257587.1,RP11-711C17.1.1,lncRNA,chr12:72586986-72599384	ENSG00000230690.1,AC013402.5.1,lncRNA,chr2:104642226-104647727	ENSG00000207613.1,MIR181C,miRNA,chr19:13846512-13846622	NA	0	0	0	0	0	0	0	0	0	0	0	0	0	0
ENSG00000244624.2,KRTAP20-1,coding,chr21:30910620-30910874	NA	ENSG00000234686.1,AC010971.1.1,lncRNA,chr7:49240278-49264958	ENSG00000257587.1,RP11-711C17.1.1,lncRNA,chr12:72586986-72599384	ENSG00000207613.1,MIR181C,miRNA,chr19:13846512-13846622	NA	0	0	0	0	0	0	0	0	0	0	0	0	0	0
ENSG00000260836.1,RP11-152F13.10.1,coding,chr15:81005837-81021737	ENSG00000205495.1,OR52J3,coding,chr11:5024331-5025267	ENSG00000258107.1,RP11-260G13.1.1,lncRNA,chr14:28929302-28975369	NA	ENSG00000207583.1,MIR606,miRNA,chr10:76982221-76982317	NA	0	0	0	0	0	0	0	0	0	0	0	0	0	0
ENSG00000259164.1,RP11-463C8.4.1,coding,chr14:76634406-76761558	ENSG00000260836.1,RP11-152F13.10.1,coding,chr15:81005837-81021737	ENSG00000258747.1,RP11-163M18.1.1,lncRNA,chr14:44046359-44077466	NA	ENSG00000207863.1,MIR125B2,miRNA,chr21:16884427-16884516	NA	0	0	0	0	0	0	0	0	0	0	0	0	0	0
ENSG00000259164.1,RP11-463C8.4.1,coding,chr14:76634406-76761558	ENSG00000260836.1,RP11-152F13.10.1,coding,chr15:81005837-81021737	ENSG00000258747.1,RP11-163M18.1.1,lncRNA,chr14:44046359-44077466	NA	ENSG00000212044.1,MIR548U,miRNA,chr1:147589954-147590046	NA	0	0	0	0	0	0	0	0	0	0	0	0	0	0
ENSG00000260836.1,RP11-152F13.10.1,coding,chr15:81005837-81021737	ENSG00000205495.1,OR52J3,coding,chr11:5024331-5025267	ENSG00000243497.1,RP13-503K1.4.1,lncRNA,chr3:95277875-95283355	NA	ENSG00000207583.1,MIR606,miRNA,chr10:76982221-76982317	NA	0	0	0	0	0	0	0	0	0	1	0	0	0	1
ENSG00000260836.1,RP11-152F13.10.1,coding,chr15:81005837-81021737	ENSG00000205495.1,OR52J3,coding,chr11:5024331-5025267	ENSG00000255528.1,RP11-25I9.2.1,lncRNA,chr11:108378401-108413904	NA	ENSG00000207583.1,MIR606,miRNA,chr10:76982221-76982317	NA	0	0	0	0	0	0	0	0	0	0	0	0	0	0
ENSG00000259164.1,RP11-463C8.4.1,coding,chr14:76634406-76761558	NA	ENSG00000257583.1,RP11-167N24.4.1,lncRNA,chr12:94306505-94323411	ENSG00000250124.1,CTC-261N6.2.1,lncRNA,chr5:85712233-85713000	ENSG00000251856.1,MIR449C,miRNA,chr5:54503846-54503938	NA	0	0	0	0	0	0	0	0	0	0	1	0	0	1
ENSG00000259164.1,RP11-463C8.4.1,coding,chr14:76634406-76761558	ENSG00000181785.1,OR5AS1,coding,chr11:55554470-55555445	ENSG00000257583.1,RP11-167N24.4.1,lncRNA,chr12:94306505-94323411	NA	ENSG00000251856.1,MIR449C,miRNA,chr5:54503846-54503938	NA	0	0	0	0	0	0	0	0	0	0	0	0	0	0
ENSG00000259164.1,RP11-463C8.4.1,coding,chr14:76634406-76761558	NA	ENSG00000258747.1,RP11-163M18.1.1,lncRNA,chr14:44046359-44077466	ENSG00000257583.1,RP11-167N24.4.1,lncRNA,chr12:94306505-94323411	ENSG00000251856.1,MIR449C,miRNA,chr5:54503846-54503938	NA	0	0	0	0	0	0	0	0	0	0	0	0	0	0
ENSG00000259164.1,RP11-463C8.4.1,coding,chr14:76634406-76761558	NA	ENSG00000257470.1,RP11-397H6.1.1,lncRNA,chr12:95941929-95969038	ENSG00000234595.1,AC013733.3.1,lncRNA,chr2:182256084-182258679	ENSG00000207988.1,MIR576,miRNA,chr4:110629302-110629400	NA	0	0	0	0	0	0	0	0	0	0	0	0	0	0
ENSG00000259164.1,RP11-463C8.4.1,coding,chr14:76634406-76761558	NA	ENSG00000258747.1,RP11-163M18.1.1,lncRNA,chr14:44046359-44077466	ENSG00000234595.1,AC013733.3.1,lncRNA,chr2:182256084-182258679	ENSG00000207988.1,MIR576,miRNA,chr4:110629302-110629400	NA	0	0	0	0	0	0	0	0	0	0	0	0	0	0
ENSG00000244624.2,KRTAP20-1,coding,chr21:30910620-30910874	NA	ENSG00000234686.1,AC010971.1.1,lncRNA,chr7:49240278-49264958	ENSG00000231597.1,AC007557.4.1,lncRNA,chr2:217427356-217428100	ENSG00000207805.1,MIR483,miRNA,chr11:2111939-2112015	NA	0	0	0	0	0	0	0	0	0	0	0	0	0	0
ENSG00000244624.2,KRTAP20-1,coding,chr21:30910620-30910874	NA	ENSG00000236828.1,DMD-AS3,lncRNA,chrX:32682977-32684438	ENSG00000234686.1,AC010971.1.1,lncRNA,chr7:49240278-49264958	ENSG00000207805.1,MIR483,miRNA,chr11:2111939-2112015	NA	0	0	0	0	0	0	0	0	0	0	0	0	0	0
ENSG00000212725.3,KRTAP2-1,coding,chr17:36456318-36457094	NA	ENSG00000259989.1,CTD-2555A7.1.1,lncRNA,chr16:87577940-87589278	NA	ENSG00000212044.1,MIR548U,miRNA,chr1:147589954-147590046	ENSG00000207787.1,MIR98,miRNA,chrX:53599908-53600027	0	0	0	0	0	0	0	0	0	0	0	0	0	0
ENSG00000212725.3,KRTAP2-1,coding,chr17:36456318-36457094	NA	ENSG00000259989.1,CTD-2555A7.1.1,lncRNA,chr16:87577940-87589278	ENSG00000223817.1,CDH23-AS1,lncRNA,chr10:72937915-72941636	ENSG00000207787.1,MIR98,miRNA,chrX:53599908-53600027	NA	0	0	0	0	0	0	0	0	0	0	0	0	0	0
ENSG00000212725.3,KRTAP2-1,coding,chr17:36456318-36457094	NA	ENSG00000259989.1,CTD-2555A7.1.1,lncRNA,chr16:87577940-87589278	ENSG00000223817.1,CDH23-AS1,lncRNA,chr10:72937915-72941636	ENSG00000212044.1,MIR548U,miRNA,chr1:147589954-147590046	NA	0	0	0	0	0	0	0	0	0	0	0	0	0	0
ENSG00000244624.2,KRTAP20-1,coding,chr21:30910620-30910874	ENSG00000184345.4,IQCF2,coding,chr3:51870684-51872480	ENSG00000234686.1,AC010971.1.1,lncRNA,chr7:49240278-49264958	NA	ENSG00000207613.1,MIR181C,miRNA,chr19:13846512-13846622	NA	0	0	0	0	0	0	0	0	0	0	0	0	0	0
ENSG00000254834.2,OR5M10,coding,chr11:56100787-56101839	NA	ENSG00000234686.1,AC010971.1.1,lncRNA,chr7:49240278-49264958	ENSG00000231597.1,AC007557.4.1,lncRNA,chr2:217427356-217428100	ENSG00000207739.1,MIR218-2,miRNA,chr5:168127728-168127838	NA	0	0	0	0	0	0	0	1	0	0	0	0	0	1
ENSG00000254834.2,OR5M10,coding,chr11:56100787-56101839	NA	ENSG00000236828.1,DMD-AS3,lncRNA,chrX:32682977-32684438	ENSG00000234686.1,AC010971.1.1,lncRNA,chr7:49240278-49264958	ENSG00000207739.1,MIR218-2,miRNA,chr5:168127728-168127838	NA	0	0	0	0	0	0	0	1	0	0	0	0	0	1
ENSG00000244624.2,KRTAP20-1,coding,chr21:30910620-30910874	NA	ENSG00000234686.1,AC010971.1.1,lncRNA,chr7:49240278-49264958	ENSG00000231597.1,AC007557.4.1,lncRNA,chr2:217427356-217428100	ENSG00000207739.1,MIR218-2,miRNA,chr5:168127728-168127838	NA	0	0	0	0	0	0	0	0	0	0	0	0	0	0
ENSG00000244624.2,KRTAP20-1,coding,chr21:30910620-30910874	NA	ENSG00000236828.1,DMD-AS3,lncRNA,chrX:32682977-32684438	ENSG00000234686.1,AC010971.1.1,lncRNA,chr7:49240278-49264958	ENSG00000207739.1,MIR218-2,miRNA,chr5:168127728-168127838	NA	0	0	0	0	0	0	0	0	0	0	0	0	0	0
ENSG00000253148.1,RGS21,coding,chr1:190552744-190603038	NA	ENSG00000258690.1,RP11-81F13.1.1,lncRNA,chr14:36327599-36346119	ENSG00000253713.1,CTC-264O10.2.1,lncRNA,chr5:166475900-166479168	ENSG00000207739.1,MIR218-2,miRNA,chr5:168127728-168127838	NA	0	0	0	0	0	0	0	0	0	0	0	0	0	0
ENSG00000237247.2,MBD3L5,coding,chr19:6981588-6984053	NA	ENSG00000227090.1,AP000402.3.1,lncRNA,chr21:25180860-25196941	ENSG00000232624.1,RP11-478H13.3.1,lncRNA,chr10:29135881-29137154	ENSG00000208017.1,MIR140,miRNA,chr16:68524484-68524584	NA	0	0	0	0	0	0	0	0	0	0	0	0	0	0
ENSG00000240215.3,TRBV25OR9-2,coding,chr9:33652187-33652660	ENSG00000237247.2,MBD3L5,coding,chr19:6981588-6984053	ENSG00000227090.1,AP000402.3.1,lncRNA,chr21:25180860-25196941	NA	ENSG00000208017.1,MIR140,miRNA,chr16:68524484-68524584	NA	0	0	0	0	0	0	0	0	0	0	0	0	0	0
ENSG00000237247.2,MBD3L5,coding,chr19:6981588-6984053	NA	ENSG00000232624.1,RP11-478H13.3.1,lncRNA,chr10:29135881-29137154	ENSG00000232464.1,CTA-125H2.1.1,lncRNA,chr22:24685039-24709492	ENSG00000208017.1,MIR140,miRNA,chr16:68524484-68524584	NA	0	0	0	0	0	0	0	0	0	0	0	0	0	0
ENSG00000259164.1,RP11-463C8.4.1,coding,chr14:76634406-76761558	NA	ENSG00000233069.1,RP5-930J4.2.1,lncRNA,chr1:20931959-20933032	ENSG00000224311.1,RP11-40H20.4.1,lncRNA,chr1:27428183-27433430	ENSG00000221525.1,MIR1185-1,miRNA,chr14:100579066-100579152	NA	0	0	0	0	0	0	0	0	0	1	0	0	0	1
ENSG00000249008.1,RP11-487E13.1.1,coding,chr4:178400686-178406921	NA	ENSG00000224311.1,RP11-40H20.4.1,lncRNA,chr1:27428183-27433430	ENSG00000249545.1,CTC-558O19.1.1,lncRNA,chr5:94340610-94342353	ENSG00000221525.1,MIR1185-1,miRNA,chr14:100579066-100579152	NA	0	0	0	0	0	0	0	0	0	0	0	0	0	0
ENSG00000249008.1,RP11-487E13.1.1,coding,chr4:178400686-178406921	NA	ENSG00000224311.1,RP11-40H20.4.1,lncRNA,chr1:27428183-27433430	ENSG00000254178.1,RP11-299D14.2.1,lncRNA,chr8:25747561-25753568	ENSG00000221525.1,MIR1185-1,miRNA,chr14:100579066-100579152	NA	0	0	0	0	0	0	0	0	0	0	0	0	0	0
ENSG00000249008.1,RP11-487E13.1.1,coding,chr4:178400686-178406921	NA	ENSG00000257470.1,RP11-397H6.1.1,lncRNA,chr12:95941929-95969038	ENSG00000224311.1,RP11-40H20.4.1,lncRNA,chr1:27428183-27433430	ENSG00000221525.1,MIR1185-1,miRNA,chr14:100579066-100579152	NA	0	0	0	0	0	0	0	0	0	0	0	0	0	0
ENSG00000249008.1,RP11-487E13.1.1,coding,chr4:178400686-178406921	NA	ENSG00000258747.1,RP11-163M18.1.1,lncRNA,chr14:44046359-44077466	ENSG00000224311.1,RP11-40H20.4.1,lncRNA,chr1:27428183-27433430	ENSG00000221525.1,MIR1185-1,miRNA,chr14:100579066-100579152	NA	0	0	0	0	0	0	0	0	0	0	0	0	0	0
ENSG00000249008.1,RP11-487E13.1.1,coding,chr4:178400686-178406921	NA	ENSG00000224311.1,RP11-40H20.4.1,lncRNA,chr1:27428183-27433430	ENSG00000249808.1,CTD-2029E14.1.1,lncRNA,chr5:3231208-3234346	ENSG00000221525.1,MIR1185-1,miRNA,chr14:100579066-100579152	NA	0	0	0	0	0	0	0	0	0	0	1	0	0	1
ENSG00000249008.1,RP11-487E13.1.1,coding,chr4:178400686-178406921	NA	ENSG00000249747.1,RP11-308K2.1.1,lncRNA,chr4:188360133-188367494	ENSG00000224311.1,RP11-40H20.4.1,lncRNA,chr1:27428183-27433430	ENSG00000221525.1,MIR1185-1,miRNA,chr14:100579066-100579152	NA	0	0	0	0	0	0	0	0	0	1	0	0	0	1
ENSG00000259164.1,RP11-463C8.4.1,coding,chr14:76634406-76761558	ENSG00000249008.1,RP11-487E13.1.1,coding,chr4:178400686-178406921	ENSG00000224311.1,RP11-40H20.4.1,lncRNA,chr1:27428183-27433430	NA	ENSG00000221525.1,MIR1185-1,miRNA,chr14:100579066-100579152	NA	0	0	0	0	0	0	0	0	0	0	0	0	0	0
ENSG00000259164.1,RP11-463C8.4.1,coding,chr14:76634406-76761558	NA	ENSG00000257470.1,RP11-397H6.1.1,lncRNA,chr12:95941929-95969038	ENSG00000224311.1,RP11-40H20.4.1,lncRNA,chr1:27428183-27433430	ENSG00000221525.1,MIR1185-1,miRNA,chr14:100579066-100579152	NA	0	0	0	0	0	0	0	0	0	0	0	0	0	0
ENSG00000259164.1,RP11-463C8.4.1,coding,chr14:76634406-76761558	NA	ENSG00000258747.1,RP11-163M18.1.1,lncRNA,chr14:44046359-44077466	ENSG00000224311.1,RP11-40H20.4.1,lncRNA,chr1:27428183-27433430	ENSG00000221525.1,MIR1185-1,miRNA,chr14:100579066-100579152	NA	0	0	0	0	0	0	0	0	0	0	0	0	0	0
ENSG00000259164.1,RP11-463C8.4.1,coding,chr14:76634406-76761558	NA	ENSG00000232597.1,AC013727.1.1,lncRNA,chr2:103839859-103863099	ENSG00000248799.1,CTC-548H10.2.1,lncRNA,chr5:127015283-127027620	ENSG00000199072.1,MIRLET7F1,miRNA,chr9:95978449-95978536	NA	0	0	0	0	0	0	0	0	0	0	0	1	0	1
ENSG00000259164.1,RP11-463C8.4.1,coding,chr14:76634406-76761558	NA	ENSG00000229943.1,RP11-93N20.1.1,lncRNA,chr1:75201585-75203390	ENSG00000248799.1,CTC-548H10.2.1,lncRNA,chr5:127015283-127027620	ENSG00000199072.1,MIRLET7F1,miRNA,chr9:95978449-95978536	NA	0	0	0	0	0	0	0	0	0	0	0	1	0	1
ENSG00000259164.1,RP11-463C8.4.1,coding,chr14:76634406-76761558	NA	ENSG00000257470.1,RP11-397H6.1.1,lncRNA,chr12:95941929-95969038	ENSG00000248799.1,CTC-548H10.2.1,lncRNA,chr5:127015283-127027620	ENSG00000199072.1,MIRLET7F1,miRNA,chr9:95978449-95978536	NA	0	0	0	0	0	0	0	0	0	0	0	1	0	1
ENSG00000259164.1,RP11-463C8.4.1,coding,chr14:76634406-76761558	NA	ENSG00000258747.1,RP11-163M18.1.1,lncRNA,chr14:44046359-44077466	ENSG00000248799.1,CTC-548H10.2.1,lncRNA,chr5:127015283-127027620	ENSG00000199072.1,MIRLET7F1,miRNA,chr9:95978449-95978536	NA	0	0	0	0	0	0	0	0	0	0	0	1	0	1
ENSG00000259164.1,RP11-463C8.4.1,coding,chr14:76634406-76761558	NA	ENSG00000232597.1,AC013727.1.1,lncRNA,chr2:103839859-103863099	NA	ENSG00000199072.1,MIRLET7F1,miRNA,chr9:95978449-95978536	ENSG00000211578.1,MIR766,miRNA,chrX:118664728-118664839	0	0	0	0	0	0	0	0	0	0	0	1	0	1
ENSG00000259164.1,RP11-463C8.4.1,coding,chr14:76634406-76761558	NA	ENSG00000257470.1,RP11-397H6.1.1,lncRNA,chr12:95941929-95969038	NA	ENSG00000199072.1,MIRLET7F1,miRNA,chr9:95978449-95978536	ENSG00000211578.1,MIR766,miRNA,chrX:118664728-118664839	0	0	0	0	0	0	0	0	0	0	0	1	0	1
ENSG00000259164.1,RP11-463C8.4.1,coding,chr14:76634406-76761558	NA	ENSG00000257470.1,RP11-397H6.1.1,lncRNA,chr12:95941929-95969038	ENSG00000229928.1,LINC00400,lncRNA,chr13:42630766-42631602	ENSG00000199072.1,MIRLET7F1,miRNA,chr9:95978449-95978536	NA	0	0	0	0	0	0	0	0	0	0	0	1	0	1
ENSG00000259164.1,RP11-463C8.4.1,coding,chr14:76634406-76761558	NA	ENSG00000258747.1,RP11-163M18.1.1,lncRNA,chr14:44046359-44077466	ENSG00000229928.1,LINC00400,lncRNA,chr13:42630766-42631602	ENSG00000199072.1,MIRLET7F1,miRNA,chr9:95978449-95978536	NA	0	0	0	0	0	0	0	0	0	0	0	1	0	1
ENSG00000259164.1,RP11-463C8.4.1,coding,chr14:76634406-76761558	NA	ENSG00000230051.1,CTA-929C8.8.1,lncRNA,chr22:26057747-26105226	ENSG00000232597.1,AC013727.1.1,lncRNA,chr2:103839859-103863099	ENSG00000199072.1,MIRLET7F1,miRNA,chr9:95978449-95978536	NA	0	0	0	0	0	0	0	0	0	0	0	1	0	1
ENSG00000259164.1,RP11-463C8.4.1,coding,chr14:76634406-76761558	NA	ENSG00000257470.1,RP11-397H6.1.1,lncRNA,chr12:95941929-95969038	ENSG00000232597.1,AC013727.1.1,lncRNA,chr2:103839859-103863099	ENSG00000199072.1,MIRLET7F1,miRNA,chr9:95978449-95978536	NA	0	0	0	0	0	0	0	0	0	0	0	1	0	1
ENSG00000259164.1,RP11-463C8.4.1,coding,chr14:76634406-76761558	NA	ENSG00000258747.1,RP11-163M18.1.1,lncRNA,chr14:44046359-44077466	ENSG00000232597.1,AC013727.1.1,lncRNA,chr2:103839859-103863099	ENSG00000199072.1,MIRLET7F1,miRNA,chr9:95978449-95978536	NA	0	0	0	0	0	0	0	0	0	0	0	1	0	1
ENSG00000259164.1,RP11-463C8.4.1,coding,chr14:76634406-76761558	NA	ENSG00000257470.1,RP11-397H6.1.1,lncRNA,chr12:95941929-95969038	ENSG00000229943.1,RP11-93N20.1.1,lncRNA,chr1:75201585-75203390	ENSG00000199072.1,MIRLET7F1,miRNA,chr9:95978449-95978536	NA	0	0	0	0	0	0	0	0	0	0	0	1	0	1
ENSG00000259164.1,RP11-463C8.4.1,coding,chr14:76634406-76761558	NA	ENSG00000258747.1,RP11-163M18.1.1,lncRNA,chr14:44046359-44077466	ENSG00000229943.1,RP11-93N20.1.1,lncRNA,chr1:75201585-75203390	ENSG00000199072.1,MIRLET7F1,miRNA,chr9:95978449-95978536	NA	0	0	0	0	0	0	0	0	0	0	0	1	0	1
ENSG00000259164.1,RP11-463C8.4.1,coding,chr14:76634406-76761558	NA	ENSG00000258747.1,RP11-163M18.1.1,lncRNA,chr14:44046359-44077466	ENSG00000230051.1,CTA-929C8.8.1,lncRNA,chr22:26057747-26105226	ENSG00000199072.1,MIRLET7F1,miRNA,chr9:95978449-95978536	NA	0	0	0	0	0	0	0	0	0	0	0	1	0	1
ENSG00000259164.1,RP11-463C8.4.1,coding,chr14:76634406-76761558	NA	ENSG00000258747.1,RP11-163M18.1.1,lncRNA,chr14:44046359-44077466	ENSG00000257470.1,RP11-397H6.1.1,lncRNA,chr12:95941929-95969038	ENSG00000199072.1,MIRLET7F1,miRNA,chr9:95978449-95978536	NA	0	0	0	0	0	0	0	0	0	0	0	1	0	1
ENSG00000214285.1,NPS,coding,chr10:129237602-129240925	NA	ENSG00000250772.1,RP11-236P13.1.1,lncRNA,chr4:120939691-120945118	ENSG00000253643.1,RP11-561E1.1.1,lncRNA,chr8:24403714-24428232	ENSG00000207983.1,MIR613,miRNA,chr12:12808849-12808944	NA	0	0	0	0	0	0	0	0	0	0	0	0	0	0
ENSG00000244624.2,KRTAP20-1,coding,chr21:30910620-30910874	NA	ENSG00000234686.1,AC010971.1.1,lncRNA,chr7:49240278-49264958	ENSG00000231597.1,AC007557.4.1,lncRNA,chr2:217427356-217428100	ENSG00000221760.1,MIR548J,miRNA,chr22:25281177-25281289	NA	0	0	0	0	0	0	0	0	0	0	0	0	0	0
ENSG00000244624.2,KRTAP20-1,coding,chr21:30910620-30910874	NA	ENSG00000236828.1,DMD-AS3,lncRNA,chrX:32682977-32684438	ENSG00000234686.1,AC010971.1.1,lncRNA,chr7:49240278-49264958	ENSG00000221760.1,MIR548J,miRNA,chr22:25281177-25281289	NA	0	0	0	0	0	0	0	0	0	0	0	0	0	0
ENSG00000259164.1,RP11-463C8.4.1,coding,chr14:76634406-76761558	NA	ENSG00000228277.1,AC112518.3.1,lncRNA,chr4:74794882-74799108	ENSG00000231814.1,LINC00210,lncRNA,chr1:216132865-216160769	ENSG00000198972.1,MIRLET7E,miRNA,chr19:56887850-56887929	NA	0	0	0	0	0	0	0	0	0	0	0	0	0	0
ENSG00000259164.1,RP11-463C8.4.1,coding,chr14:76634406-76761558	NA	ENSG00000257470.1,RP11-397H6.1.1,lncRNA,chr12:95941929-95969038	ENSG00000231814.1,LINC00210,lncRNA,chr1:216132865-216160769	ENSG00000198972.1,MIRLET7E,miRNA,chr19:56887850-56887929	NA	0	0	0	0	0	0	0	0	0	0	0	0	0	0
ENSG00000259164.1,RP11-463C8.4.1,coding,chr14:76634406-76761558	NA	ENSG00000258747.1,RP11-163M18.1.1,lncRNA,chr14:44046359-44077466	ENSG00000231814.1,LINC00210,lncRNA,chr1:216132865-216160769	ENSG00000198972.1,MIRLET7E,miRNA,chr19:56887850-56887929	NA	0	0	0	0	0	0	0	0	0	0	0	0	0	0
ENSG00000259164.1,RP11-463C8.4.1,coding,chr14:76634406-76761558	NA	ENSG00000257470.1,RP11-397H6.1.1,lncRNA,chr12:95941929-95969038	ENSG00000261176.1,RP11-2L4.1.1,lncRNA,chr16:81145154-81166316	ENSG00000198972.1,MIRLET7E,miRNA,chr19:56887850-56887929	NA	0	0	0	0	0	0	0	0	0	0	0	0	0	0
ENSG00000259164.1,RP11-463C8.4.1,coding,chr14:76634406-76761558	NA	ENSG00000257470.1,RP11-397H6.1.1,lncRNA,chr12:95941929-95969038	ENSG00000228277.1,AC112518.3.1,lncRNA,chr4:74794882-74799108	ENSG00000198972.1,MIRLET7E,miRNA,chr19:56887850-56887929	NA	0	0	0	0	0	0	0	0	0	0	0	0	0	0
ENSG00000259164.1,RP11-463C8.4.1,coding,chr14:76634406-76761558	NA	ENSG00000258747.1,RP11-163M18.1.1,lncRNA,chr14:44046359-44077466	ENSG00000228277.1,AC112518.3.1,lncRNA,chr4:74794882-74799108	ENSG00000198972.1,MIRLET7E,miRNA,chr19:56887850-56887929	NA	0	0	0	0	0	0	0	0	0	0	0	0	0	0
ENSG00000259164.1,RP11-463C8.4.1,coding,chr14:76634406-76761558	NA	ENSG00000258747.1,RP11-163M18.1.1,lncRNA,chr14:44046359-44077466	ENSG00000257470.1,RP11-397H6.1.1,lncRNA,chr12:95941929-95969038	ENSG00000198972.1,MIRLET7E,miRNA,chr19:56887850-56887929	NA	0	0	0	0	0	0	0	0	0	0	0	0	0	0
ENSG00000254834.2,OR5M10,coding,chr11:56100787-56101839	NA	ENSG00000234686.1,AC010971.1.1,lncRNA,chr7:49240278-49264958	ENSG00000231597.1,AC007557.4.1,lncRNA,chr2:217427356-217428100	ENSG00000207718.1,MIR15A,miRNA,chr13:49521255-49521338	NA	0	0	0	0	0	0	0	1	0	0	0	0	0	1
ENSG00000254834.2,OR5M10,coding,chr11:56100787-56101839	NA	ENSG00000236828.1,DMD-AS3,lncRNA,chrX:32682977-32684438	ENSG00000234686.1,AC010971.1.1,lncRNA,chr7:49240278-49264958	ENSG00000207718.1,MIR15A,miRNA,chr13:49521255-49521338	NA	0	0	0	0	0	0	0	1	0	0	0	0	0	1
ENSG00000244624.2,KRTAP20-1,coding,chr21:30910620-30910874	NA	ENSG00000234686.1,AC010971.1.1,lncRNA,chr7:49240278-49264958	ENSG00000231597.1,AC007557.4.1,lncRNA,chr2:217427356-217428100	ENSG00000207718.1,MIR15A,miRNA,chr13:49521255-49521338	NA	0	0	0	0	0	0	0	0	0	0	0	0	0	0
ENSG00000244624.2,KRTAP20-1,coding,chr21:30910620-30910874	NA	ENSG00000236828.1,DMD-AS3,lncRNA,chrX:32682977-32684438	ENSG00000234686.1,AC010971.1.1,lncRNA,chr7:49240278-49264958	ENSG00000207718.1,MIR15A,miRNA,chr13:49521255-49521338	NA	0	0	0	0	0	0	0	0	0	0	0	0	0	0
ENSG00000174937.2,OR5M3,coding,chr11:55993539-55994590	NA	ENSG00000236828.1,DMD-AS3,lncRNA,chrX:32682977-32684438	ENSG00000234686.1,AC010971.1.1,lncRNA,chr7:49240278-49264958	ENSG00000207821.1,MIR640,miRNA,chr19:19406871-19406967	NA	0	0	0	0	0	0	0	0	0	0	0	0	0	0
ENSG00000174937.2,OR5M3,coding,chr11:55993539-55994590	NA	ENSG00000233519.1,RP11-177F11.1.1,lncRNA,chr1:238630593-238631046	ENSG00000234686.1,AC010971.1.1,lncRNA,chr7:49240278-49264958	ENSG00000207821.1,MIR640,miRNA,chr19:19406871-19406967	NA	0	0	0	0	0	0	0	0	0	0	0	0	0	0
ENSG00000174937.2,OR5M3,coding,chr11:55993539-55994590	NA	ENSG00000236828.1,DMD-AS3,lncRNA,chrX:32682977-32684438	ENSG00000233519.1,RP11-177F11.1.1,lncRNA,chr1:238630593-238631046	ENSG00000207821.1,MIR640,miRNA,chr19:19406871-19406967	NA	0	0	0	0	0	0	0	0	0	0	0	0	0	0
ENSG00000255012.1,OR5M1,coding,chr11:56136606-56137554	NA	ENSG00000253634.1,RP11-587H10.2.1,lncRNA,chr8:93646846-93736898	ENSG00000230690.1,AC013402.5.1,lncRNA,chr2:104642226-104647727	ENSG00000207613.1,MIR181C,miRNA,chr19:13846512-13846622	NA	0	0	0	0	0	0	0	0	0	0	0	0	0	0
ENSG00000255012.1,OR5M1,coding,chr11:56136606-56137554	NA	ENSG00000253634.1,RP11-587H10.2.1,lncRNA,chr8:93646846-93736898	ENSG00000237119.1,RP11-305P22.5.1,lncRNA,chr20:61139807-61155660	ENSG00000207613.1,MIR181C,miRNA,chr19:13846512-13846622	NA	0	0	0	0	0	0	0	0	0	0	0	0	0	0
ENSG00000255012.1,OR5M1,coding,chr11:56136606-56137554	NA	ENSG00000253634.1,RP11-587H10.2.1,lncRNA,chr8:93646846-93736898	ENSG00000234938.2,AC012668.1.1,lncRNA,chr2:216103414-216118494	ENSG00000207613.1,MIR181C,miRNA,chr19:13846512-13846622	NA	0	0	0	0	0	0	0	0	0	0	0	0	0	0
ENSG00000255012.1,OR5M1,coding,chr11:56136606-56137554	NA	ENSG00000253634.1,RP11-587H10.2.1,lncRNA,chr8:93646846-93736898	ENSG00000250193.1,RP11-419L4.1.1,lncRNA,chr4:130439779-130445627	ENSG00000207613.1,MIR181C,miRNA,chr19:13846512-13846622	NA	0	0	0	0	0	0	0	0	0	0	0	0	0	0
ENSG00000215547.1,DEFB115,coding,chr20:29309127-29311096	NA	ENSG00000231791.1,RP11-382D12.1.1,lncRNA,chr1:182564827-182568583	ENSG00000235503.2,AC079799.2.1,lncRNA,chr7:82822405-82829518	ENSG00000207583.1,MIR606,miRNA,chr10:76982221-76982317	NA	0	0	0	0	0	0	0	0	0	0	0	0	0	0
ENSG00000197428.2,OR51D1,coding,chr11:4617520-4618644	NA	ENSG00000231791.1,RP11-382D12.1.1,lncRNA,chr1:182564827-182568583	ENSG00000235503.2,AC079799.2.1,lncRNA,chr7:82822405-82829518	ENSG00000207583.1,MIR606,miRNA,chr10:76982221-76982317	NA	0	0	0	0	0	0	0	0	0	0	0	0	0	0
ENSG00000215547.1,DEFB115,coding,chr20:29309127-29311096	ENSG00000197428.2,OR51D1,coding,chr11:4617520-4618644	ENSG00000235503.2,AC079799.2.1,lncRNA,chr7:82822405-82829518	NA	ENSG00000207583.1,MIR606,miRNA,chr10:76982221-76982317	NA	0	0	0	0	0	0	0	0	0	0	0	0	0	0
ENSG00000244624.2,KRTAP20-1,coding,chr21:30910620-30910874	NA	ENSG00000225341.1,AC013269.4.1,lncRNA,chr2:131004317-131011225	ENSG00000227043.1,RP11-286M16.1.1,lncRNA,chr1:228077919-228088122	ENSG00000199036.1,MIR219-1,miRNA,chr6:33283589-33283699	NA	0	0	0	0	0	0	0	0	0	0	0	0	0	0
ENSG00000261717.1,RP11-77K12.1.1,coding,chr16:74004082-74056105	NA	ENSG00000257470.1,RP11-397H6.1.1,lncRNA,chr12:95941929-95969038	ENSG00000232597.1,AC013727.1.1,lncRNA,chr2:103839859-103863099	ENSG00000211578.1,MIR766,miRNA,chrX:118664728-118664839	NA	0	0	0	0	0	0	0	0	0	0	0	0	0	0
ENSG00000261717.1,RP11-77K12.1.1,coding,chr16:74004082-74056105	ENSG00000204823.3,AC008676.1,coding,chr5:156735326-156744525	ENSG00000232597.1,AC013727.1.1,lncRNA,chr2:103839859-103863099	NA	ENSG00000211578.1,MIR766,miRNA,chrX:118664728-118664839	NA	0	0	0	0	0	0	0	0	0	0	0	0	0	0
ENSG00000259164.1,RP11-463C8.4.1,coding,chr14:76634406-76761558	ENSG00000261717.1,RP11-77K12.1.1,coding,chr16:74004082-74056105	ENSG00000232597.1,AC013727.1.1,lncRNA,chr2:103839859-103863099	NA	ENSG00000211578.1,MIR766,miRNA,chrX:118664728-118664839	NA	0	0	0	0	0	0	0	0	0	0	0	0	0	0
ENSG00000259164.1,RP11-463C8.4.1,coding,chr14:76634406-76761558	ENSG00000261717.1,RP11-77K12.1.1,coding,chr16:74004082-74056105	ENSG00000257470.1,RP11-397H6.1.1,lncRNA,chr12:95941929-95969038	NA	ENSG00000211578.1,MIR766,miRNA,chrX:118664728-118664839	NA	0	0	0	0	0	0	0	0	0	0	0	0	0	0
ENSG00000183054.6,RGPD6,coding,chr2:110705925-111051231	NA	ENSG00000232624.1,RP11-478H13.3.1,lncRNA,chr10:29135881-29137154	ENSG00000224122.1,POU6F2-AS1,lncRNA,chr7:39410721-39412470	ENSG00000252466.1,MIR2115,miRNA,chr3:48332853-48332953	NA	0	0	0	0	0	0	0	0	0	0	0	0	0	0
ENSG00000105398.3,SULT2A1,coding,chr19:53065534-53081466	NA	ENSG00000232624.1,RP11-478H13.3.1,lncRNA,chr10:29135881-29137154	ENSG00000232464.1,CTA-125H2.1.1,lncRNA,chr22:24685039-24709492	ENSG00000252466.1,MIR2115,miRNA,chr3:48332853-48332953	NA	0	0	0	0	0	0	0	0	0	0	0	0	0	0
ENSG00000244624.2,KRTAP20-1,coding,chr21:30910620-30910874	NA	ENSG00000236828.1,DMD-AS3,lncRNA,chrX:32682977-32684438	ENSG00000234686.1,AC010971.1.1,lncRNA,chr7:49240278-49264958	ENSG00000252466.1,MIR2115,miRNA,chr3:48332853-48332953	NA	0	0	0	0	0	0	0	0	0	0	0	0	0	0
ENSG00000259164.1,RP11-463C8.4.1,coding,chr14:76634406-76761558	NA	ENSG00000232597.1,AC013727.1.1,lncRNA,chr2:103839859-103863099	ENSG00000249405.1,RP11-317O24.1.1,lncRNA,chr5:50190350-50191611	ENSG00000211578.1,MIR766,miRNA,chrX:118664728-118664839	NA	0	0	0	0	0	0	0	0	0	0	1	0	0	1
ENSG00000259164.1,RP11-463C8.4.1,coding,chr14:76634406-76761558	NA	ENSG00000257470.1,RP11-397H6.1.1,lncRNA,chr12:95941929-95969038	ENSG00000249405.1,RP11-317O24.1.1,lncRNA,chr5:50190350-50191611	ENSG00000211578.1,MIR766,miRNA,chrX:118664728-118664839	NA	0	0	0	0	0	0	0	0	0	0	1	0	0	1
ENSG00000259164.1,RP11-463C8.4.1,coding,chr14:76634406-76761558	NA	ENSG00000232170.1,GS1-756B1.2.1,lncRNA,chr10:8341299-8350274	ENSG00000227981.2,AC012668.3.1,lncRNA,chr2:216152374-216155603	ENSG00000221067.1,MIR1280,miRNA,chr3:129563697-129563791	NA	0	0	0	0	0	0	0	0	0	0	0	0	0	0
ENSG00000259164.1,RP11-463C8.4.1,coding,chr14:76634406-76761558	NA	ENSG00000257470.1,RP11-397H6.1.1,lncRNA,chr12:95941929-95969038	ENSG00000227981.2,AC012668.3.1,lncRNA,chr2:216152374-216155603	ENSG00000221067.1,MIR1280,miRNA,chr3:129563697-129563791	NA	0	0	0	0	0	0	0	0	0	0	0	0	0	0
ENSG00000259164.1,RP11-463C8.4.1,coding,chr14:76634406-76761558	NA	ENSG00000258747.1,RP11-163M18.1.1,lncRNA,chr14:44046359-44077466	ENSG00000227981.2,AC012668.3.1,lncRNA,chr2:216152374-216155603	ENSG00000221067.1,MIR1280,miRNA,chr3:129563697-129563791	NA	0	0	0	0	0	0	0	0	0	0	0	0	0	0
ENSG00000244255.1,XXbac-BPG116M5.17.1,coding,chr6:32003453-32027804	NA	ENSG00000253699.1,CTD-3118D11.3.1,lncRNA,chr8:87261762-87293581	ENSG00000228272.1,AC106874.1.1,lncRNA,chr2:84395742-84431409	ENSG00000207797.1,MIR187,miRNA,chr18:31738778-31738887	NA	0	0	0	0	0	0	0	1	0	0	0	0	0	1
ENSG00000166930.2,MS4A5,coding,chr11:59953637-59979263	NA	ENSG00000223410.1,RP1-191L6.2.1,lncRNA,chr20:38183095-38188412	ENSG00000254000.1,RP11-245A18.1.1,lncRNA,chr8:125006179-125007354	ENSG00000207612.1,MIR604,miRNA,chr10:29873938-29874032	NA	0	0	0	0	0	0	0	0	0	0	0	0	0	0
ENSG00000122852.9,SFTPA1,coding,chr10:81040700-81045203	NA	ENSG00000225619.1,AC009232.2.1,lncRNA,chr2:2302010-2309889	ENSG00000229283.1,RP5-1125M8.2.1,lncRNA,chr1:111661744-111668126	ENSG00000207612.1,MIR604,miRNA,chr10:29873938-29874032	NA	0	0	0	0	0	0	0	0	0	0	0	0	0	0
ENSG00000259164.1,RP11-463C8.4.1,coding,chr14:76634406-76761558	ENSG00000204703.3,OR2B3,coding,chr6:29161963-29163069	ENSG00000258747.1,RP11-163M18.1.1,lncRNA,chr14:44046359-44077466	NA	ENSG00000207612.1,MIR604,miRNA,chr10:29873938-29874032	NA	0	0	0	0	0	0	0	0	0	0	0	0	0	0
ENSG00000259164.1,RP11-463C8.4.1,coding,chr14:76634406-76761558	ENSG00000258691.1,RP11-404P21.8.1,coding,chr14:95740933-95800019	ENSG00000254000.1,RP11-245A18.1.1,lncRNA,chr8:125006179-125007354	NA	ENSG00000207612.1,MIR604,miRNA,chr10:29873938-29874032	NA	0	0	0	0	0	0	0	0	0	0	0	0	0	0
ENSG00000259164.1,RP11-463C8.4.1,coding,chr14:76634406-76761558	NA	ENSG00000258747.1,RP11-163M18.1.1,lncRNA,chr14:44046359-44077466	ENSG00000254000.1,RP11-245A18.1.1,lncRNA,chr8:125006179-125007354	ENSG00000207612.1,MIR604,miRNA,chr10:29873938-29874032	NA	0	0	0	0	0	0	0	0	0	0	0	0	0	0
ENSG00000259164.1,RP11-463C8.4.1,coding,chr14:76634406-76761558	NA	ENSG00000258747.1,RP11-163M18.1.1,lncRNA,chr14:44046359-44077466	ENSG00000257470.1,RP11-397H6.1.1,lncRNA,chr12:95941929-95969038	ENSG00000207719.1,MIR623,miRNA,chr13:98806385-98806483	NA	0	0	0	0	0	0	0	0	0	0	0	0	0	0
ENSG00000186393.5,KRT26,coding,chr17:36176015-36181940	NA	ENSG00000232170.1,GS1-756B1.2.1,lncRNA,chr10:8341299-8350274	ENSG00000228488.1,AC092168.4.1,lncRNA,chr2:100705114-100705776	ENSG00000221067.1,MIR1280,miRNA,chr3:129563697-129563791	NA	0	0	0	0	0	0	0	0	0	0	0	0	0	0
ENSG00000186393.5,KRT26,coding,chr17:36176015-36181940	ENSG00000259752.1,RP11-90J19.1.1,coding,chr15:45212984-45213612	ENSG00000232170.1,GS1-756B1.2.1,lncRNA,chr10:8341299-8350274	NA	ENSG00000221067.1,MIR1280,miRNA,chr3:129563697-129563791	NA	0	0	0	0	0	0	0	0	0	0	0	0	0	0
ENSG00000149133.1,OR5F1,coding,chr11:55517732-55518677	NA	ENSG00000251256.1,RP11-273B19.1.1,lncRNA,chr4:55406490-55420164	ENSG00000230051.1,CTA-929C8.8.1,lncRNA,chr22:26057747-26105226	ENSG00000207728.1,MIR449B,miRNA,chr5:54502230-54502327	NA	0	0	0	0	0	0	0	0	0	0	0	0	0	0
ENSG00000258728.1,RP11-195F19.29.1,coding,chr9:34636641-34647110	NA	ENSG00000230761.1,RP11-342C24.8.1,lncRNA,chr10:46218375-46229027	ENSG00000257995.1,RP11-632B21.1.1,lncRNA,chr12:89535666-89540730	ENSG00000207574.1,MIR661,miRNA,chr8:145091346-145091435	NA	0	0	0	0	0	0	0	0	0	0	0	0	0	0
ENSG00000184345.4,IQCF2,coding,chr3:51870684-51872480	NA	ENSG00000237414.1,RP11-321L2.2.1,lncRNA,chr9:23884987-23888054	ENSG00000234686.1,AC010971.1.1,lncRNA,chr7:49240278-49264958	ENSG00000207613.1,MIR181C,miRNA,chr19:13846512-13846622	NA	0	0	0	0	0	0	0	0	0	0	0	0	0	0
ENSG00000244624.2,KRTAP20-1,coding,chr21:30910620-30910874	ENSG00000184345.4,IQCF2,coding,chr3:51870684-51872480	ENSG00000237414.1,RP11-321L2.2.1,lncRNA,chr9:23884987-23888054	NA	ENSG00000207613.1,MIR181C,miRNA,chr19:13846512-13846622	NA	0	0	0	0	0	0	0	0	0	0	0	0	0	0
ENSG00000244624.2,KRTAP20-1,coding,chr21:30910620-30910874	NA	ENSG00000261376.1,RP11-525K10.2.1,lncRNA,chr16:78770526-78772080	ENSG00000237414.1,RP11-321L2.2.1,lncRNA,chr9:23884987-23888054	ENSG00000221537.1,MIR548H1,miRNA,chr14:63631494-63631596	NA	0	0	0	0	0	0	0	0	0	0	0	0	0	0
ENSG00000244624.2,KRTAP20-1,coding,chr21:30910620-30910874	NA	ENSG00000237414.1,RP11-321L2.2.1,lncRNA,chr9:23884987-23888054	ENSG00000249545.1,CTC-558O19.1.1,lncRNA,chr5:94340610-94342353	ENSG00000221537.1,MIR548H1,miRNA,chr14:63631494-63631596	NA	0	0	0	0	0	0	0	0	0	0	0	0	0	0
ENSG00000244624.2,KRTAP20-1,coding,chr21:30910620-30910874	NA	ENSG00000237414.1,RP11-321L2.2.1,lncRNA,chr9:23884987-23888054	ENSG00000254178.1,RP11-299D14.2.1,lncRNA,chr8:25747561-25753568	ENSG00000221537.1,MIR548H1,miRNA,chr14:63631494-63631596	NA	0	0	0	0	0	0	0	0	0	0	0	0	0	0
ENSG00000259164.1,RP11-463C8.4.1,coding,chr14:76634406-76761558	NA	ENSG00000257470.1,RP11-397H6.1.1,lncRNA,chr12:95941929-95969038	ENSG00000237414.1,RP11-321L2.2.1,lncRNA,chr9:23884987-23888054	ENSG00000221537.1,MIR548H1,miRNA,chr14:63631494-63631596	NA	0	0	0	0	0	0	0	0	0	0	0	0	0	0
ENSG00000244624.2,KRTAP20-1,coding,chr21:30910620-30910874	NA	ENSG00000237414.1,RP11-321L2.2.1,lncRNA,chr9:23884987-23888054	ENSG00000249808.1,CTD-2029E14.1.1,lncRNA,chr5:3231208-3234346	ENSG00000221537.1,MIR548H1,miRNA,chr14:63631494-63631596	NA	0	0	0	0	0	0	0	0	0	0	1	0	0	1
ENSG00000244624.2,KRTAP20-1,coding,chr21:30910620-30910874	NA	ENSG00000249747.1,RP11-308K2.1.1,lncRNA,chr4:188360133-188367494	ENSG00000237414.1,RP11-321L2.2.1,lncRNA,chr9:23884987-23888054	ENSG00000221537.1,MIR548H1,miRNA,chr14:63631494-63631596	NA	0	0	0	0	0	0	0	0	0	1	0	0	0	1
ENSG00000259164.1,RP11-463C8.4.1,coding,chr14:76634406-76761558	ENSG00000244624.2,KRTAP20-1,coding,chr21:30910620-30910874	ENSG00000237414.1,RP11-321L2.2.1,lncRNA,chr9:23884987-23888054	NA	ENSG00000221537.1,MIR548H1,miRNA,chr14:63631494-63631596	NA	0	0	0	0	0	0	0	0	0	0	0	0	0	0
ENSG00000259164.1,RP11-463C8.4.1,coding,chr14:76634406-76761558	NA	ENSG00000258747.1,RP11-163M18.1.1,lncRNA,chr14:44046359-44077466	ENSG00000237414.1,RP11-321L2.2.1,lncRNA,chr9:23884987-23888054	ENSG00000221537.1,MIR548H1,miRNA,chr14:63631494-63631596	NA	0	0	0	0	0	0	0	0	0	0	0	0	0	0
ENSG00000257767.1,RP11-162P23.2.1,coding,chr12:110677852-110713605	NA	ENSG00000237414.1,RP11-321L2.2.1,lncRNA,chr9:23884987-23888054	NA	ENSG00000208033.1,MIR609,miRNA,chr10:105968536-105968631	ENSG00000199082.1,MIR342,miRNA,chr14:99645744-99645843	0	0	0	0	0	0	0	0	0	0	0	0	0	0
ENSG00000244624.2,KRTAP20-1,coding,chr21:30910620-30910874	NA	ENSG00000237414.1,RP11-321L2.2.1,lncRNA,chr9:23884987-23888054	ENSG00000234686.1,AC010971.1.1,lncRNA,chr7:49240278-49264958	ENSG00000208033.1,MIR609,miRNA,chr10:105968536-105968631	NA	0	0	0	0	0	0	0	0	0	0	0	0	0	0
ENSG00000244624.2,KRTAP20-1,coding,chr21:30910620-30910874	NA	ENSG00000237414.1,RP11-321L2.2.1,lncRNA,chr9:23884987-23888054	NA	ENSG00000208033.1,MIR609,miRNA,chr10:105968536-105968631	ENSG00000207613.1,MIR181C,miRNA,chr19:13846512-13846622	0	0	0	0	0	0	0	0	0	0	0	0	0	0
ENSG00000244624.2,KRTAP20-1,coding,chr21:30910620-30910874	NA	ENSG00000236828.1,DMD-AS3,lncRNA,chrX:32682977-32684438	ENSG00000237414.1,RP11-321L2.2.1,lncRNA,chr9:23884987-23888054	ENSG00000208033.1,MIR609,miRNA,chr10:105968536-105968631	NA	0	0	0	0	0	0	0	0	0	0	0	0	0	0
ENSG00000244624.2,KRTAP20-1,coding,chr21:30910620-30910874	NA	ENSG00000237414.1,RP11-321L2.2.1,lncRNA,chr9:23884987-23888054	ENSG00000260851.1,RP11-403P17.5.1,lncRNA,chr16:65061247-65108606	ENSG00000208033.1,MIR609,miRNA,chr10:105968536-105968631	NA	0	0	0	0	0	0	0	0	0	0	0	0	0	0
ENSG00000244624.2,KRTAP20-1,coding,chr21:30910620-30910874	NA	ENSG00000237414.1,RP11-321L2.2.1,lncRNA,chr9:23884987-23888054	ENSG00000249808.1,CTD-2029E14.1.1,lncRNA,chr5:3231208-3234346	ENSG00000208033.1,MIR609,miRNA,chr10:105968536-105968631	NA	0	0	0	0	0	0	0	0	0	0	1	0	0	1
ENSG00000244624.2,KRTAP20-1,coding,chr21:30910620-30910874	NA	ENSG00000249747.1,RP11-308K2.1.1,lncRNA,chr4:188360133-188367494	ENSG00000237414.1,RP11-321L2.2.1,lncRNA,chr9:23884987-23888054	ENSG00000208033.1,MIR609,miRNA,chr10:105968536-105968631	NA	0	0	0	0	0	0	0	0	0	1	0	0	0	1
ENSG00000184724.4,KRTAP6-1,coding,chr21:30907620-30911767	ENSG00000212938.3,KRTAP6-3,coding,chr21:30886629-30887265	ENSG00000237414.1,RP11-321L2.2.1,lncRNA,chr9:23884987-23888054	NA	ENSG00000221464.1,MIR1271,miRNA,chr5:175727554-175727640	NA	0	0	0	0	0	0	0	1	0	0	0	0	0	1
ENSG00000150261.2,OR8K1,coding,chr11:55869996-55871083	NA	ENSG00000237414.1,RP11-321L2.2.1,lncRNA,chr9:23884987-23888054	ENSG00000234686.1,AC010971.1.1,lncRNA,chr7:49240278-49264958	ENSG00000221464.1,MIR1271,miRNA,chr5:175727554-175727640	NA	0	0	0	0	0	0	0	0	0	0	0	0	0	0
ENSG00000150261.2,OR8K1,coding,chr11:55869996-55871083	ENSG00000212938.3,KRTAP6-3,coding,chr21:30886629-30887265	ENSG00000237414.1,RP11-321L2.2.1,lncRNA,chr9:23884987-23888054	NA	ENSG00000221464.1,MIR1271,miRNA,chr5:175727554-175727640	NA	0	0	0	0	0	0	0	0	0	0	0	0	0	0
ENSG00000150261.2,OR8K1,coding,chr11:55869996-55871083	NA	ENSG00000236828.1,DMD-AS3,lncRNA,chrX:32682977-32684438	ENSG00000237414.1,RP11-321L2.2.1,lncRNA,chr9:23884987-23888054	ENSG00000221464.1,MIR1271,miRNA,chr5:175727554-175727640	NA	0	0	0	0	0	0	0	0	0	0	0	0	0	0
ENSG00000150261.2,OR8K1,coding,chr11:55869996-55871083	NA	ENSG00000233519.1,RP11-177F11.1.1,lncRNA,chr1:238630593-238631046	ENSG00000237414.1,RP11-321L2.2.1,lncRNA,chr9:23884987-23888054	ENSG00000221464.1,MIR1271,miRNA,chr5:175727554-175727640	NA	0	0	0	0	0	0	0	0	0	0	0	0	0	0
ENSG00000259164.1,RP11-463C8.4.1,coding,chr14:76634406-76761558	NA	ENSG00000257470.1,RP11-397H6.1.1,lncRNA,chr12:95941929-95969038	ENSG00000237414.1,RP11-321L2.2.1,lncRNA,chr9:23884987-23888054	ENSG00000211578.1,MIR766,miRNA,chrX:118664728-118664839	NA	0	0	0	0	0	0	0	0	0	0	0	0	0	0
ENSG00000259164.1,RP11-463C8.4.1,coding,chr14:76634406-76761558	NA	ENSG00000237414.1,RP11-321L2.2.1,lncRNA,chr9:23884987-23888054	ENSG00000257523.1,CTD-2384A14.2.1,lncRNA,chr14:28514792-28517881	ENSG00000212044.1,MIR548U,miRNA,chr1:147589954-147590046	NA	0	0	0	0	0	0	0	0	0	0	1	0	0	1
ENSG00000259164.1,RP11-463C8.4.1,coding,chr14:76634406-76761558	ENSG00000258691.1,RP11-404P21.8.1,coding,chr14:95740933-95800019	ENSG00000237414.1,RP11-321L2.2.1,lncRNA,chr9:23884987-23888054	NA	ENSG00000212044.1,MIR548U,miRNA,chr1:147589954-147590046	NA	0	0	0	0	0	0	0	0	0	0	0	0	0	0
ENSG00000244624.2,KRTAP20-1,coding,chr21:30910620-30910874	NA	ENSG00000237414.1,RP11-321L2.2.1,lncRNA,chr9:23884987-23888054	ENSG00000234686.1,AC010971.1.1,lncRNA,chr7:49240278-49264958	ENSG00000207613.1,MIR181C,miRNA,chr19:13846512-13846622	NA	0	0	0	0	0	0	0	0	0	0	0	0	0	0
ENSG00000259164.1,RP11-463C8.4.1,coding,chr14:76634406-76761558	NA	ENSG00000258747.1,RP11-163M18.1.1,lncRNA,chr14:44046359-44077466	ENSG00000237414.1,RP11-321L2.2.1,lncRNA,chr9:23884987-23888054	ENSG00000212044.1,MIR548U,miRNA,chr1:147589954-147590046	NA	0	0	0	0	0	0	0	0	0	0	0	0	0	0
ENSG00000244624.2,KRTAP20-1,coding,chr21:30910620-30910874	NA	ENSG00000237414.1,RP11-321L2.2.1,lncRNA,chr9:23884987-23888054	ENSG00000259837.1,RP11-672L10.1.1,lncRNA,chr18:916083-917994	ENSG00000207613.1,MIR181C,miRNA,chr19:13846512-13846622	NA	0	0	0	0	0	0	0	0	0	0	0	0	0	0
ENSG00000259164.1,RP11-463C8.4.1,coding,chr14:76634406-76761558	ENSG00000244624.2,KRTAP20-1,coding,chr21:30910620-30910874	ENSG00000237414.1,RP11-321L2.2.1,lncRNA,chr9:23884987-23888054	NA	ENSG00000207613.1,MIR181C,miRNA,chr19:13846512-13846622	NA	0	0	0	0	0	0	0	0	0	0	0	0	0	0
ENSG00000259164.1,RP11-463C8.4.1,coding,chr14:76634406-76761558	NA	ENSG00000258747.1,RP11-163M18.1.1,lncRNA,chr14:44046359-44077466	ENSG00000237414.1,RP11-321L2.2.1,lncRNA,chr9:23884987-23888054	ENSG00000207613.1,MIR181C,miRNA,chr19:13846512-13846622	NA	0	0	0	0	0	0	0	0	0	0	0	0	0	0
ENSG00000182783.3,OR2T29,coding,chr1:246788406-246789420	NA	ENSG00000231238.1,LINC00349,lncRNA,chr13:18012636-18022837	ENSG00000234953.2,RP5-837I24.2.1,lncRNA,chr1:81752152-81795975	ENSG00000221410.1,MIR1238,miRNA,chr19:10523797-10523880	NA	0	0	0	0	0	0	0	0	0	0	1	0	0	1
ENSG00000182783.3,OR2T29,coding,chr1:246788406-246789420	NA	ENSG00000234116.1,RP11-261C10.1.1,lncRNA,chr1:241235769-241237393	ENSG00000231238.1,LINC00349,lncRNA,chr13:18012636-18022837	ENSG00000221410.1,MIR1238,miRNA,chr19:10523797-10523880	NA	0	0	0	0	0	0	0	0	0	0	0	0	0	0
ENSG00000182783.3,OR2T29,coding,chr1:246788406-246789420	NA	ENSG00000233519.1,RP11-177F11.1.1,lncRNA,chr1:238630593-238631046	ENSG00000231238.1,LINC00349,lncRNA,chr13:18012636-18022837	ENSG00000221410.1,MIR1238,miRNA,chr19:10523797-10523880	NA	0	0	0	0	0	0	0	0	0	0	0	0	0	0
ENSG00000184724.4,KRTAP6-1,coding,chr21:30907620-30911767	ENSG00000179709.3,NLRP8,coding,chr19:61151009-61191807	ENSG00000250888.1,RP11-168A11.1.1,lncRNA,chr5:79268157-79299205	NA	ENSG00000221464.1,MIR1271,miRNA,chr5:175727554-175727640	NA	0	0	0	0	0	0	0	1	0	0	0	0	0	1
ENSG00000184724.4,KRTAP6-1,coding,chr21:30907620-30911767	NA	ENSG00000253403.1,RP11-348M17.2.1,lncRNA,chr5:161046930-161048992	ENSG00000250888.1,RP11-168A11.1.1,lncRNA,chr5:79268157-79299205	ENSG00000221464.1,MIR1271,miRNA,chr5:175727554-175727640	NA	0	0	0	0	0	0	0	1	0	1	0	0	0	2
ENSG00000177151.3,OR2T35,coding,chr1:246868210-246869182	ENSG00000184724.4,KRTAP6-1,coding,chr21:30907620-30911767	ENSG00000250888.1,RP11-168A11.1.1,lncRNA,chr5:79268157-79299205	NA	ENSG00000221464.1,MIR1271,miRNA,chr5:175727554-175727640	NA	0	0	0	0	0	0	0	0	1	0	0	0	0	1
ENSG00000177151.3,OR2T35,coding,chr1:246868210-246869182	NA	ENSG00000250888.1,RP11-168A11.1.1,lncRNA,chr5:79268157-79299205	NA	ENSG00000221464.1,MIR1271,miRNA,chr5:175727554-175727640	ENSG00000207989.1,MIR493,miRNA,chr14:100405149-100405238	0	0	0	0	0	0	0	0	0	0	0	0	0	0
ENSG00000204279.3,PAGE3,coding,chrX:55301572-55308004	ENSG00000184724.4,KRTAP6-1,coding,chr21:30907620-30911767	ENSG00000250888.1,RP11-168A11.1.1,lncRNA,chr5:79268157-79299205	NA	ENSG00000221464.1,MIR1271,miRNA,chr5:175727554-175727640	NA	0	0	0	0	0	0	0	0	1	0	0	0	0	1
ENSG00000184724.4,KRTAP6-1,coding,chr21:30907620-30911767	NA	ENSG00000250888.1,RP11-168A11.1.1,lncRNA,chr5:79268157-79299205	NA	ENSG00000221464.1,MIR1271,miRNA,chr5:175727554-175727640	ENSG00000207989.1,MIR493,miRNA,chr14:100405149-100405238	0	0	0	0	0	0	0	1	0	0	0	0	0	1
ENSG00000150261.2,OR8K1,coding,chr11:55869996-55871083	NA	ENSG00000250888.1,RP11-168A11.1.1,lncRNA,chr5:79268157-79299205	ENSG00000234686.1,AC010971.1.1,lncRNA,chr7:49240278-49264958	ENSG00000221464.1,MIR1271,miRNA,chr5:175727554-175727640	NA	0	0	0	0	0	0	0	0	0	0	0	0	0	0
ENSG00000150261.2,OR8K1,coding,chr11:55869996-55871083	NA	ENSG00000250888.1,RP11-168A11.1.1,lncRNA,chr5:79268157-79299205	ENSG00000231597.1,AC007557.4.1,lncRNA,chr2:217427356-217428100	ENSG00000221464.1,MIR1271,miRNA,chr5:175727554-175727640	NA	0	0	0	0	0	0	0	0	0	0	0	0	0	0
ENSG00000150261.2,OR8K1,coding,chr11:55869996-55871083	NA	ENSG00000250888.1,RP11-168A11.1.1,lncRNA,chr5:79268157-79299205	ENSG00000236828.1,DMD-AS3,lncRNA,chrX:32682977-32684438	ENSG00000221464.1,MIR1271,miRNA,chr5:175727554-175727640	NA	0	0	0	0	0	0	0	0	0	0	0	0	0	0
ENSG00000150261.2,OR8K1,coding,chr11:55869996-55871083	NA	ENSG00000250888.1,RP11-168A11.1.1,lncRNA,chr5:79268157-79299205	NA	ENSG00000221464.1,MIR1271,miRNA,chr5:175727554-175727640	ENSG00000207989.1,MIR493,miRNA,chr14:100405149-100405238	0	0	0	0	0	0	0	0	0	0	0	0	0	0
ENSG00000150261.2,OR8K1,coding,chr11:55869996-55871083	NA	ENSG00000250888.1,RP11-168A11.1.1,lncRNA,chr5:79268157-79299205	ENSG00000234116.1,RP11-261C10.1.1,lncRNA,chr1:241235769-241237393	ENSG00000221464.1,MIR1271,miRNA,chr5:175727554-175727640	NA	0	0	0	0	0	0	0	0	0	0	0	0	0	0
ENSG00000150261.2,OR8K1,coding,chr11:55869996-55871083	NA	ENSG00000250888.1,RP11-168A11.1.1,lncRNA,chr5:79268157-79299205	ENSG00000233519.1,RP11-177F11.1.1,lncRNA,chr1:238630593-238631046	ENSG00000221464.1,MIR1271,miRNA,chr5:175727554-175727640	NA	0	0	0	0	0	0	0	0	0	0	0	0	0	0
ENSG00000211783.3,TRAV9-1,coding,chr14:21349513-21349989	NA	ENSG00000250888.1,RP11-168A11.1.1,lncRNA,chr5:79268157-79299205	ENSG00000228277.1,AC112518.3.1,lncRNA,chr4:74794882-74799108	ENSG00000221091.1,MIR1302-5,miRNA,chr20:48664579-48664729	NA	0	0	0	0	0	0	0	0	0	0	0	0	0	0
ENSG00000258691.1,RP11-404P21.8.1,coding,chr14:95740933-95800019	NA	ENSG00000250888.1,RP11-168A11.1.1,lncRNA,chr5:79268157-79299205	ENSG00000260425.1,LA16c-316G12.2.1,lncRNA,chr16:1348901-1351407	ENSG00000221091.1,MIR1302-5,miRNA,chr20:48664579-48664729	NA	0	0	0	0	0	0	0	0	0	0	0	0	0	0
ENSG00000184724.4,KRTAP6-1,coding,chr21:30907620-30911767	NA	ENSG00000253403.1,RP11-348M17.2.1,lncRNA,chr5:161046930-161048992	ENSG00000250888.1,RP11-168A11.1.1,lncRNA,chr5:79268157-79299205	ENSG00000207989.1,MIR493,miRNA,chr14:100405149-100405238	NA	0	0	0	0	0	0	0	1	0	1	0	0	0	2
ENSG00000177151.3,OR2T35,coding,chr1:246868210-246869182	ENSG00000184724.4,KRTAP6-1,coding,chr21:30907620-30911767	ENSG00000250888.1,RP11-168A11.1.1,lncRNA,chr5:79268157-79299205	NA	ENSG00000207989.1,MIR493,miRNA,chr14:100405149-100405238	NA	0	0	0	0	0	0	0	0	1	0	0	0	0	1
ENSG00000244624.2,KRTAP20-1,coding,chr21:30910620-30910874	NA	ENSG00000250888.1,RP11-168A11.1.1,lncRNA,chr5:79268157-79299205	ENSG00000234686.1,AC010971.1.1,lncRNA,chr7:49240278-49264958	ENSG00000207613.1,MIR181C,miRNA,chr19:13846512-13846622	NA	0	0	0	0	0	0	0	0	0	0	0	0	0	0
ENSG00000244624.2,KRTAP20-1,coding,chr21:30910620-30910874	NA	ENSG00000250888.1,RP11-168A11.1.1,lncRNA,chr5:79268157-79299205	ENSG00000259837.1,RP11-672L10.1.1,lncRNA,chr18:916083-917994	ENSG00000207613.1,MIR181C,miRNA,chr19:13846512-13846622	NA	0	0	0	0	0	0	0	0	0	0	0	0	0	0
ENSG00000204933.1,AC005392.1,coding,chr19:48571499-48575116	NA	ENSG00000237843.1,AC016903.2.1,lncRNA,chr2:205048323-205080640	ENSG00000234953.2,RP5-837I24.2.1,lncRNA,chr1:81752152-81795975	ENSG00000221410.1,MIR1238,miRNA,chr19:10523797-10523880	NA	0	0	0	0	0	0	0	0	0	0	1	0	0	1
ENSG00000204933.1,AC005392.1,coding,chr19:48571499-48575116	NA	ENSG00000236634.1,AC016903.1.1,lncRNA,chr2:205043043-205046805	ENSG00000237843.1,AC016903.2.1,lncRNA,chr2:205048323-205080640	ENSG00000221410.1,MIR1238,miRNA,chr19:10523797-10523880	NA	0	0	0	0	0	0	0	0	0	0	0	0	0	0
ENSG00000204933.1,AC005392.1,coding,chr19:48571499-48575116	NA	ENSG00000233519.1,RP11-177F11.1.1,lncRNA,chr1:238630593-238631046	ENSG00000237843.1,AC016903.2.1,lncRNA,chr2:205048323-205080640	ENSG00000221410.1,MIR1238,miRNA,chr19:10523797-10523880	NA	0	0	0	0	0	0	0	0	0	0	0	0	0	0
ENSG00000206536.1,OR5K3,coding,chr3:99592199-99593165	NA	ENSG00000223626.1,RP11-315H15.1.1,lncRNA,chr13:112024881-112033540	ENSG00000237843.1,AC016903.2.1,lncRNA,chr2:205048323-205080640	ENSG00000221410.1,MIR1238,miRNA,chr19:10523797-10523880	NA	0	0	0	0	0	0	0	0	0	0	0	0	0	0
ENSG00000221900.3,POM121L12,coding,chr7:53070828-53072111	NA	ENSG00000223626.1,RP11-315H15.1.1,lncRNA,chr13:112024881-112033540	ENSG00000237843.1,AC016903.2.1,lncRNA,chr2:205048323-205080640	ENSG00000221410.1,MIR1238,miRNA,chr19:10523797-10523880	NA	0	0	0	0	0	0	0	1	0	0	0	0	0	1
ENSG00000253206.1,RP11-738G5.2.1,coding,chr8:50611497-50629526	NA	ENSG00000223626.1,RP11-315H15.1.1,lncRNA,chr13:112024881-112033540	ENSG00000237843.1,AC016903.2.1,lncRNA,chr2:205048323-205080640	ENSG00000221410.1,MIR1238,miRNA,chr19:10523797-10523880	NA	0	0	0	0	0	0	0	0	0	0	0	0	0	0
ENSG00000182783.3,OR2T29,coding,chr1:246788406-246789420	NA	ENSG00000223626.1,RP11-315H15.1.1,lncRNA,chr13:112024881-112033540	ENSG00000237843.1,AC016903.2.1,lncRNA,chr2:205048323-205080640	ENSG00000221410.1,MIR1238,miRNA,chr19:10523797-10523880	NA	0	0	0	0	0	0	0	0	0	0	0	0	0	0
ENSG00000176742.1,OR51V1,coding,chr11:5177540-5178506	NA	ENSG00000237843.1,AC016903.2.1,lncRNA,chr2:205048323-205080640	ENSG00000251376.1,CTD-2313F11.2.1,lncRNA,chr5:54386012-54386725	ENSG00000221410.1,MIR1238,miRNA,chr19:10523797-10523880	NA	0	0	0	0	0	0	0	0	0	0	0	0	0	0
ENSG00000176742.1,OR51V1,coding,chr11:5177540-5178506	NA	ENSG00000223880.1,RP11-159J2.2.1,lncRNA,chr13:74722616-74724149	ENSG00000237843.1,AC016903.2.1,lncRNA,chr2:205048323-205080640	ENSG00000221410.1,MIR1238,miRNA,chr19:10523797-10523880	NA	0	0	0	0	0	0	0	0	0	0	0	0	0	0
ENSG00000176742.1,OR51V1,coding,chr11:5177540-5178506	ENSG00000150261.2,OR8K1,coding,chr11:55869996-55871083	ENSG00000237843.1,AC016903.2.1,lncRNA,chr2:205048323-205080640	NA	ENSG00000221410.1,MIR1238,miRNA,chr19:10523797-10523880	NA	0	0	0	0	0	0	0	0	0	0	0	0	0	0
ENSG00000176742.1,OR51V1,coding,chr11:5177540-5178506	NA	ENSG00000236634.1,AC016903.1.1,lncRNA,chr2:205043043-205046805	ENSG00000237843.1,AC016903.2.1,lncRNA,chr2:205048323-205080640	ENSG00000221410.1,MIR1238,miRNA,chr19:10523797-10523880	NA	0	0	0	0	0	0	0	0	0	0	0	0	0	0
ENSG00000176742.1,OR51V1,coding,chr11:5177540-5178506	NA	ENSG00000233519.1,RP11-177F11.1.1,lncRNA,chr1:238630593-238631046	ENSG00000237843.1,AC016903.2.1,lncRNA,chr2:205048323-205080640	ENSG00000221410.1,MIR1238,miRNA,chr19:10523797-10523880	NA	0	0	0	0	0	0	0	0	0	0	0	0	0	0
ENSG00000150261.2,OR8K1,coding,chr11:55869996-55871083	NA	ENSG00000237843.1,AC016903.2.1,lncRNA,chr2:205048323-205080640	ENSG00000236436.1,AC012361.1.1,lncRNA,chr2:20923011-20924902	ENSG00000221410.1,MIR1238,miRNA,chr19:10523797-10523880	NA	0	0	0	0	0	0	0	0	0	0	0	0	0	0
ENSG00000206536.1,OR5K3,coding,chr3:99592199-99593165	NA	ENSG00000237843.1,AC016903.2.1,lncRNA,chr2:205048323-205080640	ENSG00000253713.1,CTC-264O10.2.1,lncRNA,chr5:166475900-166479168	ENSG00000221410.1,MIR1238,miRNA,chr19:10523797-10523880	NA	0	0	0	0	0	0	0	0	0	0	0	0	0	0
ENSG00000221900.3,POM121L12,coding,chr7:53070828-53072111	NA	ENSG00000237843.1,AC016903.2.1,lncRNA,chr2:205048323-205080640	ENSG00000253713.1,CTC-264O10.2.1,lncRNA,chr5:166475900-166479168	ENSG00000221410.1,MIR1238,miRNA,chr19:10523797-10523880	NA	0	0	0	0	0	0	0	1	0	0	0	0	0	1
ENSG00000259680.2,AC136428.1.1,coding,chr16:33554544-33555426	NA	ENSG00000237843.1,AC016903.2.1,lncRNA,chr2:205048323-205080640	ENSG00000253713.1,CTC-264O10.2.1,lncRNA,chr5:166475900-166479168	ENSG00000221410.1,MIR1238,miRNA,chr19:10523797-10523880	NA	0	0	0	0	0	0	0	0	0	0	0	0	0	0
ENSG00000182783.3,OR2T29,coding,chr1:246788406-246789420	NA	ENSG00000237843.1,AC016903.2.1,lncRNA,chr2:205048323-205080640	ENSG00000253713.1,CTC-264O10.2.1,lncRNA,chr5:166475900-166479168	ENSG00000221410.1,MIR1238,miRNA,chr19:10523797-10523880	NA	0	0	0	0	0	0	0	0	0	0	0	0	0	0
ENSG00000150261.2,OR8K1,coding,chr11:55869996-55871083	NA	ENSG00000237843.1,AC016903.2.1,lncRNA,chr2:205048323-205080640	ENSG00000253713.1,CTC-264O10.2.1,lncRNA,chr5:166475900-166479168	ENSG00000221410.1,MIR1238,miRNA,chr19:10523797-10523880	NA	0	0	0	0	0	0	0	0	0	0	0	0	0	0
ENSG00000206536.1,OR5K3,coding,chr3:99592199-99593165	NA	ENSG00000237843.1,AC016903.2.1,lncRNA,chr2:205048323-205080640	ENSG00000249545.1,CTC-558O19.1.1,lncRNA,chr5:94340610-94342353	ENSG00000221410.1,MIR1238,miRNA,chr19:10523797-10523880	NA	0	0	0	0	0	0	0	0	0	0	0	0	0	0
ENSG00000221900.3,POM121L12,coding,chr7:53070828-53072111	NA	ENSG00000237843.1,AC016903.2.1,lncRNA,chr2:205048323-205080640	ENSG00000249545.1,CTC-558O19.1.1,lncRNA,chr5:94340610-94342353	ENSG00000221410.1,MIR1238,miRNA,chr19:10523797-10523880	NA	0	0	0	0	0	0	0	1	0	0	0	0	0	1
ENSG00000150261.2,OR8K1,coding,chr11:55869996-55871083	NA	ENSG00000237843.1,AC016903.2.1,lncRNA,chr2:205048323-205080640	ENSG00000249545.1,CTC-558O19.1.1,lncRNA,chr5:94340610-94342353	ENSG00000221410.1,MIR1238,miRNA,chr19:10523797-10523880	NA	0	0	0	0	0	0	0	0	0	0	0	0	0	0
ENSG00000206536.1,OR5K3,coding,chr3:99592199-99593165	NA	ENSG00000237843.1,AC016903.2.1,lncRNA,chr2:205048323-205080640	ENSG00000248261.1,CTD-2333K2.1.1,lncRNA,chr5:101507679-101510175	ENSG00000221410.1,MIR1238,miRNA,chr19:10523797-10523880	NA	0	0	0	0	0	0	0	0	0	0	0	0	0	0
ENSG00000206536.1,OR5K3,coding,chr3:99592199-99593165	NA	ENSG00000237843.1,AC016903.2.1,lncRNA,chr2:205048323-205080640	ENSG00000234953.2,RP5-837I24.2.1,lncRNA,chr1:81752152-81795975	ENSG00000221410.1,MIR1238,miRNA,chr19:10523797-10523880	NA	0	0	0	0	0	0	0	0	0	0	1	0	0	1
ENSG00000206536.1,OR5K3,coding,chr3:99592199-99593165	NA	ENSG00000236634.1,AC016903.1.1,lncRNA,chr2:205043043-205046805	ENSG00000237843.1,AC016903.2.1,lncRNA,chr2:205048323-205080640	ENSG00000221410.1,MIR1238,miRNA,chr19:10523797-10523880	NA	0	0	0	0	0	0	0	0	0	0	0	0	0	0
ENSG00000206536.1,OR5K3,coding,chr3:99592199-99593165	NA	ENSG00000233519.1,RP11-177F11.1.1,lncRNA,chr1:238630593-238631046	ENSG00000237843.1,AC016903.2.1,lncRNA,chr2:205048323-205080640	ENSG00000221410.1,MIR1238,miRNA,chr19:10523797-10523880	NA	0	0	0	0	0	0	0	0	0	0	0	0	0	0
ENSG00000221900.3,POM121L12,coding,chr7:53070828-53072111	NA	ENSG00000237843.1,AC016903.2.1,lncRNA,chr2:205048323-205080640	ENSG00000234953.2,RP5-837I24.2.1,lncRNA,chr1:81752152-81795975	ENSG00000221410.1,MIR1238,miRNA,chr19:10523797-10523880	NA	0	0	0	0	0	0	0	1	0	0	1	0	0	2
ENSG00000221900.3,POM121L12,coding,chr7:53070828-53072111	NA	ENSG00000236634.1,AC016903.1.1,lncRNA,chr2:205043043-205046805	ENSG00000237843.1,AC016903.2.1,lncRNA,chr2:205048323-205080640	ENSG00000221410.1,MIR1238,miRNA,chr19:10523797-10523880	NA	0	0	0	0	0	0	0	1	0	0	0	0	0	1
ENSG00000221900.3,POM121L12,coding,chr7:53070828-53072111	NA	ENSG00000233519.1,RP11-177F11.1.1,lncRNA,chr1:238630593-238631046	ENSG00000237843.1,AC016903.2.1,lncRNA,chr2:205048323-205080640	ENSG00000221410.1,MIR1238,miRNA,chr19:10523797-10523880	NA	0	0	0	0	0	0	0	1	0	0	0	0	0	1
ENSG00000253206.1,RP11-738G5.2.1,coding,chr8:50611497-50629526	NA	ENSG00000237843.1,AC016903.2.1,lncRNA,chr2:205048323-205080640	ENSG00000234953.2,RP5-837I24.2.1,lncRNA,chr1:81752152-81795975	ENSG00000221410.1,MIR1238,miRNA,chr19:10523797-10523880	NA	0	0	0	0	0	0	0	0	0	0	1	0	0	1
ENSG00000253206.1,RP11-738G5.2.1,coding,chr8:50611497-50629526	NA	ENSG00000236634.1,AC016903.1.1,lncRNA,chr2:205043043-205046805	ENSG00000237843.1,AC016903.2.1,lncRNA,chr2:205048323-205080640	ENSG00000221410.1,MIR1238,miRNA,chr19:10523797-10523880	NA	0	0	0	0	0	0	0	0	0	0	0	0	0	0
ENSG00000253206.1,RP11-738G5.2.1,coding,chr8:50611497-50629526	NA	ENSG00000233519.1,RP11-177F11.1.1,lncRNA,chr1:238630593-238631046	ENSG00000237843.1,AC016903.2.1,lncRNA,chr2:205048323-205080640	ENSG00000221410.1,MIR1238,miRNA,chr19:10523797-10523880	NA	0	0	0	0	0	0	0	0	0	0	0	0	0	0
ENSG00000259680.2,AC136428.1.1,coding,chr16:33554544-33555426	NA	ENSG00000237843.1,AC016903.2.1,lncRNA,chr2:205048323-205080640	ENSG00000248261.1,CTD-2333K2.1.1,lncRNA,chr5:101507679-101510175	ENSG00000221410.1,MIR1238,miRNA,chr19:10523797-10523880	NA	0	0	0	0	0	0	0	0	0	0	0	0	0	0
ENSG00000259680.2,AC136428.1.1,coding,chr16:33554544-33555426	NA	ENSG00000237843.1,AC016903.2.1,lncRNA,chr2:205048323-205080640	ENSG00000234953.2,RP5-837I24.2.1,lncRNA,chr1:81752152-81795975	ENSG00000221410.1,MIR1238,miRNA,chr19:10523797-10523880	NA	0	0	0	0	0	0	0	0	0	0	1	0	0	1
ENSG00000259680.2,AC136428.1.1,coding,chr16:33554544-33555426	NA	ENSG00000236634.1,AC016903.1.1,lncRNA,chr2:205043043-205046805	ENSG00000237843.1,AC016903.2.1,lncRNA,chr2:205048323-205080640	ENSG00000221410.1,MIR1238,miRNA,chr19:10523797-10523880	NA	0	0	0	0	0	0	0	0	0	0	0	0	0	0
ENSG00000259680.2,AC136428.1.1,coding,chr16:33554544-33555426	NA	ENSG00000233519.1,RP11-177F11.1.1,lncRNA,chr1:238630593-238631046	ENSG00000237843.1,AC016903.2.1,lncRNA,chr2:205048323-205080640	ENSG00000221410.1,MIR1238,miRNA,chr19:10523797-10523880	NA	0	0	0	0	0	0	0	0	0	0	0	0	0	0
ENSG00000182783.3,OR2T29,coding,chr1:246788406-246789420	NA	ENSG00000237843.1,AC016903.2.1,lncRNA,chr2:205048323-205080640	ENSG00000234953.2,RP5-837I24.2.1,lncRNA,chr1:81752152-81795975	ENSG00000221410.1,MIR1238,miRNA,chr19:10523797-10523880	NA	0	0	0	0	0	0	0	0	0	0	1	0	0	1
ENSG00000182783.3,OR2T29,coding,chr1:246788406-246789420	NA	ENSG00000236634.1,AC016903.1.1,lncRNA,chr2:205043043-205046805	ENSG00000237843.1,AC016903.2.1,lncRNA,chr2:205048323-205080640	ENSG00000221410.1,MIR1238,miRNA,chr19:10523797-10523880	NA	0	0	0	0	0	0	0	0	0	0	0	0	0	0
ENSG00000182783.3,OR2T29,coding,chr1:246788406-246789420	NA	ENSG00000233519.1,RP11-177F11.1.1,lncRNA,chr1:238630593-238631046	ENSG00000237843.1,AC016903.2.1,lncRNA,chr2:205048323-205080640	ENSG00000221410.1,MIR1238,miRNA,chr19:10523797-10523880	NA	0	0	0	0	0	0	0	0	0	0	0	0	0	0
ENSG00000150261.2,OR8K1,coding,chr11:55869996-55871083	NA	ENSG00000237843.1,AC016903.2.1,lncRNA,chr2:205048323-205080640	ENSG00000248261.1,CTD-2333K2.1.1,lncRNA,chr5:101507679-101510175	ENSG00000221410.1,MIR1238,miRNA,chr19:10523797-10523880	NA	0	0	0	0	0	0	0	0	0	0	0	0	0	0
ENSG00000150261.2,OR8K1,coding,chr11:55869996-55871083	NA	ENSG00000236634.1,AC016903.1.1,lncRNA,chr2:205043043-205046805	ENSG00000237843.1,AC016903.2.1,lncRNA,chr2:205048323-205080640	ENSG00000221410.1,MIR1238,miRNA,chr19:10523797-10523880	NA	0	0	0	0	0	0	0	0	0	0	0	0	0	0
ENSG00000150261.2,OR8K1,coding,chr11:55869996-55871083	NA	ENSG00000233519.1,RP11-177F11.1.1,lncRNA,chr1:238630593-238631046	ENSG00000237843.1,AC016903.2.1,lncRNA,chr2:205048323-205080640	ENSG00000221410.1,MIR1238,miRNA,chr19:10523797-10523880	NA	0	0	0	0	0	0	0	0	0	0	0	0	0	0
ENSG00000150261.2,OR8K1,coding,chr11:55869996-55871083	ENSG00000132631.4,C20orf79,coding,chr20:18742369-18743033	ENSG00000237843.1,AC016903.2.1,lncRNA,chr2:205048323-205080640	NA	ENSG00000221464.1,MIR1271,miRNA,chr5:175727554-175727640	NA	0	0	0	0	0	0	0	0	0	0	0	0	0	0
ENSG00000184724.4,KRTAP6-1,coding,chr21:30907620-30911767	NA	ENSG00000237843.1,AC016903.2.1,lncRNA,chr2:205048323-205080640	NA	ENSG00000221464.1,MIR1271,miRNA,chr5:175727554-175727640	ENSG00000207988.1,MIR576,miRNA,chr4:110629302-110629400	0	0	0	0	0	0	0	1	0	0	0	0	0	1
ENSG00000184724.4,KRTAP6-1,coding,chr21:30907620-30911767	NA	ENSG00000237843.1,AC016903.2.1,lncRNA,chr2:205048323-205080640	ENSG00000248338.1,RP11-472K22.2.1,lncRNA,chr4:28825117-28831882	ENSG00000221464.1,MIR1271,miRNA,chr5:175727554-175727640	NA	0	0	0	0	0	0	0	1	0	0	0	0	0	1
ENSG00000150261.2,OR8K1,coding,chr11:55869996-55871083	NA	ENSG00000237843.1,AC016903.2.1,lncRNA,chr2:205048323-205080640	ENSG00000248338.1,RP11-472K22.2.1,lncRNA,chr4:28825117-28831882	ENSG00000221464.1,MIR1271,miRNA,chr5:175727554-175727640	NA	0	0	0	0	0	0	0	0	0	0	0	0	0	0
ENSG00000150261.2,OR8K1,coding,chr11:55869996-55871083	NA	ENSG00000233519.1,RP11-177F11.1.1,lncRNA,chr1:238630593-238631046	ENSG00000237843.1,AC016903.2.1,lncRNA,chr2:205048323-205080640	ENSG00000221464.1,MIR1271,miRNA,chr5:175727554-175727640	NA	0	0	0	0	0	0	0	0	0	0	0	0	0	0
ENSG00000249008.1,RP11-487E13.1.1,coding,chr4:178400686-178406921	NA	ENSG00000237342.1,AL132796.1.1,lncRNA,chr14:98380985-98381687	ENSG00000224311.1,RP11-40H20.4.1,lncRNA,chr1:27428183-27433430	ENSG00000221525.1,MIR1185-1,miRNA,chr14:100579066-100579152	NA	0	0	0	0	0	0	0	0	0	0	0	0	0	0
ENSG00000185926.1,OR4C46,coding,chr11:51371857-51372787	NA	ENSG00000237480.1,RP5-947P14.1.1,lncRNA,chr1:106417391-106428644	ENSG00000234595.1,AC013733.3.1,lncRNA,chr2:182256084-182258679	ENSG00000207988.1,MIR576,miRNA,chr4:110629302-110629400	NA	0	0	0	0	0	0	0	0	0	0	0	0	0	0
ENSG00000204933.1,AC005392.1,coding,chr19:48571499-48575116	NA	ENSG00000250078.1,RP11-577G20.2.1,lncRNA,chr4:59123086-59126044	ENSG00000237480.1,RP5-947P14.1.1,lncRNA,chr1:106417391-106428644	ENSG00000221410.1,MIR1238,miRNA,chr19:10523797-10523880	NA	0	0	0	0	0	0	0	0	0	0	0	0	0	0
ENSG00000204933.1,AC005392.1,coding,chr19:48571499-48575116	NA	ENSG00000236634.1,AC016903.1.1,lncRNA,chr2:205043043-205046805	ENSG00000237480.1,RP5-947P14.1.1,lncRNA,chr1:106417391-106428644	ENSG00000221410.1,MIR1238,miRNA,chr19:10523797-10523880	NA	0	0	0	0	0	0	0	0	0	0	0	0	0	0
ENSG00000204933.1,AC005392.1,coding,chr19:48571499-48575116	NA	ENSG00000233519.1,RP11-177F11.1.1,lncRNA,chr1:238630593-238631046	ENSG00000237480.1,RP5-947P14.1.1,lncRNA,chr1:106417391-106428644	ENSG00000221410.1,MIR1238,miRNA,chr19:10523797-10523880	NA	0	0	0	0	0	0	0	0	0	0	0	0	0	0
ENSG00000206536.1,OR5K3,coding,chr3:99592199-99593165	NA	ENSG00000223626.1,RP11-315H15.1.1,lncRNA,chr13:112024881-112033540	ENSG00000237480.1,RP5-947P14.1.1,lncRNA,chr1:106417391-106428644	ENSG00000221410.1,MIR1238,miRNA,chr19:10523797-10523880	NA	0	0	0	0	0	0	0	0	0	0	0	0	0	0
ENSG00000221900.3,POM121L12,coding,chr7:53070828-53072111	NA	ENSG00000223626.1,RP11-315H15.1.1,lncRNA,chr13:112024881-112033540	ENSG00000237480.1,RP5-947P14.1.1,lncRNA,chr1:106417391-106428644	ENSG00000221410.1,MIR1238,miRNA,chr19:10523797-10523880	NA	0	0	0	0	0	0	0	1	0	0	0	0	0	1
ENSG00000253206.1,RP11-738G5.2.1,coding,chr8:50611497-50629526	NA	ENSG00000223626.1,RP11-315H15.1.1,lncRNA,chr13:112024881-112033540	ENSG00000237480.1,RP5-947P14.1.1,lncRNA,chr1:106417391-106428644	ENSG00000221410.1,MIR1238,miRNA,chr19:10523797-10523880	NA	0	0	0	0	0	0	0	0	0	0	0	0	0	0
ENSG00000182783.3,OR2T29,coding,chr1:246788406-246789420	NA	ENSG00000223626.1,RP11-315H15.1.1,lncRNA,chr13:112024881-112033540	ENSG00000237480.1,RP5-947P14.1.1,lncRNA,chr1:106417391-106428644	ENSG00000221410.1,MIR1238,miRNA,chr19:10523797-10523880	NA	0	0	0	0	0	0	0	0	0	0	0	0	0	0
ENSG00000176742.1,OR51V1,coding,chr11:5177540-5178506	NA	ENSG00000237480.1,RP5-947P14.1.1,lncRNA,chr1:106417391-106428644	ENSG00000251376.1,CTD-2313F11.2.1,lncRNA,chr5:54386012-54386725	ENSG00000221410.1,MIR1238,miRNA,chr19:10523797-10523880	NA	0	0	0	0	0	0	0	0	0	0	0	0	0	0
ENSG00000176742.1,OR51V1,coding,chr11:5177540-5178506	NA	ENSG00000223880.1,RP11-159J2.2.1,lncRNA,chr13:74722616-74724149	ENSG00000237480.1,RP5-947P14.1.1,lncRNA,chr1:106417391-106428644	ENSG00000221410.1,MIR1238,miRNA,chr19:10523797-10523880	NA	0	0	0	0	0	0	0	0	0	0	0	0	0	0
ENSG00000176742.1,OR51V1,coding,chr11:5177540-5178506	ENSG00000150261.2,OR8K1,coding,chr11:55869996-55871083	ENSG00000237480.1,RP5-947P14.1.1,lncRNA,chr1:106417391-106428644	NA	ENSG00000221410.1,MIR1238,miRNA,chr19:10523797-10523880	NA	0	0	0	0	0	0	0	0	0	0	0	0	0	0
ENSG00000176742.1,OR51V1,coding,chr11:5177540-5178506	NA	ENSG00000236634.1,AC016903.1.1,lncRNA,chr2:205043043-205046805	ENSG00000237480.1,RP5-947P14.1.1,lncRNA,chr1:106417391-106428644	ENSG00000221410.1,MIR1238,miRNA,chr19:10523797-10523880	NA	0	0	0	0	0	0	0	0	0	0	0	0	0	0
ENSG00000176742.1,OR51V1,coding,chr11:5177540-5178506	NA	ENSG00000233519.1,RP11-177F11.1.1,lncRNA,chr1:238630593-238631046	ENSG00000237480.1,RP5-947P14.1.1,lncRNA,chr1:106417391-106428644	ENSG00000221410.1,MIR1238,miRNA,chr19:10523797-10523880	NA	0	0	0	0	0	0	0	0	0	0	0	0	0	0
ENSG00000150261.2,OR8K1,coding,chr11:55869996-55871083	NA	ENSG00000237480.1,RP5-947P14.1.1,lncRNA,chr1:106417391-106428644	ENSG00000236436.1,AC012361.1.1,lncRNA,chr2:20923011-20924902	ENSG00000221410.1,MIR1238,miRNA,chr19:10523797-10523880	NA	0	0	0	0	0	0	0	0	0	0	0	0	0	0
ENSG00000253206.1,RP11-738G5.2.1,coding,chr8:50611497-50629526	NA	ENSG00000250078.1,RP11-577G20.2.1,lncRNA,chr4:59123086-59126044	ENSG00000237480.1,RP5-947P14.1.1,lncRNA,chr1:106417391-106428644	ENSG00000221410.1,MIR1238,miRNA,chr19:10523797-10523880	NA	0	0	0	0	0	0	0	0	0	0	0	0	0	0
ENSG00000259680.2,AC136428.1.1,coding,chr16:33554544-33555426	NA	ENSG00000250078.1,RP11-577G20.2.1,lncRNA,chr4:59123086-59126044	ENSG00000237480.1,RP5-947P14.1.1,lncRNA,chr1:106417391-106428644	ENSG00000221410.1,MIR1238,miRNA,chr19:10523797-10523880	NA	0	0	0	0	0	0	0	0	0	0	0	0	0	0
ENSG00000206536.1,OR5K3,coding,chr3:99592199-99593165	NA	ENSG00000236634.1,AC016903.1.1,lncRNA,chr2:205043043-205046805	ENSG00000237480.1,RP5-947P14.1.1,lncRNA,chr1:106417391-106428644	ENSG00000221410.1,MIR1238,miRNA,chr19:10523797-10523880	NA	0	0	0	0	0	0	0	0	0	0	0	0	0	0
ENSG00000206536.1,OR5K3,coding,chr3:99592199-99593165	NA	ENSG00000233519.1,RP11-177F11.1.1,lncRNA,chr1:238630593-238631046	ENSG00000237480.1,RP5-947P14.1.1,lncRNA,chr1:106417391-106428644	ENSG00000221410.1,MIR1238,miRNA,chr19:10523797-10523880	NA	0	0	0	0	0	0	0	0	0	0	0	0	0	0
ENSG00000221900.3,POM121L12,coding,chr7:53070828-53072111	NA	ENSG00000236634.1,AC016903.1.1,lncRNA,chr2:205043043-205046805	ENSG00000237480.1,RP5-947P14.1.1,lncRNA,chr1:106417391-106428644	ENSG00000221410.1,MIR1238,miRNA,chr19:10523797-10523880	NA	0	0	0	0	0	0	0	1	0	0	0	0	0	1
ENSG00000221900.3,POM121L12,coding,chr7:53070828-53072111	NA	ENSG00000233519.1,RP11-177F11.1.1,lncRNA,chr1:238630593-238631046	ENSG00000237480.1,RP5-947P14.1.1,lncRNA,chr1:106417391-106428644	ENSG00000221410.1,MIR1238,miRNA,chr19:10523797-10523880	NA	0	0	0	0	0	0	0	1	0	0	0	0	0	1
ENSG00000253206.1,RP11-738G5.2.1,coding,chr8:50611497-50629526	NA	ENSG00000236634.1,AC016903.1.1,lncRNA,chr2:205043043-205046805	ENSG00000237480.1,RP5-947P14.1.1,lncRNA,chr1:106417391-106428644	ENSG00000221410.1,MIR1238,miRNA,chr19:10523797-10523880	NA	0	0	0	0	0	0	0	0	0	0	0	0	0	0
ENSG00000253206.1,RP11-738G5.2.1,coding,chr8:50611497-50629526	NA	ENSG00000233519.1,RP11-177F11.1.1,lncRNA,chr1:238630593-238631046	ENSG00000237480.1,RP5-947P14.1.1,lncRNA,chr1:106417391-106428644	ENSG00000221410.1,MIR1238,miRNA,chr19:10523797-10523880	NA	0	0	0	0	0	0	0	0	0	0	0	0	0	0
ENSG00000259680.2,AC136428.1.1,coding,chr16:33554544-33555426	NA	ENSG00000236634.1,AC016903.1.1,lncRNA,chr2:205043043-205046805	ENSG00000237480.1,RP5-947P14.1.1,lncRNA,chr1:106417391-106428644	ENSG00000221410.1,MIR1238,miRNA,chr19:10523797-10523880	NA	0	0	0	0	0	0	0	0	0	0	0	0	0	0
ENSG00000259680.2,AC136428.1.1,coding,chr16:33554544-33555426	NA	ENSG00000233519.1,RP11-177F11.1.1,lncRNA,chr1:238630593-238631046	ENSG00000237480.1,RP5-947P14.1.1,lncRNA,chr1:106417391-106428644	ENSG00000221410.1,MIR1238,miRNA,chr19:10523797-10523880	NA	0	0	0	0	0	0	0	0	0	0	0	0	0	0
ENSG00000182783.3,OR2T29,coding,chr1:246788406-246789420	NA	ENSG00000236634.1,AC016903.1.1,lncRNA,chr2:205043043-205046805	ENSG00000237480.1,RP5-947P14.1.1,lncRNA,chr1:106417391-106428644	ENSG00000221410.1,MIR1238,miRNA,chr19:10523797-10523880	NA	0	0	0	0	0	0	0	0	0	0	0	0	0	0
ENSG00000182783.3,OR2T29,coding,chr1:246788406-246789420	NA	ENSG00000233519.1,RP11-177F11.1.1,lncRNA,chr1:238630593-238631046	ENSG00000237480.1,RP5-947P14.1.1,lncRNA,chr1:106417391-106428644	ENSG00000221410.1,MIR1238,miRNA,chr19:10523797-10523880	NA	0	0	0	0	0	0	0	0	0	0	0	0	0	0
ENSG00000150261.2,OR8K1,coding,chr11:55869996-55871083	NA	ENSG00000236634.1,AC016903.1.1,lncRNA,chr2:205043043-205046805	ENSG00000237480.1,RP5-947P14.1.1,lncRNA,chr1:106417391-106428644	ENSG00000221410.1,MIR1238,miRNA,chr19:10523797-10523880	NA	0	0	0	0	0	0	0	0	0	0	0	0	0	0
ENSG00000150261.2,OR8K1,coding,chr11:55869996-55871083	NA	ENSG00000233519.1,RP11-177F11.1.1,lncRNA,chr1:238630593-238631046	ENSG00000237480.1,RP5-947P14.1.1,lncRNA,chr1:106417391-106428644	ENSG00000221410.1,MIR1238,miRNA,chr19:10523797-10523880	NA	0	0	0	0	0	0	0	0	0	0	0	0	0	0
ENSG00000150261.2,OR8K1,coding,chr11:55869996-55871083	ENSG00000132631.4,C20orf79,coding,chr20:18742369-18743033	ENSG00000237480.1,RP5-947P14.1.1,lncRNA,chr1:106417391-106428644	NA	ENSG00000221464.1,MIR1271,miRNA,chr5:175727554-175727640	NA	0	0	0	0	0	0	0	0	0	0	0	0	0	0
ENSG00000150261.2,OR8K1,coding,chr11:55869996-55871083	NA	ENSG00000233519.1,RP11-177F11.1.1,lncRNA,chr1:238630593-238631046	ENSG00000237480.1,RP5-947P14.1.1,lncRNA,chr1:106417391-106428644	ENSG00000221464.1,MIR1271,miRNA,chr5:175727554-175727640	NA	0	0	0	0	0	0	0	0	0	0	0	0	0	0
ENSG00000185926.1,OR4C46,coding,chr11:51371857-51372787	NA	ENSG00000232299.1,RP1-105O18.1.1,lncRNA,chr6:112904432-112909531	ENSG00000237480.1,RP5-947P14.1.1,lncRNA,chr1:106417391-106428644	ENSG00000207988.1,MIR576,miRNA,chr4:110629302-110629400	NA	0	0	0	0	0	0	0	0	0	0	0	0	0	0
ENSG00000150261.2,OR8K1,coding,chr11:55869996-55871083	NA	ENSG00000234686.1,AC010971.1.1,lncRNA,chr7:49240278-49264958	ENSG00000259061.1,RP11-736P16.1.1,lncRNA,chr14:86472736-86525222	ENSG00000221410.1,MIR1238,miRNA,chr19:10523797-10523880	NA	0	0	0	0	0	0	0	0	0	0	0	0	0	0
ENSG00000150261.2,OR8K1,coding,chr11:55869996-55871083	NA	ENSG00000259061.1,RP11-736P16.1.1,lncRNA,chr14:86472736-86525222	ENSG00000231597.1,AC007557.4.1,lncRNA,chr2:217427356-217428100	ENSG00000221410.1,MIR1238,miRNA,chr19:10523797-10523880	NA	0	0	0	0	0	0	0	0	0	0	0	0	0	0
ENSG00000150261.2,OR8K1,coding,chr11:55869996-55871083	NA	ENSG00000234116.1,RP11-261C10.1.1,lncRNA,chr1:241235769-241237393	ENSG00000259061.1,RP11-736P16.1.1,lncRNA,chr14:86472736-86525222	ENSG00000221410.1,MIR1238,miRNA,chr19:10523797-10523880	NA	0	0	0	0	0	0	0	0	0	0	0	0	0	0
ENSG00000150261.2,OR8K1,coding,chr11:55869996-55871083	NA	ENSG00000233519.1,RP11-177F11.1.1,lncRNA,chr1:238630593-238631046	ENSG00000259061.1,RP11-736P16.1.1,lncRNA,chr14:86472736-86525222	ENSG00000221410.1,MIR1238,miRNA,chr19:10523797-10523880	NA	0	0	0	0	0	0	0	0	0	0	0	0	0	0
ENSG00000186971.2,KRTAP13-4,coding,chr21:30724442-30725087	NA	ENSG00000230690.1,AC013402.5.1,lncRNA,chr2:104642226-104647727	NA	ENSG00000221287.1,MIR1289-2,miRNA,chr5:132791186-132791297	ENSG00000207802.1,MIR646,miRNA,chr20:58316926-58317020	0	0	0	0	0	0	0	0	0	0	0	0	0	0
ENSG00000186971.2,KRTAP13-4,coding,chr21:30724442-30725087	NA	ENSG00000234938.2,AC012668.1.1,lncRNA,chr2:216103414-216118494	NA	ENSG00000221287.1,MIR1289-2,miRNA,chr5:132791186-132791297	ENSG00000207802.1,MIR646,miRNA,chr20:58316926-58317020	0	0	0	0	0	0	0	0	0	0	0	0	0	0
ENSG00000186971.2,KRTAP13-4,coding,chr21:30724442-30725087	NA	ENSG00000251294.1,RP11-116O11.1.1,lncRNA,chr5:24589883-24649088	NA	ENSG00000221287.1,MIR1289-2,miRNA,chr5:132791186-132791297	ENSG00000207802.1,MIR646,miRNA,chr20:58316926-58317020	0	0	0	0	0	0	0	0	0	0	0	0	0	0
ENSG00000186971.2,KRTAP13-4,coding,chr21:30724442-30725087	NA	ENSG00000237687.2,C20orf90,lncRNA,chr20:60796820-60802277	NA	ENSG00000221287.1,MIR1289-2,miRNA,chr5:132791186-132791297	ENSG00000207802.1,MIR646,miRNA,chr20:58316926-58317020	0	0	0	0	0	0	0	0	0	0	0	0	0	0
ENSG00000000005.5,TNMD,coding,chrX:99726454-99741538	NA	ENSG00000230690.1,AC013402.5.1,lncRNA,chr2:104642226-104647727	NA	ENSG00000221287.1,MIR1289-2,miRNA,chr5:132791186-132791297	ENSG00000207802.1,MIR646,miRNA,chr20:58316926-58317020	0	0	0	0	0	0	0	0	0	0	0	0	0	0
ENSG00000244624.2,KRTAP20-1,coding,chr21:30910620-30910874	NA	ENSG00000234686.1,AC010971.1.1,lncRNA,chr7:49240278-49264958	ENSG00000259981.1,AF096876.1.1,lncRNA,chr21:30383905-30392025	ENSG00000221287.1,MIR1289-2,miRNA,chr5:132791186-132791297	NA	0	0	0	0	0	0	0	0	0	0	0	0	0	0
ENSG00000244624.2,KRTAP20-1,coding,chr21:30910620-30910874	NA	ENSG00000236828.1,DMD-AS3,lncRNA,chrX:32682977-32684438	ENSG00000259981.1,AF096876.1.1,lncRNA,chr21:30383905-30392025	ENSG00000221287.1,MIR1289-2,miRNA,chr5:132791186-132791297	NA	0	0	0	0	0	0	0	0	0	0	0	0	0	0
ENSG00000000005.5,TNMD,coding,chrX:99726454-99741538	NA	ENSG00000251294.1,RP11-116O11.1.1,lncRNA,chr5:24589883-24649088	NA	ENSG00000221287.1,MIR1289-2,miRNA,chr5:132791186-132791297	ENSG00000207802.1,MIR646,miRNA,chr20:58316926-58317020	0	0	0	0	0	0	0	0	0	0	0	0	0	0
ENSG00000000005.5,TNMD,coding,chrX:99726454-99741538	NA	ENSG00000229275.1,LL22NC03-121E8.3.1,lncRNA,chr22:46916022-46917710	NA	ENSG00000221287.1,MIR1289-2,miRNA,chr5:132791186-132791297	ENSG00000207802.1,MIR646,miRNA,chr20:58316926-58317020	0	0	0	0	0	0	0	0	0	0	0	0	0	0
ENSG00000244624.2,KRTAP20-1,coding,chr21:30910620-30910874	NA	ENSG00000234686.1,AC010971.1.1,lncRNA,chr7:49240278-49264958	ENSG00000231597.1,AC007557.4.1,lncRNA,chr2:217427356-217428100	ENSG00000221287.1,MIR1289-2,miRNA,chr5:132791186-132791297	NA	0	0	0	0	0	0	0	0	0	0	0	0	0	0
ENSG00000244624.2,KRTAP20-1,coding,chr21:30910620-30910874	NA	ENSG00000236828.1,DMD-AS3,lncRNA,chrX:32682977-32684438	ENSG00000234686.1,AC010971.1.1,lncRNA,chr7:49240278-49264958	ENSG00000221287.1,MIR1289-2,miRNA,chr5:132791186-132791297	NA	0	0	0	0	0	0	0	0	0	0	0	0	0	0
ENSG00000259164.1,RP11-463C8.4.1,coding,chr14:76634406-76761558	NA	ENSG00000257470.1,RP11-397H6.1.1,lncRNA,chr12:95941929-95969038	ENSG00000253551.1,RP11-26M5.2.1,lncRNA,chr8:53269474-53274693	ENSG00000207726.1,MIR455,miRNA,chr9:116011534-116011630	NA	0	0	0	0	0	0	0	0	0	0	0	0	0	0
ENSG00000259164.1,RP11-463C8.4.1,coding,chr14:76634406-76761558	NA	ENSG00000258747.1,RP11-163M18.1.1,lncRNA,chr14:44046359-44077466	ENSG00000253551.1,RP11-26M5.2.1,lncRNA,chr8:53269474-53274693	ENSG00000207726.1,MIR455,miRNA,chr9:116011534-116011630	NA	0	0	0	0	0	0	0	0	0	0	0	0	0	0
ENSG00000183054.6,RGPD6,coding,chr2:110705925-111051231	NA	ENSG00000228426.1,RP11-402L1.11.1,lncRNA,chr10:43481121-43482459	NA	ENSG00000199187.1,MIR365B,miRNA,chr17:26926542-26926653	ENSG00000207597.1,MIR490,miRNA,chr7:136238453-136238581	0	0	0	0	0	0	0	0	0	0	0	0	0	0
ENSG00000184724.4,KRTAP6-1,coding,chr21:30907620-30911767	ENSG00000179709.3,NLRP8,coding,chr19:61151009-61191807	ENSG00000228426.1,RP11-402L1.11.1,lncRNA,chr10:43481121-43482459	NA	ENSG00000221464.1,MIR1271,miRNA,chr5:175727554-175727640	NA	0	0	0	0	0	0	0	1	0	0	0	0	0	1
ENSG00000184724.4,KRTAP6-1,coding,chr21:30907620-30911767	NA	ENSG00000253403.1,RP11-348M17.2.1,lncRNA,chr5:161046930-161048992	ENSG00000228426.1,RP11-402L1.11.1,lncRNA,chr10:43481121-43482459	ENSG00000221464.1,MIR1271,miRNA,chr5:175727554-175727640	NA	0	0	0	0	0	0	0	1	0	1	0	0	0	2
ENSG00000177151.3,OR2T35,coding,chr1:246868210-246869182	ENSG00000184724.4,KRTAP6-1,coding,chr21:30907620-30911767	ENSG00000228426.1,RP11-402L1.11.1,lncRNA,chr10:43481121-43482459	NA	ENSG00000221464.1,MIR1271,miRNA,chr5:175727554-175727640	NA	0	0	0	0	0	0	0	0	1	0	0	0	0	1
ENSG00000177151.3,OR2T35,coding,chr1:246868210-246869182	NA	ENSG00000228426.1,RP11-402L1.11.1,lncRNA,chr10:43481121-43482459	NA	ENSG00000221464.1,MIR1271,miRNA,chr5:175727554-175727640	ENSG00000207989.1,MIR493,miRNA,chr14:100405149-100405238	0	0	0	0	0	0	0	0	0	0	0	0	0	0
ENSG00000204279.3,PAGE3,coding,chrX:55301572-55308004	ENSG00000184724.4,KRTAP6-1,coding,chr21:30907620-30911767	ENSG00000228426.1,RP11-402L1.11.1,lncRNA,chr10:43481121-43482459	NA	ENSG00000221464.1,MIR1271,miRNA,chr5:175727554-175727640	NA	0	0	0	0	0	0	0	0	1	0	0	0	0	1
ENSG00000184724.4,KRTAP6-1,coding,chr21:30907620-30911767	NA	ENSG00000228426.1,RP11-402L1.11.1,lncRNA,chr10:43481121-43482459	NA	ENSG00000221464.1,MIR1271,miRNA,chr5:175727554-175727640	ENSG00000207989.1,MIR493,miRNA,chr14:100405149-100405238	0	0	0	0	0	0	0	1	0	0	0	0	0	1
ENSG00000150261.2,OR8K1,coding,chr11:55869996-55871083	NA	ENSG00000234686.1,AC010971.1.1,lncRNA,chr7:49240278-49264958	ENSG00000228426.1,RP11-402L1.11.1,lncRNA,chr10:43481121-43482459	ENSG00000221464.1,MIR1271,miRNA,chr5:175727554-175727640	NA	0	0	0	0	0	0	0	0	0	0	0	0	0	0
ENSG00000150261.2,OR8K1,coding,chr11:55869996-55871083	NA	ENSG00000228426.1,RP11-402L1.11.1,lncRNA,chr10:43481121-43482459	ENSG00000231597.1,AC007557.4.1,lncRNA,chr2:217427356-217428100	ENSG00000221464.1,MIR1271,miRNA,chr5:175727554-175727640	NA	0	0	0	0	0	0	0	0	0	0	0	0	0	0
ENSG00000150261.2,OR8K1,coding,chr11:55869996-55871083	NA	ENSG00000236828.1,DMD-AS3,lncRNA,chrX:32682977-32684438	ENSG00000228426.1,RP11-402L1.11.1,lncRNA,chr10:43481121-43482459	ENSG00000221464.1,MIR1271,miRNA,chr5:175727554-175727640	NA	0	0	0	0	0	0	0	0	0	0	0	0	0	0
ENSG00000150261.2,OR8K1,coding,chr11:55869996-55871083	NA	ENSG00000228426.1,RP11-402L1.11.1,lncRNA,chr10:43481121-43482459	NA	ENSG00000221464.1,MIR1271,miRNA,chr5:175727554-175727640	ENSG00000207989.1,MIR493,miRNA,chr14:100405149-100405238	0	0	0	0	0	0	0	0	0	0	0	0	0	0
ENSG00000150261.2,OR8K1,coding,chr11:55869996-55871083	NA	ENSG00000234116.1,RP11-261C10.1.1,lncRNA,chr1:241235769-241237393	ENSG00000228426.1,RP11-402L1.11.1,lncRNA,chr10:43481121-43482459	ENSG00000221464.1,MIR1271,miRNA,chr5:175727554-175727640	NA	0	0	0	0	0	0	0	0	0	0	0	0	0	0
ENSG00000150261.2,OR8K1,coding,chr11:55869996-55871083	NA	ENSG00000233519.1,RP11-177F11.1.1,lncRNA,chr1:238630593-238631046	ENSG00000228426.1,RP11-402L1.11.1,lncRNA,chr10:43481121-43482459	ENSG00000221464.1,MIR1271,miRNA,chr5:175727554-175727640	NA	0	0	0	0	0	0	0	0	0	0	0	0	0	0
ENSG00000184724.4,KRTAP6-1,coding,chr21:30907620-30911767	NA	ENSG00000253403.1,RP11-348M17.2.1,lncRNA,chr5:161046930-161048992	ENSG00000228426.1,RP11-402L1.11.1,lncRNA,chr10:43481121-43482459	ENSG00000207989.1,MIR493,miRNA,chr14:100405149-100405238	NA	0	0	0	0	0	0	0	1	0	1	0	0	0	2
ENSG00000177151.3,OR2T35,coding,chr1:246868210-246869182	ENSG00000184724.4,KRTAP6-1,coding,chr21:30907620-30911767	ENSG00000228426.1,RP11-402L1.11.1,lncRNA,chr10:43481121-43482459	NA	ENSG00000207989.1,MIR493,miRNA,chr14:100405149-100405238	NA	0	0	0	0	0	0	0	0	1	0	0	0	0	1
ENSG00000204398.4,RP11-65D24.2.1,coding,chr13:111038638-111122956	NA	ENSG00000224091.1,AC104389.16.1,lncRNA,chr11:5182846-5185114	ENSG00000228011.1,LINC00413,lncRNA,chr13:77134635-77135276	ENSG00000207805.1,MIR483,miRNA,chr11:2111939-2112015	NA	0	0	0	0	0	0	0	1	0	0	0	0	0	1
ENSG00000204398.4,RP11-65D24.2.1,coding,chr13:111038638-111122956	NA	ENSG00000224091.1,AC104389.16.1,lncRNA,chr11:5182846-5185114	NA	ENSG00000207805.1,MIR483,miRNA,chr11:2111939-2112015	ENSG00000207574.1,MIR661,miRNA,chr8:145091346-145091435	0	0	0	0	0	0	0	1	0	0	0	0	0	1
ENSG00000204398.4,RP11-65D24.2.1,coding,chr13:111038638-111122956	NA	ENSG00000224091.1,AC104389.16.1,lncRNA,chr11:5182846-5185114	ENSG00000259620.1,RP11-133L19.1.1,lncRNA,chr15:85283031-85332661	ENSG00000207805.1,MIR483,miRNA,chr11:2111939-2112015	NA	0	0	0	0	0	0	0	1	0	0	0	0	0	1
ENSG00000204398.4,RP11-65D24.2.1,coding,chr13:111038638-111122956	NA	ENSG00000224091.1,AC104389.16.1,lncRNA,chr11:5182846-5185114	ENSG00000233570.1,RP11-194G10.1.1,lncRNA,chr3:16552830-16557884	ENSG00000207805.1,MIR483,miRNA,chr11:2111939-2112015	NA	0	0	0	0	0	0	0	1	0	0	0	0	0	1
ENSG00000204398.4,RP11-65D24.2.1,coding,chr13:111038638-111122956	NA	ENSG00000224091.1,AC104389.16.1,lncRNA,chr11:5182846-5185114	ENSG00000260425.1,LA16c-316G12.2.1,lncRNA,chr16:1348901-1351407	ENSG00000207805.1,MIR483,miRNA,chr11:2111939-2112015	NA	0	0	0	0	0	0	0	1	0	0	0	0	0	1
ENSG00000204398.4,RP11-65D24.2.1,coding,chr13:111038638-111122956	NA	ENSG00000249747.1,RP11-308K2.1.1,lncRNA,chr4:188360133-188367494	ENSG00000224091.1,AC104389.16.1,lncRNA,chr11:5182846-5185114	ENSG00000207805.1,MIR483,miRNA,chr11:2111939-2112015	NA	0	0	0	0	0	0	0	1	0	1	0	0	0	2
ENSG00000244624.2,KRTAP20-1,coding,chr21:30910620-30910874	NA	ENSG00000248744.1,RP11-362I1.1.1,lncRNA,chr4:44706313-44748426	ENSG00000224091.1,AC104389.16.1,lncRNA,chr11:5182846-5185114	ENSG00000207805.1,MIR483,miRNA,chr11:2111939-2112015	NA	0	0	0	0	0	0	0	0	0	0	0	0	0	0
ENSG00000177174.1,OR14C36,coding,chr1:246578699-246579638	NA	ENSG00000224091.1,AC104389.16.1,lncRNA,chr11:5182846-5185114	ENSG00000225974.1,AC005550.5.1,lncRNA,chr7:15695224-15697004	ENSG00000207805.1,MIR483,miRNA,chr11:2111939-2112015	NA	0	0	0	0	0	0	0	0	0	0	0	0	0	0
ENSG00000257198.1,AL589645.1,coding,chr9:34822641-34828583	NA	ENSG00000230051.1,CTA-929C8.8.1,lncRNA,chr22:26057747-26105226	ENSG00000224091.1,AC104389.16.1,lncRNA,chr11:5182846-5185114	ENSG00000207805.1,MIR483,miRNA,chr11:2111939-2112015	NA	0	0	0	0	0	0	0	0	0	0	0	0	0	0
ENSG00000244624.2,KRTAP20-1,coding,chr21:30910620-30910874	NA	ENSG00000234686.1,AC010971.1.1,lncRNA,chr7:49240278-49264958	ENSG00000224091.1,AC104389.16.1,lncRNA,chr11:5182846-5185114	ENSG00000207805.1,MIR483,miRNA,chr11:2111939-2112015	NA	0	0	0	0	0	0	0	0	0	0	0	0	0	0
ENSG00000244624.2,KRTAP20-1,coding,chr21:30910620-30910874	NA	ENSG00000259077.1,RP11-804L24.2.1,lncRNA,chr14:87347078-87374436	ENSG00000224091.1,AC104389.16.1,lncRNA,chr11:5182846-5185114	ENSG00000207805.1,MIR483,miRNA,chr11:2111939-2112015	NA	0	0	0	0	0	0	0	0	0	0	0	0	0	0
ENSG00000177174.1,OR14C36,coding,chr1:246578699-246579638	NA	ENSG00000234116.1,RP11-261C10.1.1,lncRNA,chr1:241235769-241237393	ENSG00000224091.1,AC104389.16.1,lncRNA,chr11:5182846-5185114	ENSG00000207805.1,MIR483,miRNA,chr11:2111939-2112015	NA	0	0	0	0	0	0	0	0	0	0	0	0	0	0
ENSG00000214891.4,TRIM64C,coding,chr11:49031841-49037240	NA	ENSG00000224091.1,AC104389.16.1,lncRNA,chr11:5182846-5185114	ENSG00000231529.1,RP11-410C4.4.1,lncRNA,chr1:218725068-218727008	ENSG00000207805.1,MIR483,miRNA,chr11:2111939-2112015	NA	0	0	0	0	0	0	0	1	0	0	0	0	0	1
ENSG00000244624.2,KRTAP20-1,coding,chr21:30910620-30910874	NA	ENSG00000224091.1,AC104389.16.1,lncRNA,chr11:5182846-5185114	ENSG00000231597.1,AC007557.4.1,lncRNA,chr2:217427356-217428100	ENSG00000207805.1,MIR483,miRNA,chr11:2111939-2112015	NA	0	0	0	0	0	0	0	0	0	0	0	0	0	0
ENSG00000244624.2,KRTAP20-1,coding,chr21:30910620-30910874	NA	ENSG00000224091.1,AC104389.16.1,lncRNA,chr11:5182846-5185114	ENSG00000254178.1,RP11-299D14.2.1,lncRNA,chr8:25747561-25753568	ENSG00000207805.1,MIR483,miRNA,chr11:2111939-2112015	NA	0	0	0	0	0	0	0	0	0	0	0	0	0	0
ENSG00000244624.2,KRTAP20-1,coding,chr21:30910620-30910874	NA	ENSG00000236828.1,DMD-AS3,lncRNA,chrX:32682977-32684438	ENSG00000224091.1,AC104389.16.1,lncRNA,chr11:5182846-5185114	ENSG00000207805.1,MIR483,miRNA,chr11:2111939-2112015	NA	0	0	0	0	0	0	0	0	0	0	0	0	0	0
ENSG00000244624.2,KRTAP20-1,coding,chr21:30910620-30910874	NA	ENSG00000249747.1,RP11-308K2.1.1,lncRNA,chr4:188360133-188367494	ENSG00000224091.1,AC104389.16.1,lncRNA,chr11:5182846-5185114	ENSG00000207805.1,MIR483,miRNA,chr11:2111939-2112015	NA	0	0	0	0	0	0	0	0	0	1	0	0	0	1
ENSG00000214819.1,CDRT15L2,coding,chr17:20423628-20424816	ENSG00000206106.2,KRTAP22-2,coding,chr21:30884294-30884587	ENSG00000261154.1,RP11-571O6.1.1,lncRNA,chr16:76182203-76202079	NA	ENSG00000199187.1,MIR365B,miRNA,chr17:26926542-26926653	NA	0	0	0	0	0	0	0	0	0	0	0	0	0	0
ENSG00000206106.2,KRTAP22-2,coding,chr21:30884294-30884587	NA	ENSG00000261154.1,RP11-571O6.1.1,lncRNA,chr16:76182203-76202079	NA	ENSG00000199187.1,MIR365B,miRNA,chr17:26926542-26926653	ENSG00000207597.1,MIR490,miRNA,chr7:136238453-136238581	0	0	0	0	0	0	0	0	0	0	0	0	0	0
ENSG00000183054.6,RGPD6,coding,chr2:110705925-111051231	NA	ENSG00000261154.1,RP11-571O6.1.1,lncRNA,chr16:76182203-76202079	NA	ENSG00000199187.1,MIR365B,miRNA,chr17:26926542-26926653	ENSG00000207597.1,MIR490,miRNA,chr7:136238453-136238581	0	0	0	0	0	0	0	0	0	0	0	0	0	0
ENSG00000237247.2,MBD3L5,coding,chr19:6981588-6984053	NA	ENSG00000261154.1,RP11-571O6.1.1,lncRNA,chr16:76182203-76202079	ENSG00000227090.1,AP000402.3.1,lncRNA,chr21:25180860-25196941	ENSG00000208017.1,MIR140,miRNA,chr16:68524484-68524584	NA	0	0	0	0	0	0	0	0	0	0	0	0	0	0
ENSG00000259164.1,RP11-463C8.4.1,coding,chr14:76634406-76761558	ENSG00000162727.3,OR2M5,coding,chr1:246375072-246376011	ENSG00000234519.1,RP3-495K2.1.1,lncRNA,chr6:169209837-169211444	NA	ENSG00000212044.1,MIR548U,miRNA,chr1:147589954-147590046	NA	0	0	0	0	0	0	0	0	0	0	0	0	0	0
ENSG00000259164.1,RP11-463C8.4.1,coding,chr14:76634406-76761558	NA	ENSG00000258747.1,RP11-163M18.1.1,lncRNA,chr14:44046359-44077466	ENSG00000234519.1,RP3-495K2.1.1,lncRNA,chr6:169209837-169211444	ENSG00000207726.1,MIR455,miRNA,chr9:116011534-116011630	NA	0	0	0	0	0	0	0	0	0	0	0	0	0	0
ENSG00000259164.1,RP11-463C8.4.1,coding,chr14:76634406-76761558	NA	ENSG00000258747.1,RP11-163M18.1.1,lncRNA,chr14:44046359-44077466	ENSG00000234519.1,RP3-495K2.1.1,lncRNA,chr6:169209837-169211444	ENSG00000207863.1,MIR125B2,miRNA,chr21:16884427-16884516	NA	0	0	0	0	0	0	0	0	0	0	0	0	0	0
ENSG00000259164.1,RP11-463C8.4.1,coding,chr14:76634406-76761558	ENSG00000258691.1,RP11-404P21.8.1,coding,chr14:95740933-95800019	ENSG00000234519.1,RP3-495K2.1.1,lncRNA,chr6:169209837-169211444	NA	ENSG00000212044.1,MIR548U,miRNA,chr1:147589954-147590046	NA	0	0	0	0	0	0	0	0	0	0	0	0	0	0
ENSG00000259164.1,RP11-463C8.4.1,coding,chr14:76634406-76761558	NA	ENSG00000258747.1,RP11-163M18.1.1,lncRNA,chr14:44046359-44077466	ENSG00000234519.1,RP3-495K2.1.1,lncRNA,chr6:169209837-169211444	ENSG00000212044.1,MIR548U,miRNA,chr1:147589954-147590046	NA	0	0	0	0	0	0	0	0	0	0	0	0	0	0
ENSG00000259164.1,RP11-463C8.4.1,coding,chr14:76634406-76761558	NA	ENSG00000233069.1,RP5-930J4.2.1,lncRNA,chr1:20931959-20933032	ENSG00000224879.1,AC011754.1.1,lncRNA,chr2:79239007-79266157	ENSG00000221525.1,MIR1185-1,miRNA,chr14:100579066-100579152	NA	0	0	0	0	0	0	0	0	0	1	0	0	0	1
ENSG00000186967.6,KRTAP19-4,coding,chr21:30791012-30791322	NA	ENSG00000224879.1,AC011754.1.1,lncRNA,chr2:79239007-79266157	ENSG00000231492.2,AP003774.5.1,lncRNA,chr11:63944438-63956718	ENSG00000221525.1,MIR1185-1,miRNA,chr14:100579066-100579152	NA	0	0	0	0	0	0	0	0	0	0	0	0	0	0
ENSG00000186967.6,KRTAP19-4,coding,chr21:30791012-30791322	NA	ENSG00000234767.1,RP11-223F20.2.1,lncRNA,chr13:65338306-65350352	ENSG00000224879.1,AC011754.1.1,lncRNA,chr2:79239007-79266157	ENSG00000221525.1,MIR1185-1,miRNA,chr14:100579066-100579152	NA	0	0	0	0	0	0	0	0	0	0	0	0	0	0
ENSG00000259164.1,RP11-463C8.4.1,coding,chr14:76634406-76761558	NA	ENSG00000234767.1,RP11-223F20.2.1,lncRNA,chr13:65338306-65350352	ENSG00000224879.1,AC011754.1.1,lncRNA,chr2:79239007-79266157	ENSG00000221525.1,MIR1185-1,miRNA,chr14:100579066-100579152	NA	0	0	0	0	0	0	0	0	0	0	0	0	0	0
ENSG00000213578.4,CPLX3,coding,chr15:72905940-72911194	NA	ENSG00000232624.1,RP11-478H13.3.1,lncRNA,chr10:29135881-29137154	ENSG00000258254.1,RP11-162N7.1.1,lncRNA,chr12:113543948-113545110	ENSG00000208017.1,MIR140,miRNA,chr16:68524484-68524584	NA	0	0	0	0	0	0	0	0	0	0	0	0	0	0
ENSG00000213578.4,CPLX3,coding,chr15:72905940-72911194	NA	ENSG00000232464.1,CTA-125H2.1.1,lncRNA,chr22:24685039-24709492	ENSG00000258254.1,RP11-162N7.1.1,lncRNA,chr12:113543948-113545110	ENSG00000208017.1,MIR140,miRNA,chr16:68524484-68524584	NA	0	0	0	0	0	0	0	0	0	0	0	0	0	0
ENSG00000213578.4,CPLX3,coding,chr15:72905940-72911194	NA	ENSG00000232624.1,RP11-478H13.3.1,lncRNA,chr10:29135881-29137154	ENSG00000225378.1,AC015977.6.1,lncRNA,chr2:26747625-26750836	ENSG00000252466.1,MIR2115,miRNA,chr3:48332853-48332953	NA	0	0	0	0	0	0	0	0	0	0	0	0	0	0
ENSG00000213578.4,CPLX3,coding,chr15:72905940-72911194	NA	ENSG00000249343.1,CTD-2275D24.2.1,lncRNA,chr5:73654066-73659878	ENSG00000248942.1,CTD-2275D24.4.1,lncRNA,chr5:73637990-73639906	ENSG00000252466.1,MIR2115,miRNA,chr3:48332853-48332953	NA	0	0	0	0	0	0	0	0	0	0	0	0	0	0
ENSG00000213578.4,CPLX3,coding,chr15:72905940-72911194	NA	ENSG00000249343.1,CTD-2275D24.2.1,lncRNA,chr5:73654066-73659878	ENSG00000254178.1,RP11-299D14.2.1,lncRNA,chr8:25747561-25753568	ENSG00000252466.1,MIR2115,miRNA,chr3:48332853-48332953	NA	0	0	0	0	0	0	0	0	0	0	0	0	0	0
ENSG00000213578.4,CPLX3,coding,chr15:72905940-72911194	NA	ENSG00000232624.1,RP11-478H13.3.1,lncRNA,chr10:29135881-29137154	NA	ENSG00000208017.1,MIR140,miRNA,chr16:68524484-68524584	ENSG00000252466.1,MIR2115,miRNA,chr3:48332853-48332953	0	0	0	0	0	0	0	0	0	0	0	0	0	0
ENSG00000213578.4,CPLX3,coding,chr15:72905940-72911194	NA	ENSG00000254178.1,RP11-299D14.2.1,lncRNA,chr8:25747561-25753568	ENSG00000232624.1,RP11-478H13.3.1,lncRNA,chr10:29135881-29137154	ENSG00000252466.1,MIR2115,miRNA,chr3:48332853-48332953	NA	0	0	0	0	0	0	0	0	0	0	0	0	0	0
ENSG00000213578.4,CPLX3,coding,chr15:72905940-72911194	ENSG00000105398.3,SULT2A1,coding,chr19:53065534-53081466	ENSG00000232624.1,RP11-478H13.3.1,lncRNA,chr10:29135881-29137154	NA	ENSG00000252466.1,MIR2115,miRNA,chr3:48332853-48332953	NA	0	0	0	0	0	0	0	0	0	0	0	0	0	0
ENSG00000213578.4,CPLX3,coding,chr15:72905940-72911194	NA	ENSG00000226364.1,AC102948.2.1,lncRNA,chr17:48294479-48331947	ENSG00000232624.1,RP11-478H13.3.1,lncRNA,chr10:29135881-29137154	ENSG00000252466.1,MIR2115,miRNA,chr3:48332853-48332953	NA	0	0	0	0	0	0	0	0	0	0	0	0	0	0
ENSG00000213578.4,CPLX3,coding,chr15:72905940-72911194	NA	ENSG00000232624.1,RP11-478H13.3.1,lncRNA,chr10:29135881-29137154	ENSG00000232464.1,CTA-125H2.1.1,lncRNA,chr22:24685039-24709492	ENSG00000252466.1,MIR2115,miRNA,chr3:48332853-48332953	NA	0	0	0	0	0	0	0	0	0	0	0	0	0	0
ENSG00000213578.4,CPLX3,coding,chr15:72905940-72911194	NA	ENSG00000240777.2,RP11-58O15.1.1,lncRNA,chr3:55619670-55622172	ENSG00000232624.1,RP11-478H13.3.1,lncRNA,chr10:29135881-29137154	ENSG00000252466.1,MIR2115,miRNA,chr3:48332853-48332953	NA	0	0	0	0	0	0	0	0	0	0	0	0	0	0
ENSG00000213578.4,CPLX3,coding,chr15:72905940-72911194	NA	ENSG00000251170.1,RP11-729M20.1.1,lncRNA,chr4:105370985-105551641	ENSG00000236653.1,AC005235.1.1,lncRNA,chr2:198872331-198948066	ENSG00000252466.1,MIR2115,miRNA,chr3:48332853-48332953	NA	0	0	0	0	0	0	0	0	0	0	0	0	0	0
ENSG00000213578.4,CPLX3,coding,chr15:72905940-72911194	NA	ENSG00000251170.1,RP11-729M20.1.1,lncRNA,chr4:105370985-105551641	ENSG00000254178.1,RP11-299D14.2.1,lncRNA,chr8:25747561-25753568	ENSG00000252466.1,MIR2115,miRNA,chr3:48332853-48332953	NA	0	0	0	0	0	0	0	0	0	0	0	0	0	0
ENSG00000213578.4,CPLX3,coding,chr15:72905940-72911194	NA	ENSG00000242790.1,RP11-451G4.3.1,lncRNA,chr3:156491670-156494659	ENSG00000236653.1,AC005235.1.1,lncRNA,chr2:198872331-198948066	ENSG00000252466.1,MIR2115,miRNA,chr3:48332853-48332953	NA	0	0	0	0	0	0	0	0	0	0	0	0	0	0
ENSG00000213578.4,CPLX3,coding,chr15:72905940-72911194	NA	ENSG00000242790.1,RP11-451G4.3.1,lncRNA,chr3:156491670-156494659	ENSG00000254178.1,RP11-299D14.2.1,lncRNA,chr8:25747561-25753568	ENSG00000252466.1,MIR2115,miRNA,chr3:48332853-48332953	NA	0	0	0	0	0	0	0	0	0	0	0	0	0	0
ENSG00000213578.4,CPLX3,coding,chr15:72905940-72911194	NA	ENSG00000248942.1,CTD-2275D24.4.1,lncRNA,chr5:73637990-73639906	ENSG00000254178.1,RP11-299D14.2.1,lncRNA,chr8:25747561-25753568	ENSG00000252466.1,MIR2115,miRNA,chr3:48332853-48332953	NA	0	0	0	0	0	0	0	0	0	0	0	0	0	0
ENSG00000213578.4,CPLX3,coding,chr15:72905940-72911194	NA	ENSG00000248942.1,CTD-2275D24.4.1,lncRNA,chr5:73637990-73639906	ENSG00000249877.1,RP11-706F1.2.1,lncRNA,chr4:190446824-190449484	ENSG00000252466.1,MIR2115,miRNA,chr3:48332853-48332953	NA	0	0	0	0	0	0	0	0	0	0	0	0	0	0
ENSG00000213578.4,CPLX3,coding,chr15:72905940-72911194	NA	ENSG00000236828.1,DMD-AS3,lncRNA,chrX:32682977-32684438	ENSG00000234686.1,AC010971.1.1,lncRNA,chr7:49240278-49264958	ENSG00000252466.1,MIR2115,miRNA,chr3:48332853-48332953	NA	0	0	0	0	0	0	0	0	0	0	0	0	0	0
ENSG00000213578.4,CPLX3,coding,chr15:72905940-72911194	NA	ENSG00000250902.1,RP11-301H24.4.1,lncRNA,chr4:146655216-146657720	ENSG00000234686.1,AC010971.1.1,lncRNA,chr7:49240278-49264958	ENSG00000252466.1,MIR2115,miRNA,chr3:48332853-48332953	NA	0	0	0	0	0	0	0	0	0	0	0	0	0	0
ENSG00000244624.2,KRTAP20-1,coding,chr21:30910620-30910874	ENSG00000213578.4,CPLX3,coding,chr15:72905940-72911194	ENSG00000234686.1,AC010971.1.1,lncRNA,chr7:49240278-49264958	NA	ENSG00000252466.1,MIR2115,miRNA,chr3:48332853-48332953	NA	0	0	0	0	0	0	0	0	0	0	0	0	0	0
ENSG00000213578.4,CPLX3,coding,chr15:72905940-72911194	NA	ENSG00000233519.1,RP11-177F11.1.1,lncRNA,chr1:238630593-238631046	ENSG00000234686.1,AC010971.1.1,lncRNA,chr7:49240278-49264958	ENSG00000252466.1,MIR2115,miRNA,chr3:48332853-48332953	NA	0	0	0	0	0	0	0	0	0	0	0	0	0	0
ENSG00000213578.4,CPLX3,coding,chr15:72905940-72911194	NA	ENSG00000226364.1,AC102948.2.1,lncRNA,chr17:48294479-48331947	NA	ENSG00000208017.1,MIR140,miRNA,chr16:68524484-68524584	ENSG00000252466.1,MIR2115,miRNA,chr3:48332853-48332953	0	0	0	0	0	0	0	0	0	0	0	0	0	0
ENSG00000213578.4,CPLX3,coding,chr15:72905940-72911194	NA	ENSG00000232464.1,CTA-125H2.1.1,lncRNA,chr22:24685039-24709492	NA	ENSG00000208017.1,MIR140,miRNA,chr16:68524484-68524584	ENSG00000252466.1,MIR2115,miRNA,chr3:48332853-48332953	0	0	0	0	0	0	0	0	0	0	0	0	0	0
ENSG00000213578.4,CPLX3,coding,chr15:72905940-72911194	NA	ENSG00000240777.2,RP11-58O15.1.1,lncRNA,chr3:55619670-55622172	NA	ENSG00000208017.1,MIR140,miRNA,chr16:68524484-68524584	ENSG00000252466.1,MIR2115,miRNA,chr3:48332853-48332953	0	0	0	0	0	0	0	0	0	0	0	0	0	0
ENSG00000213578.4,CPLX3,coding,chr15:72905940-72911194	NA	ENSG00000250902.1,RP11-301H24.4.1,lncRNA,chr4:146655216-146657720	ENSG00000236653.1,AC005235.1.1,lncRNA,chr2:198872331-198948066	ENSG00000252466.1,MIR2115,miRNA,chr3:48332853-48332953	NA	0	0	0	0	0	0	0	0	0	0	0	0	0	0
ENSG00000213578.4,CPLX3,coding,chr15:72905940-72911194	NA	ENSG00000233519.1,RP11-177F11.1.1,lncRNA,chr1:238630593-238631046	ENSG00000236653.1,AC005235.1.1,lncRNA,chr2:198872331-198948066	ENSG00000252466.1,MIR2115,miRNA,chr3:48332853-48332953	NA	0	0	0	0	0	0	0	0	0	0	0	0	0	0
ENSG00000213578.4,CPLX3,coding,chr15:72905940-72911194	NA	ENSG00000250902.1,RP11-301H24.4.1,lncRNA,chr4:146655216-146657720	ENSG00000254178.1,RP11-299D14.2.1,lncRNA,chr8:25747561-25753568	ENSG00000252466.1,MIR2115,miRNA,chr3:48332853-48332953	NA	0	0	0	0	0	0	0	0	0	0	0	0	0	0
ENSG00000244624.2,KRTAP20-1,coding,chr21:30910620-30910874	ENSG00000213578.4,CPLX3,coding,chr15:72905940-72911194	ENSG00000254178.1,RP11-299D14.2.1,lncRNA,chr8:25747561-25753568	NA	ENSG00000252466.1,MIR2115,miRNA,chr3:48332853-48332953	NA	0	0	0	0	0	0	0	0	0	0	0	0	0	0
ENSG00000213578.4,CPLX3,coding,chr15:72905940-72911194	NA	ENSG00000254178.1,RP11-299D14.2.1,lncRNA,chr8:25747561-25753568	ENSG00000232464.1,CTA-125H2.1.1,lncRNA,chr22:24685039-24709492	ENSG00000252466.1,MIR2115,miRNA,chr3:48332853-48332953	NA	0	0	0	0	0	0	0	0	0	0	0	0	0	0
ENSG00000213578.4,CPLX3,coding,chr15:72905940-72911194	NA	ENSG00000233519.1,RP11-177F11.1.1,lncRNA,chr1:238630593-238631046	ENSG00000254178.1,RP11-299D14.2.1,lncRNA,chr8:25747561-25753568	ENSG00000252466.1,MIR2115,miRNA,chr3:48332853-48332953	NA	0	0	0	0	0	0	0	0	0	0	0	0	0	0
ENSG00000213578.4,CPLX3,coding,chr15:72905940-72911194	NA	ENSG00000236828.1,DMD-AS3,lncRNA,chrX:32682977-32684438	ENSG00000250902.1,RP11-301H24.4.1,lncRNA,chr4:146655216-146657720	ENSG00000252466.1,MIR2115,miRNA,chr3:48332853-48332953	NA	0	0	0	0	0	0	0	0	0	0	0	0	0	0
ENSG00000244624.2,KRTAP20-1,coding,chr21:30910620-30910874	ENSG00000213578.4,CPLX3,coding,chr15:72905940-72911194	ENSG00000236828.1,DMD-AS3,lncRNA,chrX:32682977-32684438	NA	ENSG00000252466.1,MIR2115,miRNA,chr3:48332853-48332953	NA	0	0	0	0	0	0	0	0	0	0	0	0	0	0
ENSG00000213578.4,CPLX3,coding,chr15:72905940-72911194	NA	ENSG00000236828.1,DMD-AS3,lncRNA,chrX:32682977-32684438	ENSG00000233519.1,RP11-177F11.1.1,lncRNA,chr1:238630593-238631046	ENSG00000252466.1,MIR2115,miRNA,chr3:48332853-48332953	NA	0	0	0	0	0	0	0	0	0	0	0	0	0	0
ENSG00000213578.4,CPLX3,coding,chr15:72905940-72911194	ENSG00000105398.3,SULT2A1,coding,chr19:53065534-53081466	ENSG00000232464.1,CTA-125H2.1.1,lncRNA,chr22:24685039-24709492	NA	ENSG00000252466.1,MIR2115,miRNA,chr3:48332853-48332953	NA	0	0	0	0	0	0	0	0	0	0	0	0	0	0
ENSG00000213578.4,CPLX3,coding,chr15:72905940-72911194	NA	ENSG00000234116.1,RP11-261C10.1.1,lncRNA,chr1:241235769-241237393	ENSG00000250902.1,RP11-301H24.4.1,lncRNA,chr4:146655216-146657720	ENSG00000252466.1,MIR2115,miRNA,chr3:48332853-48332953	NA	0	0	0	0	0	0	0	0	0	0	0	0	0	0
ENSG00000213578.4,CPLX3,coding,chr15:72905940-72911194	NA	ENSG00000233519.1,RP11-177F11.1.1,lncRNA,chr1:238630593-238631046	ENSG00000250902.1,RP11-301H24.4.1,lncRNA,chr4:146655216-146657720	ENSG00000252466.1,MIR2115,miRNA,chr3:48332853-48332953	NA	0	0	0	0	0	0	0	0	0	0	0	0	0	0
ENSG00000213578.4,CPLX3,coding,chr15:72905940-72911194	NA	ENSG00000260457.1,RP11-723G8.1.1,lncRNA,chr18:67655254-67689010	ENSG00000232624.1,RP11-478H13.3.1,lncRNA,chr10:29135881-29137154	ENSG00000208017.1,MIR140,miRNA,chr16:68524484-68524584	NA	0	0	0	0	0	0	0	0	0	0	0	0	0	0
ENSG00000213578.4,CPLX3,coding,chr15:72905940-72911194	NA	ENSG00000260457.1,RP11-723G8.1.1,lncRNA,chr18:67655254-67689010	ENSG00000232464.1,CTA-125H2.1.1,lncRNA,chr22:24685039-24709492	ENSG00000208017.1,MIR140,miRNA,chr16:68524484-68524584	NA	0	0	0	0	0	0	0	0	0	0	0	0	0	0
ENSG00000213578.4,CPLX3,coding,chr15:72905940-72911194	NA	ENSG00000232624.1,RP11-478H13.3.1,lncRNA,chr10:29135881-29137154	ENSG00000230704.1,RP1-117P20.3.1,lncRNA,chr1:167998693-168000413	ENSG00000208017.1,MIR140,miRNA,chr16:68524484-68524584	NA	0	0	0	0	0	0	0	0	0	0	0	0	0	0
ENSG00000213578.4,CPLX3,coding,chr15:72905940-72911194	NA	ENSG00000230704.1,RP1-117P20.3.1,lncRNA,chr1:167998693-168000413	ENSG00000260741.1,CTC-391G2.1.1,lncRNA,chr16:23113699-23131926	ENSG00000208017.1,MIR140,miRNA,chr16:68524484-68524584	NA	0	0	0	0	0	0	0	0	0	0	0	0	0	0
ENSG00000213578.4,CPLX3,coding,chr15:72905940-72911194	NA	ENSG00000230704.1,RP1-117P20.3.1,lncRNA,chr1:167998693-168000413	ENSG00000232464.1,CTA-125H2.1.1,lncRNA,chr22:24685039-24709492	ENSG00000208017.1,MIR140,miRNA,chr16:68524484-68524584	NA	0	0	0	0	0	0	0	0	0	0	0	0	0	0
ENSG00000213578.4,CPLX3,coding,chr15:72905940-72911194	NA	ENSG00000232624.1,RP11-478H13.3.1,lncRNA,chr10:29135881-29137154	ENSG00000260741.1,CTC-391G2.1.1,lncRNA,chr16:23113699-23131926	ENSG00000208017.1,MIR140,miRNA,chr16:68524484-68524584	NA	0	0	0	0	0	0	0	0	0	0	0	0	0	0
ENSG00000213578.4,CPLX3,coding,chr15:72905940-72911194	NA	ENSG00000236176.1,LINC00353,lncRNA,chr13:88998945-89004059	ENSG00000232624.1,RP11-478H13.3.1,lncRNA,chr10:29135881-29137154	ENSG00000208017.1,MIR140,miRNA,chr16:68524484-68524584	NA	0	0	0	0	0	0	0	0	0	0	0	0	0	0
ENSG00000213578.4,CPLX3,coding,chr15:72905940-72911194	NA	ENSG00000226364.1,AC102948.2.1,lncRNA,chr17:48294479-48331947	ENSG00000232624.1,RP11-478H13.3.1,lncRNA,chr10:29135881-29137154	ENSG00000208017.1,MIR140,miRNA,chr16:68524484-68524584	NA	0	0	0	0	0	0	0	0	0	0	0	0	0	0
ENSG00000213578.4,CPLX3,coding,chr15:72905940-72911194	NA	ENSG00000232624.1,RP11-478H13.3.1,lncRNA,chr10:29135881-29137154	ENSG00000232464.1,CTA-125H2.1.1,lncRNA,chr22:24685039-24709492	ENSG00000208017.1,MIR140,miRNA,chr16:68524484-68524584	NA	0	0	0	0	0	0	0	0	0	0	0	0	0	0
ENSG00000213578.4,CPLX3,coding,chr15:72905940-72911194	NA	ENSG00000240777.2,RP11-58O15.1.1,lncRNA,chr3:55619670-55622172	ENSG00000232624.1,RP11-478H13.3.1,lncRNA,chr10:29135881-29137154	ENSG00000208017.1,MIR140,miRNA,chr16:68524484-68524584	NA	0	0	0	0	0	0	0	0	0	0	0	0	0	0
ENSG00000213578.4,CPLX3,coding,chr15:72905940-72911194	NA	ENSG00000232464.1,CTA-125H2.1.1,lncRNA,chr22:24685039-24709492	ENSG00000260741.1,CTC-391G2.1.1,lncRNA,chr16:23113699-23131926	ENSG00000208017.1,MIR140,miRNA,chr16:68524484-68524584	NA	0	0	0	0	0	0	0	0	0	0	0	0	0	0
ENSG00000213578.4,CPLX3,coding,chr15:72905940-72911194	NA	ENSG00000236176.1,LINC00353,lncRNA,chr13:88998945-89004059	ENSG00000226364.1,AC102948.2.1,lncRNA,chr17:48294479-48331947	ENSG00000208017.1,MIR140,miRNA,chr16:68524484-68524584	NA	0	0	0	0	0	0	0	0	0	0	0	0	0	0
ENSG00000206106.2,KRTAP22-2,coding,chr21:30884294-30884587	NA	ENSG00000230720.1,RP11-14C22.6.1,lncRNA,chr10:31052185-31052675	ENSG00000248799.1,CTC-548H10.2.1,lncRNA,chr5:127015283-127027620	ENSG00000199187.1,MIR365B,miRNA,chr17:26926542-26926653	NA	0	0	0	0	0	0	0	0	0	0	0	0	0	0
ENSG00000214819.1,CDRT15L2,coding,chr17:20423628-20424816	ENSG00000206106.2,KRTAP22-2,coding,chr21:30884294-30884587	ENSG00000230720.1,RP11-14C22.6.1,lncRNA,chr10:31052185-31052675	NA	ENSG00000199187.1,MIR365B,miRNA,chr17:26926542-26926653	NA	0	0	0	0	0	0	0	0	0	0	0	0	0	0
ENSG00000214819.1,CDRT15L2,coding,chr17:20423628-20424816	NA	ENSG00000230720.1,RP11-14C22.6.1,lncRNA,chr10:31052185-31052675	NA	ENSG00000199187.1,MIR365B,miRNA,chr17:26926542-26926653	ENSG00000207944.1,MIR574,miRNA,chr4:38546047-38546143	0	0	0	0	0	0	0	0	0	0	0	0	0	0
ENSG00000214819.1,CDRT15L2,coding,chr17:20423628-20424816	NA	ENSG00000224932.1,AC107399.2.1,lncRNA,chr4:118455200-118501243	ENSG00000230720.1,RP11-14C22.6.1,lncRNA,chr10:31052185-31052675	ENSG00000207944.1,MIR574,miRNA,chr4:38546047-38546143	NA	0	0	0	0	0	0	0	0	0	0	0	0	0	0
ENSG00000214819.1,CDRT15L2,coding,chr17:20423628-20424816	NA	ENSG00000232225.1,RP11-143O10.1.1,lncRNA,chr13:88665101-88687145	ENSG00000230720.1,RP11-14C22.6.1,lncRNA,chr10:31052185-31052675	ENSG00000207944.1,MIR574,miRNA,chr4:38546047-38546143	NA	0	0	0	0	0	0	0	0	0	0	0	0	0	0
ENSG00000214819.1,CDRT15L2,coding,chr17:20423628-20424816	ENSG00000259164.1,RP11-463C8.4.1,coding,chr14:76634406-76761558	ENSG00000230720.1,RP11-14C22.6.1,lncRNA,chr10:31052185-31052675	NA	ENSG00000207944.1,MIR574,miRNA,chr4:38546047-38546143	NA	0	0	0	0	0	0	0	0	0	0	0	0	0	0
ENSG00000259164.1,RP11-463C8.4.1,coding,chr14:76634406-76761558	NA	ENSG00000232225.1,RP11-143O10.1.1,lncRNA,chr13:88665101-88687145	ENSG00000230720.1,RP11-14C22.6.1,lncRNA,chr10:31052185-31052675	ENSG00000207944.1,MIR574,miRNA,chr4:38546047-38546143	NA	0	0	0	0	0	0	0	0	0	0	0	0	0	0
ENSG00000260548.1,RP6-24A23.6.1,coding,chrX:107851955-107862573	ENSG00000176495.2,OR5AN1,coding,chr11:58888460-58889497	ENSG00000229546.1,RP11-366O17.3.1,lncRNA,chr13:42314549-42315023	NA	ENSG00000207739.1,MIR218-2,miRNA,chr5:168127728-168127838	NA	0	0	0	0	0	0	0	0	0	0	0	0	0	0
ENSG00000260548.1,RP6-24A23.6.1,coding,chrX:107851955-107862573	NA	ENSG00000229546.1,RP11-366O17.3.1,lncRNA,chr13:42314549-42315023	ENSG00000237567.1,RP3-359N14.2.1,lncRNA,chr6:106167234-106186764	ENSG00000207739.1,MIR218-2,miRNA,chr5:168127728-168127838	NA	0	0	0	0	0	0	0	0	0	0	0	0	0	0
ENSG00000244624.2,KRTAP20-1,coding,chr21:30910620-30910874	NA	ENSG00000236828.1,DMD-AS3,lncRNA,chrX:32682977-32684438	ENSG00000257700.1,RP11-641A6.3.1,lncRNA,chr12:51372655-51376839	ENSG00000208033.1,MIR609,miRNA,chr10:105968536-105968631	NA	0	0	0	0	0	0	0	0	0	0	0	0	0	0
ENSG00000244624.2,KRTAP20-1,coding,chr21:30910620-30910874	NA	ENSG00000249747.1,RP11-308K2.1.1,lncRNA,chr4:188360133-188367494	ENSG00000257700.1,RP11-641A6.3.1,lncRNA,chr12:51372655-51376839	ENSG00000208033.1,MIR609,miRNA,chr10:105968536-105968631	NA	0	0	0	0	0	0	0	0	0	1	0	0	0	1
ENSG00000176742.1,OR51V1,coding,chr11:5177540-5178506	NA	ENSG00000234116.1,RP11-261C10.1.1,lncRNA,chr1:241235769-241237393	ENSG00000257700.1,RP11-641A6.3.1,lncRNA,chr12:51372655-51376839	ENSG00000221410.1,MIR1238,miRNA,chr19:10523797-10523880	NA	0	0	0	0	0	0	0	0	0	0	0	0	0	0
ENSG00000176742.1,OR51V1,coding,chr11:5177540-5178506	NA	ENSG00000233519.1,RP11-177F11.1.1,lncRNA,chr1:238630593-238631046	ENSG00000257700.1,RP11-641A6.3.1,lncRNA,chr12:51372655-51376839	ENSG00000221410.1,MIR1238,miRNA,chr19:10523797-10523880	NA	0	0	0	0	0	0	0	0	0	0	0	0	0	0
ENSG00000204703.3,OR2B3,coding,chr6:29161963-29163069	NA	ENSG00000249747.1,RP11-308K2.1.1,lncRNA,chr4:188360133-188367494	ENSG00000254861.1,RP11-945A11.2.1,lncRNA,chr11:23739451-23782720	ENSG00000207729.1,MIR556,miRNA,chr1:160578959-160579054	NA	0	0	0	0	0	0	0	0	0	1	1	0	0	2
ENSG00000204703.3,OR2B3,coding,chr6:29161963-29163069	NA	ENSG00000236267.1,AP006216.5.1,lncRNA,chr11:116189129-116189929	ENSG00000249747.1,RP11-308K2.1.1,lncRNA,chr4:188360133-188367494	ENSG00000207729.1,MIR556,miRNA,chr1:160578959-160579054	NA	0	0	0	0	0	0	0	0	0	0	1	0	0	1
ENSG00000244624.2,KRTAP20-1,coding,chr21:30910620-30910874	NA	ENSG00000236267.1,AP006216.5.1,lncRNA,chr11:116189129-116189929	ENSG00000234686.1,AC010971.1.1,lncRNA,chr7:49240278-49264958	ENSG00000207729.1,MIR556,miRNA,chr1:160578959-160579054	NA	0	0	0	0	0	0	0	0	0	0	0	0	0	0
ENSG00000244624.2,KRTAP20-1,coding,chr21:30910620-30910874	NA	ENSG00000236267.1,AP006216.5.1,lncRNA,chr11:116189129-116189929	ENSG00000231597.1,AC007557.4.1,lncRNA,chr2:217427356-217428100	ENSG00000207729.1,MIR556,miRNA,chr1:160578959-160579054	NA	0	0	0	0	0	0	0	0	0	0	0	0	0	0
ENSG00000244624.2,KRTAP20-1,coding,chr21:30910620-30910874	NA	ENSG00000236267.1,AP006216.5.1,lncRNA,chr11:116189129-116189929	ENSG00000236828.1,DMD-AS3,lncRNA,chrX:32682977-32684438	ENSG00000207729.1,MIR556,miRNA,chr1:160578959-160579054	NA	0	0	0	0	0	0	0	0	0	0	0	0	0	0
ENSG00000244624.2,KRTAP20-1,coding,chr21:30910620-30910874	NA	ENSG00000236267.1,AP006216.5.1,lncRNA,chr11:116189129-116189929	ENSG00000249747.1,RP11-308K2.1.1,lncRNA,chr4:188360133-188367494	ENSG00000207729.1,MIR556,miRNA,chr1:160578959-160579054	NA	0	0	0	0	0	0	0	0	0	0	1	0	0	1
ENSG00000183292.8,AC140481.2.1,coding,chr2:131044871-131058204	NA	ENSG00000256750.1,RP11-3L23.2.1,lncRNA,chr12:117680941-117683867	NA	ENSG00000207729.1,MIR556,miRNA,chr1:160578959-160579054	ENSG00000207983.1,MIR613,miRNA,chr12:12808849-12808944	0	0	0	0	0	0	0	0	0	0	0	0	0	0
ENSG00000204703.3,OR2B3,coding,chr6:29161963-29163069	NA	ENSG00000231140.1,RP11-347J14.7.1,lncRNA,chr9:39385733-39387403	ENSG00000236653.1,AC005235.1.1,lncRNA,chr2:198872331-198948066	ENSG00000207729.1,MIR556,miRNA,chr1:160578959-160579054	NA	0	0	0	0	0	0	0	0	0	0	0	0	0	0
ENSG00000204703.3,OR2B3,coding,chr6:29161963-29163069	NA	ENSG00000249747.1,RP11-308K2.1.1,lncRNA,chr4:188360133-188367494	ENSG00000231140.1,RP11-347J14.7.1,lncRNA,chr9:39385733-39387403	ENSG00000207729.1,MIR556,miRNA,chr1:160578959-160579054	NA	0	0	0	0	0	0	0	0	0	1	0	0	0	1
ENSG00000244624.2,KRTAP20-1,coding,chr21:30910620-30910874	NA	ENSG00000231140.1,RP11-347J14.7.1,lncRNA,chr9:39385733-39387403	ENSG00000234686.1,AC010971.1.1,lncRNA,chr7:49240278-49264958	ENSG00000207729.1,MIR556,miRNA,chr1:160578959-160579054	NA	0	0	0	0	0	0	0	0	0	0	0	0	0	0
ENSG00000244624.2,KRTAP20-1,coding,chr21:30910620-30910874	NA	ENSG00000231140.1,RP11-347J14.7.1,lncRNA,chr9:39385733-39387403	ENSG00000231597.1,AC007557.4.1,lncRNA,chr2:217427356-217428100	ENSG00000207729.1,MIR556,miRNA,chr1:160578959-160579054	NA	0	0	0	0	0	0	0	0	0	0	0	0	0	0
ENSG00000244624.2,KRTAP20-1,coding,chr21:30910620-30910874	NA	ENSG00000236828.1,DMD-AS3,lncRNA,chrX:32682977-32684438	ENSG00000231140.1,RP11-347J14.7.1,lncRNA,chr9:39385733-39387403	ENSG00000207729.1,MIR556,miRNA,chr1:160578959-160579054	NA	0	0	0	0	0	0	0	0	0	0	0	0	0	0
ENSG00000244624.2,KRTAP20-1,coding,chr21:30910620-30910874	NA	ENSG00000249747.1,RP11-308K2.1.1,lncRNA,chr4:188360133-188367494	ENSG00000231140.1,RP11-347J14.7.1,lncRNA,chr9:39385733-39387403	ENSG00000207729.1,MIR556,miRNA,chr1:160578959-160579054	NA	0	0	0	0	0	0	0	0	0	1	0	0	0	1
ENSG00000244624.2,KRTAP20-1,coding,chr21:30910620-30910874	NA	ENSG00000234686.1,AC010971.1.1,lncRNA,chr7:49240278-49264958	ENSG00000231597.1,AC007557.4.1,lncRNA,chr2:217427356-217428100	ENSG00000207729.1,MIR556,miRNA,chr1:160578959-160579054	NA	0	0	0	0	0	0	0	0	0	0	0	0	0	0
ENSG00000244624.2,KRTAP20-1,coding,chr21:30910620-30910874	NA	ENSG00000236828.1,DMD-AS3,lncRNA,chrX:32682977-32684438	ENSG00000234686.1,AC010971.1.1,lncRNA,chr7:49240278-49264958	ENSG00000207729.1,MIR556,miRNA,chr1:160578959-160579054	NA	0	0	0	0	0	0	0	0	0	0	0	0	0	0
ENSG00000204702.4,OR2J1,coding,chr6:29176364-29177637	NA	ENSG00000253643.1,RP11-561E1.1.1,lncRNA,chr8:24403714-24428232	ENSG00000249276.1,RP11-8L21.1.1,lncRNA,chr5:43910225-43922487	ENSG00000207755.1,MIR450A2,miRNA,chrX:133502203-133502303	NA	0	0	0	0	0	0	0	0	0	0	0	0	0	0
ENSG00000204702.4,OR2J1,coding,chr6:29176364-29177637	NA	ENSG00000253643.1,RP11-561E1.1.1,lncRNA,chr8:24403714-24428232	ENSG00000249276.1,RP11-8L21.1.1,lncRNA,chr5:43910225-43922487	ENSG00000207930.1,MIR603,miRNA,chr10:24604619-24604716	NA	0	0	0	0	0	0	0	0	0	0	0	0	0	0
ENSG00000204702.4,OR2J1,coding,chr6:29176364-29177637	NA	ENSG00000249547.1,RP11-453O5.1.1,lncRNA,chr4:22845345-22896294	ENSG00000249276.1,RP11-8L21.1.1,lncRNA,chr5:43910225-43922487	ENSG00000207755.1,MIR450A2,miRNA,chrX:133502203-133502303	NA	0	0	0	0	0	0	0	0	0	0	0	0	0	0
ENSG00000204702.4,OR2J1,coding,chr6:29176364-29177637	NA	ENSG00000230206.1,AC000364.1.1,lncRNA,chr7:126507982-126518208	ENSG00000223993.1,RP11-475D12.1.1,lncRNA,chr10:87181678-87182251	ENSG00000207755.1,MIR450A2,miRNA,chrX:133502203-133502303	NA	0	0	0	0	0	0	0	0	0	0	0	0	0	0
ENSG00000204702.4,OR2J1,coding,chr6:29176364-29177637	NA	ENSG00000230206.1,AC000364.1.1,lncRNA,chr7:126507982-126518208	ENSG00000257519.1,RP11-116D17.2.1,lncRNA,chr12:114185357-114192784	ENSG00000207755.1,MIR450A2,miRNA,chrX:133502203-133502303	NA	0	0	0	0	0	0	0	0	0	0	0	0	0	0
ENSG00000204702.4,OR2J1,coding,chr6:29176364-29177637	NA	ENSG00000230206.1,AC000364.1.1,lncRNA,chr7:126507982-126518208	ENSG00000251250.1,RP11-404K5.4.1,lncRNA,chr5:7379176-7379722	ENSG00000207755.1,MIR450A2,miRNA,chrX:133502203-133502303	NA	0	0	0	0	0	0	0	0	0	0	0	0	0	0
ENSG00000204702.4,OR2J1,coding,chr6:29176364-29177637	NA	ENSG00000249547.1,RP11-453O5.1.1,lncRNA,chr4:22845345-22896294	ENSG00000230206.1,AC000364.1.1,lncRNA,chr7:126507982-126518208	ENSG00000207755.1,MIR450A2,miRNA,chrX:133502203-133502303	NA	0	0	0	0	0	0	0	0	0	0	0	0	0	0
ENSG00000204702.4,OR2J1,coding,chr6:29176364-29177637	NA	ENSG00000249547.1,RP11-453O5.1.1,lncRNA,chr4:22845345-22896294	ENSG00000253643.1,RP11-561E1.1.1,lncRNA,chr8:24403714-24428232	ENSG00000207755.1,MIR450A2,miRNA,chrX:133502203-133502303	NA	0	0	0	0	0	0	0	0	0	0	0	0	0	0
ENSG00000204702.4,OR2J1,coding,chr6:29176364-29177637	NA	ENSG00000248942.1,CTD-2275D24.4.1,lncRNA,chr5:73637990-73639906	ENSG00000251250.1,RP11-404K5.4.1,lncRNA,chr5:7379176-7379722	ENSG00000207755.1,MIR450A2,miRNA,chrX:133502203-133502303	NA	0	0	0	0	0	0	0	0	0	0	0	0	0	0
ENSG00000259164.1,RP11-463C8.4.1,coding,chr14:76634406-76761558	NA	ENSG00000257470.1,RP11-397H6.1.1,lncRNA,chr12:95941929-95969038	ENSG00000254659.1,RP11-262A12.1.1,lncRNA,chr11:109127381-109199783	ENSG00000211578.1,MIR766,miRNA,chrX:118664728-118664839	NA	0	0	0	0	0	0	0	0	0	0	0	0	0	0
ENSG00000184724.4,KRTAP6-1,coding,chr21:30907620-30911767	NA	ENSG00000253403.1,RP11-348M17.2.1,lncRNA,chr5:161046930-161048992	NA	ENSG00000221464.1,MIR1271,miRNA,chr5:175727554-175727640	ENSG00000253030.1,MIR2116,miRNA,chr15:57250673-57250753	0	0	0	0	0	0	0	1	0	1	0	0	0	2
ENSG00000150261.2,OR8K1,coding,chr11:55869996-55871083	NA	ENSG00000234686.1,AC010971.1.1,lncRNA,chr7:49240278-49264958	NA	ENSG00000221464.1,MIR1271,miRNA,chr5:175727554-175727640	ENSG00000253030.1,MIR2116,miRNA,chr15:57250673-57250753	0	0	0	0	0	0	0	0	0	0	0	0	0	0
ENSG00000150261.2,OR8K1,coding,chr11:55869996-55871083	NA	ENSG00000231597.1,AC007557.4.1,lncRNA,chr2:217427356-217428100	NA	ENSG00000221464.1,MIR1271,miRNA,chr5:175727554-175727640	ENSG00000253030.1,MIR2116,miRNA,chr15:57250673-57250753	0	0	0	0	0	0	0	0	0	0	0	0	0	0
ENSG00000150261.2,OR8K1,coding,chr11:55869996-55871083	NA	ENSG00000236828.1,DMD-AS3,lncRNA,chrX:32682977-32684438	NA	ENSG00000221464.1,MIR1271,miRNA,chr5:175727554-175727640	ENSG00000253030.1,MIR2116,miRNA,chr15:57250673-57250753	0	0	0	0	0	0	0	0	0	0	0	0	0	0
ENSG00000150261.2,OR8K1,coding,chr11:55869996-55871083	NA	ENSG00000234116.1,RP11-261C10.1.1,lncRNA,chr1:241235769-241237393	NA	ENSG00000221464.1,MIR1271,miRNA,chr5:175727554-175727640	ENSG00000253030.1,MIR2116,miRNA,chr15:57250673-57250753	0	0	0	0	0	0	0	0	0	0	0	0	0	0
ENSG00000150261.2,OR8K1,coding,chr11:55869996-55871083	NA	ENSG00000233519.1,RP11-177F11.1.1,lncRNA,chr1:238630593-238631046	NA	ENSG00000221464.1,MIR1271,miRNA,chr5:175727554-175727640	ENSG00000253030.1,MIR2116,miRNA,chr15:57250673-57250753	0	0	0	0	0	0	0	0	0	0	0	0	0	0
ENSG00000256671.3,LIMS3L,coding,chr2:110641954-110665048	ENSG00000254466.1,OR4D10,coding,chr11:59001421-59002445	ENSG00000224122.1,POU6F2-AS1,lncRNA,chr7:39410721-39412470	NA	ENSG00000253030.1,MIR2116,miRNA,chr15:57250673-57250753	NA	0	0	0	0	0	0	0	0	0	0	0	0	0	0
ENSG00000184724.4,KRTAP6-1,coding,chr21:30907620-30911767	NA	ENSG00000253403.1,RP11-348M17.2.1,lncRNA,chr5:161046930-161048992	NA	ENSG00000207989.1,MIR493,miRNA,chr14:100405149-100405238	ENSG00000253030.1,MIR2116,miRNA,chr15:57250673-57250753	0	0	0	0	0	0	0	1	0	1	0	0	0	2
ENSG00000177151.3,OR2T35,coding,chr1:246868210-246869182	ENSG00000184724.4,KRTAP6-1,coding,chr21:30907620-30911767	ENSG00000226861.1,RP5-1119O21.2.1,lncRNA,chr10:8380865-8383636	NA	ENSG00000253030.1,MIR2116,miRNA,chr15:57250673-57250753	NA	0	0	0	0	0	0	0	0	1	0	0	0	0	1
ENSG00000244624.2,KRTAP20-1,coding,chr21:30910620-30910874	ENSG00000184724.4,KRTAP6-1,coding,chr21:30907620-30911767	ENSG00000224122.1,POU6F2-AS1,lncRNA,chr7:39410721-39412470	NA	ENSG00000253030.1,MIR2116,miRNA,chr15:57250673-57250753	NA	0	0	0	0	0	0	0	0	1	0	0	0	0	1
ENSG00000150261.2,OR8K1,coding,chr11:55869996-55871083	NA	ENSG00000234686.1,AC010971.1.1,lncRNA,chr7:49240278-49264958	ENSG00000231597.1,AC007557.4.1,lncRNA,chr2:217427356-217428100	ENSG00000253030.1,MIR2116,miRNA,chr15:57250673-57250753	NA	0	0	0	0	0	0	0	0	0	0	0	0	0	0
ENSG00000244624.2,KRTAP20-1,coding,chr21:30910620-30910874	NA	ENSG00000234686.1,AC010971.1.1,lncRNA,chr7:49240278-49264958	ENSG00000231597.1,AC007557.4.1,lncRNA,chr2:217427356-217428100	ENSG00000253030.1,MIR2116,miRNA,chr15:57250673-57250753	NA	0	0	0	0	0	0	0	0	0	0	0	0	0	0
ENSG00000150261.2,OR8K1,coding,chr11:55869996-55871083	NA	ENSG00000236828.1,DMD-AS3,lncRNA,chrX:32682977-32684438	ENSG00000234686.1,AC010971.1.1,lncRNA,chr7:49240278-49264958	ENSG00000253030.1,MIR2116,miRNA,chr15:57250673-57250753	NA	0	0	0	0	0	0	0	0	0	0	0	0	0	0
ENSG00000244624.2,KRTAP20-1,coding,chr21:30910620-30910874	NA	ENSG00000236828.1,DMD-AS3,lncRNA,chrX:32682977-32684438	ENSG00000234686.1,AC010971.1.1,lncRNA,chr7:49240278-49264958	ENSG00000253030.1,MIR2116,miRNA,chr15:57250673-57250753	NA	0	0	0	0	0	0	0	0	0	0	0	0	0	0
ENSG00000150261.2,OR8K1,coding,chr11:55869996-55871083	NA	ENSG00000233519.1,RP11-177F11.1.1,lncRNA,chr1:238630593-238631046	ENSG00000234686.1,AC010971.1.1,lncRNA,chr7:49240278-49264958	ENSG00000253030.1,MIR2116,miRNA,chr15:57250673-57250753	NA	0	0	0	0	0	0	0	0	0	0	0	0	0	0
ENSG00000150261.2,OR8K1,coding,chr11:55869996-55871083	NA	ENSG00000233519.1,RP11-177F11.1.1,lncRNA,chr1:238630593-238631046	ENSG00000231597.1,AC007557.4.1,lncRNA,chr2:217427356-217428100	ENSG00000253030.1,MIR2116,miRNA,chr15:57250673-57250753	NA	0	0	0	0	0	0	0	0	0	0	0	0	0	0
ENSG00000150261.2,OR8K1,coding,chr11:55869996-55871083	NA	ENSG00000233519.1,RP11-177F11.1.1,lncRNA,chr1:238630593-238631046	ENSG00000236653.1,AC005235.1.1,lncRNA,chr2:198872331-198948066	ENSG00000253030.1,MIR2116,miRNA,chr15:57250673-57250753	NA	0	0	0	0	0	0	0	0	0	0	0	0	0	0
ENSG00000150261.2,OR8K1,coding,chr11:55869996-55871083	NA	ENSG00000236828.1,DMD-AS3,lncRNA,chrX:32682977-32684438	ENSG00000233519.1,RP11-177F11.1.1,lncRNA,chr1:238630593-238631046	ENSG00000253030.1,MIR2116,miRNA,chr15:57250673-57250753	NA	0	0	0	0	0	0	0	0	0	0	0	0	0	0
ENSG00000204848.4,FAM75A2,coding,chr9:39874974-39881210	ENSG00000147926.9,FAM75A3,coding,chr9:40690290-40696537	ENSG00000258280.1,RP11-1028N23.2.1,lncRNA,chr12:114498863-114499803	NA	ENSG00000215930.1,MIR942,miRNA,chr1:117438787-117438873	NA	0	0	0	0	0	0	0	0	0	0	0	0	0	0
ENSG00000244624.2,KRTAP20-1,coding,chr21:30910620-30910874	NA	ENSG00000236828.1,DMD-AS3,lncRNA,chrX:32682977-32684438	ENSG00000260699.1,RP11-461O7.2.1,lncRNA,chr16:54700392-54701383	ENSG00000215930.1,MIR942,miRNA,chr1:117438787-117438873	NA	0	0	0	0	0	0	0	0	0	0	0	0	0	0
ENSG00000244624.2,KRTAP20-1,coding,chr21:30910620-30910874	NA	ENSG00000234686.1,AC010971.1.1,lncRNA,chr7:49240278-49264958	ENSG00000231597.1,AC007557.4.1,lncRNA,chr2:217427356-217428100	ENSG00000215930.1,MIR942,miRNA,chr1:117438787-117438873	NA	0	0	0	0	0	0	0	0	0	0	0	0	0	0
ENSG00000244624.2,KRTAP20-1,coding,chr21:30910620-30910874	NA	ENSG00000236828.1,DMD-AS3,lncRNA,chrX:32682977-32684438	ENSG00000234686.1,AC010971.1.1,lncRNA,chr7:49240278-49264958	ENSG00000215930.1,MIR942,miRNA,chr1:117438787-117438873	NA	0	0	0	0	0	0	0	0	0	0	0	0	0	0
ENSG00000188069.3,OR51F1,coding,chr11:4746784-4747744	NA	ENSG00000253613.1,CTC-551A13.2.1,lncRNA,chr5:110439794-110455712	ENSG00000248223.1,CTD-2139B15.2.1,lncRNA,chr5:17407018-17408008	ENSG00000251856.1,MIR449C,miRNA,chr5:54503846-54503938	NA	0	0	0	0	0	0	0	1	0	0	0	0	0	1
ENSG00000259164.1,RP11-463C8.4.1,coding,chr14:76634406-76761558	NA	ENSG00000253613.1,CTC-551A13.2.1,lncRNA,chr5:110439794-110455712	ENSG00000248223.1,CTD-2139B15.2.1,lncRNA,chr5:17407018-17408008	ENSG00000251856.1,MIR449C,miRNA,chr5:54503846-54503938	NA	0	0	0	0	0	0	0	0	0	0	0	0	0	0
ENSG00000259164.1,RP11-463C8.4.1,coding,chr14:76634406-76761558	NA	ENSG00000253613.1,CTC-551A13.2.1,lncRNA,chr5:110439794-110455712	ENSG00000257523.1,CTD-2384A14.2.1,lncRNA,chr14:28514792-28517881	ENSG00000251856.1,MIR449C,miRNA,chr5:54503846-54503938	NA	0	0	0	0	0	0	0	0	0	0	1	0	0	1
ENSG00000259164.1,RP11-463C8.4.1,coding,chr14:76634406-76761558	NA	ENSG00000258747.1,RP11-163M18.1.1,lncRNA,chr14:44046359-44077466	ENSG00000253613.1,CTC-551A13.2.1,lncRNA,chr5:110439794-110455712	ENSG00000251856.1,MIR449C,miRNA,chr5:54503846-54503938	NA	0	0	0	0	0	0	0	0	0	0	0	0	0	0
ENSG00000175619.2,OR4B1,coding,chr11:48194919-48195890	NA	ENSG00000229540.1,RP11-625P7.1.1,lncRNA,chr6:4171933-4172504	ENSG00000223487.1,FRMPD4-AS1,lncRNA,chrX:12301206-12303173	ENSG00000221264.1,MIR1284,miRNA,chr3:71673810-71673930	NA	0	0	0	0	0	0	0	0	0	0	0	0	0	0
ENSG00000172208.3,OR4X2,coding,chr11:48223183-48224198	ENSG00000175619.2,OR4B1,coding,chr11:48194919-48195890	ENSG00000229540.1,RP11-625P7.1.1,lncRNA,chr6:4171933-4172504	NA	ENSG00000221264.1,MIR1284,miRNA,chr3:71673810-71673930	NA	0	0	0	0	0	0	0	0	0	0	0	0	0	0
ENSG00000204887.3,KRTAP1-4,coding,chr17:36439454-36439903	NA	ENSG00000229540.1,RP11-625P7.1.1,lncRNA,chr6:4171933-4172504	ENSG00000259127.1,RP11-242B12.5.1,lncRNA,chr10:103963709-104006864	ENSG00000221264.1,MIR1284,miRNA,chr3:71673810-71673930	NA	0	0	0	0	0	0	0	0	0	0	0	0	0	0
ENSG00000244624.2,KRTAP20-1,coding,chr21:30910620-30910874	NA	ENSG00000259827.1,RP11-343H19.2.1,lncRNA,chr16:55273882-55279220	ENSG00000229540.1,RP11-625P7.1.1,lncRNA,chr6:4171933-4172504	ENSG00000221264.1,MIR1284,miRNA,chr3:71673810-71673930	NA	0	0	0	0	0	0	0	0	0	0	0	0	0	0
ENSG00000204887.3,KRTAP1-4,coding,chr17:36439454-36439903	NA	ENSG00000250488.1,RP11-6C14.1.1,lncRNA,chr4:160807104-160918386	ENSG00000259127.1,RP11-242B12.5.1,lncRNA,chr10:103963709-104006864	ENSG00000221264.1,MIR1284,miRNA,chr3:71673810-71673930	NA	0	0	0	0	0	0	0	0	0	0	0	0	0	0
ENSG00000186146.1,DEFB131,coding,chr4:9055357-9061338	NA	ENSG00000231200.1,AC068490.2.1,lncRNA,chr2:22009712-22607482	NA	ENSG00000208033.1,MIR609,miRNA,chr10:105968536-105968631	ENSG00000251856.1,MIR449C,miRNA,chr5:54503846-54503938	0	0	0	0	0	0	0	0	0	0	0	0	0	0
ENSG00000186146.1,DEFB131,coding,chr4:9055357-9061338	NA	ENSG00000231200.1,AC068490.2.1,lncRNA,chr2:22009712-22607482	NA	ENSG00000208033.1,MIR609,miRNA,chr10:105968536-105968631	ENSG00000207613.1,MIR181C,miRNA,chr19:13846512-13846622	0	0	0	0	0	0	0	0	0	0	0	0	0	0
ENSG00000177151.3,OR2T35,coding,chr1:246868210-246869182	ENSG00000186146.1,DEFB131,coding,chr4:9055357-9061338	ENSG00000231200.1,AC068490.2.1,lncRNA,chr2:22009712-22607482	NA	ENSG00000251856.1,MIR449C,miRNA,chr5:54503846-54503938	NA	0	0	0	0	0	0	0	0	0	0	0	0	0	0
ENSG00000177151.3,OR2T35,coding,chr1:246868210-246869182	NA	ENSG00000250831.1,CTD-2232E5.2.1,lncRNA,chr5:88798109-88801612	ENSG00000231200.1,AC068490.2.1,lncRNA,chr2:22009712-22607482	ENSG00000251856.1,MIR449C,miRNA,chr5:54503846-54503938	NA	0	0	0	0	0	0	0	0	0	0	0	0	0	0
ENSG00000259164.1,RP11-463C8.4.1,coding,chr14:76634406-76761558	NA	ENSG00000229389.1,CTD-2022H16.1.1,lncRNA,chr15:28132436-28152559	ENSG00000231200.1,AC068490.2.1,lncRNA,chr2:22009712-22607482	ENSG00000251856.1,MIR449C,miRNA,chr5:54503846-54503938	NA	0	0	0	0	0	0	0	0	0	0	0	0	0	0
ENSG00000186146.1,DEFB131,coding,chr4:9055357-9061338	NA	ENSG00000231200.1,AC068490.2.1,lncRNA,chr2:22009712-22607482	NA	ENSG00000251856.1,MIR449C,miRNA,chr5:54503846-54503938	ENSG00000207613.1,MIR181C,miRNA,chr19:13846512-13846622	0	0	0	0	0	0	0	0	0	0	0	0	0	0
ENSG00000259164.1,RP11-463C8.4.1,coding,chr14:76634406-76761558	NA	ENSG00000231200.1,AC068490.2.1,lncRNA,chr2:22009712-22607482	NA	ENSG00000251856.1,MIR449C,miRNA,chr5:54503846-54503938	ENSG00000207613.1,MIR181C,miRNA,chr19:13846512-13846622	0	0	0	0	0	0	0	0	0	0	0	0	0	0
ENSG00000176922.2,OR51S1,coding,chr11:4826002-4827090	NA	ENSG00000231200.1,AC068490.2.1,lncRNA,chr2:22009712-22607482	ENSG00000224027.1,RP1-231P7P.1.1,lncRNA,chr22:26289799-26299534	ENSG00000251856.1,MIR449C,miRNA,chr5:54503846-54503938	NA	0	0	0	0	0	0	0	1	0	0	1	0	0	2
ENSG00000259164.1,RP11-463C8.4.1,coding,chr14:76634406-76761558	NA	ENSG00000258747.1,RP11-163M18.1.1,lncRNA,chr14:44046359-44077466	ENSG00000231200.1,AC068490.2.1,lncRNA,chr2:22009712-22607482	ENSG00000251856.1,MIR449C,miRNA,chr5:54503846-54503938	NA	0	0	0	0	0	0	0	0	0	0	0	0	0	0
ENSG00000259164.1,RP11-463C8.4.1,coding,chr14:76634406-76761558	NA	ENSG00000258747.1,RP11-163M18.1.1,lncRNA,chr14:44046359-44077466	ENSG00000231200.1,AC068490.2.1,lncRNA,chr2:22009712-22607482	ENSG00000207613.1,MIR181C,miRNA,chr19:13846512-13846622	NA	0	0	0	0	0	0	0	0	0	0	0	0	0	0
ENSG00000215547.1,DEFB115,coding,chr20:29309127-29311096	NA	ENSG00000231791.1,RP11-382D12.1.1,lncRNA,chr1:182564827-182568583	ENSG00000237468.1,RP11-715G15.1.1,lncRNA,chr6:146958786-146961760	ENSG00000207583.1,MIR606,miRNA,chr10:76982221-76982317	NA	0	0	0	0	0	0	0	0	0	0	0	0	0	0
ENSG00000184724.4,KRTAP6-1,coding,chr21:30907620-30911767	NA	ENSG00000232954.1,RP11-538C21.1.1,lncRNA,chr13:57683825-57705252	NA	ENSG00000221464.1,MIR1271,miRNA,chr5:175727554-175727640	ENSG00000207988.1,MIR576,miRNA,chr4:110629302-110629400	0	0	0	0	0	0	0	1	0	0	0	0	0	1
ENSG00000177151.3,OR2T35,coding,chr1:246868210-246869182	ENSG00000184724.4,KRTAP6-1,coding,chr21:30907620-30911767	ENSG00000232954.1,RP11-538C21.1.1,lncRNA,chr13:57683825-57705252	NA	ENSG00000221464.1,MIR1271,miRNA,chr5:175727554-175727640	NA	0	0	0	0	0	0	0	0	1	0	0	0	0	1
ENSG00000177151.3,OR2T35,coding,chr1:246868210-246869182	NA	ENSG00000232954.1,RP11-538C21.1.1,lncRNA,chr13:57683825-57705252	NA	ENSG00000221464.1,MIR1271,miRNA,chr5:175727554-175727640	ENSG00000207989.1,MIR493,miRNA,chr14:100405149-100405238	0	0	0	0	0	0	0	0	0	0	0	0	0	0
ENSG00000184724.4,KRTAP6-1,coding,chr21:30907620-30911767	NA	ENSG00000232954.1,RP11-538C21.1.1,lncRNA,chr13:57683825-57705252	NA	ENSG00000221464.1,MIR1271,miRNA,chr5:175727554-175727640	ENSG00000207989.1,MIR493,miRNA,chr14:100405149-100405238	0	0	0	0	0	0	0	1	0	0	0	0	0	1
ENSG00000215547.1,DEFB115,coding,chr20:29309127-29311096	NA	ENSG00000232954.1,RP11-538C21.1.1,lncRNA,chr13:57683825-57705252	NA	ENSG00000221464.1,MIR1271,miRNA,chr5:175727554-175727640	ENSG00000207989.1,MIR493,miRNA,chr14:100405149-100405238	0	0	0	0	0	0	0	0	0	0	0	0	0	0
ENSG00000177151.3,OR2T35,coding,chr1:246868210-246869182	ENSG00000184724.4,KRTAP6-1,coding,chr21:30907620-30911767	ENSG00000232954.1,RP11-538C21.1.1,lncRNA,chr13:57683825-57705252	NA	ENSG00000207989.1,MIR493,miRNA,chr14:100405149-100405238	NA	0	0	0	0	0	0	0	0	1	0	0	0	0	1
ENSG00000172154.3,OR8I2,coding,chr11:55617328-55618338	NA	ENSG00000231791.1,RP11-382D12.1.1,lncRNA,chr1:182564827-182568583	ENSG00000232954.1,RP11-538C21.1.1,lncRNA,chr13:57683825-57705252	ENSG00000207583.1,MIR606,miRNA,chr10:76982221-76982317	NA	0	0	0	0	0	0	0	0	0	0	0	0	0	0
ENSG00000215547.1,DEFB115,coding,chr20:29309127-29311096	NA	ENSG00000231791.1,RP11-382D12.1.1,lncRNA,chr1:182564827-182568583	ENSG00000232954.1,RP11-538C21.1.1,lncRNA,chr13:57683825-57705252	ENSG00000207583.1,MIR606,miRNA,chr10:76982221-76982317	NA	0	0	0	0	0	0	0	0	0	0	0	0	0	0
ENSG00000197428.2,OR51D1,coding,chr11:4617520-4618644	NA	ENSG00000231791.1,RP11-382D12.1.1,lncRNA,chr1:182564827-182568583	ENSG00000232954.1,RP11-538C21.1.1,lncRNA,chr13:57683825-57705252	ENSG00000207583.1,MIR606,miRNA,chr10:76982221-76982317	NA	0	0	0	0	0	0	0	0	0	0	0	0	0	0
ENSG00000215547.1,DEFB115,coding,chr20:29309127-29311096	ENSG00000197428.2,OR51D1,coding,chr11:4617520-4618644	ENSG00000232954.1,RP11-538C21.1.1,lncRNA,chr13:57683825-57705252	NA	ENSG00000207583.1,MIR606,miRNA,chr10:76982221-76982317	NA	0	0	0	0	0	0	0	0	0	0	0	0	0	0
ENSG00000203852.3,HIST2H3A,coding,chr1:148090804-148092460	NA	ENSG00000232806.1,AP001610.9.1,lncRNA,chr21:41852921-41856755	ENSG00000233519.1,RP11-177F11.1.1,lncRNA,chr1:238630593-238631046	ENSG00000221410.1,MIR1238,miRNA,chr19:10523797-10523880	NA	0	0	0	0	0	0	0	0	0	0	0	0	0	0
ENSG00000259164.1,RP11-463C8.4.1,coding,chr14:76634406-76761558	ENSG00000181464.2,AC005838.1,coding,chr17:15409521-15410315	ENSG00000258747.1,RP11-163M18.1.1,lncRNA,chr14:44046359-44077466	NA	ENSG00000212044.1,MIR548U,miRNA,chr1:147589954-147590046	NA	0	0	0	0	0	0	0	0	0	0	0	0	0	0
ENSG00000259164.1,RP11-463C8.4.1,coding,chr14:76634406-76761558	NA	ENSG00000249405.1,RP11-317O24.1.1,lncRNA,chr5:50190350-50191611	NA	ENSG00000208018.1,MIR645,miRNA,chr20:48635729-48635823	ENSG00000211578.1,MIR766,miRNA,chrX:118664728-118664839	0	0	0	0	0	0	0	0	0	1	0	0	0	1
ENSG00000259164.1,RP11-463C8.4.1,coding,chr14:76634406-76761558	NA	ENSG00000232597.1,AC013727.1.1,lncRNA,chr2:103839859-103863099	ENSG00000249405.1,RP11-317O24.1.1,lncRNA,chr5:50190350-50191611	ENSG00000208018.1,MIR645,miRNA,chr20:48635729-48635823	NA	0	0	0	0	0	0	0	0	0	0	1	0	0	1
ENSG00000259164.1,RP11-463C8.4.1,coding,chr14:76634406-76761558	NA	ENSG00000257470.1,RP11-397H6.1.1,lncRNA,chr12:95941929-95969038	ENSG00000249405.1,RP11-317O24.1.1,lncRNA,chr5:50190350-50191611	ENSG00000208018.1,MIR645,miRNA,chr20:48635729-48635823	NA	0	0	0	0	0	0	0	0	0	0	1	0	0	1
ENSG00000259164.1,RP11-463C8.4.1,coding,chr14:76634406-76761558	NA	ENSG00000258747.1,RP11-163M18.1.1,lncRNA,chr14:44046359-44077466	ENSG00000249405.1,RP11-317O24.1.1,lncRNA,chr5:50190350-50191611	ENSG00000208018.1,MIR645,miRNA,chr20:48635729-48635823	NA	0	0	0	0	0	0	0	0	0	0	1	0	0	1
ENSG00000261717.1,RP11-77K12.1.1,coding,chr16:74004082-74056105	ENSG00000181803.3,OR6S1,coding,chr14:20178694-20179690	ENSG00000232597.1,AC013727.1.1,lncRNA,chr2:103839859-103863099	NA	ENSG00000208018.1,MIR645,miRNA,chr20:48635729-48635823	NA	0	0	0	0	0	0	0	0	0	0	0	0	0	0
ENSG00000261717.1,RP11-77K12.1.1,coding,chr16:74004082-74056105	NA	ENSG00000232597.1,AC013727.1.1,lncRNA,chr2:103839859-103863099	NA	ENSG00000208018.1,MIR645,miRNA,chr20:48635729-48635823	ENSG00000211578.1,MIR766,miRNA,chrX:118664728-118664839	0	0	0	0	0	0	0	0	0	0	0	0	0	0
ENSG00000261717.1,RP11-77K12.1.1,coding,chr16:74004082-74056105	NA	ENSG00000257470.1,RP11-397H6.1.1,lncRNA,chr12:95941929-95969038	NA	ENSG00000208018.1,MIR645,miRNA,chr20:48635729-48635823	ENSG00000211578.1,MIR766,miRNA,chrX:118664728-118664839	0	0	0	0	0	0	0	0	0	0	0	0	0	0
ENSG00000261717.1,RP11-77K12.1.1,coding,chr16:74004082-74056105	NA	ENSG00000232597.1,AC013727.1.1,lncRNA,chr2:103839859-103863099	ENSG00000254178.1,RP11-299D14.2.1,lncRNA,chr8:25747561-25753568	ENSG00000208018.1,MIR645,miRNA,chr20:48635729-48635823	NA	0	0	0	0	0	0	0	0	0	0	0	0	0	0
ENSG00000261717.1,RP11-77K12.1.1,coding,chr16:74004082-74056105	NA	ENSG00000257470.1,RP11-397H6.1.1,lncRNA,chr12:95941929-95969038	ENSG00000232597.1,AC013727.1.1,lncRNA,chr2:103839859-103863099	ENSG00000208018.1,MIR645,miRNA,chr20:48635729-48635823	NA	0	0	0	0	0	0	0	0	0	0	0	0	0	0
ENSG00000261717.1,RP11-77K12.1.1,coding,chr16:74004082-74056105	NA	ENSG00000232597.1,AC013727.1.1,lncRNA,chr2:103839859-103863099	ENSG00000232964.1,RP11-543E8.1.1,lncRNA,chr1:228795028-228797952	ENSG00000208018.1,MIR645,miRNA,chr20:48635729-48635823	NA	0	0	0	0	0	0	0	0	0	0	0	0	0	0
ENSG00000261717.1,RP11-77K12.1.1,coding,chr16:74004082-74056105	ENSG00000204823.3,AC008676.1,coding,chr5:156735326-156744525	ENSG00000232597.1,AC013727.1.1,lncRNA,chr2:103839859-103863099	NA	ENSG00000208018.1,MIR645,miRNA,chr20:48635729-48635823	NA	0	0	0	0	0	0	0	0	0	0	0	0	0	0
ENSG00000261717.1,RP11-77K12.1.1,coding,chr16:74004082-74056105	NA	ENSG00000258747.1,RP11-163M18.1.1,lncRNA,chr14:44046359-44077466	ENSG00000232597.1,AC013727.1.1,lncRNA,chr2:103839859-103863099	ENSG00000208018.1,MIR645,miRNA,chr20:48635729-48635823	NA	0	0	0	0	0	0	0	0	0	0	0	0	0	0
ENSG00000261717.1,RP11-77K12.1.1,coding,chr16:74004082-74056105	NA	ENSG00000232597.1,AC013727.1.1,lncRNA,chr2:103839859-103863099	ENSG00000254782.1,ABHD14A-ACY1,lncRNA,chr3:51970267-51983087	ENSG00000208018.1,MIR645,miRNA,chr20:48635729-48635823	NA	0	0	0	0	0	0	0	0	0	0	0	0	0	0
ENSG00000259164.1,RP11-463C8.4.1,coding,chr14:76634406-76761558	ENSG00000261717.1,RP11-77K12.1.1,coding,chr16:74004082-74056105	ENSG00000232597.1,AC013727.1.1,lncRNA,chr2:103839859-103863099	NA	ENSG00000208018.1,MIR645,miRNA,chr20:48635729-48635823	NA	0	0	0	0	0	0	0	0	0	0	0	0	0	0
ENSG00000261717.1,RP11-77K12.1.1,coding,chr16:74004082-74056105	NA	ENSG00000258747.1,RP11-163M18.1.1,lncRNA,chr14:44046359-44077466	ENSG00000257470.1,RP11-397H6.1.1,lncRNA,chr12:95941929-95969038	ENSG00000208018.1,MIR645,miRNA,chr20:48635729-48635823	NA	0	0	0	0	0	0	0	0	0	0	0	0	0	0
ENSG00000259164.1,RP11-463C8.4.1,coding,chr14:76634406-76761558	ENSG00000261717.1,RP11-77K12.1.1,coding,chr16:74004082-74056105	ENSG00000257470.1,RP11-397H6.1.1,lncRNA,chr12:95941929-95969038	NA	ENSG00000208018.1,MIR645,miRNA,chr20:48635729-48635823	NA	0	0	0	0	0	0	0	0	0	0	0	0	0	0
ENSG00000259164.1,RP11-463C8.4.1,coding,chr14:76634406-76761558	ENSG00000261717.1,RP11-77K12.1.1,coding,chr16:74004082-74056105	ENSG00000258747.1,RP11-163M18.1.1,lncRNA,chr14:44046359-44077466	NA	ENSG00000208018.1,MIR645,miRNA,chr20:48635729-48635823	NA	0	0	0	0	0	0	0	0	0	0	0	0	0	0
ENSG00000259164.1,RP11-463C8.4.1,coding,chr14:76634406-76761558	NA	ENSG00000232597.1,AC013727.1.1,lncRNA,chr2:103839859-103863099	NA	ENSG00000208018.1,MIR645,miRNA,chr20:48635729-48635823	ENSG00000199072.1,MIRLET7F1,miRNA,chr9:95978449-95978536	0	0	0	0	0	0	0	0	0	0	0	0	1	1
ENSG00000259164.1,RP11-463C8.4.1,coding,chr14:76634406-76761558	NA	ENSG00000257470.1,RP11-397H6.1.1,lncRNA,chr12:95941929-95969038	NA	ENSG00000208018.1,MIR645,miRNA,chr20:48635729-48635823	ENSG00000199072.1,MIRLET7F1,miRNA,chr9:95978449-95978536	0	0	0	0	0	0	0	0	0	0	0	0	1	1
ENSG00000259164.1,RP11-463C8.4.1,coding,chr14:76634406-76761558	NA	ENSG00000258747.1,RP11-163M18.1.1,lncRNA,chr14:44046359-44077466	NA	ENSG00000208018.1,MIR645,miRNA,chr20:48635729-48635823	ENSG00000199072.1,MIRLET7F1,miRNA,chr9:95978449-95978536	0	0	0	0	0	0	0	0	0	0	0	0	1	1
ENSG00000259164.1,RP11-463C8.4.1,coding,chr14:76634406-76761558	NA	ENSG00000242816.1,RP11-768G7.3.1,lncRNA,chr3:118992209-118995302	ENSG00000232597.1,AC013727.1.1,lncRNA,chr2:103839859-103863099	ENSG00000208018.1,MIR645,miRNA,chr20:48635729-48635823	NA	0	0	0	0	0	0	0	0	0	0	0	0	0	0
ENSG00000259164.1,RP11-463C8.4.1,coding,chr14:76634406-76761558	NA	ENSG00000257470.1,RP11-397H6.1.1,lncRNA,chr12:95941929-95969038	ENSG00000242816.1,RP11-768G7.3.1,lncRNA,chr3:118992209-118995302	ENSG00000208018.1,MIR645,miRNA,chr20:48635729-48635823	NA	0	0	0	0	0	0	0	0	0	0	0	0	0	0
ENSG00000259164.1,RP11-463C8.4.1,coding,chr14:76634406-76761558	NA	ENSG00000258747.1,RP11-163M18.1.1,lncRNA,chr14:44046359-44077466	ENSG00000242816.1,RP11-768G7.3.1,lncRNA,chr3:118992209-118995302	ENSG00000208018.1,MIR645,miRNA,chr20:48635729-48635823	NA	0	0	0	0	0	0	0	0	0	0	0	0	0	0
ENSG00000204823.3,AC008676.1,coding,chr5:156735326-156744525	NA	ENSG00000232597.1,AC013727.1.1,lncRNA,chr2:103839859-103863099	NA	ENSG00000208018.1,MIR645,miRNA,chr20:48635729-48635823	ENSG00000211578.1,MIR766,miRNA,chrX:118664728-118664839	0	0	0	0	0	0	0	0	0	0	0	0	0	0
ENSG00000259164.1,RP11-463C8.4.1,coding,chr14:76634406-76761558	NA	ENSG00000232597.1,AC013727.1.1,lncRNA,chr2:103839859-103863099	NA	ENSG00000208018.1,MIR645,miRNA,chr20:48635729-48635823	ENSG00000211578.1,MIR766,miRNA,chrX:118664728-118664839	0	0	0	0	0	0	0	0	0	0	0	0	0	0
ENSG00000259164.1,RP11-463C8.4.1,coding,chr14:76634406-76761558	NA	ENSG00000257470.1,RP11-397H6.1.1,lncRNA,chr12:95941929-95969038	NA	ENSG00000208018.1,MIR645,miRNA,chr20:48635729-48635823	ENSG00000211578.1,MIR766,miRNA,chrX:118664728-118664839	0	0	0	0	0	0	0	0	0	0	0	0	0	0
ENSG00000259164.1,RP11-463C8.4.1,coding,chr14:76634406-76761558	NA	ENSG00000257470.1,RP11-397H6.1.1,lncRNA,chr12:95941929-95969038	ENSG00000232597.1,AC013727.1.1,lncRNA,chr2:103839859-103863099	ENSG00000208018.1,MIR645,miRNA,chr20:48635729-48635823	NA	0	0	0	0	0	0	0	0	0	0	0	0	0	0
ENSG00000259164.1,RP11-463C8.4.1,coding,chr14:76634406-76761558	NA	ENSG00000258747.1,RP11-163M18.1.1,lncRNA,chr14:44046359-44077466	ENSG00000232597.1,AC013727.1.1,lncRNA,chr2:103839859-103863099	ENSG00000208018.1,MIR645,miRNA,chr20:48635729-48635823	NA	0	0	0	0	0	0	0	0	0	0	0	0	0	0
ENSG00000259164.1,RP11-463C8.4.1,coding,chr14:76634406-76761558	NA	ENSG00000258747.1,RP11-163M18.1.1,lncRNA,chr14:44046359-44077466	ENSG00000257470.1,RP11-397H6.1.1,lncRNA,chr12:95941929-95969038	ENSG00000208018.1,MIR645,miRNA,chr20:48635729-48635823	NA	0	0	0	0	0	0	0	0	0	0	0	0	0	0
ENSG00000261190.1,RP11-152O14.5.1,coding,chr16:50596899-50669887	NA	ENSG00000259989.1,CTD-2555A7.1.1,lncRNA,chr16:87577940-87589278	ENSG00000231912.1,RP1-249H1.2.1,lncRNA,chr6:114219724-114265249	ENSG00000207627.1,MIR581,miRNA,chr5:53283090-53283186	NA	0	0	0	0	0	0	0	0	0	0	1	0	0	1
ENSG00000261190.1,RP11-152O14.5.1,coding,chr16:50596899-50669887	NA	ENSG00000223360.1,AC096559.2.1,lncRNA,chr2:12656563-12662722	ENSG00000231912.1,RP1-249H1.2.1,lncRNA,chr6:114219724-114265249	ENSG00000207627.1,MIR581,miRNA,chr5:53283090-53283186	NA	0	0	0	0	0	0	0	0	0	0	1	0	0	1
ENSG00000181371.2,OR5M8,coding,chr11:56014400-56015447	NA	ENSG00000236299.1,RP11-340I6.7.1,lncRNA,chr7:62986012-62996654	ENSG00000230440.1,RP13-329D4.3.1,lncRNA,chr20:26061522-26062834	ENSG00000199179.1,MIRLET7I,miRNA,chr12:61283732-61283817	NA	0	0	0	0	0	0	0	0	0	0	0	0	0	0
ENSG00000181371.2,OR5M8,coding,chr11:56014400-56015447	NA	ENSG00000234767.1,RP11-223F20.2.1,lncRNA,chr13:65338306-65350352	ENSG00000230440.1,RP13-329D4.3.1,lncRNA,chr20:26061522-26062834	ENSG00000199179.1,MIRLET7I,miRNA,chr12:61283732-61283817	NA	0	0	0	0	0	0	0	0	0	0	0	0	0	0
ENSG00000181371.2,OR5M8,coding,chr11:56014400-56015447	NA	ENSG00000232596.1,RP1-37J18.2.1,lncRNA,chr1:4531467-4543341	ENSG00000236299.1,RP11-340I6.7.1,lncRNA,chr7:62986012-62996654	ENSG00000199179.1,MIRLET7I,miRNA,chr12:61283732-61283817	NA	0	0	0	0	0	0	0	0	0	0	0	0	0	0
ENSG00000186306.1,OR10T2,coding,chr1:156634935-156635880	NA	ENSG00000232299.1,RP1-105O18.1.1,lncRNA,chr6:112904432-112909531	ENSG00000229943.1,RP11-93N20.1.1,lncRNA,chr1:75201585-75203390	ENSG00000199179.1,MIRLET7I,miRNA,chr12:61283732-61283817	NA	0	0	0	0	0	0	0	0	0	0	0	0	0	0
ENSG00000186306.1,OR10T2,coding,chr1:156634935-156635880	ENSG00000241595.1,KRTAP9-4,coding,chr17:36659464-36660430	ENSG00000229943.1,RP11-93N20.1.1,lncRNA,chr1:75201585-75203390	NA	ENSG00000199179.1,MIRLET7I,miRNA,chr12:61283732-61283817	NA	0	0	0	0	0	0	0	0	0	0	0	0	0	0
ENSG00000211783.3,TRAV9-1,coding,chr14:21349513-21349989	NA	ENSG00000233516.1,RP11-388N2.1.1,lncRNA,chr9:119264392-119268359	ENSG00000228277.1,AC112518.3.1,lncRNA,chr4:74794882-74799108	ENSG00000221091.1,MIR1302-5,miRNA,chr20:48664579-48664729	NA	0	0	0	0	0	0	0	0	0	0	0	0	0	0
ENSG00000211783.3,TRAV9-1,coding,chr14:21349513-21349989	NA	ENSG00000233516.1,RP11-388N2.1.1,lncRNA,chr9:119264392-119268359	ENSG00000234172.1,AC093639.1.1,lncRNA,chr2:184477500-184522084	ENSG00000221091.1,MIR1302-5,miRNA,chr20:48664579-48664729	NA	0	0	0	0	0	0	0	0	0	0	0	0	0	0
ENSG00000259164.1,RP11-463C8.4.1,coding,chr14:76634406-76761558	NA	ENSG00000258747.1,RP11-163M18.1.1,lncRNA,chr14:44046359-44077466	ENSG00000227981.2,AC012668.3.1,lncRNA,chr2:216152374-216155603	ENSG00000207996.1,MIR301A,miRNA,chr17:54583278-54583364	NA	0	0	0	0	0	0	0	0	0	0	0	0	0	0
ENSG00000188069.3,OR51F1,coding,chr11:4746784-4747744	NA	ENSG00000255132.1,RP11-63C8.1.1,lncRNA,chr11:41372720-41404630	NA	ENSG00000207983.1,MIR613,miRNA,chr12:12808849-12808944	ENSG00000207996.1,MIR301A,miRNA,chr17:54583278-54583364	0	0	0	0	0	0	0	1	0	0	0	0	0	1
ENSG00000259164.1,RP11-463C8.4.1,coding,chr14:76634406-76761558	NA	ENSG00000258747.1,RP11-163M18.1.1,lncRNA,chr14:44046359-44077466	NA	ENSG00000221525.1,MIR1185-1,miRNA,chr14:100579066-100579152	ENSG00000207996.1,MIR301A,miRNA,chr17:54583278-54583364	0	0	0	0	0	0	0	0	0	0	0	0	0	0
ENSG00000259164.1,RP11-463C8.4.1,coding,chr14:76634406-76761558	NA	ENSG00000258747.1,RP11-163M18.1.1,lncRNA,chr14:44046359-44077466	ENSG00000248799.1,CTC-548H10.2.1,lncRNA,chr5:127015283-127027620	ENSG00000207996.1,MIR301A,miRNA,chr17:54583278-54583364	NA	0	0	0	0	0	0	0	0	0	0	0	0	0	0
ENSG00000257198.1,AL589645.1,coding,chr9:34822641-34828583	NA	ENSG00000258719.1,RP11-232C2.3.1,lncRNA,chr14:78231416-78234218	ENSG00000249490.1,CTD-2333M24.1.1,lncRNA,chr5:20648490-20650631	ENSG00000207996.1,MIR301A,miRNA,chr17:54583278-54583364	NA	0	0	0	0	0	0	0	0	0	0	0	0	0	0
ENSG00000188069.3,OR51F1,coding,chr11:4746784-4747744	NA	ENSG00000255132.1,RP11-63C8.1.1,lncRNA,chr11:41372720-41404630	ENSG00000251276.1,MAGI2-AS1,lncRNA,chr7:78407101-78408147	ENSG00000207996.1,MIR301A,miRNA,chr17:54583278-54583364	NA	0	0	0	0	0	0	0	1	0	0	0	0	0	1
ENSG00000259164.1,RP11-463C8.4.1,coding,chr14:76634406-76761558	NA	ENSG00000258747.1,RP11-163M18.1.1,lncRNA,chr14:44046359-44077466	ENSG00000255132.1,RP11-63C8.1.1,lncRNA,chr11:41372720-41404630	ENSG00000207996.1,MIR301A,miRNA,chr17:54583278-54583364	NA	0	0	0	0	0	0	0	0	0	0	0	0	0	0
ENSG00000130538.4,OR11H1,coding,chr22:14828823-14829805	ENSG00000185303.9,SFTPA2,coding,chr10:80985613-80990169	ENSG00000254178.1,RP11-299D14.2.1,lncRNA,chr8:25747561-25753568	NA	ENSG00000207956.1,MIR579,miRNA,chr5:32430240-32430338	NA	0	0	0	0	0	0	0	1	0	0	0	1	0	2
ENSG00000184724.4,KRTAP6-1,coding,chr21:30907620-30911767	ENSG00000179709.3,NLRP8,coding,chr19:61151009-61191807	ENSG00000233866.1,LA16c-4G1.3.1,lncRNA,chr22:14442156-14443236	NA	ENSG00000221464.1,MIR1271,miRNA,chr5:175727554-175727640	NA	0	0	0	0	0	0	0	1	0	0	0	0	0	1
ENSG00000184724.4,KRTAP6-1,coding,chr21:30907620-30911767	NA	ENSG00000233866.1,LA16c-4G1.3.1,lncRNA,chr22:14442156-14443236	NA	ENSG00000221464.1,MIR1271,miRNA,chr5:175727554-175727640	ENSG00000207988.1,MIR576,miRNA,chr4:110629302-110629400	0	0	0	0	0	0	0	1	0	0	0	0	0	1
ENSG00000177151.3,OR2T35,coding,chr1:246868210-246869182	ENSG00000184724.4,KRTAP6-1,coding,chr21:30907620-30911767	ENSG00000233866.1,LA16c-4G1.3.1,lncRNA,chr22:14442156-14443236	NA	ENSG00000221464.1,MIR1271,miRNA,chr5:175727554-175727640	NA	0	0	0	0	0	0	0	0	1	0	0	0	0	1
ENSG00000177151.3,OR2T35,coding,chr1:246868210-246869182	NA	ENSG00000233866.1,LA16c-4G1.3.1,lncRNA,chr22:14442156-14443236	NA	ENSG00000221464.1,MIR1271,miRNA,chr5:175727554-175727640	ENSG00000207989.1,MIR493,miRNA,chr14:100405149-100405238	0	0	0	0	0	0	0	0	0	0	0	0	0	0
ENSG00000184724.4,KRTAP6-1,coding,chr21:30907620-30911767	ENSG00000212938.3,KRTAP6-3,coding,chr21:30886629-30887265	ENSG00000233866.1,LA16c-4G1.3.1,lncRNA,chr22:14442156-14443236	NA	ENSG00000221464.1,MIR1271,miRNA,chr5:175727554-175727640	NA	0	0	0	0	0	0	0	1	0	0	0	0	0	1
ENSG00000184724.4,KRTAP6-1,coding,chr21:30907620-30911767	NA	ENSG00000233866.1,LA16c-4G1.3.1,lncRNA,chr22:14442156-14443236	NA	ENSG00000221464.1,MIR1271,miRNA,chr5:175727554-175727640	ENSG00000207989.1,MIR493,miRNA,chr14:100405149-100405238	0	0	0	0	0	0	0	1	0	0	0	0	0	1
ENSG00000177151.3,OR2T35,coding,chr1:246868210-246869182	ENSG00000184724.4,KRTAP6-1,coding,chr21:30907620-30911767	ENSG00000233866.1,LA16c-4G1.3.1,lncRNA,chr22:14442156-14443236	NA	ENSG00000207989.1,MIR493,miRNA,chr14:100405149-100405238	NA	0	0	0	0	0	0	0	0	1	0	0	0	0	1
ENSG00000256892.1,MTRNR2L7,coding,chr10:37930371-37931865	NA	ENSG00000227823.1,RP11-271F18.2.1,lncRNA,chr10:10517917-10544254	ENSG00000229005.1,RP5-881L22.4.1,lncRNA,chr20:42439796-42457760	ENSG00000207780.1,MIR648,miRNA,chr22:16843633-16843727	NA	0	0	0	0	0	0	0	0	0	0	0	0	0	0
ENSG00000169488.5,OR4K15,coding,chr14:19513442-19514658	NA	ENSG00000229943.1,RP11-93N20.1.1,lncRNA,chr1:75201585-75203390	ENSG00000254361.1,RP11-238K6.2.1,lncRNA,chr8:138933751-139010469	ENSG00000207780.1,MIR648,miRNA,chr22:16843633-16843727	NA	0	0	0	0	0	0	0	0	0	0	0	0	0	0
ENSG00000169488.5,OR4K15,coding,chr14:19513442-19514658	NA	ENSG00000250242.1,RP11-438C19.1.1,lncRNA,chr5:114451487-114452071	ENSG00000249111.1,RP11-622J8.1.1,lncRNA,chr4:59701146-59724459	ENSG00000207780.1,MIR648,miRNA,chr22:16843633-16843727	NA	0	0	0	0	0	0	0	0	0	0	0	0	0	0
ENSG00000166930.2,MS4A5,coding,chr11:59953637-59979263	NA	ENSG00000223410.1,RP1-191L6.2.1,lncRNA,chr20:38183095-38188412	ENSG00000244599.1,C10orf43.1,lncRNA,chr10:47212398-47217206	ENSG00000207612.1,MIR604,miRNA,chr10:29873938-29874032	NA	0	0	0	0	0	0	0	0	0	0	0	0	0	0
ENSG00000184724.4,KRTAP6-1,coding,chr21:30907620-30911767	ENSG00000179709.3,NLRP8,coding,chr19:61151009-61191807	ENSG00000227485.1,RP11-5P4.2.1,lncRNA,chr1:63262465-63263917	NA	ENSG00000221464.1,MIR1271,miRNA,chr5:175727554-175727640	NA	0	0	0	0	0	0	0	1	0	0	0	0	0	1
ENSG00000184724.4,KRTAP6-1,coding,chr21:30907620-30911767	NA	ENSG00000227485.1,RP11-5P4.2.1,lncRNA,chr1:63262465-63263917	NA	ENSG00000221464.1,MIR1271,miRNA,chr5:175727554-175727640	ENSG00000207988.1,MIR576,miRNA,chr4:110629302-110629400	0	0	0	0	0	0	0	1	0	0	0	0	0	1
ENSG00000177151.3,OR2T35,coding,chr1:246868210-246869182	ENSG00000184724.4,KRTAP6-1,coding,chr21:30907620-30911767	ENSG00000227485.1,RP11-5P4.2.1,lncRNA,chr1:63262465-63263917	NA	ENSG00000221464.1,MIR1271,miRNA,chr5:175727554-175727640	NA	0	0	0	0	0	0	0	0	1	0	0	0	0	1
ENSG00000177151.3,OR2T35,coding,chr1:246868210-246869182	NA	ENSG00000227485.1,RP11-5P4.2.1,lncRNA,chr1:63262465-63263917	NA	ENSG00000221464.1,MIR1271,miRNA,chr5:175727554-175727640	ENSG00000207989.1,MIR493,miRNA,chr14:100405149-100405238	0	0	0	0	0	0	0	0	0	0	0	0	0	0
ENSG00000184724.4,KRTAP6-1,coding,chr21:30907620-30911767	NA	ENSG00000227485.1,RP11-5P4.2.1,lncRNA,chr1:63262465-63263917	ENSG00000249490.1,CTD-2333M24.1.1,lncRNA,chr5:20648490-20650631	ENSG00000221464.1,MIR1271,miRNA,chr5:175727554-175727640	NA	0	0	0	0	0	0	0	1	0	0	0	0	0	1
ENSG00000184724.4,KRTAP6-1,coding,chr21:30907620-30911767	NA	ENSG00000227485.1,RP11-5P4.2.1,lncRNA,chr1:63262465-63263917	ENSG00000228176.1,RP4-656G21.1.1,lncRNA,chr1:29954284-29954981	ENSG00000221464.1,MIR1271,miRNA,chr5:175727554-175727640	NA	0	0	0	0	0	0	0	1	0	0	0	0	0	1
ENSG00000184724.4,KRTAP6-1,coding,chr21:30907620-30911767	NA	ENSG00000227485.1,RP11-5P4.2.1,lncRNA,chr1:63262465-63263917	NA	ENSG00000221464.1,MIR1271,miRNA,chr5:175727554-175727640	ENSG00000207989.1,MIR493,miRNA,chr14:100405149-100405238	0	0	0	0	0	0	0	1	0	0	0	0	0	1
ENSG00000150261.2,OR8K1,coding,chr11:55869996-55871083	NA	ENSG00000234686.1,AC010971.1.1,lncRNA,chr7:49240278-49264958	ENSG00000227485.1,RP11-5P4.2.1,lncRNA,chr1:63262465-63263917	ENSG00000221464.1,MIR1271,miRNA,chr5:175727554-175727640	NA	0	0	0	0	0	0	0	0	0	0	0	0	0	0
ENSG00000150261.2,OR8K1,coding,chr11:55869996-55871083	NA	ENSG00000227485.1,RP11-5P4.2.1,lncRNA,chr1:63262465-63263917	ENSG00000231597.1,AC007557.4.1,lncRNA,chr2:217427356-217428100	ENSG00000221464.1,MIR1271,miRNA,chr5:175727554-175727640	NA	0	0	0	0	0	0	0	0	0	0	0	0	0	0
ENSG00000150261.2,OR8K1,coding,chr11:55869996-55871083	NA	ENSG00000236828.1,DMD-AS3,lncRNA,chrX:32682977-32684438	ENSG00000227485.1,RP11-5P4.2.1,lncRNA,chr1:63262465-63263917	ENSG00000221464.1,MIR1271,miRNA,chr5:175727554-175727640	NA	0	0	0	0	0	0	0	0	0	0	0	0	0	0
ENSG00000150261.2,OR8K1,coding,chr11:55869996-55871083	NA	ENSG00000227485.1,RP11-5P4.2.1,lncRNA,chr1:63262465-63263917	NA	ENSG00000221464.1,MIR1271,miRNA,chr5:175727554-175727640	ENSG00000207989.1,MIR493,miRNA,chr14:100405149-100405238	0	0	0	0	0	0	0	0	0	0	0	0	0	0
ENSG00000150261.2,OR8K1,coding,chr11:55869996-55871083	NA	ENSG00000234116.1,RP11-261C10.1.1,lncRNA,chr1:241235769-241237393	ENSG00000227485.1,RP11-5P4.2.1,lncRNA,chr1:63262465-63263917	ENSG00000221464.1,MIR1271,miRNA,chr5:175727554-175727640	NA	0	0	0	0	0	0	0	0	0	0	0	0	0	0
ENSG00000150261.2,OR8K1,coding,chr11:55869996-55871083	NA	ENSG00000233519.1,RP11-177F11.1.1,lncRNA,chr1:238630593-238631046	ENSG00000227485.1,RP11-5P4.2.1,lncRNA,chr1:63262465-63263917	ENSG00000221464.1,MIR1271,miRNA,chr5:175727554-175727640	NA	0	0	0	0	0	0	0	0	0	0	0	0	0	0
ENSG00000177151.3,OR2T35,coding,chr1:246868210-246869182	ENSG00000184724.4,KRTAP6-1,coding,chr21:30907620-30911767	ENSG00000227485.1,RP11-5P4.2.1,lncRNA,chr1:63262465-63263917	NA	ENSG00000207989.1,MIR493,miRNA,chr14:100405149-100405238	NA	0	0	0	0	0	0	0	0	1	0	0	0	0	1
ENSG00000184724.4,KRTAP6-1,coding,chr21:30907620-30911767	NA	ENSG00000227485.1,RP11-5P4.2.1,lncRNA,chr1:63262465-63263917	ENSG00000249490.1,CTD-2333M24.1.1,lncRNA,chr5:20648490-20650631	ENSG00000207989.1,MIR493,miRNA,chr14:100405149-100405238	NA	0	0	0	0	0	0	0	1	0	0	0	0	0	1
ENSG00000214819.1,CDRT15L2,coding,chr17:20423628-20424816	NA	ENSG00000224932.1,AC107399.2.1,lncRNA,chr4:118455200-118501243	ENSG00000258496.1,RP11-1141N12.1.1,lncRNA,chr14:86787199-86787776	ENSG00000207944.1,MIR574,miRNA,chr4:38546047-38546143	NA	0	0	0	0	0	0	0	0	0	0	0	0	0	0
ENSG00000244624.2,KRTAP20-1,coding,chr21:30910620-30910874	NA	ENSG00000224932.1,AC107399.2.1,lncRNA,chr4:118455200-118501243	ENSG00000258496.1,RP11-1141N12.1.1,lncRNA,chr14:86787199-86787776	ENSG00000199036.1,MIR219-1,miRNA,chr6:33283589-33283699	NA	0	0	0	0	0	0	0	0	0	0	0	0	0	0
ENSG00000214819.1,CDRT15L2,coding,chr17:20423628-20424816	NA	ENSG00000249877.1,RP11-706F1.2.1,lncRNA,chr4:190446824-190449484	ENSG00000258496.1,RP11-1141N12.1.1,lncRNA,chr14:86787199-86787776	ENSG00000207944.1,MIR574,miRNA,chr4:38546047-38546143	NA	0	0	0	0	0	0	0	0	0	0	0	0	0	0
ENSG00000214819.1,CDRT15L2,coding,chr17:20423628-20424816	NA	ENSG00000233519.1,RP11-177F11.1.1,lncRNA,chr1:238630593-238631046	ENSG00000258496.1,RP11-1141N12.1.1,lncRNA,chr14:86787199-86787776	ENSG00000207944.1,MIR574,miRNA,chr4:38546047-38546143	NA	0	0	0	0	0	0	0	0	0	0	0	0	0	0
ENSG00000183470.4,AC009365.3.1,coding,chr7:131984092-132064068	NA	ENSG00000258496.1,RP11-1141N12.1.1,lncRNA,chr14:86787199-86787776	ENSG00000260026.1,CTD-2015G9.1.1,lncRNA,chr16:85311794-85313061	ENSG00000207944.1,MIR574,miRNA,chr4:38546047-38546143	NA	0	0	0	0	0	0	0	1	0	0	0	0	0	1
ENSG00000172208.3,OR4X2,coding,chr11:48223183-48224198	NA	ENSG00000259111.1,RP11-280K24.1.1,lncRNA,chr14:51287027-51299582	ENSG00000231933.1,CTA-125H2.2.1,lncRNA,chr22:24618322-24625802	ENSG00000207597.1,MIR490,miRNA,chr7:136238453-136238581	NA	0	0	0	0	0	0	0	0	0	0	0	0	0	0
ENSG00000177151.3,OR2T35,coding,chr1:246868210-246869182	NA	ENSG00000231933.1,CTA-125H2.2.1,lncRNA,chr22:24618322-24625802	NA	ENSG00000221464.1,MIR1271,miRNA,chr5:175727554-175727640	ENSG00000207989.1,MIR493,miRNA,chr14:100405149-100405238	0	0	0	0	0	0	0	0	0	0	0	0	0	0
ENSG00000172208.3,OR4X2,coding,chr11:48223183-48224198	ENSG00000237388.2,OR4A47,coding,chr11:48466844-48467908	ENSG00000231933.1,CTA-125H2.2.1,lncRNA,chr22:24618322-24625802	NA	ENSG00000207597.1,MIR490,miRNA,chr7:136238453-136238581	NA	0	0	0	0	0	0	0	0	0	0	0	0	0	0
ENSG00000237247.2,MBD3L5,coding,chr19:6981588-6984053	NA	ENSG00000226771.1,AP001136.2.1,lncRNA,chr21:21517486-21521021	ENSG00000261715.1,RP11-653G8.2.1,lncRNA,chr18:35900247-35933195	ENSG00000208017.1,MIR140,miRNA,chr16:68524484-68524584	NA	0	0	0	0	0	0	0	0	0	0	1	0	0	1
ENSG00000214306.3,AP001024.2,coding,chr11:107148338-107152554	NA	ENSG00000259989.1,CTD-2555A7.1.1,lncRNA,chr16:87577940-87589278	NA	ENSG00000212044.1,MIR548U,miRNA,chr1:147589954-147590046	ENSG00000207588.1,MIR593,miRNA,chr7:127509148-127509248	0	0	0	0	0	0	0	0	0	0	0	0	0	0
ENSG00000214306.3,AP001024.2,coding,chr11:107148338-107152554	NA	ENSG00000259989.1,CTD-2555A7.1.1,lncRNA,chr16:87577940-87589278	ENSG00000223817.1,CDH23-AS1,lncRNA,chr10:72937915-72941636	ENSG00000212044.1,MIR548U,miRNA,chr1:147589954-147590046	NA	0	0	0	0	0	0	0	0	0	0	0	0	0	0
ENSG00000261717.1,RP11-77K12.1.1,coding,chr16:74004082-74056105	ENSG00000215356.3,ZNF705B,coding,chr8:7821268-7849681	ENSG00000232597.1,AC013727.1.1,lncRNA,chr2:103839859-103863099	NA	ENSG00000211578.1,MIR766,miRNA,chrX:118664728-118664839	NA	0	0	0	0	0	0	0	0	1	0	0	0	0	1
ENSG00000215356.3,ZNF705B,coding,chr8:7821268-7849681	NA	ENSG00000232597.1,AC013727.1.1,lncRNA,chr2:103839859-103863099	NA	ENSG00000199072.1,MIRLET7F1,miRNA,chr9:95978449-95978536	ENSG00000211578.1,MIR766,miRNA,chrX:118664728-118664839	0	0	0	0	0	0	0	1	0	0	0	1	0	2
ENSG00000215356.3,ZNF705B,coding,chr8:7821268-7849681	NA	ENSG00000225570.1,AC013733.4.1,lncRNA,chr2:182263351-182266387	NA	ENSG00000199072.1,MIRLET7F1,miRNA,chr9:95978449-95978536	ENSG00000211578.1,MIR766,miRNA,chrX:118664728-118664839	0	0	0	0	0	0	0	1	0	0	0	1	0	2
ENSG00000215356.3,ZNF705B,coding,chr8:7821268-7849681	NA	ENSG00000232597.1,AC013727.1.1,lncRNA,chr2:103839859-103863099	ENSG00000225570.1,AC013733.4.1,lncRNA,chr2:182263351-182266387	ENSG00000199072.1,MIRLET7F1,miRNA,chr9:95978449-95978536	NA	0	0	0	0	0	0	0	1	0	0	0	1	0	2
ENSG00000215356.3,ZNF705B,coding,chr8:7821268-7849681	NA	ENSG00000227090.1,AP000402.3.1,lncRNA,chr21:25180860-25196941	ENSG00000232624.1,RP11-478H13.3.1,lncRNA,chr10:29135881-29137154	ENSG00000208017.1,MIR140,miRNA,chr16:68524484-68524584	NA	0	0	0	0	0	0	0	1	0	0	0	0	0	1
ENSG00000215356.3,ZNF705B,coding,chr8:7821268-7849681	NA	ENSG00000227090.1,AP000402.3.1,lncRNA,chr21:25180860-25196941	ENSG00000235949.1,AC061961.2.1,lncRNA,chr2:155261219-155262575	ENSG00000208017.1,MIR140,miRNA,chr16:68524484-68524584	NA	0	0	0	0	0	0	0	1	0	0	0	0	0	1
ENSG00000240215.3,TRBV25OR9-2,coding,chr9:33652187-33652660	ENSG00000215356.3,ZNF705B,coding,chr8:7821268-7849681	ENSG00000227090.1,AP000402.3.1,lncRNA,chr21:25180860-25196941	NA	ENSG00000208017.1,MIR140,miRNA,chr16:68524484-68524584	NA	0	0	0	0	0	0	0	0	1	0	0	0	0	1
ENSG00000215356.3,ZNF705B,coding,chr8:7821268-7849681	NA	ENSG00000227090.1,AP000402.3.1,lncRNA,chr21:25180860-25196941	ENSG00000248753.1,CTC-276P9.2.1,lncRNA,chr5:134484114-134503270	ENSG00000208017.1,MIR140,miRNA,chr16:68524484-68524584	NA	0	0	0	0	0	0	0	1	0	0	0	0	0	1
ENSG00000204823.3,AC008676.1,coding,chr5:156735326-156744525	ENSG00000215356.3,ZNF705B,coding,chr8:7821268-7849681	ENSG00000232597.1,AC013727.1.1,lncRNA,chr2:103839859-103863099	NA	ENSG00000211578.1,MIR766,miRNA,chrX:118664728-118664839	NA	0	0	0	0	0	0	0	0	1	0	0	0	0	1
ENSG00000215356.3,ZNF705B,coding,chr8:7821268-7849681	NA	ENSG00000232597.1,AC013727.1.1,lncRNA,chr2:103839859-103863099	ENSG00000225570.1,AC013733.4.1,lncRNA,chr2:182263351-182266387	ENSG00000211578.1,MIR766,miRNA,chrX:118664728-118664839	NA	0	0	0	0	0	0	0	1	0	0	0	0	0	1
ENSG00000215356.3,ZNF705B,coding,chr8:7821268-7849681	NA	ENSG00000232624.1,RP11-478H13.3.1,lncRNA,chr10:29135881-29137154	ENSG00000232464.1,CTA-125H2.1.1,lncRNA,chr22:24685039-24709492	ENSG00000208017.1,MIR140,miRNA,chr16:68524484-68524584	NA	0	0	0	0	0	0	0	1	0	0	0	0	0	1
ENSG00000203812.2,HIST2H2AA4,coding,chr1:148089266-148089815	NA	ENSG00000233193.1,AC005324.7.1,lncRNA,chr17:15605652-15607808	ENSG00000258874.1,RP11-232C2.2.1,lncRNA,chr14:78239710-78246030	ENSG00000221091.1,MIR1302-5,miRNA,chr20:48664579-48664729	NA	0	0	0	0	0	0	0	0	0	1	1	0	0	2
ENSG00000003249.8,DBNDD1,coding,chr16:88598773-88614037	NA	ENSG00000233193.1,AC005324.7.1,lncRNA,chr17:15605652-15607808	ENSG00000258874.1,RP11-232C2.2.1,lncRNA,chr14:78239710-78246030	ENSG00000221091.1,MIR1302-5,miRNA,chr20:48664579-48664729	NA	0	0	0	0	0	0	0	0	0	1	1	0	0	2
ENSG00000259164.1,RP11-463C8.4.1,coding,chr14:76634406-76761558	NA	ENSG00000227823.1,RP11-271F18.2.1,lncRNA,chr10:10517917-10544254	ENSG00000234306.1,RP11-271F18.1.1,lncRNA,chr10:10447148-10448456	ENSG00000211589.1,MIR744,miRNA,chr17:11925940-11926038	NA	0	0	0	0	0	0	0	0	0	0	0	0	0	0
ENSG00000259164.1,RP11-463C8.4.1,coding,chr14:76634406-76761558	NA	ENSG00000257470.1,RP11-397H6.1.1,lncRNA,chr12:95941929-95969038	ENSG00000227823.1,RP11-271F18.2.1,lncRNA,chr10:10517917-10544254	ENSG00000211589.1,MIR744,miRNA,chr17:11925940-11926038	NA	0	0	0	0	0	0	0	0	0	0	0	0	0	0
ENSG00000259164.1,RP11-463C8.4.1,coding,chr14:76634406-76761558	NA	ENSG00000258747.1,RP11-163M18.1.1,lncRNA,chr14:44046359-44077466	ENSG00000227823.1,RP11-271F18.2.1,lncRNA,chr10:10517917-10544254	ENSG00000211589.1,MIR744,miRNA,chr17:11925940-11926038	NA	0	0	0	0	0	0	0	0	0	0	0	0	0	0
ENSG00000213417.2,KRTAP2-4,coding,chr17:36474894-36475657	NA	ENSG00000237266.1,AC010729.3.1,lncRNA,chr2:5868223-5870179	ENSG00000234306.1,RP11-271F18.1.1,lncRNA,chr10:10447148-10448456	ENSG00000211589.1,MIR744,miRNA,chr17:11925940-11926038	NA	0	0	0	0	0	0	0	0	0	0	0	0	0	0
ENSG00000259164.1,RP11-463C8.4.1,coding,chr14:76634406-76761558	NA	ENSG00000237266.1,AC010729.3.1,lncRNA,chr2:5868223-5870179	ENSG00000234306.1,RP11-271F18.1.1,lncRNA,chr10:10447148-10448456	ENSG00000211589.1,MIR744,miRNA,chr17:11925940-11926038	NA	0	0	0	0	0	0	0	0	0	0	0	0	0	0
ENSG00000177151.3,OR2T35,coding,chr1:246868210-246869182	NA	ENSG00000237266.1,AC010729.3.1,lncRNA,chr2:5868223-5870179	ENSG00000257470.1,RP11-397H6.1.1,lncRNA,chr12:95941929-95969038	ENSG00000211589.1,MIR744,miRNA,chr17:11925940-11926038	NA	0	0	0	0	0	0	0	0	0	0	0	0	0	0
ENSG00000181371.2,OR5M8,coding,chr11:56014400-56015447	NA	ENSG00000237266.1,AC010729.3.1,lncRNA,chr2:5868223-5870179	ENSG00000223479.2,RP11-275A6.1.1,lncRNA,chr1:73873486-73947852	ENSG00000211589.1,MIR744,miRNA,chr17:11925940-11926038	NA	0	0	0	0	0	0	0	0	0	0	0	0	0	0
ENSG00000259164.1,RP11-463C8.4.1,coding,chr14:76634406-76761558	NA	ENSG00000237266.1,AC010729.3.1,lncRNA,chr2:5868223-5870179	ENSG00000257470.1,RP11-397H6.1.1,lncRNA,chr12:95941929-95969038	ENSG00000211589.1,MIR744,miRNA,chr17:11925940-11926038	NA	0	0	0	0	0	0	0	0	0	0	0	0	0	0
ENSG00000213417.2,KRTAP2-4,coding,chr17:36474894-36475657	NA	ENSG00000237266.1,AC010729.3.1,lncRNA,chr2:5868223-5870179	ENSG00000223479.2,RP11-275A6.1.1,lncRNA,chr1:73873486-73947852	ENSG00000211589.1,MIR744,miRNA,chr17:11925940-11926038	NA	0	0	0	0	0	0	0	0	0	0	0	0	0	0
ENSG00000259164.1,RP11-463C8.4.1,coding,chr14:76634406-76761558	NA	ENSG00000237266.1,AC010729.3.1,lncRNA,chr2:5868223-5870179	ENSG00000258747.1,RP11-163M18.1.1,lncRNA,chr14:44046359-44077466	ENSG00000211589.1,MIR744,miRNA,chr17:11925940-11926038	NA	0	0	0	0	0	0	0	0	0	0	0	0	0	0
ENSG00000259164.1,RP11-463C8.4.1,coding,chr14:76634406-76761558	NA	ENSG00000257470.1,RP11-397H6.1.1,lncRNA,chr12:95941929-95969038	ENSG00000234306.1,RP11-271F18.1.1,lncRNA,chr10:10447148-10448456	ENSG00000211589.1,MIR744,miRNA,chr17:11925940-11926038	NA	0	0	0	0	0	0	0	0	0	0	0	0	0	0
ENSG00000213417.2,KRTAP2-4,coding,chr17:36474894-36475657	NA	ENSG00000223479.2,RP11-275A6.1.1,lncRNA,chr1:73873486-73947852	ENSG00000234306.1,RP11-271F18.1.1,lncRNA,chr10:10447148-10448456	ENSG00000211589.1,MIR744,miRNA,chr17:11925940-11926038	NA	0	0	0	0	0	0	0	0	0	0	0	0	0	0
ENSG00000259164.1,RP11-463C8.4.1,coding,chr14:76634406-76761558	NA	ENSG00000258747.1,RP11-163M18.1.1,lncRNA,chr14:44046359-44077466	ENSG00000234306.1,RP11-271F18.1.1,lncRNA,chr10:10447148-10448456	ENSG00000211589.1,MIR744,miRNA,chr17:11925940-11926038	NA	0	0	0	0	0	0	0	0	0	0	0	0	0	0
ENSG00000259164.1,RP11-463C8.4.1,coding,chr14:76634406-76761558	NA	ENSG00000258747.1,RP11-163M18.1.1,lncRNA,chr14:44046359-44077466	ENSG00000257470.1,RP11-397H6.1.1,lncRNA,chr12:95941929-95969038	ENSG00000211589.1,MIR744,miRNA,chr17:11925940-11926038	NA	0	0	0	0	0	0	0	0	0	0	0	0	0	0
ENSG00000172150.4,OR1A2,coding,chr17:3047562-3048492	NA	ENSG00000232170.1,GS1-756B1.2.1,lncRNA,chr10:8341299-8350274	ENSG00000236653.1,AC005235.1.1,lncRNA,chr2:198872331-198948066	ENSG00000221067.1,MIR1280,miRNA,chr3:129563697-129563791	NA	0	0	0	0	0	0	0	0	0	0	0	0	0	0
ENSG00000172150.4,OR1A2,coding,chr17:3047562-3048492	NA	ENSG00000232170.1,GS1-756B1.2.1,lncRNA,chr10:8341299-8350274	ENSG00000254178.1,RP11-299D14.2.1,lncRNA,chr8:25747561-25753568	ENSG00000221067.1,MIR1280,miRNA,chr3:129563697-129563791	NA	0	0	0	0	0	0	0	0	0	0	0	0	0	0
ENSG00000172150.4,OR1A2,coding,chr17:3047562-3048492	NA	ENSG00000257470.1,RP11-397H6.1.1,lncRNA,chr12:95941929-95969038	ENSG00000232170.1,GS1-756B1.2.1,lncRNA,chr10:8341299-8350274	ENSG00000221067.1,MIR1280,miRNA,chr3:129563697-129563791	NA	0	0	0	0	0	0	0	0	0	0	0	0	0	0
ENSG00000172150.4,OR1A2,coding,chr17:3047562-3048492	NA	ENSG00000258747.1,RP11-163M18.1.1,lncRNA,chr14:44046359-44077466	ENSG00000232170.1,GS1-756B1.2.1,lncRNA,chr10:8341299-8350274	ENSG00000221067.1,MIR1280,miRNA,chr3:129563697-129563791	NA	0	0	0	0	0	0	0	0	0	0	0	0	0	0
ENSG00000259164.1,RP11-463C8.4.1,coding,chr14:76634406-76761558	ENSG00000172150.4,OR1A2,coding,chr17:3047562-3048492	ENSG00000232170.1,GS1-756B1.2.1,lncRNA,chr10:8341299-8350274	NA	ENSG00000221067.1,MIR1280,miRNA,chr3:129563697-129563791	NA	0	0	0	0	0	0	0	0	0	0	0	0	0	0
ENSG00000259164.1,RP11-463C8.4.1,coding,chr14:76634406-76761558	ENSG00000172150.4,OR1A2,coding,chr17:3047562-3048492	ENSG00000236653.1,AC005235.1.1,lncRNA,chr2:198872331-198948066	NA	ENSG00000221067.1,MIR1280,miRNA,chr3:129563697-129563791	NA	0	0	0	0	0	0	0	0	0	0	0	0	0	0
ENSG00000172150.4,OR1A2,coding,chr17:3047562-3048492	NA	ENSG00000258747.1,RP11-163M18.1.1,lncRNA,chr14:44046359-44077466	ENSG00000257470.1,RP11-397H6.1.1,lncRNA,chr12:95941929-95969038	ENSG00000221067.1,MIR1280,miRNA,chr3:129563697-129563791	NA	0	0	0	0	0	0	0	0	0	0	0	0	0	0
ENSG00000172150.4,OR1A2,coding,chr17:3047562-3048492	NA	ENSG00000257470.1,RP11-397H6.1.1,lncRNA,chr12:95941929-95969038	ENSG00000249747.1,RP11-308K2.1.1,lncRNA,chr4:188360133-188367494	ENSG00000221067.1,MIR1280,miRNA,chr3:129563697-129563791	NA	0	0	0	0	0	0	0	0	0	0	1	0	0	1
ENSG00000259164.1,RP11-463C8.4.1,coding,chr14:76634406-76761558	ENSG00000172150.4,OR1A2,coding,chr17:3047562-3048492	ENSG00000257470.1,RP11-397H6.1.1,lncRNA,chr12:95941929-95969038	NA	ENSG00000221067.1,MIR1280,miRNA,chr3:129563697-129563791	NA	0	0	0	0	0	0	0	0	0	0	0	0	0	0
ENSG00000259164.1,RP11-463C8.4.1,coding,chr14:76634406-76761558	ENSG00000172150.4,OR1A2,coding,chr17:3047562-3048492	ENSG00000258747.1,RP11-163M18.1.1,lncRNA,chr14:44046359-44077466	NA	ENSG00000221067.1,MIR1280,miRNA,chr3:129563697-129563791	NA	0	0	0	0	0	0	0	0	0	0	0	0	0	0
ENSG00000188069.3,OR51F1,coding,chr11:4746784-4747744	NA	ENSG00000248223.1,CTD-2139B15.2.1,lncRNA,chr5:17407018-17408008	ENSG00000235154.1,CTA-280A3__B.2.1,lncRNA,chr22:46819190-46823030	ENSG00000251856.1,MIR449C,miRNA,chr5:54503846-54503938	NA	0	0	0	0	0	0	0	1	0	0	0	0	0	1
ENSG00000259164.1,RP11-463C8.4.1,coding,chr14:76634406-76761558	NA	ENSG00000257470.1,RP11-397H6.1.1,lncRNA,chr12:95941929-95969038	ENSG00000257095.1,RP11-364C11.2.1,lncRNA,chr12:117953226-118039149	ENSG00000211578.1,MIR766,miRNA,chrX:118664728-118664839	NA	0	0	0	0	0	0	0	0	0	0	0	0	0	0
ENSG00000244624.2,KRTAP20-1,coding,chr21:30910620-30910874	NA	ENSG00000236828.1,DMD-AS3,lncRNA,chrX:32682977-32684438	ENSG00000242339.1,RP11-735B13.2.1,lncRNA,chr3:85016776-85025220	ENSG00000221760.1,MIR548J,miRNA,chr22:25281177-25281289	NA	0	0	0	0	0	0	0	0	0	0	0	0	0	0
ENSG00000177151.3,OR2T35,coding,chr1:246868210-246869182	NA	ENSG00000235464.1,AC007652.1.1,lncRNA,chr7:35502155-35516398	NA	ENSG00000221464.1,MIR1271,miRNA,chr5:175727554-175727640	ENSG00000207989.1,MIR493,miRNA,chr14:100405149-100405238	0	0	0	0	0	0	0	0	0	0	0	0	0	0
ENSG00000174937.2,OR5M3,coding,chr11:55993539-55994590	NA	ENSG00000249343.1,CTD-2275D24.2.1,lncRNA,chr5:73654066-73659878	ENSG00000248942.1,CTD-2275D24.4.1,lncRNA,chr5:73637990-73639906	ENSG00000221634.1,MIR1276,miRNA,chr15:84114730-84114813	NA	0	0	0	0	0	0	0	0	0	0	0	0	0	0
ENSG00000206106.2,KRTAP22-2,coding,chr21:30884294-30884587	NA	ENSG00000258747.1,RP11-163M18.1.1,lncRNA,chr14:44046359-44077466	ENSG00000257470.1,RP11-397H6.1.1,lncRNA,chr12:95941929-95969038	ENSG00000207709.1,MIR197,miRNA,chr1:109943035-109943116	NA	0	0	0	0	0	0	0	0	0	0	0	0	0	0
ENSG00000259164.1,RP11-463C8.4.1,coding,chr14:76634406-76761558	ENSG00000206106.2,KRTAP22-2,coding,chr21:30884294-30884587	ENSG00000257470.1,RP11-397H6.1.1,lncRNA,chr12:95941929-95969038	NA	ENSG00000207709.1,MIR197,miRNA,chr1:109943035-109943116	NA	0	0	0	0	0	0	0	0	0	0	0	0	0	0
ENSG00000259164.1,RP11-463C8.4.1,coding,chr14:76634406-76761558	ENSG00000206106.2,KRTAP22-2,coding,chr21:30884294-30884587	ENSG00000258747.1,RP11-163M18.1.1,lncRNA,chr14:44046359-44077466	NA	ENSG00000207709.1,MIR197,miRNA,chr1:109943035-109943116	NA	0	0	0	0	0	0	0	0	0	0	0	0	0	0
ENSG00000259164.1,RP11-463C8.4.1,coding,chr14:76634406-76761558	NA	ENSG00000258747.1,RP11-163M18.1.1,lncRNA,chr14:44046359-44077466	ENSG00000257470.1,RP11-397H6.1.1,lncRNA,chr12:95941929-95969038	ENSG00000207709.1,MIR197,miRNA,chr1:109943035-109943116	NA	0	0	0	0	0	0	0	0	0	0	0	0	0	0
ENSG00000163046.11,ANKRD30BL,coding,chr2:132621633-132732012	ENSG00000124575.5,HIST1H1D,coding,chr6:26342418-26343195	ENSG00000258486.1,RN7SL1,lncRNA,chr14:49123046-49123346	NA	ENSG00000207985.1,MIR663A,miRNA,chr20:26136821-26136914	NA	0	0	0	0	0	0	0	0	0	0	0	0	0	0
ENSG00000257065.1,RP3-468K18.5.1,coding,chr6:144169921-144207447	NA	ENSG00000230761.1,RP11-342C24.8.1,lncRNA,chr10:46218375-46229027	ENSG00000257995.1,RP11-632B21.1.1,lncRNA,chr12:89535666-89540730	ENSG00000207574.1,MIR661,miRNA,chr8:145091346-145091435	NA	0	0	0	0	0	0	0	0	0	0	0	0	0	0
ENSG00000258728.1,RP11-195F19.29.1,coding,chr9:34636641-34647110	ENSG00000257065.1,RP3-468K18.5.1,coding,chr6:144169921-144207447	ENSG00000257995.1,RP11-632B21.1.1,lncRNA,chr12:89535666-89540730	NA	ENSG00000207574.1,MIR661,miRNA,chr8:145091346-145091435	NA	0	0	0	0	0	0	0	0	0	0	0	0	0	0
ENSG00000257065.1,RP3-468K18.5.1,coding,chr6:144169921-144207447	NA	ENSG00000236889.1,RP11-38J22.1.1,lncRNA,chr1:204330706-204332893	NA	ENSG00000221430.1,MIR1294,miRNA,chr5:153706858-153707000	ENSG00000207700.1,MIR145,miRNA,chr5:148790401-148790489	0	0	0	0	0	0	0	0	0	1	0	1	0	2
ENSG00000258728.1,RP11-195F19.29.1,coding,chr9:34636641-34647110	ENSG00000257065.1,RP3-468K18.5.1,coding,chr6:144169921-144207447	ENSG00000235491.1,AC097499.1.1,lncRNA,chr2:126185015-126239889	NA	ENSG00000207574.1,MIR661,miRNA,chr8:145091346-145091435	NA	0	0	0	0	0	0	0	0	0	0	0	0	0	0
ENSG00000258728.1,RP11-195F19.29.1,coding,chr9:34636641-34647110	ENSG00000257065.1,RP3-468K18.5.1,coding,chr6:144169921-144207447	ENSG00000230761.1,RP11-342C24.8.1,lncRNA,chr10:46218375-46229027	NA	ENSG00000207574.1,MIR661,miRNA,chr8:145091346-145091435	NA	0	0	0	0	0	0	0	0	0	0	0	0	0	0
ENSG00000257065.1,RP3-468K18.5.1,coding,chr6:144169921-144207447	NA	ENSG00000260450.1,RP11-523L20.1.1,lncRNA,chr16:46557083-46563099	ENSG00000230761.1,RP11-342C24.8.1,lncRNA,chr10:46218375-46229027	ENSG00000207574.1,MIR661,miRNA,chr8:145091346-145091435	NA	0	0	0	0	0	0	0	0	0	0	0	0	0	0
ENSG00000258728.1,RP11-195F19.29.1,coding,chr9:34636641-34647110	ENSG00000257065.1,RP3-468K18.5.1,coding,chr6:144169921-144207447	ENSG00000260450.1,RP11-523L20.1.1,lncRNA,chr16:46557083-46563099	NA	ENSG00000207574.1,MIR661,miRNA,chr8:145091346-145091435	NA	0	0	0	0	0	0	0	0	0	0	0	0	0	0
ENSG00000244624.2,KRTAP20-1,coding,chr21:30910620-30910874	NA	ENSG00000258426.1,RP11-452D21.1.1,lncRNA,chr14:82554297-82575699	ENSG00000234686.1,AC010971.1.1,lncRNA,chr7:49240278-49264958	ENSG00000221419.1,MIR1287,miRNA,chr10:100144964-100145054	NA	0	0	0	0	0	0	0	0	0	0	0	1	0	1
ENSG00000002822.9,MAD1L1,coding,chr7:1821908-2239404	ENSG00000163046.11,ANKRD30BL,coding,chr2:132621633-132732012	ENSG00000227195.1,RP3-410C9.1.1,lncRNA,chr20:26115654-26137869	NA	ENSG00000207985.1,MIR663A,miRNA,chr20:26136821-26136914	NA	0	0	0	0	0	0	0	0	0	0	0	0	0	0
ENSG00000004059.5,ARF5,coding,chr7:127015634-127018995	ENSG00000163046.11,ANKRD30BL,coding,chr2:132621633-132732012	ENSG00000227195.1,RP3-410C9.1.1,lncRNA,chr20:26115654-26137869	NA	ENSG00000207985.1,MIR663A,miRNA,chr20:26136821-26136914	NA	0	0	0	0	0	0	0	0	0	0	0	0	0	0
ENSG00000000938.7,FGR,coding,chr1:27811161-27834375	ENSG00000163046.11,ANKRD30BL,coding,chr2:132621633-132732012	ENSG00000227195.1,RP3-410C9.1.1,lncRNA,chr20:26115654-26137869	NA	ENSG00000207985.1,MIR663A,miRNA,chr20:26136821-26136914	NA	0	0	0	0	0	0	0	0	0	0	0	0	0	0
ENSG00000000971.10,CFH,coding,chr1:194887630-194983257	ENSG00000163046.11,ANKRD30BL,coding,chr2:132621633-132732012	ENSG00000227195.1,RP3-410C9.1.1,lncRNA,chr20:26115654-26137869	NA	ENSG00000207985.1,MIR663A,miRNA,chr20:26136821-26136914	NA	0	0	0	0	0	0	0	0	0	0	0	0	0	0
ENSG00000163046.11,ANKRD30BL,coding,chr2:132621633-132732012	ENSG00000124575.5,HIST1H1D,coding,chr6:26342418-26343195	ENSG00000227195.1,RP3-410C9.1.1,lncRNA,chr20:26115654-26137869	NA	ENSG00000207985.1,MIR663A,miRNA,chr20:26136821-26136914	NA	0	0	0	0	0	0	0	0	0	0	0	0	0	0
ENSG00000000419.7,DPM1,coding,chr20:48984810-49008499	ENSG00000163046.11,ANKRD30BL,coding,chr2:132621633-132732012	ENSG00000227195.1,RP3-410C9.1.1,lncRNA,chr20:26115654-26137869	NA	ENSG00000207985.1,MIR663A,miRNA,chr20:26136821-26136914	NA	0	0	0	0	0	0	0	0	0	0	0	0	0	0
ENSG00000000419.7,DPM1,coding,chr20:48984810-49008499	ENSG00000002822.9,MAD1L1,coding,chr7:1821908-2239404	ENSG00000227195.1,RP3-410C9.1.1,lncRNA,chr20:26115654-26137869	NA	ENSG00000207985.1,MIR663A,miRNA,chr20:26136821-26136914	NA	0	0	0	0	0	0	0	0	0	0	0	0	0	0
ENSG00000004059.5,ARF5,coding,chr7:127015634-127018995	ENSG00000000971.10,CFH,coding,chr1:194887630-194983257	ENSG00000227195.1,RP3-410C9.1.1,lncRNA,chr20:26115654-26137869	NA	ENSG00000207985.1,MIR663A,miRNA,chr20:26136821-26136914	NA	0	0	0	0	0	0	0	0	0	0	0	0	0	0
ENSG00000004059.5,ARF5,coding,chr7:127015634-127018995	ENSG00000000419.7,DPM1,coding,chr20:48984810-49008499	ENSG00000227195.1,RP3-410C9.1.1,lncRNA,chr20:26115654-26137869	NA	ENSG00000207985.1,MIR663A,miRNA,chr20:26136821-26136914	NA	0	0	0	0	0	0	0	0	0	0	0	0	0	0
ENSG00000004059.5,ARF5,coding,chr7:127015634-127018995	ENSG00000000457.8,SCYL3,coding,chr1:168088427-168130032	ENSG00000227195.1,RP3-410C9.1.1,lncRNA,chr20:26115654-26137869	NA	ENSG00000207985.1,MIR663A,miRNA,chr20:26136821-26136914	NA	0	0	0	0	0	0	0	0	0	0	0	0	0	0
ENSG00000000938.7,FGR,coding,chr1:27811161-27834375	ENSG00000000971.10,CFH,coding,chr1:194887630-194983257	ENSG00000227195.1,RP3-410C9.1.1,lncRNA,chr20:26115654-26137869	NA	ENSG00000207985.1,MIR663A,miRNA,chr20:26136821-26136914	NA	0	0	0	0	0	0	0	0	0	0	0	0	0	0
ENSG00000000938.7,FGR,coding,chr1:27811161-27834375	ENSG00000000419.7,DPM1,coding,chr20:48984810-49008499	ENSG00000227195.1,RP3-410C9.1.1,lncRNA,chr20:26115654-26137869	NA	ENSG00000207985.1,MIR663A,miRNA,chr20:26136821-26136914	NA	0	0	0	0	0	0	0	0	0	0	0	0	0	0
ENSG00000000971.10,CFH,coding,chr1:194887630-194983257	ENSG00000000457.8,SCYL3,coding,chr1:168088427-168130032	ENSG00000227195.1,RP3-410C9.1.1,lncRNA,chr20:26115654-26137869	NA	ENSG00000207985.1,MIR663A,miRNA,chr20:26136821-26136914	NA	0	0	0	0	0	0	0	0	0	0	0	0	0	0
ENSG00000204933.1,AC005392.1,coding,chr19:48571499-48575116	NA	ENSG00000223623.1,RP3-425P12.1.1,lncRNA,chr6:25161833-25165280	ENSG00000237480.1,RP5-947P14.1.1,lncRNA,chr1:106417391-106428644	ENSG00000221410.1,MIR1238,miRNA,chr19:10523797-10523880	NA	0	0	0	0	0	0	0	0	0	0	0	0	0	0
ENSG00000176742.1,OR51V1,coding,chr11:5177540-5178506	NA	ENSG00000223623.1,RP3-425P12.1.1,lncRNA,chr6:25161833-25165280	ENSG00000237480.1,RP5-947P14.1.1,lncRNA,chr1:106417391-106428644	ENSG00000221410.1,MIR1238,miRNA,chr19:10523797-10523880	NA	0	0	0	0	0	0	0	0	0	0	0	0	0	0
ENSG00000206536.1,OR5K3,coding,chr3:99592199-99593165	NA	ENSG00000223623.1,RP3-425P12.1.1,lncRNA,chr6:25161833-25165280	ENSG00000237480.1,RP5-947P14.1.1,lncRNA,chr1:106417391-106428644	ENSG00000221410.1,MIR1238,miRNA,chr19:10523797-10523880	NA	0	0	0	0	0	0	0	0	0	0	0	0	0	0
ENSG00000221900.3,POM121L12,coding,chr7:53070828-53072111	NA	ENSG00000223623.1,RP3-425P12.1.1,lncRNA,chr6:25161833-25165280	ENSG00000237480.1,RP5-947P14.1.1,lncRNA,chr1:106417391-106428644	ENSG00000221410.1,MIR1238,miRNA,chr19:10523797-10523880	NA	0	0	0	0	0	0	0	1	0	0	0	0	0	1
ENSG00000253206.1,RP11-738G5.2.1,coding,chr8:50611497-50629526	NA	ENSG00000223623.1,RP3-425P12.1.1,lncRNA,chr6:25161833-25165280	ENSG00000237480.1,RP5-947P14.1.1,lncRNA,chr1:106417391-106428644	ENSG00000221410.1,MIR1238,miRNA,chr19:10523797-10523880	NA	0	0	0	0	0	0	0	0	0	0	0	0	0	0
ENSG00000259680.2,AC136428.1.1,coding,chr16:33554544-33555426	NA	ENSG00000223623.1,RP3-425P12.1.1,lncRNA,chr6:25161833-25165280	ENSG00000237480.1,RP5-947P14.1.1,lncRNA,chr1:106417391-106428644	ENSG00000221410.1,MIR1238,miRNA,chr19:10523797-10523880	NA	0	0	0	0	0	0	0	0	0	0	0	0	0	0
ENSG00000182783.3,OR2T29,coding,chr1:246788406-246789420	NA	ENSG00000223623.1,RP3-425P12.1.1,lncRNA,chr6:25161833-25165280	ENSG00000237480.1,RP5-947P14.1.1,lncRNA,chr1:106417391-106428644	ENSG00000221410.1,MIR1238,miRNA,chr19:10523797-10523880	NA	0	0	0	0	0	0	0	0	0	0	0	0	0	0
ENSG00000150261.2,OR8K1,coding,chr11:55869996-55871083	NA	ENSG00000223623.1,RP3-425P12.1.1,lncRNA,chr6:25161833-25165280	ENSG00000237480.1,RP5-947P14.1.1,lncRNA,chr1:106417391-106428644	ENSG00000221410.1,MIR1238,miRNA,chr19:10523797-10523880	NA	0	0	0	0	0	0	0	0	0	0	0	0	0	0
ENSG00000204933.1,AC005392.1,coding,chr19:48571499-48575116	NA	ENSG00000223623.1,RP3-425P12.1.1,lncRNA,chr6:25161833-25165280	ENSG00000234686.1,AC010971.1.1,lncRNA,chr7:49240278-49264958	ENSG00000221410.1,MIR1238,miRNA,chr19:10523797-10523880	NA	0	0	0	0	0	0	0	0	0	0	0	0	0	0
ENSG00000204933.1,AC005392.1,coding,chr19:48571499-48575116	NA	ENSG00000223623.1,RP3-425P12.1.1,lncRNA,chr6:25161833-25165280	ENSG00000250078.1,RP11-577G20.2.1,lncRNA,chr4:59123086-59126044	ENSG00000221410.1,MIR1238,miRNA,chr19:10523797-10523880	NA	0	0	0	0	0	0	0	0	0	0	0	0	0	0
ENSG00000204933.1,AC005392.1,coding,chr19:48571499-48575116	NA	ENSG00000236634.1,AC016903.1.1,lncRNA,chr2:205043043-205046805	ENSG00000223623.1,RP3-425P12.1.1,lncRNA,chr6:25161833-25165280	ENSG00000221410.1,MIR1238,miRNA,chr19:10523797-10523880	NA	0	0	0	0	0	0	0	0	0	0	0	0	0	0
ENSG00000204933.1,AC005392.1,coding,chr19:48571499-48575116	NA	ENSG00000223623.1,RP3-425P12.1.1,lncRNA,chr6:25161833-25165280	ENSG00000233519.1,RP11-177F11.1.1,lncRNA,chr1:238630593-238631046	ENSG00000221410.1,MIR1238,miRNA,chr19:10523797-10523880	NA	0	0	0	0	0	0	0	0	0	0	0	0	0	0
ENSG00000206536.1,OR5K3,coding,chr3:99592199-99593165	NA	ENSG00000223626.1,RP11-315H15.1.1,lncRNA,chr13:112024881-112033540	ENSG00000223623.1,RP3-425P12.1.1,lncRNA,chr6:25161833-25165280	ENSG00000221410.1,MIR1238,miRNA,chr19:10523797-10523880	NA	0	0	0	0	0	0	0	0	0	0	0	0	0	0
ENSG00000221900.3,POM121L12,coding,chr7:53070828-53072111	NA	ENSG00000223626.1,RP11-315H15.1.1,lncRNA,chr13:112024881-112033540	ENSG00000223623.1,RP3-425P12.1.1,lncRNA,chr6:25161833-25165280	ENSG00000221410.1,MIR1238,miRNA,chr19:10523797-10523880	NA	0	0	0	0	0	0	0	1	0	0	0	0	0	1
ENSG00000253206.1,RP11-738G5.2.1,coding,chr8:50611497-50629526	NA	ENSG00000223626.1,RP11-315H15.1.1,lncRNA,chr13:112024881-112033540	ENSG00000223623.1,RP3-425P12.1.1,lncRNA,chr6:25161833-25165280	ENSG00000221410.1,MIR1238,miRNA,chr19:10523797-10523880	NA	0	0	0	0	0	0	0	0	0	0	0	0	0	0
ENSG00000182783.3,OR2T29,coding,chr1:246788406-246789420	NA	ENSG00000223626.1,RP11-315H15.1.1,lncRNA,chr13:112024881-112033540	ENSG00000223623.1,RP3-425P12.1.1,lncRNA,chr6:25161833-25165280	ENSG00000221410.1,MIR1238,miRNA,chr19:10523797-10523880	NA	0	0	0	0	0	0	0	0	0	0	0	0	0	0
ENSG00000176742.1,OR51V1,coding,chr11:5177540-5178506	NA	ENSG00000223623.1,RP3-425P12.1.1,lncRNA,chr6:25161833-25165280	ENSG00000234686.1,AC010971.1.1,lncRNA,chr7:49240278-49264958	ENSG00000221410.1,MIR1238,miRNA,chr19:10523797-10523880	NA	0	0	0	0	0	0	0	0	0	0	0	0	0	0
ENSG00000176742.1,OR51V1,coding,chr11:5177540-5178506	NA	ENSG00000223623.1,RP3-425P12.1.1,lncRNA,chr6:25161833-25165280	ENSG00000251376.1,CTD-2313F11.2.1,lncRNA,chr5:54386012-54386725	ENSG00000221410.1,MIR1238,miRNA,chr19:10523797-10523880	NA	0	0	0	0	0	0	0	0	0	0	0	0	0	0
ENSG00000176742.1,OR51V1,coding,chr11:5177540-5178506	NA	ENSG00000223623.1,RP3-425P12.1.1,lncRNA,chr6:25161833-25165280	ENSG00000223880.1,RP11-159J2.2.1,lncRNA,chr13:74722616-74724149	ENSG00000221410.1,MIR1238,miRNA,chr19:10523797-10523880	NA	0	0	0	0	0	0	0	0	0	0	0	0	0	0
ENSG00000176742.1,OR51V1,coding,chr11:5177540-5178506	ENSG00000150261.2,OR8K1,coding,chr11:55869996-55871083	ENSG00000223623.1,RP3-425P12.1.1,lncRNA,chr6:25161833-25165280	NA	ENSG00000221410.1,MIR1238,miRNA,chr19:10523797-10523880	NA	0	0	0	0	0	0	0	0	0	0	0	0	0	0
ENSG00000176742.1,OR51V1,coding,chr11:5177540-5178506	NA	ENSG00000236634.1,AC016903.1.1,lncRNA,chr2:205043043-205046805	ENSG00000223623.1,RP3-425P12.1.1,lncRNA,chr6:25161833-25165280	ENSG00000221410.1,MIR1238,miRNA,chr19:10523797-10523880	NA	0	0	0	0	0	0	0	0	0	0	0	0	0	0
ENSG00000176742.1,OR51V1,coding,chr11:5177540-5178506	NA	ENSG00000223623.1,RP3-425P12.1.1,lncRNA,chr6:25161833-25165280	ENSG00000233519.1,RP11-177F11.1.1,lncRNA,chr1:238630593-238631046	ENSG00000221410.1,MIR1238,miRNA,chr19:10523797-10523880	NA	0	0	0	0	0	0	0	0	0	0	0	0	0	0
ENSG00000150261.2,OR8K1,coding,chr11:55869996-55871083	NA	ENSG00000223623.1,RP3-425P12.1.1,lncRNA,chr6:25161833-25165280	ENSG00000236436.1,AC012361.1.1,lncRNA,chr2:20923011-20924902	ENSG00000221410.1,MIR1238,miRNA,chr19:10523797-10523880	NA	0	0	0	0	0	0	0	0	0	0	0	0	0	0
ENSG00000206536.1,OR5K3,coding,chr3:99592199-99593165	NA	ENSG00000223623.1,RP3-425P12.1.1,lncRNA,chr6:25161833-25165280	ENSG00000234686.1,AC010971.1.1,lncRNA,chr7:49240278-49264958	ENSG00000221410.1,MIR1238,miRNA,chr19:10523797-10523880	NA	0	0	0	0	0	0	0	0	0	0	0	0	0	0
ENSG00000221900.3,POM121L12,coding,chr7:53070828-53072111	NA	ENSG00000223623.1,RP3-425P12.1.1,lncRNA,chr6:25161833-25165280	ENSG00000234686.1,AC010971.1.1,lncRNA,chr7:49240278-49264958	ENSG00000221410.1,MIR1238,miRNA,chr19:10523797-10523880	NA	0	0	0	0	0	0	0	1	0	0	0	0	0	1
ENSG00000253206.1,RP11-738G5.2.1,coding,chr8:50611497-50629526	NA	ENSG00000223623.1,RP3-425P12.1.1,lncRNA,chr6:25161833-25165280	ENSG00000234686.1,AC010971.1.1,lncRNA,chr7:49240278-49264958	ENSG00000221410.1,MIR1238,miRNA,chr19:10523797-10523880	NA	0	0	0	0	0	0	0	0	0	0	0	0	0	0
ENSG00000259680.2,AC136428.1.1,coding,chr16:33554544-33555426	NA	ENSG00000223623.1,RP3-425P12.1.1,lncRNA,chr6:25161833-25165280	ENSG00000234686.1,AC010971.1.1,lncRNA,chr7:49240278-49264958	ENSG00000221410.1,MIR1238,miRNA,chr19:10523797-10523880	NA	0	0	0	0	0	0	0	0	0	0	0	0	0	0
ENSG00000150261.2,OR8K1,coding,chr11:55869996-55871083	NA	ENSG00000223623.1,RP3-425P12.1.1,lncRNA,chr6:25161833-25165280	ENSG00000234686.1,AC010971.1.1,lncRNA,chr7:49240278-49264958	ENSG00000221410.1,MIR1238,miRNA,chr19:10523797-10523880	NA	0	0	0	0	0	0	0	0	0	0	0	0	0	0
ENSG00000253206.1,RP11-738G5.2.1,coding,chr8:50611497-50629526	NA	ENSG00000223623.1,RP3-425P12.1.1,lncRNA,chr6:25161833-25165280	ENSG00000250078.1,RP11-577G20.2.1,lncRNA,chr4:59123086-59126044	ENSG00000221410.1,MIR1238,miRNA,chr19:10523797-10523880	NA	0	0	0	0	0	0	0	0	0	0	0	0	0	0
ENSG00000259680.2,AC136428.1.1,coding,chr16:33554544-33555426	NA	ENSG00000223623.1,RP3-425P12.1.1,lncRNA,chr6:25161833-25165280	ENSG00000250078.1,RP11-577G20.2.1,lncRNA,chr4:59123086-59126044	ENSG00000221410.1,MIR1238,miRNA,chr19:10523797-10523880	NA	0	0	0	0	0	0	0	0	0	0	0	0	0	0
ENSG00000206536.1,OR5K3,coding,chr3:99592199-99593165	NA	ENSG00000236634.1,AC016903.1.1,lncRNA,chr2:205043043-205046805	ENSG00000223623.1,RP3-425P12.1.1,lncRNA,chr6:25161833-25165280	ENSG00000221410.1,MIR1238,miRNA,chr19:10523797-10523880	NA	0	0	0	0	0	0	0	0	0	0	0	0	0	0
ENSG00000206536.1,OR5K3,coding,chr3:99592199-99593165	NA	ENSG00000223623.1,RP3-425P12.1.1,lncRNA,chr6:25161833-25165280	ENSG00000233519.1,RP11-177F11.1.1,lncRNA,chr1:238630593-238631046	ENSG00000221410.1,MIR1238,miRNA,chr19:10523797-10523880	NA	0	0	0	0	0	0	0	0	0	0	0	0	0	0
ENSG00000221900.3,POM121L12,coding,chr7:53070828-53072111	NA	ENSG00000236634.1,AC016903.1.1,lncRNA,chr2:205043043-205046805	ENSG00000223623.1,RP3-425P12.1.1,lncRNA,chr6:25161833-25165280	ENSG00000221410.1,MIR1238,miRNA,chr19:10523797-10523880	NA	0	0	0	0	0	0	0	1	0	0	0	0	0	1
ENSG00000221900.3,POM121L12,coding,chr7:53070828-53072111	NA	ENSG00000223623.1,RP3-425P12.1.1,lncRNA,chr6:25161833-25165280	ENSG00000233519.1,RP11-177F11.1.1,lncRNA,chr1:238630593-238631046	ENSG00000221410.1,MIR1238,miRNA,chr19:10523797-10523880	NA	0	0	0	0	0	0	0	1	0	0	0	0	0	1
ENSG00000253206.1,RP11-738G5.2.1,coding,chr8:50611497-50629526	NA	ENSG00000236634.1,AC016903.1.1,lncRNA,chr2:205043043-205046805	ENSG00000223623.1,RP3-425P12.1.1,lncRNA,chr6:25161833-25165280	ENSG00000221410.1,MIR1238,miRNA,chr19:10523797-10523880	NA	0	0	0	0	0	0	0	0	0	0	0	0	0	0
ENSG00000253206.1,RP11-738G5.2.1,coding,chr8:50611497-50629526	NA	ENSG00000223623.1,RP3-425P12.1.1,lncRNA,chr6:25161833-25165280	ENSG00000233519.1,RP11-177F11.1.1,lncRNA,chr1:238630593-238631046	ENSG00000221410.1,MIR1238,miRNA,chr19:10523797-10523880	NA	0	0	0	0	0	0	0	0	0	0	0	0	0	0
ENSG00000259680.2,AC136428.1.1,coding,chr16:33554544-33555426	NA	ENSG00000236634.1,AC016903.1.1,lncRNA,chr2:205043043-205046805	ENSG00000223623.1,RP3-425P12.1.1,lncRNA,chr6:25161833-25165280	ENSG00000221410.1,MIR1238,miRNA,chr19:10523797-10523880	NA	0	0	0	0	0	0	0	0	0	0	0	0	0	0
ENSG00000259680.2,AC136428.1.1,coding,chr16:33554544-33555426	NA	ENSG00000223623.1,RP3-425P12.1.1,lncRNA,chr6:25161833-25165280	ENSG00000233519.1,RP11-177F11.1.1,lncRNA,chr1:238630593-238631046	ENSG00000221410.1,MIR1238,miRNA,chr19:10523797-10523880	NA	0	0	0	0	0	0	0	0	0	0	0	0	0	0
ENSG00000182783.3,OR2T29,coding,chr1:246788406-246789420	NA	ENSG00000236634.1,AC016903.1.1,lncRNA,chr2:205043043-205046805	ENSG00000223623.1,RP3-425P12.1.1,lncRNA,chr6:25161833-25165280	ENSG00000221410.1,MIR1238,miRNA,chr19:10523797-10523880	NA	0	0	0	0	0	0	0	0	0	0	0	0	0	0
ENSG00000182783.3,OR2T29,coding,chr1:246788406-246789420	NA	ENSG00000223623.1,RP3-425P12.1.1,lncRNA,chr6:25161833-25165280	ENSG00000233519.1,RP11-177F11.1.1,lncRNA,chr1:238630593-238631046	ENSG00000221410.1,MIR1238,miRNA,chr19:10523797-10523880	NA	0	0	0	0	0	0	0	0	0	0	0	0	0	0
ENSG00000150261.2,OR8K1,coding,chr11:55869996-55871083	NA	ENSG00000236634.1,AC016903.1.1,lncRNA,chr2:205043043-205046805	ENSG00000223623.1,RP3-425P12.1.1,lncRNA,chr6:25161833-25165280	ENSG00000221410.1,MIR1238,miRNA,chr19:10523797-10523880	NA	0	0	0	0	0	0	0	0	0	0	0	0	0	0
ENSG00000150261.2,OR8K1,coding,chr11:55869996-55871083	NA	ENSG00000223623.1,RP3-425P12.1.1,lncRNA,chr6:25161833-25165280	ENSG00000233519.1,RP11-177F11.1.1,lncRNA,chr1:238630593-238631046	ENSG00000221410.1,MIR1238,miRNA,chr19:10523797-10523880	NA	0	0	0	0	0	0	0	0	0	0	0	0	0	0
ENSG00000255164.1,RP5-1047A19.4.1,coding,chr8:146189103-146191027	NA	ENSG00000223623.1,RP3-425P12.1.1,lncRNA,chr6:25161833-25165280	ENSG00000248601.1,RP11-310I9.1.1,lncRNA,chr4:169104399-169271057	ENSG00000199036.1,MIR219-1,miRNA,chr6:33283589-33283699	NA	0	0	0	0	0	0	0	0	0	0	0	0	0	0
ENSG00000099721.9,AMELY,coding,chrY:6793958-6802068	NA	ENSG00000232806.1,AP001610.9.1,lncRNA,chr21:41852921-41856755	ENSG00000233519.1,RP11-177F11.1.1,lncRNA,chr1:238630593-238631046	ENSG00000221410.1,MIR1238,miRNA,chr19:10523797-10523880	NA	0	0	0	0	0	0	0	0	0	0	0	0	0	0
ENSG00000186930.3,KRTAP6-2,coding,chr21:30892779-30893090	NA	ENSG00000230051.1,CTA-929C8.8.1,lncRNA,chr22:26057747-26105226	ENSG00000231238.1,LINC00349,lncRNA,chr13:18012636-18022837	ENSG00000221410.1,MIR1238,miRNA,chr19:10523797-10523880	NA	0	0	0	0	0	0	0	0	0	0	0	0	0	0
ENSG00000186930.3,KRTAP6-2,coding,chr21:30892779-30893090	NA	ENSG00000232806.1,AP001610.9.1,lncRNA,chr21:41852921-41856755	ENSG00000231238.1,LINC00349,lncRNA,chr13:18012636-18022837	ENSG00000221410.1,MIR1238,miRNA,chr19:10523797-10523880	NA	0	0	0	0	0	0	0	0	0	0	0	0	0	0
ENSG00000186930.3,KRTAP6-2,coding,chr21:30892779-30893090	NA	ENSG00000234116.1,RP11-261C10.1.1,lncRNA,chr1:241235769-241237393	ENSG00000231238.1,LINC00349,lncRNA,chr13:18012636-18022837	ENSG00000221410.1,MIR1238,miRNA,chr19:10523797-10523880	NA	0	0	0	0	0	0	0	0	0	0	0	0	0	0
ENSG00000186930.3,KRTAP6-2,coding,chr21:30892779-30893090	NA	ENSG00000233519.1,RP11-177F11.1.1,lncRNA,chr1:238630593-238631046	ENSG00000231238.1,LINC00349,lncRNA,chr13:18012636-18022837	ENSG00000221410.1,MIR1238,miRNA,chr19:10523797-10523880	NA	0	0	0	0	0	0	0	0	0	0	0	0	0	0
ENSG00000186930.3,KRTAP6-2,coding,chr21:30892779-30893090	NA	ENSG00000234686.1,AC010971.1.1,lncRNA,chr7:49240278-49264958	ENSG00000231597.1,AC007557.4.1,lncRNA,chr2:217427356-217428100	ENSG00000221410.1,MIR1238,miRNA,chr19:10523797-10523880	NA	0	0	0	0	0	0	0	0	0	0	0	0	0	0
ENSG00000186930.3,KRTAP6-2,coding,chr21:30892779-30893090	NA	ENSG00000233519.1,RP11-177F11.1.1,lncRNA,chr1:238630593-238631046	ENSG00000234686.1,AC010971.1.1,lncRNA,chr7:49240278-49264958	ENSG00000221410.1,MIR1238,miRNA,chr19:10523797-10523880	NA	0	0	0	0	0	0	0	0	0	0	0	0	0	0
ENSG00000186930.3,KRTAP6-2,coding,chr21:30892779-30893090	NA	ENSG00000233519.1,RP11-177F11.1.1,lncRNA,chr1:238630593-238631046	ENSG00000231597.1,AC007557.4.1,lncRNA,chr2:217427356-217428100	ENSG00000221410.1,MIR1238,miRNA,chr19:10523797-10523880	NA	0	0	0	0	0	0	0	0	0	0	0	0	0	0
ENSG00000186930.3,KRTAP6-2,coding,chr21:30892779-30893090	NA	ENSG00000232806.1,AP001610.9.1,lncRNA,chr21:41852921-41856755	ENSG00000233519.1,RP11-177F11.1.1,lncRNA,chr1:238630593-238631046	ENSG00000221410.1,MIR1238,miRNA,chr19:10523797-10523880	NA	0	0	0	0	0	0	0	0	0	0	0	0	0	0
ENSG00000244624.2,KRTAP20-1,coding,chr21:30910620-30910874	NA	ENSG00000236828.1,DMD-AS3,lncRNA,chrX:32682977-32684438	NA	ENSG00000207602.1,MIR106A,miRNA,chrX:133131893-133131974	ENSG00000221287.1,MIR1289-2,miRNA,chr5:132791186-132791297	0	0	0	0	0	0	0	0	0	0	0	0	0	0
ENSG00000000003.9,TSPAN6,coding,chrX:99770322-99781644	ENSG00000255639.1,RP11-234B24.6.1,coding,chr12:4637060-4724008	ENSG00000255028.1,RP11-708B6.2.1,lncRNA,chr11:108731021-108959843	NA	ENSG00000207602.1,MIR106A,miRNA,chrX:133131893-133131974	NA	0	0	0	0	0	0	0	0	0	0	0	0	0	0
ENSG00000149133.1,OR5F1,coding,chr11:55517732-55518677	NA	ENSG00000243349.1,RP11-445N18.7.1,lncRNA,chr10:44962847-44965179	ENSG00000228027.1,RP1-251M9.3.1,lncRNA,chr10:11092132-11093088	ENSG00000207728.1,MIR449B,miRNA,chr5:54502230-54502327	NA	0	0	0	0	0	0	0	0	0	0	0	0	0	0
ENSG00000149133.1,OR5F1,coding,chr11:55517732-55518677	NA	ENSG00000243349.1,RP11-445N18.7.1,lncRNA,chr10:44962847-44965179	ENSG00000230051.1,CTA-929C8.8.1,lncRNA,chr22:26057747-26105226	ENSG00000207728.1,MIR449B,miRNA,chr5:54502230-54502327	NA	0	0	0	0	0	0	0	0	0	0	0	0	0	0
ENSG00000259164.1,RP11-463C8.4.1,coding,chr14:76634406-76761558	NA	ENSG00000257470.1,RP11-397H6.1.1,lncRNA,chr12:95941929-95969038	ENSG00000255245.1,RP11-728F11.6.1,lncRNA,chr11:117196087-117252592	ENSG00000207726.1,MIR455,miRNA,chr9:116011534-116011630	NA	0	0	0	0	0	0	0	0	0	0	0	0	0	0
ENSG00000259164.1,RP11-463C8.4.1,coding,chr14:76634406-76761558	NA	ENSG00000258747.1,RP11-163M18.1.1,lncRNA,chr14:44046359-44077466	ENSG00000255245.1,RP11-728F11.6.1,lncRNA,chr11:117196087-117252592	ENSG00000207726.1,MIR455,miRNA,chr9:116011534-116011630	NA	0	0	0	0	0	0	0	0	0	0	0	0	0	0
ENSG00000214819.1,CDRT15L2,coding,chr17:20423628-20424816	NA	ENSG00000249513.2,RP11-404I7.1.1,lncRNA,chr4:134126114-134129282	ENSG00000230720.1,RP11-14C22.6.1,lncRNA,chr10:31052185-31052675	ENSG00000199187.1,MIR365B,miRNA,chr17:26926542-26926653	NA	0	0	0	0	0	0	0	0	0	0	0	0	0	0
ENSG00000206106.2,KRTAP22-2,coding,chr21:30884294-30884587	NA	ENSG00000249513.2,RP11-404I7.1.1,lncRNA,chr4:134126114-134129282	ENSG00000230720.1,RP11-14C22.6.1,lncRNA,chr10:31052185-31052675	ENSG00000199187.1,MIR365B,miRNA,chr17:26926542-26926653	NA	0	0	0	0	0	0	0	0	0	0	0	0	0	0
ENSG00000206106.2,KRTAP22-2,coding,chr21:30884294-30884587	NA	ENSG00000249513.2,RP11-404I7.1.1,lncRNA,chr4:134126114-134129282	ENSG00000248799.1,CTC-548H10.2.1,lncRNA,chr5:127015283-127027620	ENSG00000199187.1,MIR365B,miRNA,chr17:26926542-26926653	NA	0	0	0	0	0	0	0	0	0	0	0	0	0	0
ENSG00000214819.1,CDRT15L2,coding,chr17:20423628-20424816	ENSG00000206106.2,KRTAP22-2,coding,chr21:30884294-30884587	ENSG00000249513.2,RP11-404I7.1.1,lncRNA,chr4:134126114-134129282	NA	ENSG00000199187.1,MIR365B,miRNA,chr17:26926542-26926653	NA	0	0	0	0	0	0	0	0	0	0	0	0	0	0
ENSG00000206106.2,KRTAP22-2,coding,chr21:30884294-30884587	NA	ENSG00000249513.2,RP11-404I7.1.1,lncRNA,chr4:134126114-134129282	NA	ENSG00000199187.1,MIR365B,miRNA,chr17:26926542-26926653	ENSG00000207597.1,MIR490,miRNA,chr7:136238453-136238581	0	0	0	0	0	0	0	0	0	0	0	0	0	0
ENSG00000183054.6,RGPD6,coding,chr2:110705925-111051231	NA	ENSG00000249513.2,RP11-404I7.1.1,lncRNA,chr4:134126114-134129282	NA	ENSG00000199187.1,MIR365B,miRNA,chr17:26926542-26926653	ENSG00000207597.1,MIR490,miRNA,chr7:136238453-136238581	0	0	0	0	0	0	0	0	0	0	0	0	0	0
ENSG00000258582.1,RP11-44L9.1.1,coding,chr16:72074716-72079144	NA	ENSG00000231200.1,AC068490.2.1,lncRNA,chr2:22009712-22607482	NA	ENSG00000208033.1,MIR609,miRNA,chr10:105968536-105968631	ENSG00000251856.1,MIR449C,miRNA,chr5:54503846-54503938	0	0	0	0	0	0	0	0	0	0	0	0	0	0
ENSG00000258582.1,RP11-44L9.1.1,coding,chr16:72074716-72079144	NA	ENSG00000231200.1,AC068490.2.1,lncRNA,chr2:22009712-22607482	NA	ENSG00000208033.1,MIR609,miRNA,chr10:105968536-105968631	ENSG00000207613.1,MIR181C,miRNA,chr19:13846512-13846622	0	0	0	0	0	0	0	0	0	0	0	0	0	0
ENSG00000258582.1,RP11-44L9.1.1,coding,chr16:72074716-72079144	ENSG00000186146.1,DEFB131,coding,chr4:9055357-9061338	ENSG00000231200.1,AC068490.2.1,lncRNA,chr2:22009712-22607482	NA	ENSG00000208033.1,MIR609,miRNA,chr10:105968536-105968631	NA	0	0	0	0	0	0	0	0	0	0	0	0	0	0
ENSG00000258582.1,RP11-44L9.1.1,coding,chr16:72074716-72079144	NA	ENSG00000231200.1,AC068490.2.1,lncRNA,chr2:22009712-22607482	NA	ENSG00000251856.1,MIR449C,miRNA,chr5:54503846-54503938	ENSG00000207613.1,MIR181C,miRNA,chr19:13846512-13846622	0	0	0	0	0	0	0	0	0	0	0	0	0	0
ENSG00000258582.1,RP11-44L9.1.1,coding,chr16:72074716-72079144	NA	ENSG00000258747.1,RP11-163M18.1.1,lncRNA,chr14:44046359-44077466	ENSG00000231200.1,AC068490.2.1,lncRNA,chr2:22009712-22607482	ENSG00000251856.1,MIR449C,miRNA,chr5:54503846-54503938	NA	0	0	0	0	0	0	0	0	0	0	0	0	0	0
ENSG00000258582.1,RP11-44L9.1.1,coding,chr16:72074716-72079144	ENSG00000186146.1,DEFB131,coding,chr4:9055357-9061338	ENSG00000231200.1,AC068490.2.1,lncRNA,chr2:22009712-22607482	NA	ENSG00000251856.1,MIR449C,miRNA,chr5:54503846-54503938	NA	0	0	0	0	0	0	0	0	0	0	0	0	0	0
ENSG00000258582.1,RP11-44L9.1.1,coding,chr16:72074716-72079144	NA	ENSG00000231200.1,AC068490.2.1,lncRNA,chr2:22009712-22607482	ENSG00000224027.1,RP1-231P7P.1.1,lncRNA,chr22:26289799-26299534	ENSG00000251856.1,MIR449C,miRNA,chr5:54503846-54503938	NA	0	0	0	0	0	0	0	0	0	0	1	0	0	1
ENSG00000258582.1,RP11-44L9.1.1,coding,chr16:72074716-72079144	NA	ENSG00000250831.1,CTD-2232E5.2.1,lncRNA,chr5:88798109-88801612	ENSG00000231200.1,AC068490.2.1,lncRNA,chr2:22009712-22607482	ENSG00000251856.1,MIR449C,miRNA,chr5:54503846-54503938	NA	0	0	0	0	0	0	0	0	0	0	0	0	0	0
ENSG00000259164.1,RP11-463C8.4.1,coding,chr14:76634406-76761558	ENSG00000258582.1,RP11-44L9.1.1,coding,chr16:72074716-72079144	ENSG00000231200.1,AC068490.2.1,lncRNA,chr2:22009712-22607482	NA	ENSG00000251856.1,MIR449C,miRNA,chr5:54503846-54503938	NA	0	0	0	0	0	0	0	0	0	0	0	0	0	0
ENSG00000258582.1,RP11-44L9.1.1,coding,chr16:72074716-72079144	NA	ENSG00000258747.1,RP11-163M18.1.1,lncRNA,chr14:44046359-44077466	ENSG00000231200.1,AC068490.2.1,lncRNA,chr2:22009712-22607482	ENSG00000207613.1,MIR181C,miRNA,chr19:13846512-13846622	NA	0	0	0	0	0	0	0	0	0	0	0	0	0	0
ENSG00000258582.1,RP11-44L9.1.1,coding,chr16:72074716-72079144	ENSG00000186146.1,DEFB131,coding,chr4:9055357-9061338	ENSG00000231200.1,AC068490.2.1,lncRNA,chr2:22009712-22607482	NA	ENSG00000207613.1,MIR181C,miRNA,chr19:13846512-13846622	NA	0	0	0	0	0	0	0	0	0	0	0	0	0	0
ENSG00000258582.1,RP11-44L9.1.1,coding,chr16:72074716-72079144	NA	ENSG00000250831.1,CTD-2232E5.2.1,lncRNA,chr5:88798109-88801612	ENSG00000231200.1,AC068490.2.1,lncRNA,chr2:22009712-22607482	ENSG00000207613.1,MIR181C,miRNA,chr19:13846512-13846622	NA	0	0	0	0	0	0	0	0	0	0	0	0	0	0
ENSG00000259164.1,RP11-463C8.4.1,coding,chr14:76634406-76761558	ENSG00000258582.1,RP11-44L9.1.1,coding,chr16:72074716-72079144	ENSG00000231200.1,AC068490.2.1,lncRNA,chr2:22009712-22607482	NA	ENSG00000207613.1,MIR181C,miRNA,chr19:13846512-13846622	NA	0	0	0	0	0	0	0	0	0	0	0	0	0	0
ENSG00000258582.1,RP11-44L9.1.1,coding,chr16:72074716-72079144	NA	ENSG00000250831.1,CTD-2232E5.2.1,lncRNA,chr5:88798109-88801612	ENSG00000253634.1,RP11-587H10.2.1,lncRNA,chr8:93646846-93736898	ENSG00000207613.1,MIR181C,miRNA,chr19:13846512-13846622	NA	0	0	0	0	0	0	0	0	0	0	0	0	0	0
ENSG00000258582.1,RP11-44L9.1.1,coding,chr16:72074716-72079144	NA	ENSG00000258747.1,RP11-163M18.1.1,lncRNA,chr14:44046359-44077466	NA	ENSG00000251856.1,MIR449C,miRNA,chr5:54503846-54503938	ENSG00000207613.1,MIR181C,miRNA,chr19:13846512-13846622	0	0	0	0	0	0	0	0	0	0	0	0	0	0
ENSG00000258582.1,RP11-44L9.1.1,coding,chr16:72074716-72079144	NA	ENSG00000250905.1,RP11-707F2.1.1,lncRNA,chr4:150806658-150851751	NA	ENSG00000251856.1,MIR449C,miRNA,chr5:54503846-54503938	ENSG00000207613.1,MIR181C,miRNA,chr19:13846512-13846622	0	0	0	0	0	0	0	0	0	0	0	0	0	0
ENSG00000258582.1,RP11-44L9.1.1,coding,chr16:72074716-72079144	NA	ENSG00000250831.1,CTD-2232E5.2.1,lncRNA,chr5:88798109-88801612	NA	ENSG00000251856.1,MIR449C,miRNA,chr5:54503846-54503938	ENSG00000207613.1,MIR181C,miRNA,chr19:13846512-13846622	0	0	0	0	0	0	0	0	0	0	0	0	0	0
ENSG00000259164.1,RP11-463C8.4.1,coding,chr14:76634406-76761558	ENSG00000258582.1,RP11-44L9.1.1,coding,chr16:72074716-72079144	ENSG00000258747.1,RP11-163M18.1.1,lncRNA,chr14:44046359-44077466	NA	ENSG00000251856.1,MIR449C,miRNA,chr5:54503846-54503938	NA	0	0	0	0	0	0	0	0	0	0	0	0	0	0
ENSG00000259164.1,RP11-463C8.4.1,coding,chr14:76634406-76761558	ENSG00000258582.1,RP11-44L9.1.1,coding,chr16:72074716-72079144	ENSG00000258747.1,RP11-163M18.1.1,lncRNA,chr14:44046359-44077466	NA	ENSG00000207613.1,MIR181C,miRNA,chr19:13846512-13846622	NA	0	0	0	0	0	0	0	0	0	0	0	0	0	0
ENSG00000261717.1,RP11-77K12.1.1,coding,chr16:74004082-74056105	ENSG00000181803.3,OR6S1,coding,chr14:20178694-20179690	ENSG00000253561.1,CTD-2588J1.1.1,lncRNA,chr8:134852833-134895962	NA	ENSG00000208018.1,MIR645,miRNA,chr20:48635729-48635823	NA	0	0	0	0	0	0	0	0	0	0	0	0	0	0
ENSG00000261717.1,RP11-77K12.1.1,coding,chr16:74004082-74056105	ENSG00000204823.3,AC008676.1,coding,chr5:156735326-156744525	ENSG00000253561.1,CTD-2588J1.1.1,lncRNA,chr8:134852833-134895962	NA	ENSG00000208018.1,MIR645,miRNA,chr20:48635729-48635823	NA	0	0	0	0	0	0	0	0	0	0	0	0	0	0
ENSG00000244624.2,KRTAP20-1,coding,chr21:30910620-30910874	NA	ENSG00000253561.1,CTD-2588J1.1.1,lncRNA,chr8:134852833-134895962	NA	ENSG00000208033.1,MIR609,miRNA,chr10:105968536-105968631	ENSG00000207613.1,MIR181C,miRNA,chr19:13846512-13846622	0	0	0	0	0	0	0	0	0	0	0	0	0	0
ENSG00000244624.2,KRTAP20-1,coding,chr21:30910620-30910874	NA	ENSG00000236828.1,DMD-AS3,lncRNA,chrX:32682977-32684438	ENSG00000253561.1,CTD-2588J1.1.1,lncRNA,chr8:134852833-134895962	ENSG00000208033.1,MIR609,miRNA,chr10:105968536-105968631	NA	0	0	0	0	0	0	0	0	0	0	0	0	0	0
ENSG00000244624.2,KRTAP20-1,coding,chr21:30910620-30910874	NA	ENSG00000253561.1,CTD-2588J1.1.1,lncRNA,chr8:134852833-134895962	ENSG00000249808.1,CTD-2029E14.1.1,lncRNA,chr5:3231208-3234346	ENSG00000208033.1,MIR609,miRNA,chr10:105968536-105968631	NA	0	0	0	0	0	0	0	0	0	0	1	0	0	1
ENSG00000244624.2,KRTAP20-1,coding,chr21:30910620-30910874	NA	ENSG00000249747.1,RP11-308K2.1.1,lncRNA,chr4:188360133-188367494	ENSG00000253561.1,CTD-2588J1.1.1,lncRNA,chr8:134852833-134895962	ENSG00000208033.1,MIR609,miRNA,chr10:105968536-105968631	NA	0	0	0	0	0	0	0	0	0	1	0	0	0	1
ENSG00000197428.2,OR51D1,coding,chr11:4617520-4618644	NA	ENSG00000231791.1,RP11-382D12.1.1,lncRNA,chr1:182564827-182568583	ENSG00000254434.1,CTD-2555I5.1.1,lncRNA,chr11:79710311-79716603	ENSG00000207583.1,MIR606,miRNA,chr10:76982221-76982317	NA	0	0	0	0	0	0	0	0	0	0	0	0	0	0
ENSG00000214819.1,CDRT15L2,coding,chr17:20423628-20424816	NA	ENSG00000224932.1,AC107399.2.1,lncRNA,chr4:118455200-118501243	ENSG00000236356.1,AC079584.2.1,lncRNA,chr2:144273505-144293638	ENSG00000207944.1,MIR574,miRNA,chr4:38546047-38546143	NA	0	0	0	0	0	0	0	0	0	0	0	0	0	0
ENSG00000186967.6,KRTAP19-4,coding,chr21:30791012-30791322	NA	ENSG00000224932.1,AC107399.2.1,lncRNA,chr4:118455200-118501243	ENSG00000236356.1,AC079584.2.1,lncRNA,chr2:144273505-144293638	ENSG00000207944.1,MIR574,miRNA,chr4:38546047-38546143	NA	0	0	0	0	0	0	0	0	0	0	0	0	0	0
ENSG00000214819.1,CDRT15L2,coding,chr17:20423628-20424816	ENSG00000186967.6,KRTAP19-4,coding,chr21:30791012-30791322	ENSG00000236356.1,AC079584.2.1,lncRNA,chr2:144273505-144293638	NA	ENSG00000207944.1,MIR574,miRNA,chr4:38546047-38546143	NA	0	0	0	0	0	0	0	0	0	0	0	0	0	0
ENSG00000214819.1,CDRT15L2,coding,chr17:20423628-20424816	NA	ENSG00000233519.1,RP11-177F11.1.1,lncRNA,chr1:238630593-238631046	ENSG00000236356.1,AC079584.2.1,lncRNA,chr2:144273505-144293638	ENSG00000207944.1,MIR574,miRNA,chr4:38546047-38546143	NA	0	0	0	0	0	0	0	0	0	0	0	0	0	0
ENSG00000203852.3,HIST2H3A,coding,chr1:148090804-148092460	ENSG00000186599.7,DEFB105B,coding,chr8:7332600-7334525	ENSG00000230051.1,CTA-929C8.8.1,lncRNA,chr22:26057747-26105226	NA	ENSG00000221410.1,MIR1238,miRNA,chr19:10523797-10523880	NA	0	0	0	0	0	0	0	0	0	0	0	0	0	0
ENSG00000203852.3,HIST2H3A,coding,chr1:148090804-148092460	ENSG00000186599.7,DEFB105B,coding,chr8:7332600-7334525	ENSG00000232806.1,AP001610.9.1,lncRNA,chr21:41852921-41856755	NA	ENSG00000221410.1,MIR1238,miRNA,chr19:10523797-10523880	NA	0	0	0	0	0	0	0	0	0	0	0	0	0	0
ENSG00000203852.3,HIST2H3A,coding,chr1:148090804-148092460	ENSG00000186599.7,DEFB105B,coding,chr8:7332600-7334525	ENSG00000234116.1,RP11-261C10.1.1,lncRNA,chr1:241235769-241237393	NA	ENSG00000221410.1,MIR1238,miRNA,chr19:10523797-10523880	NA	0	0	0	0	0	0	0	0	0	0	0	0	0	0
ENSG00000203852.3,HIST2H3A,coding,chr1:148090804-148092460	ENSG00000186599.7,DEFB105B,coding,chr8:7332600-7334525	ENSG00000233519.1,RP11-177F11.1.1,lncRNA,chr1:238630593-238631046	NA	ENSG00000221410.1,MIR1238,miRNA,chr19:10523797-10523880	NA	0	0	0	0	0	0	0	0	0	0	0	0	0	0
ENSG00000186599.7,DEFB105B,coding,chr8:7332600-7334525	NA	ENSG00000249343.1,CTD-2275D24.2.1,lncRNA,chr5:73654066-73659878	ENSG00000248942.1,CTD-2275D24.4.1,lncRNA,chr5:73637990-73639906	ENSG00000253030.1,MIR2116,miRNA,chr15:57250673-57250753	NA	0	0	0	0	0	0	0	0	0	0	0	0	0	0
ENSG00000186599.7,DEFB105B,coding,chr8:7332600-7334525	NA	ENSG00000249343.1,CTD-2275D24.2.1,lncRNA,chr5:73654066-73659878	ENSG00000231597.1,AC007557.4.1,lncRNA,chr2:217427356-217428100	ENSG00000253030.1,MIR2116,miRNA,chr15:57250673-57250753	NA	0	0	0	0	0	0	0	0	0	0	0	0	0	0
ENSG00000186599.7,DEFB105B,coding,chr8:7332600-7334525	NA	ENSG00000248942.1,CTD-2275D24.4.1,lncRNA,chr5:73637990-73639906	ENSG00000231597.1,AC007557.4.1,lncRNA,chr2:217427356-217428100	ENSG00000253030.1,MIR2116,miRNA,chr15:57250673-57250753	NA	0	0	0	0	0	0	0	0	0	0	0	0	0	0
ENSG00000186599.7,DEFB105B,coding,chr8:7332600-7334525	NA	ENSG00000234686.1,AC010971.1.1,lncRNA,chr7:49240278-49264958	ENSG00000231597.1,AC007557.4.1,lncRNA,chr2:217427356-217428100	ENSG00000253030.1,MIR2116,miRNA,chr15:57250673-57250753	NA	0	0	0	0	0	0	0	0	0	0	0	0	0	0
ENSG00000186599.7,DEFB105B,coding,chr8:7332600-7334525	NA	ENSG00000236828.1,DMD-AS3,lncRNA,chrX:32682977-32684438	ENSG00000234686.1,AC010971.1.1,lncRNA,chr7:49240278-49264958	ENSG00000253030.1,MIR2116,miRNA,chr15:57250673-57250753	NA	0	0	0	0	0	0	0	0	0	0	0	0	0	0
ENSG00000186599.7,DEFB105B,coding,chr8:7332600-7334525	NA	ENSG00000249880.1,RP11-432G16.1.1,lncRNA,chr5:95886726-95907978	ENSG00000234686.1,AC010971.1.1,lncRNA,chr7:49240278-49264958	ENSG00000253030.1,MIR2116,miRNA,chr15:57250673-57250753	NA	0	0	0	0	0	0	0	0	0	0	0	0	0	0
ENSG00000186599.7,DEFB105B,coding,chr8:7332600-7334525	NA	ENSG00000250902.1,RP11-301H24.4.1,lncRNA,chr4:146655216-146657720	ENSG00000234686.1,AC010971.1.1,lncRNA,chr7:49240278-49264958	ENSG00000253030.1,MIR2116,miRNA,chr15:57250673-57250753	NA	0	0	0	0	0	0	0	0	0	0	0	0	0	0
ENSG00000244624.2,KRTAP20-1,coding,chr21:30910620-30910874	ENSG00000186599.7,DEFB105B,coding,chr8:7332600-7334525	ENSG00000234686.1,AC010971.1.1,lncRNA,chr7:49240278-49264958	NA	ENSG00000253030.1,MIR2116,miRNA,chr15:57250673-57250753	NA	0	0	0	0	0	0	0	0	0	0	0	0	0	0
ENSG00000186599.7,DEFB105B,coding,chr8:7332600-7334525	NA	ENSG00000233519.1,RP11-177F11.1.1,lncRNA,chr1:238630593-238631046	ENSG00000234686.1,AC010971.1.1,lncRNA,chr7:49240278-49264958	ENSG00000253030.1,MIR2116,miRNA,chr15:57250673-57250753	NA	0	0	0	0	0	0	0	0	0	0	0	0	0	0
ENSG00000186599.7,DEFB105B,coding,chr8:7332600-7334525	NA	ENSG00000230051.1,CTA-929C8.8.1,lncRNA,chr22:26057747-26105226	ENSG00000250902.1,RP11-301H24.4.1,lncRNA,chr4:146655216-146657720	ENSG00000253030.1,MIR2116,miRNA,chr15:57250673-57250753	NA	0	0	0	0	0	0	0	0	0	0	0	0	0	0
ENSG00000186599.7,DEFB105B,coding,chr8:7332600-7334525	NA	ENSG00000250902.1,RP11-301H24.4.1,lncRNA,chr4:146655216-146657720	ENSG00000231597.1,AC007557.4.1,lncRNA,chr2:217427356-217428100	ENSG00000253030.1,MIR2116,miRNA,chr15:57250673-57250753	NA	0	0	0	0	0	0	0	0	0	0	0	0	0	0
ENSG00000244624.2,KRTAP20-1,coding,chr21:30910620-30910874	ENSG00000186599.7,DEFB105B,coding,chr8:7332600-7334525	ENSG00000231597.1,AC007557.4.1,lncRNA,chr2:217427356-217428100	NA	ENSG00000253030.1,MIR2116,miRNA,chr15:57250673-57250753	NA	0	0	0	0	0	0	0	0	0	0	0	0	0	0
ENSG00000186599.7,DEFB105B,coding,chr8:7332600-7334525	NA	ENSG00000233519.1,RP11-177F11.1.1,lncRNA,chr1:238630593-238631046	ENSG00000231597.1,AC007557.4.1,lncRNA,chr2:217427356-217428100	ENSG00000253030.1,MIR2116,miRNA,chr15:57250673-57250753	NA	0	0	0	0	0	0	0	0	0	0	0	0	0	0
ENSG00000186599.7,DEFB105B,coding,chr8:7332600-7334525	NA	ENSG00000232806.1,AP001610.9.1,lncRNA,chr21:41852921-41856755	ENSG00000250902.1,RP11-301H24.4.1,lncRNA,chr4:146655216-146657720	ENSG00000253030.1,MIR2116,miRNA,chr15:57250673-57250753	NA	0	0	0	0	0	0	0	0	0	0	0	0	0	0
ENSG00000186599.7,DEFB105B,coding,chr8:7332600-7334525	NA	ENSG00000232806.1,AP001610.9.1,lncRNA,chr21:41852921-41856755	ENSG00000233519.1,RP11-177F11.1.1,lncRNA,chr1:238630593-238631046	ENSG00000253030.1,MIR2116,miRNA,chr15:57250673-57250753	NA	0	0	0	0	0	0	0	0	0	0	0	0	0	0
ENSG00000186599.7,DEFB105B,coding,chr8:7332600-7334525	NA	ENSG00000236828.1,DMD-AS3,lncRNA,chrX:32682977-32684438	ENSG00000250902.1,RP11-301H24.4.1,lncRNA,chr4:146655216-146657720	ENSG00000253030.1,MIR2116,miRNA,chr15:57250673-57250753	NA	0	0	0	0	0	0	0	0	0	0	0	0	0	0
ENSG00000244624.2,KRTAP20-1,coding,chr21:30910620-30910874	ENSG00000186599.7,DEFB105B,coding,chr8:7332600-7334525	ENSG00000236828.1,DMD-AS3,lncRNA,chrX:32682977-32684438	NA	ENSG00000253030.1,MIR2116,miRNA,chr15:57250673-57250753	NA	0	0	0	0	0	0	0	0	0	0	0	0	0	0
ENSG00000186599.7,DEFB105B,coding,chr8:7332600-7334525	NA	ENSG00000236828.1,DMD-AS3,lncRNA,chrX:32682977-32684438	ENSG00000233519.1,RP11-177F11.1.1,lncRNA,chr1:238630593-238631046	ENSG00000253030.1,MIR2116,miRNA,chr15:57250673-57250753	NA	0	0	0	0	0	0	0	0	0	0	0	0	0	0
ENSG00000186599.7,DEFB105B,coding,chr8:7332600-7334525	NA	ENSG00000249880.1,RP11-432G16.1.1,lncRNA,chr5:95886726-95907978	ENSG00000233519.1,RP11-177F11.1.1,lncRNA,chr1:238630593-238631046	ENSG00000253030.1,MIR2116,miRNA,chr15:57250673-57250753	NA	0	0	0	0	0	0	0	0	0	0	0	0	0	0
ENSG00000186599.7,DEFB105B,coding,chr8:7332600-7334525	NA	ENSG00000234116.1,RP11-261C10.1.1,lncRNA,chr1:241235769-241237393	ENSG00000250902.1,RP11-301H24.4.1,lncRNA,chr4:146655216-146657720	ENSG00000253030.1,MIR2116,miRNA,chr15:57250673-57250753	NA	0	0	0	0	0	0	0	0	0	0	0	0	0	0
ENSG00000186599.7,DEFB105B,coding,chr8:7332600-7334525	NA	ENSG00000233519.1,RP11-177F11.1.1,lncRNA,chr1:238630593-238631046	ENSG00000250902.1,RP11-301H24.4.1,lncRNA,chr4:146655216-146657720	ENSG00000253030.1,MIR2116,miRNA,chr15:57250673-57250753	NA	0	0	0	0	0	0	0	0	0	0	0	0	0	0
ENSG00000186599.7,DEFB105B,coding,chr8:7332600-7334525	NA	ENSG00000234686.1,AC010971.1.1,lncRNA,chr7:49240278-49264958	ENSG00000259061.1,RP11-736P16.1.1,lncRNA,chr14:86472736-86525222	ENSG00000221410.1,MIR1238,miRNA,chr19:10523797-10523880	NA	0	0	0	0	0	0	0	0	0	0	0	0	0	0
ENSG00000186599.7,DEFB105B,coding,chr8:7332600-7334525	NA	ENSG00000259061.1,RP11-736P16.1.1,lncRNA,chr14:86472736-86525222	ENSG00000231597.1,AC007557.4.1,lncRNA,chr2:217427356-217428100	ENSG00000221410.1,MIR1238,miRNA,chr19:10523797-10523880	NA	0	0	0	0	0	0	0	0	0	0	0	0	0	0
ENSG00000186599.7,DEFB105B,coding,chr8:7332600-7334525	NA	ENSG00000232806.1,AP001610.9.1,lncRNA,chr21:41852921-41856755	ENSG00000259061.1,RP11-736P16.1.1,lncRNA,chr14:86472736-86525222	ENSG00000221410.1,MIR1238,miRNA,chr19:10523797-10523880	NA	0	0	0	0	0	0	0	0	0	0	0	0	0	0
ENSG00000186599.7,DEFB105B,coding,chr8:7332600-7334525	NA	ENSG00000234116.1,RP11-261C10.1.1,lncRNA,chr1:241235769-241237393	ENSG00000259061.1,RP11-736P16.1.1,lncRNA,chr14:86472736-86525222	ENSG00000221410.1,MIR1238,miRNA,chr19:10523797-10523880	NA	0	0	0	0	0	0	0	0	0	0	0	0	0	0
ENSG00000186599.7,DEFB105B,coding,chr8:7332600-7334525	NA	ENSG00000233519.1,RP11-177F11.1.1,lncRNA,chr1:238630593-238631046	ENSG00000259061.1,RP11-736P16.1.1,lncRNA,chr14:86472736-86525222	ENSG00000221410.1,MIR1238,miRNA,chr19:10523797-10523880	NA	0	0	0	0	0	0	0	0	0	0	0	0	0	0
ENSG00000186599.7,DEFB105B,coding,chr8:7332600-7334525	NA	ENSG00000230051.1,CTA-929C8.8.1,lncRNA,chr22:26057747-26105226	ENSG00000231238.1,LINC00349,lncRNA,chr13:18012636-18022837	ENSG00000221410.1,MIR1238,miRNA,chr19:10523797-10523880	NA	0	0	0	0	0	0	0	0	0	0	0	0	0	0
ENSG00000186599.7,DEFB105B,coding,chr8:7332600-7334525	NA	ENSG00000232806.1,AP001610.9.1,lncRNA,chr21:41852921-41856755	ENSG00000231238.1,LINC00349,lncRNA,chr13:18012636-18022837	ENSG00000221410.1,MIR1238,miRNA,chr19:10523797-10523880	NA	0	0	0	0	0	0	0	0	0	0	0	0	0	0
ENSG00000186599.7,DEFB105B,coding,chr8:7332600-7334525	NA	ENSG00000234116.1,RP11-261C10.1.1,lncRNA,chr1:241235769-241237393	ENSG00000231238.1,LINC00349,lncRNA,chr13:18012636-18022837	ENSG00000221410.1,MIR1238,miRNA,chr19:10523797-10523880	NA	0	0	0	0	0	0	0	0	0	0	0	0	0	0
ENSG00000186599.7,DEFB105B,coding,chr8:7332600-7334525	NA	ENSG00000233519.1,RP11-177F11.1.1,lncRNA,chr1:238630593-238631046	ENSG00000231238.1,LINC00349,lncRNA,chr13:18012636-18022837	ENSG00000221410.1,MIR1238,miRNA,chr19:10523797-10523880	NA	0	0	0	0	0	0	0	0	0	0	0	0	0	0
ENSG00000186599.7,DEFB105B,coding,chr8:7332600-7334525	NA	ENSG00000234686.1,AC010971.1.1,lncRNA,chr7:49240278-49264958	ENSG00000231597.1,AC007557.4.1,lncRNA,chr2:217427356-217428100	ENSG00000221410.1,MIR1238,miRNA,chr19:10523797-10523880	NA	0	0	0	0	0	0	0	0	0	0	0	0	0	0
ENSG00000186599.7,DEFB105B,coding,chr8:7332600-7334525	NA	ENSG00000233519.1,RP11-177F11.1.1,lncRNA,chr1:238630593-238631046	ENSG00000234686.1,AC010971.1.1,lncRNA,chr7:49240278-49264958	ENSG00000221410.1,MIR1238,miRNA,chr19:10523797-10523880	NA	0	0	0	0	0	0	0	0	0	0	0	0	0	0
ENSG00000186599.7,DEFB105B,coding,chr8:7332600-7334525	NA	ENSG00000233519.1,RP11-177F11.1.1,lncRNA,chr1:238630593-238631046	ENSG00000231597.1,AC007557.4.1,lncRNA,chr2:217427356-217428100	ENSG00000221410.1,MIR1238,miRNA,chr19:10523797-10523880	NA	0	0	0	0	0	0	0	0	0	0	0	0	0	0
ENSG00000186599.7,DEFB105B,coding,chr8:7332600-7334525	NA	ENSG00000232806.1,AP001610.9.1,lncRNA,chr21:41852921-41856755	ENSG00000233519.1,RP11-177F11.1.1,lncRNA,chr1:238630593-238631046	ENSG00000221410.1,MIR1238,miRNA,chr19:10523797-10523880	NA	0	0	0	0	0	0	0	0	0	0	0	0	0	0
ENSG00000204933.1,AC005392.1,coding,chr19:48571499-48575116	NA	ENSG00000197644.2,AC106870.2.1,lncRNA,chr2:29975966-29983569	ENSG00000234686.1,AC010971.1.1,lncRNA,chr7:49240278-49264958	ENSG00000221410.1,MIR1238,miRNA,chr19:10523797-10523880	NA	0	0	0	0	0	0	0	0	0	0	0	0	0	0
ENSG00000204933.1,AC005392.1,coding,chr19:48571499-48575116	NA	ENSG00000197644.2,AC106870.2.1,lncRNA,chr2:29975966-29983569	ENSG00000231597.1,AC007557.4.1,lncRNA,chr2:217427356-217428100	ENSG00000221410.1,MIR1238,miRNA,chr19:10523797-10523880	NA	0	0	0	0	0	0	0	0	0	0	0	0	0	0
ENSG00000204933.1,AC005392.1,coding,chr19:48571499-48575116	NA	ENSG00000197644.2,AC106870.2.1,lncRNA,chr2:29975966-29983569	ENSG00000234116.1,RP11-261C10.1.1,lncRNA,chr1:241235769-241237393	ENSG00000221410.1,MIR1238,miRNA,chr19:10523797-10523880	NA	0	0	0	0	0	0	0	0	0	0	0	0	0	0
ENSG00000204933.1,AC005392.1,coding,chr19:48571499-48575116	NA	ENSG00000197644.2,AC106870.2.1,lncRNA,chr2:29975966-29983569	ENSG00000233519.1,RP11-177F11.1.1,lncRNA,chr1:238630593-238631046	ENSG00000221410.1,MIR1238,miRNA,chr19:10523797-10523880	NA	0	0	0	0	0	0	0	0	0	0	0	0	0	0
ENSG00000214819.1,CDRT15L2,coding,chr17:20423628-20424816	ENSG00000172487.3,OR8J1,coding,chr11:55884266-55885340	ENSG00000250503.1,RP11-401I19.1.1,lncRNA,chr4:132021631-132026246	NA	ENSG00000207944.1,MIR574,miRNA,chr4:38546047-38546143	NA	0	0	0	0	0	0	0	0	0	0	0	0	0	0
ENSG00000214819.1,CDRT15L2,coding,chr17:20423628-20424816	ENSG00000172487.3,OR8J1,coding,chr11:55884266-55885340	ENSG00000249994.1,CTD-2383I20.1.1,lncRNA,chr5:4086825-4094877	NA	ENSG00000207944.1,MIR574,miRNA,chr4:38546047-38546143	NA	0	0	0	0	0	0	0	0	0	0	0	0	0	0
ENSG00000214819.1,CDRT15L2,coding,chr17:20423628-20424816	ENSG00000172487.3,OR8J1,coding,chr11:55884266-55885340	ENSG00000237342.1,AL132796.1.1,lncRNA,chr14:98380985-98381687	NA	ENSG00000207944.1,MIR574,miRNA,chr4:38546047-38546143	NA	0	0	0	0	0	0	0	0	0	0	0	0	0	0
ENSG00000214819.1,CDRT15L2,coding,chr17:20423628-20424816	ENSG00000172487.3,OR8J1,coding,chr11:55884266-55885340	ENSG00000237759.1,RP11-278H7.3.1,lncRNA,chr1:242337289-242338936	NA	ENSG00000207944.1,MIR574,miRNA,chr4:38546047-38546143	NA	0	0	0	0	0	0	0	0	0	0	0	0	0	0
ENSG00000214819.1,CDRT15L2,coding,chr17:20423628-20424816	ENSG00000172487.3,OR8J1,coding,chr11:55884266-55885340	ENSG00000227851.1,RP11-381K7.1.1,lncRNA,chr10:113099686-113101851	NA	ENSG00000207944.1,MIR574,miRNA,chr4:38546047-38546143	NA	0	0	0	0	0	0	0	0	0	0	0	0	0	0
ENSG00000214819.1,CDRT15L2,coding,chr17:20423628-20424816	ENSG00000172487.3,OR8J1,coding,chr11:55884266-55885340	ENSG00000251266.1,RP11-340A13.2.1,lncRNA,chr4:59532594-59595272	NA	ENSG00000207944.1,MIR574,miRNA,chr4:38546047-38546143	NA	0	0	0	0	0	0	0	0	0	0	0	0	0	0
ENSG00000214819.1,CDRT15L2,coding,chr17:20423628-20424816	ENSG00000172487.3,OR8J1,coding,chr11:55884266-55885340	ENSG00000230472.1,RP1-28O17.1.1,lncRNA,chr6:50663278-50712877	NA	ENSG00000207944.1,MIR574,miRNA,chr4:38546047-38546143	NA	0	0	0	0	0	0	0	0	0	0	0	0	0	0
ENSG00000214819.1,CDRT15L2,coding,chr17:20423628-20424816	ENSG00000172487.3,OR8J1,coding,chr11:55884266-55885340	ENSG00000242029.1,RP11-457K10.1.1,lncRNA,chr3:110849643-111012398	NA	ENSG00000207944.1,MIR574,miRNA,chr4:38546047-38546143	NA	0	0	0	0	0	0	0	0	0	1	0	0	0	1
ENSG00000214819.1,CDRT15L2,coding,chr17:20423628-20424816	ENSG00000172487.3,OR8J1,coding,chr11:55884266-55885340	ENSG00000249877.1,RP11-706F1.2.1,lncRNA,chr4:190446824-190449484	NA	ENSG00000207944.1,MIR574,miRNA,chr4:38546047-38546143	NA	0	0	0	0	0	0	0	0	0	0	0	0	0	0
ENSG00000244624.2,KRTAP20-1,coding,chr21:30910620-30910874	NA	ENSG00000256440.1,RP11-443N24.3.1,lncRNA,chr12:25875616-25878383	ENSG00000230690.1,AC013402.5.1,lncRNA,chr2:104642226-104647727	ENSG00000207613.1,MIR181C,miRNA,chr19:13846512-13846622	NA	0	0	0	0	0	0	0	0	0	0	0	0	0	0
ENSG00000259164.1,RP11-463C8.4.1,coding,chr14:76634406-76761558	NA	ENSG00000256440.1,RP11-443N24.3.1,lncRNA,chr12:25875616-25878383	ENSG00000230690.1,AC013402.5.1,lncRNA,chr2:104642226-104647727	ENSG00000207613.1,MIR181C,miRNA,chr19:13846512-13846622	NA	0	0	0	0	0	0	0	0	0	0	0	0	0	0
ENSG00000259164.1,RP11-463C8.4.1,coding,chr14:76634406-76761558	ENSG00000244624.2,KRTAP20-1,coding,chr21:30910620-30910874	ENSG00000256440.1,RP11-443N24.3.1,lncRNA,chr12:25875616-25878383	NA	ENSG00000207613.1,MIR181C,miRNA,chr19:13846512-13846622	NA	0	0	0	0	0	0	0	0	0	0	0	0	0	0
ENSG00000259164.1,RP11-463C8.4.1,coding,chr14:76634406-76761558	NA	ENSG00000258747.1,RP11-163M18.1.1,lncRNA,chr14:44046359-44077466	ENSG00000256440.1,RP11-443N24.3.1,lncRNA,chr12:25875616-25878383	ENSG00000207613.1,MIR181C,miRNA,chr19:13846512-13846622	NA	0	0	0	0	0	0	0	0	0	0	0	0	0	0
ENSG00000259164.1,RP11-463C8.4.1,coding,chr14:76634406-76761558	NA	ENSG00000229546.1,RP11-366O17.3.1,lncRNA,chr13:42314549-42315023	ENSG00000232597.1,AC013727.1.1,lncRNA,chr2:103839859-103863099	ENSG00000221552.1,MIR1303,miRNA,chr5:154045528-154045614	NA	0	0	0	0	0	0	0	0	0	0	0	0	0	0
ENSG00000259164.1,RP11-463C8.4.1,coding,chr14:76634406-76761558	NA	ENSG00000257470.1,RP11-397H6.1.1,lncRNA,chr12:95941929-95969038	ENSG00000229546.1,RP11-366O17.3.1,lncRNA,chr13:42314549-42315023	ENSG00000221552.1,MIR1303,miRNA,chr5:154045528-154045614	NA	0	0	0	0	0	0	0	0	0	0	0	0	0	0
ENSG00000259164.1,RP11-463C8.4.1,coding,chr14:76634406-76761558	NA	ENSG00000258747.1,RP11-163M18.1.1,lncRNA,chr14:44046359-44077466	ENSG00000229546.1,RP11-366O17.3.1,lncRNA,chr13:42314549-42315023	ENSG00000221552.1,MIR1303,miRNA,chr5:154045528-154045614	NA	0	0	0	0	0	0	0	0	0	0	0	0	0	0
ENSG00000214970.1,AC005323.1.1,coding,chr17:10379115-10381898	NA	ENSG00000223351.1,ZNF385D-AS2,lncRNA,chr3:21959061-21996324	ENSG00000257522.1,RP11-562L8.1.1,lncRNA,chr14:28803781-28920252	ENSG00000221552.1,MIR1303,miRNA,chr5:154045528-154045614	NA	0	0	0	0	0	0	0	0	0	0	0	0	0	0
ENSG00000214970.1,AC005323.1.1,coding,chr17:10379115-10381898	NA	ENSG00000237670.1,AC080094.1.1,lncRNA,chr2:17014781-17019245	ENSG00000257522.1,RP11-562L8.1.1,lncRNA,chr14:28803781-28920252	ENSG00000221552.1,MIR1303,miRNA,chr5:154045528-154045614	NA	0	0	0	0	0	0	0	0	0	0	0	0	0	0
ENSG00000214970.1,AC005323.1.1,coding,chr17:10379115-10381898	ENSG00000237671.3,GAGE12C,coding,chrX:49183757-49191085	ENSG00000223351.1,ZNF385D-AS2,lncRNA,chr3:21959061-21996324	NA	ENSG00000221552.1,MIR1303,miRNA,chr5:154045528-154045614	NA	0	0	0	0	0	0	0	0	0	0	0	0	0	0
ENSG00000214970.1,AC005323.1.1,coding,chr17:10379115-10381898	ENSG00000237671.3,GAGE12C,coding,chrX:49183757-49191085	ENSG00000254178.1,RP11-299D14.2.1,lncRNA,chr8:25747561-25753568	NA	ENSG00000221552.1,MIR1303,miRNA,chr5:154045528-154045614	NA	0	0	0	0	0	0	0	0	0	0	0	0	0	0
ENSG00000214970.1,AC005323.1.1,coding,chr17:10379115-10381898	ENSG00000237671.3,GAGE12C,coding,chrX:49183757-49191085	ENSG00000257470.1,RP11-397H6.1.1,lncRNA,chr12:95941929-95969038	NA	ENSG00000221552.1,MIR1303,miRNA,chr5:154045528-154045614	NA	0	0	0	0	0	0	0	0	0	0	0	0	0	0
ENSG00000214970.1,AC005323.1.1,coding,chr17:10379115-10381898	ENSG00000237671.3,GAGE12C,coding,chrX:49183757-49191085	ENSG00000258747.1,RP11-163M18.1.1,lncRNA,chr14:44046359-44077466	NA	ENSG00000221552.1,MIR1303,miRNA,chr5:154045528-154045614	NA	0	0	0	0	0	0	0	0	0	0	0	0	0	0
ENSG00000214970.1,AC005323.1.1,coding,chr17:10379115-10381898	NA	ENSG00000223351.1,ZNF385D-AS2,lncRNA,chr3:21959061-21996324	ENSG00000254178.1,RP11-299D14.2.1,lncRNA,chr8:25747561-25753568	ENSG00000221552.1,MIR1303,miRNA,chr5:154045528-154045614	NA	0	0	0	0	0	0	0	0	0	0	0	0	0	0
ENSG00000214970.1,AC005323.1.1,coding,chr17:10379115-10381898	NA	ENSG00000257470.1,RP11-397H6.1.1,lncRNA,chr12:95941929-95969038	ENSG00000223351.1,ZNF385D-AS2,lncRNA,chr3:21959061-21996324	ENSG00000221552.1,MIR1303,miRNA,chr5:154045528-154045614	NA	0	0	0	0	0	0	0	0	0	0	0	0	0	0
ENSG00000214970.1,AC005323.1.1,coding,chr17:10379115-10381898	NA	ENSG00000258747.1,RP11-163M18.1.1,lncRNA,chr14:44046359-44077466	ENSG00000223351.1,ZNF385D-AS2,lncRNA,chr3:21959061-21996324	ENSG00000221552.1,MIR1303,miRNA,chr5:154045528-154045614	NA	0	0	0	0	0	0	0	0	0	0	0	0	0	0
ENSG00000259164.1,RP11-463C8.4.1,coding,chr14:76634406-76761558	ENSG00000214970.1,AC005323.1.1,coding,chr17:10379115-10381898	ENSG00000223351.1,ZNF385D-AS2,lncRNA,chr3:21959061-21996324	NA	ENSG00000221552.1,MIR1303,miRNA,chr5:154045528-154045614	NA	0	0	0	0	0	0	0	0	0	0	0	0	0	0
ENSG00000214970.1,AC005323.1.1,coding,chr17:10379115-10381898	NA	ENSG00000258747.1,RP11-163M18.1.1,lncRNA,chr14:44046359-44077466	ENSG00000257470.1,RP11-397H6.1.1,lncRNA,chr12:95941929-95969038	ENSG00000221552.1,MIR1303,miRNA,chr5:154045528-154045614	NA	0	0	0	0	0	0	0	0	0	0	0	0	0	0
ENSG00000259164.1,RP11-463C8.4.1,coding,chr14:76634406-76761558	ENSG00000214970.1,AC005323.1.1,coding,chr17:10379115-10381898	ENSG00000257470.1,RP11-397H6.1.1,lncRNA,chr12:95941929-95969038	NA	ENSG00000221552.1,MIR1303,miRNA,chr5:154045528-154045614	NA	0	0	0	0	0	0	0	0	0	0	0	0	0	0
ENSG00000259164.1,RP11-463C8.4.1,coding,chr14:76634406-76761558	ENSG00000214970.1,AC005323.1.1,coding,chr17:10379115-10381898	ENSG00000258747.1,RP11-163M18.1.1,lncRNA,chr14:44046359-44077466	NA	ENSG00000221552.1,MIR1303,miRNA,chr5:154045528-154045614	NA	0	0	0	0	0	0	0	0	0	0	0	0	0	0
ENSG00000237671.3,GAGE12C,coding,chrX:49183757-49191085	NA	ENSG00000223351.1,ZNF385D-AS2,lncRNA,chr3:21959061-21996324	ENSG00000253432.1,RP11-324F11.1.1,lncRNA,chr8:140177729-140184255	ENSG00000221552.1,MIR1303,miRNA,chr5:154045528-154045614	NA	0	0	0	0	0	0	0	0	0	0	0	0	0	0
ENSG00000237671.3,GAGE12C,coding,chrX:49183757-49191085	NA	ENSG00000223351.1,ZNF385D-AS2,lncRNA,chr3:21959061-21996324	ENSG00000254178.1,RP11-299D14.2.1,lncRNA,chr8:25747561-25753568	ENSG00000221552.1,MIR1303,miRNA,chr5:154045528-154045614	NA	0	0	0	0	0	0	0	0	0	0	0	0	0	0
ENSG00000237671.3,GAGE12C,coding,chrX:49183757-49191085	NA	ENSG00000257470.1,RP11-397H6.1.1,lncRNA,chr12:95941929-95969038	ENSG00000223351.1,ZNF385D-AS2,lncRNA,chr3:21959061-21996324	ENSG00000221552.1,MIR1303,miRNA,chr5:154045528-154045614	NA	0	0	0	0	0	0	0	0	0	0	0	0	0	0
ENSG00000237671.3,GAGE12C,coding,chrX:49183757-49191085	NA	ENSG00000258747.1,RP11-163M18.1.1,lncRNA,chr14:44046359-44077466	ENSG00000223351.1,ZNF385D-AS2,lncRNA,chr3:21959061-21996324	ENSG00000221552.1,MIR1303,miRNA,chr5:154045528-154045614	NA	0	0	0	0	0	0	0	0	0	0	0	0	0	0
ENSG00000259164.1,RP11-463C8.4.1,coding,chr14:76634406-76761558	ENSG00000237671.3,GAGE12C,coding,chrX:49183757-49191085	ENSG00000223351.1,ZNF385D-AS2,lncRNA,chr3:21959061-21996324	NA	ENSG00000221552.1,MIR1303,miRNA,chr5:154045528-154045614	NA	0	0	0	0	0	0	0	0	0	0	0	0	0	0
ENSG00000237671.3,GAGE12C,coding,chrX:49183757-49191085	NA	ENSG00000253432.1,RP11-324F11.1.1,lncRNA,chr8:140177729-140184255	ENSG00000254178.1,RP11-299D14.2.1,lncRNA,chr8:25747561-25753568	ENSG00000221552.1,MIR1303,miRNA,chr5:154045528-154045614	NA	0	0	0	0	0	0	0	0	0	0	0	0	0	0
ENSG00000237671.3,GAGE12C,coding,chrX:49183757-49191085	NA	ENSG00000257470.1,RP11-397H6.1.1,lncRNA,chr12:95941929-95969038	ENSG00000253432.1,RP11-324F11.1.1,lncRNA,chr8:140177729-140184255	ENSG00000221552.1,MIR1303,miRNA,chr5:154045528-154045614	NA	0	0	0	0	0	0	0	0	0	0	0	0	0	0
ENSG00000237671.3,GAGE12C,coding,chrX:49183757-49191085	NA	ENSG00000258747.1,RP11-163M18.1.1,lncRNA,chr14:44046359-44077466	ENSG00000253432.1,RP11-324F11.1.1,lncRNA,chr8:140177729-140184255	ENSG00000221552.1,MIR1303,miRNA,chr5:154045528-154045614	NA	0	0	0	0	0	0	0	0	0	0	0	0	0	0
ENSG00000259164.1,RP11-463C8.4.1,coding,chr14:76634406-76761558	ENSG00000237671.3,GAGE12C,coding,chrX:49183757-49191085	ENSG00000253432.1,RP11-324F11.1.1,lncRNA,chr8:140177729-140184255	NA	ENSG00000221552.1,MIR1303,miRNA,chr5:154045528-154045614	NA	0	0	0	0	0	0	0	0	0	0	0	0	0	0
ENSG00000237671.3,GAGE12C,coding,chrX:49183757-49191085	NA	ENSG00000258747.1,RP11-163M18.1.1,lncRNA,chr14:44046359-44077466	ENSG00000257470.1,RP11-397H6.1.1,lncRNA,chr12:95941929-95969038	ENSG00000221552.1,MIR1303,miRNA,chr5:154045528-154045614	NA	0	0	0	0	0	0	0	0	0	0	0	0	0	0
ENSG00000259164.1,RP11-463C8.4.1,coding,chr14:76634406-76761558	ENSG00000237671.3,GAGE12C,coding,chrX:49183757-49191085	ENSG00000257470.1,RP11-397H6.1.1,lncRNA,chr12:95941929-95969038	NA	ENSG00000221552.1,MIR1303,miRNA,chr5:154045528-154045614	NA	0	0	0	0	0	0	0	0	0	0	0	0	0	0
ENSG00000259164.1,RP11-463C8.4.1,coding,chr14:76634406-76761558	ENSG00000237671.3,GAGE12C,coding,chrX:49183757-49191085	ENSG00000258747.1,RP11-163M18.1.1,lncRNA,chr14:44046359-44077466	NA	ENSG00000221552.1,MIR1303,miRNA,chr5:154045528-154045614	NA	0	0	0	0	0	0	0	0	0	0	0	0	0	0
ENSG00000259164.1,RP11-463C8.4.1,coding,chr14:76634406-76761558	NA	ENSG00000257470.1,RP11-397H6.1.1,lncRNA,chr12:95941929-95969038	ENSG00000250855.1,RP11-269F21.1.1,lncRNA,chr4:112943405-112980491	ENSG00000221552.1,MIR1303,miRNA,chr5:154045528-154045614	NA	0	0	0	0	0	0	0	0	0	0	0	0	0	0
ENSG00000259164.1,RP11-463C8.4.1,coding,chr14:76634406-76761558	NA	ENSG00000258747.1,RP11-163M18.1.1,lncRNA,chr14:44046359-44077466	ENSG00000250855.1,RP11-269F21.1.1,lncRNA,chr4:112943405-112980491	ENSG00000221552.1,MIR1303,miRNA,chr5:154045528-154045614	NA	0	0	0	0	0	0	0	0	0	0	0	0	0	0
ENSG00000259164.1,RP11-463C8.4.1,coding,chr14:76634406-76761558	NA	ENSG00000258747.1,RP11-163M18.1.1,lncRNA,chr14:44046359-44077466	ENSG00000230352.1,RP4-614C15.3.1,lncRNA,chr20:57369376-57373223	ENSG00000221552.1,MIR1303,miRNA,chr5:154045528-154045614	NA	0	0	0	0	0	0	0	0	0	0	0	0	0	0
ENSG00000259164.1,RP11-463C8.4.1,coding,chr14:76634406-76761558	NA	ENSG00000223351.1,ZNF385D-AS2,lncRNA,chr3:21959061-21996324	ENSG00000253432.1,RP11-324F11.1.1,lncRNA,chr8:140177729-140184255	ENSG00000221552.1,MIR1303,miRNA,chr5:154045528-154045614	NA	0	0	0	0	0	0	0	0	0	0	0	0	0	0
ENSG00000259164.1,RP11-463C8.4.1,coding,chr14:76634406-76761558	NA	ENSG00000257470.1,RP11-397H6.1.1,lncRNA,chr12:95941929-95969038	ENSG00000223351.1,ZNF385D-AS2,lncRNA,chr3:21959061-21996324	ENSG00000221552.1,MIR1303,miRNA,chr5:154045528-154045614	NA	0	0	0	0	0	0	0	0	0	0	0	0	0	0
ENSG00000259164.1,RP11-463C8.4.1,coding,chr14:76634406-76761558	NA	ENSG00000258747.1,RP11-163M18.1.1,lncRNA,chr14:44046359-44077466	ENSG00000223351.1,ZNF385D-AS2,lncRNA,chr3:21959061-21996324	ENSG00000221552.1,MIR1303,miRNA,chr5:154045528-154045614	NA	0	0	0	0	0	0	0	0	0	0	0	0	0	0
ENSG00000259164.1,RP11-463C8.4.1,coding,chr14:76634406-76761558	NA	ENSG00000257470.1,RP11-397H6.1.1,lncRNA,chr12:95941929-95969038	ENSG00000232597.1,AC013727.1.1,lncRNA,chr2:103839859-103863099	ENSG00000221552.1,MIR1303,miRNA,chr5:154045528-154045614	NA	0	0	0	0	0	0	0	0	0	0	0	0	0	0
ENSG00000259164.1,RP11-463C8.4.1,coding,chr14:76634406-76761558	NA	ENSG00000258747.1,RP11-163M18.1.1,lncRNA,chr14:44046359-44077466	ENSG00000232597.1,AC013727.1.1,lncRNA,chr2:103839859-103863099	ENSG00000221552.1,MIR1303,miRNA,chr5:154045528-154045614	NA	0	0	0	0	0	0	0	0	0	0	0	0	0	0
ENSG00000259164.1,RP11-463C8.4.1,coding,chr14:76634406-76761558	NA	ENSG00000257470.1,RP11-397H6.1.1,lncRNA,chr12:95941929-95969038	ENSG00000253432.1,RP11-324F11.1.1,lncRNA,chr8:140177729-140184255	ENSG00000221552.1,MIR1303,miRNA,chr5:154045528-154045614	NA	0	0	0	0	0	0	0	0	0	0	0	0	0	0
ENSG00000259164.1,RP11-463C8.4.1,coding,chr14:76634406-76761558	NA	ENSG00000258747.1,RP11-163M18.1.1,lncRNA,chr14:44046359-44077466	ENSG00000253432.1,RP11-324F11.1.1,lncRNA,chr8:140177729-140184255	ENSG00000221552.1,MIR1303,miRNA,chr5:154045528-154045614	NA	0	0	0	0	0	0	0	0	0	0	0	0	0	0
ENSG00000259164.1,RP11-463C8.4.1,coding,chr14:76634406-76761558	NA	ENSG00000258747.1,RP11-163M18.1.1,lncRNA,chr14:44046359-44077466	ENSG00000257470.1,RP11-397H6.1.1,lncRNA,chr12:95941929-95969038	ENSG00000221552.1,MIR1303,miRNA,chr5:154045528-154045614	NA	0	0	0	0	0	0	0	0	0	0	0	0	0	0
ENSG00000177151.3,OR2T35,coding,chr1:246868210-246869182	NA	ENSG00000237266.1,AC010729.3.1,lncRNA,chr2:5868223-5870179	ENSG00000231557.1,AC018717.1.1,lncRNA,chr2:199455541-199644759	ENSG00000211589.1,MIR744,miRNA,chr17:11925940-11926038	NA	0	0	0	0	0	0	0	0	0	0	0	0	0	0
ENSG00000181371.2,OR5M8,coding,chr11:56014400-56015447	NA	ENSG00000237266.1,AC010729.3.1,lncRNA,chr2:5868223-5870179	ENSG00000231557.1,AC018717.1.1,lncRNA,chr2:199455541-199644759	ENSG00000211589.1,MIR744,miRNA,chr17:11925940-11926038	NA	0	0	0	0	0	0	0	0	0	0	0	0	0	0
ENSG00000259164.1,RP11-463C8.4.1,coding,chr14:76634406-76761558	NA	ENSG00000237266.1,AC010729.3.1,lncRNA,chr2:5868223-5870179	ENSG00000231557.1,AC018717.1.1,lncRNA,chr2:199455541-199644759	ENSG00000211589.1,MIR744,miRNA,chr17:11925940-11926038	NA	0	0	0	0	0	0	0	0	0	0	0	0	0	0
ENSG00000259164.1,RP11-463C8.4.1,coding,chr14:76634406-76761558	NA	ENSG00000231557.1,AC018717.1.1,lncRNA,chr2:199455541-199644759	ENSG00000234306.1,RP11-271F18.1.1,lncRNA,chr10:10447148-10448456	ENSG00000211589.1,MIR744,miRNA,chr17:11925940-11926038	NA	0	0	0	0	0	0	0	0	0	0	0	0	0	0
ENSG00000177151.3,OR2T35,coding,chr1:246868210-246869182	NA	ENSG00000257470.1,RP11-397H6.1.1,lncRNA,chr12:95941929-95969038	ENSG00000231557.1,AC018717.1.1,lncRNA,chr2:199455541-199644759	ENSG00000211589.1,MIR744,miRNA,chr17:11925940-11926038	NA	0	0	0	0	0	0	0	0	0	0	0	0	0	0
ENSG00000181371.2,OR5M8,coding,chr11:56014400-56015447	NA	ENSG00000231557.1,AC018717.1.1,lncRNA,chr2:199455541-199644759	ENSG00000236299.1,RP11-340I6.7.1,lncRNA,chr7:62986012-62996654	ENSG00000211589.1,MIR744,miRNA,chr17:11925940-11926038	NA	0	0	0	0	0	0	0	0	0	0	0	0	0	0
ENSG00000181371.2,OR5M8,coding,chr11:56014400-56015447	NA	ENSG00000223479.2,RP11-275A6.1.1,lncRNA,chr1:73873486-73947852	ENSG00000231557.1,AC018717.1.1,lncRNA,chr2:199455541-199644759	ENSG00000211589.1,MIR744,miRNA,chr17:11925940-11926038	NA	0	0	0	0	0	0	0	0	0	0	0	0	0	0
ENSG00000259164.1,RP11-463C8.4.1,coding,chr14:76634406-76761558	NA	ENSG00000257470.1,RP11-397H6.1.1,lncRNA,chr12:95941929-95969038	ENSG00000231557.1,AC018717.1.1,lncRNA,chr2:199455541-199644759	ENSG00000211589.1,MIR744,miRNA,chr17:11925940-11926038	NA	0	0	0	0	0	0	0	0	0	0	0	0	0	0
ENSG00000259164.1,RP11-463C8.4.1,coding,chr14:76634406-76761558	NA	ENSG00000258747.1,RP11-163M18.1.1,lncRNA,chr14:44046359-44077466	ENSG00000231557.1,AC018717.1.1,lncRNA,chr2:199455541-199644759	ENSG00000211589.1,MIR744,miRNA,chr17:11925940-11926038	NA	0	0	0	0	0	0	0	0	0	0	0	0	0	0
ENSG00000181371.2,OR5M8,coding,chr11:56014400-56015447	NA	ENSG00000231557.1,AC018717.1.1,lncRNA,chr2:199455541-199644759	ENSG00000230440.1,RP13-329D4.3.1,lncRNA,chr20:26061522-26062834	ENSG00000199179.1,MIRLET7I,miRNA,chr12:61283732-61283817	NA	0	0	0	0	0	0	0	0	0	0	0	0	0	0
ENSG00000181371.2,OR5M8,coding,chr11:56014400-56015447	NA	ENSG00000231557.1,AC018717.1.1,lncRNA,chr2:199455541-199644759	ENSG00000236299.1,RP11-340I6.7.1,lncRNA,chr7:62986012-62996654	ENSG00000199179.1,MIRLET7I,miRNA,chr12:61283732-61283817	NA	0	0	0	0	0	0	0	0	0	0	0	0	0	0
ENSG00000181371.2,OR5M8,coding,chr11:56014400-56015447	NA	ENSG00000234767.1,RP11-223F20.2.1,lncRNA,chr13:65338306-65350352	ENSG00000231557.1,AC018717.1.1,lncRNA,chr2:199455541-199644759	ENSG00000199179.1,MIRLET7I,miRNA,chr12:61283732-61283817	NA	0	0	0	0	0	0	0	0	0	0	0	0	0	0
ENSG00000259164.1,RP11-463C8.4.1,coding,chr14:76634406-76761558	NA	ENSG00000257470.1,RP11-397H6.1.1,lncRNA,chr12:95941929-95969038	ENSG00000231557.1,AC018717.1.1,lncRNA,chr2:199455541-199644759	ENSG00000221525.1,MIR1185-1,miRNA,chr14:100579066-100579152	NA	0	0	0	0	0	0	0	0	0	0	0	0	0	0
ENSG00000259164.1,RP11-463C8.4.1,coding,chr14:76634406-76761558	NA	ENSG00000234767.1,RP11-223F20.2.1,lncRNA,chr13:65338306-65350352	ENSG00000231557.1,AC018717.1.1,lncRNA,chr2:199455541-199644759	ENSG00000221525.1,MIR1185-1,miRNA,chr14:100579066-100579152	NA	0	0	0	0	0	0	0	0	0	0	0	0	0	0
ENSG00000259164.1,RP11-463C8.4.1,coding,chr14:76634406-76761558	NA	ENSG00000258747.1,RP11-163M18.1.1,lncRNA,chr14:44046359-44077466	ENSG00000231557.1,AC018717.1.1,lncRNA,chr2:199455541-199644759	ENSG00000221525.1,MIR1185-1,miRNA,chr14:100579066-100579152	NA	0	0	0	0	0	0	0	0	0	0	0	0	0	0
ENSG00000255012.1,OR5M1,coding,chr11:56136606-56137554	NA	ENSG00000251339.1,RP11-506N2.1.1,lncRNA,chr4:59341547-59532465	ENSG00000230690.1,AC013402.5.1,lncRNA,chr2:104642226-104647727	ENSG00000207613.1,MIR181C,miRNA,chr19:13846512-13846622	NA	0	0	0	0	0	0	0	0	0	0	0	0	0	0
ENSG00000255012.1,OR5M1,coding,chr11:56136606-56137554	NA	ENSG00000253634.1,RP11-587H10.2.1,lncRNA,chr8:93646846-93736898	ENSG00000251339.1,RP11-506N2.1.1,lncRNA,chr4:59341547-59532465	ENSG00000207613.1,MIR181C,miRNA,chr19:13846512-13846622	NA	0	0	0	0	0	0	0	0	0	0	0	0	0	0
ENSG00000184345.4,IQCF2,coding,chr3:51870684-51872480	NA	ENSG00000237414.1,RP11-321L2.2.1,lncRNA,chr9:23884987-23888054	ENSG00000258649.1,CTD-2142D14.1.1,lncRNA,chr14:37729938-37741879	ENSG00000207613.1,MIR181C,miRNA,chr19:13846512-13846622	NA	0	0	0	0	0	0	0	0	0	0	0	0	0	0
ENSG00000259164.1,RP11-463C8.4.1,coding,chr14:76634406-76761558	NA	ENSG00000237414.1,RP11-321L2.2.1,lncRNA,chr9:23884987-23888054	ENSG00000258649.1,CTD-2142D14.1.1,lncRNA,chr14:37729938-37741879	ENSG00000207613.1,MIR181C,miRNA,chr19:13846512-13846622	NA	0	0	0	0	0	0	0	0	0	0	0	0	0	0
ENSG00000184345.4,IQCF2,coding,chr3:51870684-51872480	NA	ENSG00000258649.1,CTD-2142D14.1.1,lncRNA,chr14:37729938-37741879	ENSG00000234686.1,AC010971.1.1,lncRNA,chr7:49240278-49264958	ENSG00000207613.1,MIR181C,miRNA,chr19:13846512-13846622	NA	0	0	0	0	0	0	0	0	0	0	0	0	0	0
ENSG00000259164.1,RP11-463C8.4.1,coding,chr14:76634406-76761558	NA	ENSG00000258649.1,CTD-2142D14.1.1,lncRNA,chr14:37729938-37741879	ENSG00000257523.1,CTD-2384A14.2.1,lncRNA,chr14:28514792-28517881	ENSG00000207755.1,MIR450A2,miRNA,chrX:133502203-133502303	NA	0	0	0	0	0	0	0	0	0	0	1	0	0	1
ENSG00000259164.1,RP11-463C8.4.1,coding,chr14:76634406-76761558	NA	ENSG00000258747.1,RP11-163M18.1.1,lncRNA,chr14:44046359-44077466	ENSG00000258649.1,CTD-2142D14.1.1,lncRNA,chr14:37729938-37741879	ENSG00000207613.1,MIR181C,miRNA,chr19:13846512-13846622	NA	0	0	0	0	0	0	0	0	0	0	0	0	0	0
ENSG00000251546.1,IGKV1D-39,coding,chr2:89400495-89400995	NA	ENSG00000250078.1,RP11-577G20.2.1,lncRNA,chr4:59123086-59126044	ENSG00000249782.1,RP11-417J1.1.1,lncRNA,chr5:8578290-8581791	ENSG00000215946.1,MIR941-1,miRNA,chr20:62021819-62021910	NA	0	0	0	0	0	0	0	0	0	0	0	1	0	1
ENSG00000251546.1,IGKV1D-39,coding,chr2:89400495-89400995	NA	ENSG00000249782.1,RP11-417J1.1.1,lncRNA,chr5:8578290-8581791	NA	ENSG00000207964.1,MIR628,miRNA,chr15:53452429-53452524	ENSG00000215946.1,MIR941-1,miRNA,chr20:62021819-62021910	0	0	0	0	0	0	0	0	0	0	0	1	1	2
ENSG00000172208.3,OR4X2,coding,chr11:48223183-48224198	NA	ENSG00000250078.1,RP11-577G20.2.1,lncRNA,chr4:59123086-59126044	ENSG00000249782.1,RP11-417J1.1.1,lncRNA,chr5:8578290-8581791	ENSG00000207597.1,MIR490,miRNA,chr7:136238453-136238581	NA	0	0	0	0	0	0	0	0	0	0	0	0	0	0
ENSG00000172208.3,OR4X2,coding,chr11:48223183-48224198	ENSG00000237388.2,OR4A47,coding,chr11:48466844-48467908	ENSG00000249782.1,RP11-417J1.1.1,lncRNA,chr5:8578290-8581791	NA	ENSG00000207597.1,MIR490,miRNA,chr7:136238453-136238581	NA	0	0	0	0	0	0	0	0	0	0	0	0	0	0
ENSG00000237388.2,OR4A47,coding,chr11:48466844-48467908	NA	ENSG00000250078.1,RP11-577G20.2.1,lncRNA,chr4:59123086-59126044	ENSG00000249782.1,RP11-417J1.1.1,lncRNA,chr5:8578290-8581791	ENSG00000207597.1,MIR490,miRNA,chr7:136238453-136238581	NA	0	0	0	0	0	0	0	0	0	0	0	0	0	0
ENSG00000188069.3,OR51F1,coding,chr11:4746784-4747744	NA	ENSG00000233470.1,RP11-524K22.1.1,lncRNA,chr6:50589706-50596776	ENSG00000235154.1,CTA-280A3__B.2.1,lncRNA,chr22:46819190-46823030	ENSG00000251856.1,MIR449C,miRNA,chr5:54503846-54503938	NA	0	0	0	0	0	0	0	1	0	0	0	0	0	1
ENSG00000176922.2,OR51S1,coding,chr11:4826002-4827090	NA	ENSG00000231200.1,AC068490.2.1,lncRNA,chr2:22009712-22607482	ENSG00000233470.1,RP11-524K22.1.1,lncRNA,chr6:50589706-50596776	ENSG00000251856.1,MIR449C,miRNA,chr5:54503846-54503938	NA	0	0	0	0	0	0	0	1	0	0	0	0	0	1
ENSG00000259164.1,RP11-463C8.4.1,coding,chr14:76634406-76761558	NA	ENSG00000231200.1,AC068490.2.1,lncRNA,chr2:22009712-22607482	ENSG00000233470.1,RP11-524K22.1.1,lncRNA,chr6:50589706-50596776	ENSG00000251856.1,MIR449C,miRNA,chr5:54503846-54503938	NA	0	0	0	0	0	0	0	0	0	0	0	0	0	0
ENSG00000188069.3,OR51F1,coding,chr11:4746784-4747744	NA	ENSG00000253613.1,CTC-551A13.2.1,lncRNA,chr5:110439794-110455712	ENSG00000233470.1,RP11-524K22.1.1,lncRNA,chr6:50589706-50596776	ENSG00000251856.1,MIR449C,miRNA,chr5:54503846-54503938	NA	0	0	0	0	0	0	0	1	0	0	0	0	0	1
ENSG00000176937.8,OR52R1,coding,chr11:4781238-4782423	NA	ENSG00000253613.1,CTC-551A13.2.1,lncRNA,chr5:110439794-110455712	ENSG00000233470.1,RP11-524K22.1.1,lncRNA,chr6:50589706-50596776	ENSG00000251856.1,MIR449C,miRNA,chr5:54503846-54503938	NA	0	0	0	0	0	0	0	0	0	0	0	0	0	0
ENSG00000259164.1,RP11-463C8.4.1,coding,chr14:76634406-76761558	NA	ENSG00000253613.1,CTC-551A13.2.1,lncRNA,chr5:110439794-110455712	ENSG00000233470.1,RP11-524K22.1.1,lncRNA,chr6:50589706-50596776	ENSG00000251856.1,MIR449C,miRNA,chr5:54503846-54503938	NA	0	0	0	0	0	0	0	0	0	0	0	0	0	0
ENSG00000188069.3,OR51F1,coding,chr11:4746784-4747744	NA	ENSG00000248223.1,CTD-2139B15.2.1,lncRNA,chr5:17407018-17408008	ENSG00000233470.1,RP11-524K22.1.1,lncRNA,chr6:50589706-50596776	ENSG00000251856.1,MIR449C,miRNA,chr5:54503846-54503938	NA	0	0	0	0	0	0	0	1	0	0	0	0	0	1
ENSG00000259164.1,RP11-463C8.4.1,coding,chr14:76634406-76761558	NA	ENSG00000248223.1,CTD-2139B15.2.1,lncRNA,chr5:17407018-17408008	ENSG00000233470.1,RP11-524K22.1.1,lncRNA,chr6:50589706-50596776	ENSG00000251856.1,MIR449C,miRNA,chr5:54503846-54503938	NA	0	0	0	0	0	0	0	0	0	0	0	0	0	0
ENSG00000259164.1,RP11-463C8.4.1,coding,chr14:76634406-76761558	NA	ENSG00000233470.1,RP11-524K22.1.1,lncRNA,chr6:50589706-50596776	ENSG00000249111.1,RP11-622J8.1.1,lncRNA,chr4:59701146-59724459	ENSG00000251856.1,MIR449C,miRNA,chr5:54503846-54503938	NA	0	0	0	0	0	0	0	0	0	0	0	0	0	0
ENSG00000259164.1,RP11-463C8.4.1,coding,chr14:76634406-76761558	NA	ENSG00000258747.1,RP11-163M18.1.1,lncRNA,chr14:44046359-44077466	ENSG00000233470.1,RP11-524K22.1.1,lncRNA,chr6:50589706-50596776	ENSG00000251856.1,MIR449C,miRNA,chr5:54503846-54503938	NA	0	0	0	0	0	0	0	0	0	0	0	0	0	0
ENSG00000215356.3,ZNF705B,coding,chr8:7821268-7849681	NA	ENSG00000261285.1,RP11-481E4.2.1,lncRNA,chr16:81087098-81102025	ENSG00000243903.1,RP11-285B24.1.1,lncRNA,chr3:59340789-59349470	ENSG00000208017.1,MIR140,miRNA,chr16:68524484-68524584	NA	0	0	0	0	0	0	0	1	0	0	0	0	0	1
ENSG00000215356.3,ZNF705B,coding,chr8:7821268-7849681	NA	ENSG00000243903.1,RP11-285B24.1.1,lncRNA,chr3:59340789-59349470	ENSG00000227090.1,AP000402.3.1,lncRNA,chr21:25180860-25196941	ENSG00000208017.1,MIR140,miRNA,chr16:68524484-68524584	NA	0	0	0	0	0	0	0	1	0	0	0	0	0	1
ENSG00000172150.4,OR1A2,coding,chr17:3047562-3048492	NA	ENSG00000232170.1,GS1-756B1.2.1,lncRNA,chr10:8341299-8350274	NA	ENSG00000221067.1,MIR1280,miRNA,chr3:129563697-129563791	ENSG00000221753.1,MIR1273A,miRNA,chr8:101105385-101105488	0	0	0	0	0	0	0	0	0	0	0	0	0	0
ENSG00000172150.4,OR1A2,coding,chr17:3047562-3048492	NA	ENSG00000236653.1,AC005235.1.1,lncRNA,chr2:198872331-198948066	NA	ENSG00000221067.1,MIR1280,miRNA,chr3:129563697-129563791	ENSG00000221753.1,MIR1273A,miRNA,chr8:101105385-101105488	0	0	0	0	0	0	0	0	0	0	0	0	0	0
ENSG00000172150.4,OR1A2,coding,chr17:3047562-3048492	NA	ENSG00000258747.1,RP11-163M18.1.1,lncRNA,chr14:44046359-44077466	NA	ENSG00000221067.1,MIR1280,miRNA,chr3:129563697-129563791	ENSG00000221753.1,MIR1273A,miRNA,chr8:101105385-101105488	0	0	0	0	0	0	0	0	0	0	0	0	0	0
ENSG00000172150.4,OR1A2,coding,chr17:3047562-3048492	NA	ENSG00000232170.1,GS1-756B1.2.1,lncRNA,chr10:8341299-8350274	ENSG00000236653.1,AC005235.1.1,lncRNA,chr2:198872331-198948066	ENSG00000221753.1,MIR1273A,miRNA,chr8:101105385-101105488	NA	0	0	0	0	0	0	0	0	0	0	0	0	0	0
ENSG00000172150.4,OR1A2,coding,chr17:3047562-3048492	NA	ENSG00000258747.1,RP11-163M18.1.1,lncRNA,chr14:44046359-44077466	ENSG00000232170.1,GS1-756B1.2.1,lncRNA,chr10:8341299-8350274	ENSG00000221753.1,MIR1273A,miRNA,chr8:101105385-101105488	NA	0	0	0	0	0	0	0	0	0	0	0	0	0	0
ENSG00000186119.6,OR5D18,coding,chr11:55343661-55344649	NA	ENSG00000227489.1,AC006458.3.1,lncRNA,chr7:15072356-15074801	ENSG00000234795.3,AC007275.2.1,lncRNA,chrY:7670635-7750901	ENSG00000221753.1,MIR1273A,miRNA,chr8:101105385-101105488	NA	0	0	0	0	0	0	0	0	0	1	0	0	0	1
ENSG00000244624.2,KRTAP20-1,coding,chr21:30910620-30910874	NA	ENSG00000227489.1,AC006458.3.1,lncRNA,chr7:15072356-15074801	ENSG00000234795.3,AC007275.2.1,lncRNA,chrY:7670635-7750901	ENSG00000221753.1,MIR1273A,miRNA,chr8:101105385-101105488	NA	0	0	0	0	0	0	0	0	0	1	0	0	0	1
ENSG00000186119.6,OR5D18,coding,chr11:55343661-55344649	NA	ENSG00000227489.1,AC006458.3.1,lncRNA,chr7:15072356-15074801	ENSG00000258881.1,AC007040.11.1,lncRNA,chr2:71028177-71075387	ENSG00000221753.1,MIR1273A,miRNA,chr8:101105385-101105488	NA	0	0	0	0	0	0	0	0	0	1	1	0	0	2
ENSG00000186119.6,OR5D18,coding,chr11:55343661-55344649	NA	ENSG00000227489.1,AC006458.3.1,lncRNA,chr7:15072356-15074801	ENSG00000254380.1,RP11-317J10.4.1,lncRNA,chr8:86623379-86639992	ENSG00000221753.1,MIR1273A,miRNA,chr8:101105385-101105488	NA	0	0	0	0	0	0	0	0	0	1	0	0	0	1
ENSG00000186119.6,OR5D18,coding,chr11:55343661-55344649	NA	ENSG00000227489.1,AC006458.3.1,lncRNA,chr7:15072356-15074801	ENSG00000243497.1,RP13-503K1.4.1,lncRNA,chr3:95277875-95283355	ENSG00000221753.1,MIR1273A,miRNA,chr8:101105385-101105488	NA	0	0	0	0	0	0	0	0	0	1	1	0	0	2
ENSG00000186119.6,OR5D18,coding,chr11:55343661-55344649	NA	ENSG00000227489.1,AC006458.3.1,lncRNA,chr7:15072356-15074801	ENSG00000236653.1,AC005235.1.1,lncRNA,chr2:198872331-198948066	ENSG00000221753.1,MIR1273A,miRNA,chr8:101105385-101105488	NA	0	0	0	0	0	0	0	0	0	1	0	0	0	1
ENSG00000186119.6,OR5D18,coding,chr11:55343661-55344649	NA	ENSG00000227489.1,AC006458.3.1,lncRNA,chr7:15072356-15074801	ENSG00000230768.1,RP11-251P6.1.1,lncRNA,chr1:105933838-105963080	ENSG00000221753.1,MIR1273A,miRNA,chr8:101105385-101105488	NA	0	0	0	0	0	0	0	0	0	1	0	0	0	1
ENSG00000186119.6,OR5D18,coding,chr11:55343661-55344649	ENSG00000253207.2,RP11-67H2.1.1,coding,chr8:114681714-114698363	ENSG00000227489.1,AC006458.3.1,lncRNA,chr7:15072356-15074801	NA	ENSG00000221753.1,MIR1273A,miRNA,chr8:101105385-101105488	NA	0	0	0	0	0	0	0	0	0	1	0	0	0	1
ENSG00000244624.2,KRTAP20-1,coding,chr21:30910620-30910874	NA	ENSG00000227489.1,AC006458.3.1,lncRNA,chr7:15072356-15074801	ENSG00000234686.1,AC010971.1.1,lncRNA,chr7:49240278-49264958	ENSG00000221753.1,MIR1273A,miRNA,chr8:101105385-101105488	NA	0	0	0	0	0	0	0	0	0	1	0	0	0	1
ENSG00000244624.2,KRTAP20-1,coding,chr21:30910620-30910874	NA	ENSG00000227489.1,AC006458.3.1,lncRNA,chr7:15072356-15074801	ENSG00000236828.1,DMD-AS3,lncRNA,chrX:32682977-32684438	ENSG00000221753.1,MIR1273A,miRNA,chr8:101105385-101105488	NA	0	0	0	0	0	0	0	0	0	1	0	0	0	1
ENSG00000186393.5,KRT26,coding,chr17:36176015-36181940	NA	ENSG00000232170.1,GS1-756B1.2.1,lncRNA,chr10:8341299-8350274	NA	ENSG00000221067.1,MIR1280,miRNA,chr3:129563697-129563791	ENSG00000221753.1,MIR1273A,miRNA,chr8:101105385-101105488	0	0	0	0	0	0	0	0	0	0	0	0	0	0
ENSG00000186393.5,KRT26,coding,chr17:36176015-36181940	NA	ENSG00000228488.1,AC092168.4.1,lncRNA,chr2:100705114-100705776	NA	ENSG00000221067.1,MIR1280,miRNA,chr3:129563697-129563791	ENSG00000221753.1,MIR1273A,miRNA,chr8:101105385-101105488	0	0	0	0	0	0	0	0	0	0	0	0	0	0
ENSG00000186393.5,KRT26,coding,chr17:36176015-36181940	NA	ENSG00000232170.1,GS1-756B1.2.1,lncRNA,chr10:8341299-8350274	ENSG00000228488.1,AC092168.4.1,lncRNA,chr2:100705114-100705776	ENSG00000221753.1,MIR1273A,miRNA,chr8:101105385-101105488	NA	0	0	0	0	0	0	0	0	0	0	0	0	0	0
ENSG00000174937.2,OR5M3,coding,chr11:55993539-55994590	NA	ENSG00000249343.1,CTD-2275D24.2.1,lncRNA,chr5:73654066-73659878	ENSG00000248942.1,CTD-2275D24.4.1,lncRNA,chr5:73637990-73639906	ENSG00000221753.1,MIR1273A,miRNA,chr8:101105385-101105488	NA	0	0	0	0	0	0	0	0	0	0	0	0	0	0
ENSG00000174937.2,OR5M3,coding,chr11:55993539-55994590	NA	ENSG00000251170.1,RP11-729M20.1.1,lncRNA,chr4:105370985-105551641	ENSG00000236653.1,AC005235.1.1,lncRNA,chr2:198872331-198948066	ENSG00000221753.1,MIR1273A,miRNA,chr8:101105385-101105488	NA	0	0	0	0	0	0	0	0	0	0	0	0	0	0
ENSG00000174937.2,OR5M3,coding,chr11:55993539-55994590	NA	ENSG00000242790.1,RP11-451G4.3.1,lncRNA,chr3:156491670-156494659	ENSG00000236653.1,AC005235.1.1,lncRNA,chr2:198872331-198948066	ENSG00000221753.1,MIR1273A,miRNA,chr8:101105385-101105488	NA	0	0	0	0	0	0	0	0	0	0	0	0	0	0
ENSG00000174937.2,OR5M3,coding,chr11:55993539-55994590	NA	ENSG00000248942.1,CTD-2275D24.4.1,lncRNA,chr5:73637990-73639906	ENSG00000249877.1,RP11-706F1.2.1,lncRNA,chr4:190446824-190449484	ENSG00000221753.1,MIR1273A,miRNA,chr8:101105385-101105488	NA	0	0	0	0	0	0	0	0	0	0	0	0	0	0
ENSG00000174937.2,OR5M3,coding,chr11:55993539-55994590	NA	ENSG00000236828.1,DMD-AS3,lncRNA,chrX:32682977-32684438	ENSG00000234686.1,AC010971.1.1,lncRNA,chr7:49240278-49264958	ENSG00000221753.1,MIR1273A,miRNA,chr8:101105385-101105488	NA	0	0	0	0	0	0	0	0	0	0	0	0	0	0
ENSG00000174937.2,OR5M3,coding,chr11:55993539-55994590	NA	ENSG00000250902.1,RP11-301H24.4.1,lncRNA,chr4:146655216-146657720	ENSG00000234686.1,AC010971.1.1,lncRNA,chr7:49240278-49264958	ENSG00000221753.1,MIR1273A,miRNA,chr8:101105385-101105488	NA	0	0	0	0	0	0	0	0	0	0	0	0	0	0
ENSG00000244624.2,KRTAP20-1,coding,chr21:30910620-30910874	ENSG00000174937.2,OR5M3,coding,chr11:55993539-55994590	ENSG00000234686.1,AC010971.1.1,lncRNA,chr7:49240278-49264958	NA	ENSG00000221753.1,MIR1273A,miRNA,chr8:101105385-101105488	NA	0	0	0	0	0	0	0	0	0	0	0	0	0	0
ENSG00000174937.2,OR5M3,coding,chr11:55993539-55994590	NA	ENSG00000233519.1,RP11-177F11.1.1,lncRNA,chr1:238630593-238631046	ENSG00000234686.1,AC010971.1.1,lncRNA,chr7:49240278-49264958	ENSG00000221753.1,MIR1273A,miRNA,chr8:101105385-101105488	NA	0	0	0	0	0	0	0	0	0	0	0	0	0	0
ENSG00000174937.2,OR5M3,coding,chr11:55993539-55994590	NA	ENSG00000250902.1,RP11-301H24.4.1,lncRNA,chr4:146655216-146657720	ENSG00000236653.1,AC005235.1.1,lncRNA,chr2:198872331-198948066	ENSG00000221753.1,MIR1273A,miRNA,chr8:101105385-101105488	NA	0	0	0	0	0	0	0	0	0	0	0	0	0	0
ENSG00000174937.2,OR5M3,coding,chr11:55993539-55994590	NA	ENSG00000233519.1,RP11-177F11.1.1,lncRNA,chr1:238630593-238631046	ENSG00000236653.1,AC005235.1.1,lncRNA,chr2:198872331-198948066	ENSG00000221753.1,MIR1273A,miRNA,chr8:101105385-101105488	NA	0	0	0	0	0	0	0	0	0	0	0	0	0	0
ENSG00000174937.2,OR5M3,coding,chr11:55993539-55994590	NA	ENSG00000236828.1,DMD-AS3,lncRNA,chrX:32682977-32684438	ENSG00000250902.1,RP11-301H24.4.1,lncRNA,chr4:146655216-146657720	ENSG00000221753.1,MIR1273A,miRNA,chr8:101105385-101105488	NA	0	0	0	0	0	0	0	0	0	0	0	0	0	0
ENSG00000244624.2,KRTAP20-1,coding,chr21:30910620-30910874	ENSG00000174937.2,OR5M3,coding,chr11:55993539-55994590	ENSG00000236828.1,DMD-AS3,lncRNA,chrX:32682977-32684438	NA	ENSG00000221753.1,MIR1273A,miRNA,chr8:101105385-101105488	NA	0	0	0	0	0	0	0	0	0	0	0	0	0	0
ENSG00000174937.2,OR5M3,coding,chr11:55993539-55994590	NA	ENSG00000236828.1,DMD-AS3,lncRNA,chrX:32682977-32684438	ENSG00000233519.1,RP11-177F11.1.1,lncRNA,chr1:238630593-238631046	ENSG00000221753.1,MIR1273A,miRNA,chr8:101105385-101105488	NA	0	0	0	0	0	0	0	0	0	0	0	0	0	0
ENSG00000174937.2,OR5M3,coding,chr11:55993539-55994590	NA	ENSG00000234116.1,RP11-261C10.1.1,lncRNA,chr1:241235769-241237393	ENSG00000250902.1,RP11-301H24.4.1,lncRNA,chr4:146655216-146657720	ENSG00000221753.1,MIR1273A,miRNA,chr8:101105385-101105488	NA	0	0	0	0	0	0	0	0	0	0	0	0	0	0
ENSG00000174937.2,OR5M3,coding,chr11:55993539-55994590	NA	ENSG00000233519.1,RP11-177F11.1.1,lncRNA,chr1:238630593-238631046	ENSG00000250902.1,RP11-301H24.4.1,lncRNA,chr4:146655216-146657720	ENSG00000221753.1,MIR1273A,miRNA,chr8:101105385-101105488	NA	0	0	0	0	0	0	0	0	0	0	0	0	0	0
ENSG00000186119.6,OR5D18,coding,chr11:55343661-55344649	NA	ENSG00000234795.3,AC007275.2.1,lncRNA,chrY:7670635-7750901	ENSG00000236653.1,AC005235.1.1,lncRNA,chr2:198872331-198948066	ENSG00000221753.1,MIR1273A,miRNA,chr8:101105385-101105488	NA	0	0	0	0	0	0	0	0	0	0	0	0	0	0
ENSG00000244624.2,KRTAP20-1,coding,chr21:30910620-30910874	NA	ENSG00000234795.3,AC007275.2.1,lncRNA,chrY:7670635-7750901	ENSG00000234686.1,AC010971.1.1,lncRNA,chr7:49240278-49264958	ENSG00000221753.1,MIR1273A,miRNA,chr8:101105385-101105488	NA	0	0	0	0	0	0	0	0	0	0	0	0	0	0
ENSG00000244624.2,KRTAP20-1,coding,chr21:30910620-30910874	NA	ENSG00000236828.1,DMD-AS3,lncRNA,chrX:32682977-32684438	ENSG00000234795.3,AC007275.2.1,lncRNA,chrY:7670635-7750901	ENSG00000221753.1,MIR1273A,miRNA,chr8:101105385-101105488	NA	0	0	0	0	0	0	0	0	0	0	0	0	0	0
ENSG00000255526.1,NEDD8-MDP1,coding,chr14:23753141-23771398	NA	ENSG00000255605.1,RP11-644L4.1.1,lncRNA,chr11:95070897-95073435	ENSG00000255179.1,RP11-324J3.1.1,lncRNA,chr11:7200739-7208670	ENSG00000221753.1,MIR1273A,miRNA,chr8:101105385-101105488	NA	0	0	0	0	0	0	0	0	0	0	0	0	0	0
ENSG00000186119.6,OR5D18,coding,chr11:55343661-55344649	NA	ENSG00000258747.1,RP11-163M18.1.1,lncRNA,chr14:44046359-44077466	ENSG00000258881.1,AC007040.11.1,lncRNA,chr2:71028177-71075387	ENSG00000221753.1,MIR1273A,miRNA,chr8:101105385-101105488	NA	0	0	0	0	0	0	0	0	0	0	1	0	0	1
ENSG00000147926.9,FAM75A3,coding,chr9:40690290-40696537	NA	ENSG00000232170.1,GS1-756B1.2.1,lncRNA,chr10:8341299-8350274	NA	ENSG00000221067.1,MIR1280,miRNA,chr3:129563697-129563791	ENSG00000221753.1,MIR1273A,miRNA,chr8:101105385-101105488	0	0	0	0	0	0	0	0	0	0	0	0	0	0
ENSG00000204300.2,TMEM225,coding,chr11:123258842-123261559	NA	ENSG00000230114.1,RP11-141A19.2.1,lncRNA,chr1:49495669-49507544	ENSG00000232170.1,GS1-756B1.2.1,lncRNA,chr10:8341299-8350274	ENSG00000221753.1,MIR1273A,miRNA,chr8:101105385-101105488	NA	0	0	0	0	0	0	0	0	0	0	0	0	0	0
ENSG00000244624.2,KRTAP20-1,coding,chr21:30910620-30910874	NA	ENSG00000236828.1,DMD-AS3,lncRNA,chrX:32682977-32684438	ENSG00000234686.1,AC010971.1.1,lncRNA,chr7:49240278-49264958	ENSG00000221753.1,MIR1273A,miRNA,chr8:101105385-101105488	NA	0	0	0	0	0	0	0	0	0	0	0	0	0	0
ENSG00000184724.4,KRTAP6-1,coding,chr21:30907620-30911767	NA	ENSG00000237843.1,AC016903.2.1,lncRNA,chr2:205048323-205080640	ENSG00000250949.1,RP11-492L8.2.1,lncRNA,chr5:116394794-116402164	ENSG00000221464.1,MIR1271,miRNA,chr5:175727554-175727640	NA	0	0	0	0	0	0	0	1	0	0	0	0	0	1
ENSG00000177151.3,OR2T35,coding,chr1:246868210-246869182	ENSG00000184724.4,KRTAP6-1,coding,chr21:30907620-30911767	ENSG00000250949.1,RP11-492L8.2.1,lncRNA,chr5:116394794-116402164	NA	ENSG00000221464.1,MIR1271,miRNA,chr5:175727554-175727640	NA	0	0	0	0	0	0	0	0	1	0	0	0	0	1
ENSG00000177151.3,OR2T35,coding,chr1:246868210-246869182	NA	ENSG00000250949.1,RP11-492L8.2.1,lncRNA,chr5:116394794-116402164	NA	ENSG00000221464.1,MIR1271,miRNA,chr5:175727554-175727640	ENSG00000207989.1,MIR493,miRNA,chr14:100405149-100405238	0	0	0	0	0	0	0	0	0	0	0	0	0	0
ENSG00000184724.4,KRTAP6-1,coding,chr21:30907620-30911767	ENSG00000214891.4,TRIM64C,coding,chr11:49031841-49037240	ENSG00000250949.1,RP11-492L8.2.1,lncRNA,chr5:116394794-116402164	NA	ENSG00000221464.1,MIR1271,miRNA,chr5:175727554-175727640	NA	0	0	0	0	0	0	0	1	1	0	0	0	0	2
ENSG00000184724.4,KRTAP6-1,coding,chr21:30907620-30911767	NA	ENSG00000250949.1,RP11-492L8.2.1,lncRNA,chr5:116394794-116402164	NA	ENSG00000221464.1,MIR1271,miRNA,chr5:175727554-175727640	ENSG00000207989.1,MIR493,miRNA,chr14:100405149-100405238	0	0	0	0	0	0	0	1	0	0	0	0	0	1
ENSG00000214891.4,TRIM64C,coding,chr11:49031841-49037240	NA	ENSG00000250949.1,RP11-492L8.2.1,lncRNA,chr5:116394794-116402164	NA	ENSG00000221464.1,MIR1271,miRNA,chr5:175727554-175727640	ENSG00000207989.1,MIR493,miRNA,chr14:100405149-100405238	0	0	0	0	0	0	0	1	0	0	0	0	0	1
ENSG00000256671.3,LIMS3L,coding,chr2:110641954-110665048	NA	ENSG00000250949.1,RP11-492L8.2.1,lncRNA,chr5:116394794-116402164	ENSG00000248330.1,RP11-782E2.1.1,lncRNA,chr4:137007587-137054285	ENSG00000199030.1,MIRLET7C,miRNA,chr21:16834013-16834107	NA	0	0	0	0	0	0	0	0	0	0	0	0	0	0
ENSG00000177151.3,OR2T35,coding,chr1:246868210-246869182	ENSG00000184724.4,KRTAP6-1,coding,chr21:30907620-30911767	ENSG00000250949.1,RP11-492L8.2.1,lncRNA,chr5:116394794-116402164	NA	ENSG00000207989.1,MIR493,miRNA,chr14:100405149-100405238	NA	0	0	0	0	0	0	0	0	1	0	0	0	0	1
ENSG00000184724.4,KRTAP6-1,coding,chr21:30907620-30911767	ENSG00000214891.4,TRIM64C,coding,chr11:49031841-49037240	ENSG00000250949.1,RP11-492L8.2.1,lncRNA,chr5:116394794-116402164	NA	ENSG00000207989.1,MIR493,miRNA,chr14:100405149-100405238	NA	0	0	0	0	0	0	0	1	1	0	0	0	0	2
ENSG00000257198.1,AL589645.1,coding,chr9:34822641-34828583	NA	ENSG00000237675.1,RP11-118H17.1.1,lncRNA,chr10:127252929-127257004	ENSG00000253855.1,AC133633.1.1,lncRNA,chr8:2363530-2366715	ENSG00000207996.1,MIR301A,miRNA,chr17:54583278-54583364	NA	0	0	0	0	0	0	0	0	0	0	0	0	0	0
ENSG00000214819.1,CDRT15L2,coding,chr17:20423628-20424816	NA	ENSG00000230720.1,RP11-14C22.6.1,lncRNA,chr10:31052185-31052675	ENSG00000253855.1,AC133633.1.1,lncRNA,chr8:2363530-2366715	ENSG00000199187.1,MIR365B,miRNA,chr17:26926542-26926653	NA	0	0	0	0	0	0	0	0	0	0	0	0	0	0
ENSG00000206106.2,KRTAP22-2,coding,chr21:30884294-30884587	NA	ENSG00000230720.1,RP11-14C22.6.1,lncRNA,chr10:31052185-31052675	ENSG00000253855.1,AC133633.1.1,lncRNA,chr8:2363530-2366715	ENSG00000199187.1,MIR365B,miRNA,chr17:26926542-26926653	NA	0	0	0	0	0	0	0	0	0	0	0	0	0	0
ENSG00000206106.2,KRTAP22-2,coding,chr21:30884294-30884587	NA	ENSG00000253855.1,AC133633.1.1,lncRNA,chr8:2363530-2366715	ENSG00000248799.1,CTC-548H10.2.1,lncRNA,chr5:127015283-127027620	ENSG00000199187.1,MIR365B,miRNA,chr17:26926542-26926653	NA	0	0	0	0	0	0	0	0	0	0	0	0	0	0
ENSG00000214819.1,CDRT15L2,coding,chr17:20423628-20424816	ENSG00000206106.2,KRTAP22-2,coding,chr21:30884294-30884587	ENSG00000253855.1,AC133633.1.1,lncRNA,chr8:2363530-2366715	NA	ENSG00000199187.1,MIR365B,miRNA,chr17:26926542-26926653	NA	0	0	0	0	0	0	0	0	0	0	0	0	0	0
ENSG00000206106.2,KRTAP22-2,coding,chr21:30884294-30884587	NA	ENSG00000253855.1,AC133633.1.1,lncRNA,chr8:2363530-2366715	NA	ENSG00000199187.1,MIR365B,miRNA,chr17:26926542-26926653	ENSG00000207597.1,MIR490,miRNA,chr7:136238453-136238581	0	0	0	0	0	0	0	0	0	0	0	0	0	0
ENSG00000184724.4,KRTAP6-1,coding,chr21:30907620-30911767	ENSG00000179709.3,NLRP8,coding,chr19:61151009-61191807	ENSG00000261075.1,RP11-243A14.3.1,lncRNA,chr16:9447367-9456863	NA	ENSG00000221464.1,MIR1271,miRNA,chr5:175727554-175727640	NA	0	0	0	0	0	0	0	1	0	0	0	0	0	1
ENSG00000184724.4,KRTAP6-1,coding,chr21:30907620-30911767	NA	ENSG00000253403.1,RP11-348M17.2.1,lncRNA,chr5:161046930-161048992	ENSG00000261075.1,RP11-243A14.3.1,lncRNA,chr16:9447367-9456863	ENSG00000221464.1,MIR1271,miRNA,chr5:175727554-175727640	NA	0	0	0	0	0	0	0	1	0	1	0	0	0	2
ENSG00000177151.3,OR2T35,coding,chr1:246868210-246869182	ENSG00000184724.4,KRTAP6-1,coding,chr21:30907620-30911767	ENSG00000261075.1,RP11-243A14.3.1,lncRNA,chr16:9447367-9456863	NA	ENSG00000221464.1,MIR1271,miRNA,chr5:175727554-175727640	NA	0	0	0	0	0	0	0	0	1	0	0	0	0	1
ENSG00000177151.3,OR2T35,coding,chr1:246868210-246869182	NA	ENSG00000261075.1,RP11-243A14.3.1,lncRNA,chr16:9447367-9456863	NA	ENSG00000221464.1,MIR1271,miRNA,chr5:175727554-175727640	ENSG00000207989.1,MIR493,miRNA,chr14:100405149-100405238	0	0	0	0	0	0	0	0	0	0	0	0	0	0
ENSG00000204279.3,PAGE3,coding,chrX:55301572-55308004	ENSG00000184724.4,KRTAP6-1,coding,chr21:30907620-30911767	ENSG00000261075.1,RP11-243A14.3.1,lncRNA,chr16:9447367-9456863	NA	ENSG00000221464.1,MIR1271,miRNA,chr5:175727554-175727640	NA	0	0	0	0	0	0	0	0	1	0	0	0	0	1
ENSG00000184724.4,KRTAP6-1,coding,chr21:30907620-30911767	NA	ENSG00000261075.1,RP11-243A14.3.1,lncRNA,chr16:9447367-9456863	NA	ENSG00000221464.1,MIR1271,miRNA,chr5:175727554-175727640	ENSG00000207989.1,MIR493,miRNA,chr14:100405149-100405238	0	0	0	0	0	0	0	1	0	0	0	0	0	1
ENSG00000150261.2,OR8K1,coding,chr11:55869996-55871083	NA	ENSG00000234686.1,AC010971.1.1,lncRNA,chr7:49240278-49264958	ENSG00000261075.1,RP11-243A14.3.1,lncRNA,chr16:9447367-9456863	ENSG00000221464.1,MIR1271,miRNA,chr5:175727554-175727640	NA	0	0	0	0	0	0	0	0	0	0	0	0	0	0
ENSG00000150261.2,OR8K1,coding,chr11:55869996-55871083	NA	ENSG00000261075.1,RP11-243A14.3.1,lncRNA,chr16:9447367-9456863	ENSG00000231597.1,AC007557.4.1,lncRNA,chr2:217427356-217428100	ENSG00000221464.1,MIR1271,miRNA,chr5:175727554-175727640	NA	0	0	0	0	0	0	0	0	0	0	0	0	0	0
ENSG00000150261.2,OR8K1,coding,chr11:55869996-55871083	NA	ENSG00000236828.1,DMD-AS3,lncRNA,chrX:32682977-32684438	ENSG00000261075.1,RP11-243A14.3.1,lncRNA,chr16:9447367-9456863	ENSG00000221464.1,MIR1271,miRNA,chr5:175727554-175727640	NA	0	0	0	0	0	0	0	0	0	0	0	0	0	0
ENSG00000150261.2,OR8K1,coding,chr11:55869996-55871083	NA	ENSG00000261075.1,RP11-243A14.3.1,lncRNA,chr16:9447367-9456863	NA	ENSG00000221464.1,MIR1271,miRNA,chr5:175727554-175727640	ENSG00000207989.1,MIR493,miRNA,chr14:100405149-100405238	0	0	0	0	0	0	0	0	0	0	0	0	0	0
ENSG00000150261.2,OR8K1,coding,chr11:55869996-55871083	NA	ENSG00000234116.1,RP11-261C10.1.1,lncRNA,chr1:241235769-241237393	ENSG00000261075.1,RP11-243A14.3.1,lncRNA,chr16:9447367-9456863	ENSG00000221464.1,MIR1271,miRNA,chr5:175727554-175727640	NA	0	0	0	0	0	0	0	0	0	0	0	0	0	0
ENSG00000150261.2,OR8K1,coding,chr11:55869996-55871083	NA	ENSG00000233519.1,RP11-177F11.1.1,lncRNA,chr1:238630593-238631046	ENSG00000261075.1,RP11-243A14.3.1,lncRNA,chr16:9447367-9456863	ENSG00000221464.1,MIR1271,miRNA,chr5:175727554-175727640	NA	0	0	0	0	0	0	0	0	0	0	0	0	0	0
ENSG00000184724.4,KRTAP6-1,coding,chr21:30907620-30911767	NA	ENSG00000253403.1,RP11-348M17.2.1,lncRNA,chr5:161046930-161048992	ENSG00000261075.1,RP11-243A14.3.1,lncRNA,chr16:9447367-9456863	ENSG00000207989.1,MIR493,miRNA,chr14:100405149-100405238	NA	0	0	0	0	0	0	0	1	0	1	0	0	0	2
ENSG00000177151.3,OR2T35,coding,chr1:246868210-246869182	ENSG00000184724.4,KRTAP6-1,coding,chr21:30907620-30911767	ENSG00000261075.1,RP11-243A14.3.1,lncRNA,chr16:9447367-9456863	NA	ENSG00000207989.1,MIR493,miRNA,chr14:100405149-100405238	NA	0	0	0	0	0	0	0	0	1	0	0	0	0	1
ENSG00000259164.1,RP11-463C8.4.1,coding,chr14:76634406-76761558	NA	ENSG00000257470.1,RP11-397H6.1.1,lncRNA,chr12:95941929-95969038	ENSG00000261176.1,RP11-2L4.1.1,lncRNA,chr16:81145154-81166316	ENSG00000207751.1,MIR130B,miRNA,chr22:20337592-20337674	NA	0	0	0	0	0	0	0	0	0	0	0	0	0	0
ENSG00000259164.1,RP11-463C8.4.1,coding,chr14:76634406-76761558	NA	ENSG00000258747.1,RP11-163M18.1.1,lncRNA,chr14:44046359-44077466	ENSG00000257470.1,RP11-397H6.1.1,lncRNA,chr12:95941929-95969038	ENSG00000207751.1,MIR130B,miRNA,chr22:20337592-20337674	NA	0	0	0	0	0	0	0	0	0	0	0	0	0	0
ENSG00000244624.2,KRTAP20-1,coding,chr21:30910620-30910874	NA	ENSG00000234540.1,RP3-448I9.1.1,lncRNA,chr6:14502535-14512499	ENSG00000231238.1,LINC00349,lncRNA,chr13:18012636-18022837	ENSG00000207964.1,MIR628,miRNA,chr15:53452429-53452524	NA	0	0	0	0	0	0	0	0	0	0	0	1	0	1
ENSG00000251546.1,IGKV1D-39,coding,chr2:89400495-89400995	NA	ENSG00000234540.1,RP3-448I9.1.1,lncRNA,chr6:14502535-14512499	NA	ENSG00000207964.1,MIR628,miRNA,chr15:53452429-53452524	ENSG00000215946.1,MIR941-1,miRNA,chr20:62021819-62021910	0	0	0	0	0	0	0	0	0	0	0	1	1	2
ENSG00000213578.4,CPLX3,coding,chr15:72905940-72911194	NA	ENSG00000225070.1,LL22NC03-23C6.13.1,lncRNA,chr22:20720742-20724463	ENSG00000258254.1,RP11-162N7.1.1,lncRNA,chr12:113543948-113545110	ENSG00000208017.1,MIR140,miRNA,chr16:68524484-68524584	NA	0	0	0	0	0	0	0	0	0	0	0	0	0	0
ENSG00000213578.4,CPLX3,coding,chr15:72905940-72911194	NA	ENSG00000225070.1,LL22NC03-23C6.13.1,lncRNA,chr22:20720742-20724463	ENSG00000225378.1,AC015977.6.1,lncRNA,chr2:26747625-26750836	ENSG00000252466.1,MIR2115,miRNA,chr3:48332853-48332953	NA	0	0	0	0	0	0	0	0	0	0	0	0	0	0
ENSG00000213578.4,CPLX3,coding,chr15:72905940-72911194	NA	ENSG00000225070.1,LL22NC03-23C6.13.1,lncRNA,chr22:20720742-20724463	ENSG00000249343.1,CTD-2275D24.2.1,lncRNA,chr5:73654066-73659878	ENSG00000252466.1,MIR2115,miRNA,chr3:48332853-48332953	NA	0	0	0	0	0	0	0	0	0	0	0	0	0	0
ENSG00000213578.4,CPLX3,coding,chr15:72905940-72911194	NA	ENSG00000225070.1,LL22NC03-23C6.13.1,lncRNA,chr22:20720742-20724463	ENSG00000232624.1,RP11-478H13.3.1,lncRNA,chr10:29135881-29137154	ENSG00000252466.1,MIR2115,miRNA,chr3:48332853-48332953	NA	0	0	0	0	0	0	0	0	0	0	0	0	0	0
ENSG00000213578.4,CPLX3,coding,chr15:72905940-72911194	NA	ENSG00000225070.1,LL22NC03-23C6.13.1,lncRNA,chr22:20720742-20724463	ENSG00000251170.1,RP11-729M20.1.1,lncRNA,chr4:105370985-105551641	ENSG00000252466.1,MIR2115,miRNA,chr3:48332853-48332953	NA	0	0	0	0	0	0	0	0	0	0	0	0	0	0
ENSG00000213578.4,CPLX3,coding,chr15:72905940-72911194	NA	ENSG00000225070.1,LL22NC03-23C6.13.1,lncRNA,chr22:20720742-20724463	ENSG00000242790.1,RP11-451G4.3.1,lncRNA,chr3:156491670-156494659	ENSG00000252466.1,MIR2115,miRNA,chr3:48332853-48332953	NA	0	0	0	0	0	0	0	0	0	0	0	0	0	0
ENSG00000213578.4,CPLX3,coding,chr15:72905940-72911194	NA	ENSG00000225070.1,LL22NC03-23C6.13.1,lncRNA,chr22:20720742-20724463	ENSG00000248942.1,CTD-2275D24.4.1,lncRNA,chr5:73637990-73639906	ENSG00000252466.1,MIR2115,miRNA,chr3:48332853-48332953	NA	0	0	0	0	0	0	0	0	0	0	0	0	0	0
ENSG00000213578.4,CPLX3,coding,chr15:72905940-72911194	NA	ENSG00000225070.1,LL22NC03-23C6.13.1,lncRNA,chr22:20720742-20724463	ENSG00000234686.1,AC010971.1.1,lncRNA,chr7:49240278-49264958	ENSG00000252466.1,MIR2115,miRNA,chr3:48332853-48332953	NA	0	0	0	0	0	0	0	0	0	0	0	0	0	0
ENSG00000213578.4,CPLX3,coding,chr15:72905940-72911194	NA	ENSG00000225070.1,LL22NC03-23C6.13.1,lncRNA,chr22:20720742-20724463	NA	ENSG00000208017.1,MIR140,miRNA,chr16:68524484-68524584	ENSG00000252466.1,MIR2115,miRNA,chr3:48332853-48332953	0	0	0	0	0	0	0	0	0	0	0	0	0	0
ENSG00000213578.4,CPLX3,coding,chr15:72905940-72911194	NA	ENSG00000225070.1,LL22NC03-23C6.13.1,lncRNA,chr22:20720742-20724463	ENSG00000236653.1,AC005235.1.1,lncRNA,chr2:198872331-198948066	ENSG00000252466.1,MIR2115,miRNA,chr3:48332853-48332953	NA	0	0	0	0	0	0	0	0	0	0	0	0	0	0
ENSG00000213578.4,CPLX3,coding,chr15:72905940-72911194	NA	ENSG00000225070.1,LL22NC03-23C6.13.1,lncRNA,chr22:20720742-20724463	ENSG00000236828.1,DMD-AS3,lncRNA,chrX:32682977-32684438	ENSG00000252466.1,MIR2115,miRNA,chr3:48332853-48332953	NA	0	0	0	0	0	0	0	0	0	0	0	0	0	0
ENSG00000213578.4,CPLX3,coding,chr15:72905940-72911194	ENSG00000105398.3,SULT2A1,coding,chr19:53065534-53081466	ENSG00000225070.1,LL22NC03-23C6.13.1,lncRNA,chr22:20720742-20724463	NA	ENSG00000252466.1,MIR2115,miRNA,chr3:48332853-48332953	NA	0	0	0	0	0	0	0	0	0	0	0	0	0	0
ENSG00000213578.4,CPLX3,coding,chr15:72905940-72911194	NA	ENSG00000225070.1,LL22NC03-23C6.13.1,lncRNA,chr22:20720742-20724463	ENSG00000250902.1,RP11-301H24.4.1,lncRNA,chr4:146655216-146657720	ENSG00000252466.1,MIR2115,miRNA,chr3:48332853-48332953	NA	0	0	0	0	0	0	0	0	0	0	0	0	0	0
ENSG00000213578.4,CPLX3,coding,chr15:72905940-72911194	NA	ENSG00000225070.1,LL22NC03-23C6.13.1,lncRNA,chr22:20720742-20724463	ENSG00000226364.1,AC102948.2.1,lncRNA,chr17:48294479-48331947	ENSG00000252466.1,MIR2115,miRNA,chr3:48332853-48332953	NA	0	0	0	0	0	0	0	0	0	0	0	0	0	0
ENSG00000213578.4,CPLX3,coding,chr15:72905940-72911194	NA	ENSG00000225070.1,LL22NC03-23C6.13.1,lncRNA,chr22:20720742-20724463	ENSG00000232464.1,CTA-125H2.1.1,lncRNA,chr22:24685039-24709492	ENSG00000252466.1,MIR2115,miRNA,chr3:48332853-48332953	NA	0	0	0	0	0	0	0	0	0	0	0	0	0	0
ENSG00000213578.4,CPLX3,coding,chr15:72905940-72911194	NA	ENSG00000225070.1,LL22NC03-23C6.13.1,lncRNA,chr22:20720742-20724463	ENSG00000250446.1,CTD-2275D24.3.1,lncRNA,chr5:73659575-73666347	ENSG00000252466.1,MIR2115,miRNA,chr3:48332853-48332953	NA	0	0	0	0	0	0	0	0	0	0	0	0	0	0
ENSG00000213578.4,CPLX3,coding,chr15:72905940-72911194	NA	ENSG00000225070.1,LL22NC03-23C6.13.1,lncRNA,chr22:20720742-20724463	ENSG00000240777.2,RP11-58O15.1.1,lncRNA,chr3:55619670-55622172	ENSG00000252466.1,MIR2115,miRNA,chr3:48332853-48332953	NA	0	0	0	0	0	0	0	0	0	0	0	0	0	0
ENSG00000213578.4,CPLX3,coding,chr15:72905940-72911194	NA	ENSG00000225070.1,LL22NC03-23C6.13.1,lncRNA,chr22:20720742-20724463	ENSG00000237556.1,KCND3-AS1,lncRNA,chr1:112253480-112255076	ENSG00000252466.1,MIR2115,miRNA,chr3:48332853-48332953	NA	0	0	0	0	0	0	0	0	0	0	0	0	0	0
ENSG00000213578.4,CPLX3,coding,chr15:72905940-72911194	NA	ENSG00000225070.1,LL22NC03-23C6.13.1,lncRNA,chr22:20720742-20724463	ENSG00000249877.1,RP11-706F1.2.1,lncRNA,chr4:190446824-190449484	ENSG00000252466.1,MIR2115,miRNA,chr3:48332853-48332953	NA	0	0	0	0	0	0	0	0	0	0	0	0	0	0
ENSG00000213578.4,CPLX3,coding,chr15:72905940-72911194	NA	ENSG00000225070.1,LL22NC03-23C6.13.1,lncRNA,chr22:20720742-20724463	ENSG00000234116.1,RP11-261C10.1.1,lncRNA,chr1:241235769-241237393	ENSG00000252466.1,MIR2115,miRNA,chr3:48332853-48332953	NA	0	0	0	0	0	0	0	0	0	0	0	0	0	0
ENSG00000213578.4,CPLX3,coding,chr15:72905940-72911194	NA	ENSG00000225070.1,LL22NC03-23C6.13.1,lncRNA,chr22:20720742-20724463	ENSG00000233519.1,RP11-177F11.1.1,lncRNA,chr1:238630593-238631046	ENSG00000252466.1,MIR2115,miRNA,chr3:48332853-48332953	NA	0	0	0	0	0	0	0	0	0	0	0	0	0	0
ENSG00000213578.4,CPLX3,coding,chr15:72905940-72911194	NA	ENSG00000225070.1,LL22NC03-23C6.13.1,lncRNA,chr22:20720742-20724463	ENSG00000232624.1,RP11-478H13.3.1,lncRNA,chr10:29135881-29137154	ENSG00000208017.1,MIR140,miRNA,chr16:68524484-68524584	NA	0	0	0	0	0	0	0	0	0	0	0	0	0	0
ENSG00000213578.4,CPLX3,coding,chr15:72905940-72911194	NA	ENSG00000225070.1,LL22NC03-23C6.13.1,lncRNA,chr22:20720742-20724463	ENSG00000226364.1,AC102948.2.1,lncRNA,chr17:48294479-48331947	ENSG00000208017.1,MIR140,miRNA,chr16:68524484-68524584	NA	0	0	0	0	0	0	0	0	0	0	0	0	0	0
ENSG00000213578.4,CPLX3,coding,chr15:72905940-72911194	NA	ENSG00000225070.1,LL22NC03-23C6.13.1,lncRNA,chr22:20720742-20724463	ENSG00000232464.1,CTA-125H2.1.1,lncRNA,chr22:24685039-24709492	ENSG00000208017.1,MIR140,miRNA,chr16:68524484-68524584	NA	0	0	0	0	0	0	0	0	0	0	0	0	0	0
ENSG00000213578.4,CPLX3,coding,chr15:72905940-72911194	NA	ENSG00000225070.1,LL22NC03-23C6.13.1,lncRNA,chr22:20720742-20724463	ENSG00000240777.2,RP11-58O15.1.1,lncRNA,chr3:55619670-55622172	ENSG00000208017.1,MIR140,miRNA,chr16:68524484-68524584	NA	0	0	0	0	0	0	0	0	0	0	0	0	0	0
ENSG00000183054.6,RGPD6,coding,chr2:110705925-111051231	NA	ENSG00000225070.1,LL22NC03-23C6.13.1,lncRNA,chr22:20720742-20724463	ENSG00000232624.1,RP11-478H13.3.1,lncRNA,chr10:29135881-29137154	ENSG00000252466.1,MIR2115,miRNA,chr3:48332853-48332953	NA	0	0	0	0	0	0	0	0	0	0	0	0	0	0
ENSG00000105398.3,SULT2A1,coding,chr19:53065534-53081466	NA	ENSG00000225070.1,LL22NC03-23C6.13.1,lncRNA,chr22:20720742-20724463	ENSG00000232624.1,RP11-478H13.3.1,lncRNA,chr10:29135881-29137154	ENSG00000252466.1,MIR2115,miRNA,chr3:48332853-48332953	NA	0	0	0	0	0	0	0	0	0	0	0	0	0	0
ENSG00000105392.7,CRX,coding,chr19:53014514-53056581	NA	ENSG00000225070.1,LL22NC03-23C6.13.1,lncRNA,chr22:20720742-20724463	ENSG00000232624.1,RP11-478H13.3.1,lncRNA,chr10:29135881-29137154	ENSG00000252466.1,MIR2115,miRNA,chr3:48332853-48332953	NA	0	0	0	0	0	0	0	0	0	0	0	0	0	0
ENSG00000105398.3,SULT2A1,coding,chr19:53065534-53081466	NA	ENSG00000225070.1,LL22NC03-23C6.13.1,lncRNA,chr22:20720742-20724463	ENSG00000232464.1,CTA-125H2.1.1,lncRNA,chr22:24685039-24709492	ENSG00000252466.1,MIR2115,miRNA,chr3:48332853-48332953	NA	0	0	0	0	0	0	0	0	0	0	0	0	0	0
ENSG00000177151.3,OR2T35,coding,chr1:246868210-246869182	ENSG00000184724.4,KRTAP6-1,coding,chr21:30907620-30911767	ENSG00000240152.2,RP11-16N2.1.1,lncRNA,chr4:61691968-61702275	NA	ENSG00000221464.1,MIR1271,miRNA,chr5:175727554-175727640	NA	0	0	0	0	0	0	0	0	1	0	0	0	0	1
ENSG00000177151.3,OR2T35,coding,chr1:246868210-246869182	NA	ENSG00000240152.2,RP11-16N2.1.1,lncRNA,chr4:61691968-61702275	NA	ENSG00000221464.1,MIR1271,miRNA,chr5:175727554-175727640	ENSG00000207989.1,MIR493,miRNA,chr14:100405149-100405238	0	0	0	0	0	0	0	0	0	0	0	0	0	0
ENSG00000184724.4,KRTAP6-1,coding,chr21:30907620-30911767	NA	ENSG00000240152.2,RP11-16N2.1.1,lncRNA,chr4:61691968-61702275	NA	ENSG00000221464.1,MIR1271,miRNA,chr5:175727554-175727640	ENSG00000207989.1,MIR493,miRNA,chr14:100405149-100405238	0	0	0	0	0	0	0	1	0	0	0	0	0	1
ENSG00000177151.3,OR2T35,coding,chr1:246868210-246869182	ENSG00000184724.4,KRTAP6-1,coding,chr21:30907620-30911767	ENSG00000240152.2,RP11-16N2.1.1,lncRNA,chr4:61691968-61702275	NA	ENSG00000207989.1,MIR493,miRNA,chr14:100405149-100405238	NA	0	0	0	0	0	0	0	0	1	0	0	0	0	1
ENSG00000177243.3,DEFB103B,coding,chr8:7273819-7275280	NA	ENSG00000230051.1,CTA-929C8.8.1,lncRNA,chr22:26057747-26105226	ENSG00000231238.1,LINC00349,lncRNA,chr13:18012636-18022837	ENSG00000221410.1,MIR1238,miRNA,chr19:10523797-10523880	NA	0	0	0	0	0	0	0	0	0	0	0	0	0	0
ENSG00000177243.3,DEFB103B,coding,chr8:7273819-7275280	NA	ENSG00000232806.1,AP001610.9.1,lncRNA,chr21:41852921-41856755	ENSG00000231238.1,LINC00349,lncRNA,chr13:18012636-18022837	ENSG00000221410.1,MIR1238,miRNA,chr19:10523797-10523880	NA	0	0	0	0	0	0	0	0	0	0	0	0	0	0
ENSG00000177243.3,DEFB103B,coding,chr8:7273819-7275280	NA	ENSG00000234116.1,RP11-261C10.1.1,lncRNA,chr1:241235769-241237393	ENSG00000231238.1,LINC00349,lncRNA,chr13:18012636-18022837	ENSG00000221410.1,MIR1238,miRNA,chr19:10523797-10523880	NA	0	0	0	0	0	0	0	0	0	0	0	0	0	0
ENSG00000177243.3,DEFB103B,coding,chr8:7273819-7275280	NA	ENSG00000233519.1,RP11-177F11.1.1,lncRNA,chr1:238630593-238631046	ENSG00000231238.1,LINC00349,lncRNA,chr13:18012636-18022837	ENSG00000221410.1,MIR1238,miRNA,chr19:10523797-10523880	NA	0	0	0	0	0	0	0	0	0	0	0	0	0	0
ENSG00000177243.3,DEFB103B,coding,chr8:7273819-7275280	NA	ENSG00000223626.1,RP11-315H15.1.1,lncRNA,chr13:112024881-112033540	ENSG00000234686.1,AC010971.1.1,lncRNA,chr7:49240278-49264958	ENSG00000221410.1,MIR1238,miRNA,chr19:10523797-10523880	NA	0	0	0	0	0	0	0	0	0	0	0	0	0	0
ENSG00000177243.3,DEFB103B,coding,chr8:7273819-7275280	NA	ENSG00000223626.1,RP11-315H15.1.1,lncRNA,chr13:112024881-112033540	ENSG00000231597.1,AC007557.4.1,lncRNA,chr2:217427356-217428100	ENSG00000221410.1,MIR1238,miRNA,chr19:10523797-10523880	NA	0	0	0	0	0	0	0	0	0	0	0	0	0	0
ENSG00000177243.3,DEFB103B,coding,chr8:7273819-7275280	NA	ENSG00000223626.1,RP11-315H15.1.1,lncRNA,chr13:112024881-112033540	ENSG00000232806.1,AP001610.9.1,lncRNA,chr21:41852921-41856755	ENSG00000221410.1,MIR1238,miRNA,chr19:10523797-10523880	NA	0	0	0	0	0	0	0	0	0	0	0	0	0	0
ENSG00000177243.3,DEFB103B,coding,chr8:7273819-7275280	NA	ENSG00000223626.1,RP11-315H15.1.1,lncRNA,chr13:112024881-112033540	ENSG00000234116.1,RP11-261C10.1.1,lncRNA,chr1:241235769-241237393	ENSG00000221410.1,MIR1238,miRNA,chr19:10523797-10523880	NA	0	0	0	0	0	0	0	0	0	0	0	0	0	0
ENSG00000177243.3,DEFB103B,coding,chr8:7273819-7275280	NA	ENSG00000223626.1,RP11-315H15.1.1,lncRNA,chr13:112024881-112033540	ENSG00000233519.1,RP11-177F11.1.1,lncRNA,chr1:238630593-238631046	ENSG00000221410.1,MIR1238,miRNA,chr19:10523797-10523880	NA	0	0	0	0	0	0	0	0	0	0	0	0	0	0
ENSG00000177243.3,DEFB103B,coding,chr8:7273819-7275280	NA	ENSG00000230051.1,CTA-929C8.8.1,lncRNA,chr22:26057747-26105226	ENSG00000236436.1,AC012361.1.1,lncRNA,chr2:20923011-20924902	ENSG00000221410.1,MIR1238,miRNA,chr19:10523797-10523880	NA	0	0	0	0	0	0	0	0	0	0	0	0	0	0
ENSG00000150261.2,OR8K1,coding,chr11:55869996-55871083	ENSG00000177243.3,DEFB103B,coding,chr8:7273819-7275280	ENSG00000236436.1,AC012361.1.1,lncRNA,chr2:20923011-20924902	NA	ENSG00000221410.1,MIR1238,miRNA,chr19:10523797-10523880	NA	0	0	0	0	0	0	0	0	0	0	0	0	0	0
ENSG00000177243.3,DEFB103B,coding,chr8:7273819-7275280	NA	ENSG00000234116.1,RP11-261C10.1.1,lncRNA,chr1:241235769-241237393	ENSG00000236436.1,AC012361.1.1,lncRNA,chr2:20923011-20924902	ENSG00000221410.1,MIR1238,miRNA,chr19:10523797-10523880	NA	0	0	0	0	0	0	0	0	0	0	0	0	0	0
ENSG00000177243.3,DEFB103B,coding,chr8:7273819-7275280	NA	ENSG00000233519.1,RP11-177F11.1.1,lncRNA,chr1:238630593-238631046	ENSG00000236436.1,AC012361.1.1,lncRNA,chr2:20923011-20924902	ENSG00000221410.1,MIR1238,miRNA,chr19:10523797-10523880	NA	0	0	0	0	0	0	0	0	0	0	0	0	0	0
ENSG00000177243.3,DEFB103B,coding,chr8:7273819-7275280	NA	ENSG00000234686.1,AC010971.1.1,lncRNA,chr7:49240278-49264958	ENSG00000231597.1,AC007557.4.1,lncRNA,chr2:217427356-217428100	ENSG00000221410.1,MIR1238,miRNA,chr19:10523797-10523880	NA	0	0	0	0	0	0	0	0	0	0	0	0	0	0
ENSG00000177243.3,DEFB103B,coding,chr8:7273819-7275280	ENSG00000259680.2,AC136428.1.1,coding,chr16:33554544-33555426	ENSG00000234686.1,AC010971.1.1,lncRNA,chr7:49240278-49264958	NA	ENSG00000221410.1,MIR1238,miRNA,chr19:10523797-10523880	NA	0	0	0	0	0	0	0	0	0	0	0	0	0	0
ENSG00000150261.2,OR8K1,coding,chr11:55869996-55871083	ENSG00000177243.3,DEFB103B,coding,chr8:7273819-7275280	ENSG00000234686.1,AC010971.1.1,lncRNA,chr7:49240278-49264958	NA	ENSG00000221410.1,MIR1238,miRNA,chr19:10523797-10523880	NA	0	0	0	0	0	0	0	0	0	0	0	0	0	0
ENSG00000177243.3,DEFB103B,coding,chr8:7273819-7275280	NA	ENSG00000233519.1,RP11-177F11.1.1,lncRNA,chr1:238630593-238631046	ENSG00000234686.1,AC010971.1.1,lncRNA,chr7:49240278-49264958	ENSG00000221410.1,MIR1238,miRNA,chr19:10523797-10523880	NA	0	0	0	0	0	0	0	0	0	0	0	0	0	0
ENSG00000177243.3,DEFB103B,coding,chr8:7273819-7275280	ENSG00000259680.2,AC136428.1.1,coding,chr16:33554544-33555426	ENSG00000231597.1,AC007557.4.1,lncRNA,chr2:217427356-217428100	NA	ENSG00000221410.1,MIR1238,miRNA,chr19:10523797-10523880	NA	0	0	0	0	0	0	0	0	0	0	0	0	0	0
ENSG00000177243.3,DEFB103B,coding,chr8:7273819-7275280	NA	ENSG00000231597.1,AC007557.4.1,lncRNA,chr2:217427356-217428100	ENSG00000250263.1,RP11-765K14.1.1,lncRNA,chr4:178033849-178038753	ENSG00000221410.1,MIR1238,miRNA,chr19:10523797-10523880	NA	0	0	0	0	0	0	0	0	0	0	0	0	0	0
ENSG00000150261.2,OR8K1,coding,chr11:55869996-55871083	ENSG00000177243.3,DEFB103B,coding,chr8:7273819-7275280	ENSG00000231597.1,AC007557.4.1,lncRNA,chr2:217427356-217428100	NA	ENSG00000221410.1,MIR1238,miRNA,chr19:10523797-10523880	NA	0	0	0	0	0	0	0	0	0	0	0	0	0	0
ENSG00000177243.3,DEFB103B,coding,chr8:7273819-7275280	NA	ENSG00000233519.1,RP11-177F11.1.1,lncRNA,chr1:238630593-238631046	ENSG00000231597.1,AC007557.4.1,lncRNA,chr2:217427356-217428100	ENSG00000221410.1,MIR1238,miRNA,chr19:10523797-10523880	NA	0	0	0	0	0	0	0	0	0	0	0	0	0	0
ENSG00000177243.3,DEFB103B,coding,chr8:7273819-7275280	ENSG00000259680.2,AC136428.1.1,coding,chr16:33554544-33555426	ENSG00000232806.1,AP001610.9.1,lncRNA,chr21:41852921-41856755	NA	ENSG00000221410.1,MIR1238,miRNA,chr19:10523797-10523880	NA	0	0	0	0	0	0	0	0	0	0	0	0	0	0
ENSG00000177243.3,DEFB103B,coding,chr8:7273819-7275280	NA	ENSG00000232806.1,AP001610.9.1,lncRNA,chr21:41852921-41856755	ENSG00000250263.1,RP11-765K14.1.1,lncRNA,chr4:178033849-178038753	ENSG00000221410.1,MIR1238,miRNA,chr19:10523797-10523880	NA	0	0	0	0	0	0	0	0	0	0	0	0	0	0
ENSG00000177243.3,DEFB103B,coding,chr8:7273819-7275280	NA	ENSG00000232806.1,AP001610.9.1,lncRNA,chr21:41852921-41856755	ENSG00000233519.1,RP11-177F11.1.1,lncRNA,chr1:238630593-238631046	ENSG00000221410.1,MIR1238,miRNA,chr19:10523797-10523880	NA	0	0	0	0	0	0	0	0	0	0	0	0	0	0
ENSG00000177243.3,DEFB103B,coding,chr8:7273819-7275280	ENSG00000259680.2,AC136428.1.1,coding,chr16:33554544-33555426	ENSG00000234116.1,RP11-261C10.1.1,lncRNA,chr1:241235769-241237393	NA	ENSG00000221410.1,MIR1238,miRNA,chr19:10523797-10523880	NA	0	0	0	0	0	0	0	0	0	0	0	0	0	0
ENSG00000177243.3,DEFB103B,coding,chr8:7273819-7275280	ENSG00000259680.2,AC136428.1.1,coding,chr16:33554544-33555426	ENSG00000233519.1,RP11-177F11.1.1,lncRNA,chr1:238630593-238631046	NA	ENSG00000221410.1,MIR1238,miRNA,chr19:10523797-10523880	NA	0	0	0	0	0	0	0	0	0	0	0	0	0	0
ENSG00000177243.3,DEFB103B,coding,chr8:7273819-7275280	NA	ENSG00000234116.1,RP11-261C10.1.1,lncRNA,chr1:241235769-241237393	ENSG00000250263.1,RP11-765K14.1.1,lncRNA,chr4:178033849-178038753	ENSG00000221410.1,MIR1238,miRNA,chr19:10523797-10523880	NA	0	0	0	0	0	0	0	0	0	0	0	0	0	0
ENSG00000177243.3,DEFB103B,coding,chr8:7273819-7275280	NA	ENSG00000233519.1,RP11-177F11.1.1,lncRNA,chr1:238630593-238631046	ENSG00000250263.1,RP11-765K14.1.1,lncRNA,chr4:178033849-178038753	ENSG00000221410.1,MIR1238,miRNA,chr19:10523797-10523880	NA	0	0	0	0	0	0	0	0	0	0	0	0	0	0
ENSG00000150261.2,OR8K1,coding,chr11:55869996-55871083	ENSG00000177243.3,DEFB103B,coding,chr8:7273819-7275280	ENSG00000234116.1,RP11-261C10.1.1,lncRNA,chr1:241235769-241237393	NA	ENSG00000221410.1,MIR1238,miRNA,chr19:10523797-10523880	NA	0	0	0	0	0	0	0	0	0	0	0	0	0	0
ENSG00000150261.2,OR8K1,coding,chr11:55869996-55871083	ENSG00000177243.3,DEFB103B,coding,chr8:7273819-7275280	ENSG00000233519.1,RP11-177F11.1.1,lncRNA,chr1:238630593-238631046	NA	ENSG00000221410.1,MIR1238,miRNA,chr19:10523797-10523880	NA	0	0	0	0	0	0	0	0	0	0	0	0	0	0
ENSG00000214819.1,CDRT15L2,coding,chr17:20423628-20424816	NA	ENSG00000230720.1,RP11-14C22.6.1,lncRNA,chr10:31052185-31052675	ENSG00000237224.1,RP11-109A6.2.1,lncRNA,chr10:131388969-131389516	ENSG00000199187.1,MIR365B,miRNA,chr17:26926542-26926653	NA	0	0	0	0	0	0	0	0	0	0	0	0	0	0
ENSG00000206106.2,KRTAP22-2,coding,chr21:30884294-30884587	NA	ENSG00000230720.1,RP11-14C22.6.1,lncRNA,chr10:31052185-31052675	ENSG00000237224.1,RP11-109A6.2.1,lncRNA,chr10:131388969-131389516	ENSG00000199187.1,MIR365B,miRNA,chr17:26926542-26926653	NA	0	0	0	0	0	0	0	0	0	0	0	0	0	0
ENSG00000214819.1,CDRT15L2,coding,chr17:20423628-20424816	ENSG00000206106.2,KRTAP22-2,coding,chr21:30884294-30884587	ENSG00000237224.1,RP11-109A6.2.1,lncRNA,chr10:131388969-131389516	NA	ENSG00000199187.1,MIR365B,miRNA,chr17:26926542-26926653	NA	0	0	0	0	0	0	0	0	0	0	0	0	0	0
ENSG00000229974.1,AC083862.1,coding,chr7:134483336-134483456	NA	ENSG00000233516.1,RP11-388N2.1.1,lncRNA,chr9:119264392-119268359	ENSG00000228277.1,AC112518.3.1,lncRNA,chr4:74794882-74799108	ENSG00000221091.1,MIR1302-5,miRNA,chr20:48664579-48664729	NA	0	0	0	0	0	0	0	0	0	0	0	0	0	0
ENSG00000229974.1,AC083862.1,coding,chr7:134483336-134483456	NA	ENSG00000233516.1,RP11-388N2.1.1,lncRNA,chr9:119264392-119268359	ENSG00000234172.1,AC093639.1.1,lncRNA,chr2:184477500-184522084	ENSG00000221091.1,MIR1302-5,miRNA,chr20:48664579-48664729	NA	0	0	0	0	0	0	0	0	0	0	0	0	0	0
ENSG00000229974.1,AC083862.1,coding,chr7:134483336-134483456	ENSG00000211783.3,TRAV9-1,coding,chr14:21349513-21349989	ENSG00000233516.1,RP11-388N2.1.1,lncRNA,chr9:119264392-119268359	NA	ENSG00000221091.1,MIR1302-5,miRNA,chr20:48664579-48664729	NA	0	0	0	0	0	0	0	0	0	0	0	0	0	0
ENSG00000229974.1,AC083862.1,coding,chr7:134483336-134483456	NA	ENSG00000231413.1,RP11-193P11.3.1,lncRNA,chr1:48317045-48320455	ENSG00000228277.1,AC112518.3.1,lncRNA,chr4:74794882-74799108	ENSG00000221091.1,MIR1302-5,miRNA,chr20:48664579-48664729	NA	0	0	0	0	0	0	0	0	0	0	0	0	0	0
ENSG00000229974.1,AC083862.1,coding,chr7:134483336-134483456	NA	ENSG00000228277.1,AC112518.3.1,lncRNA,chr4:74794882-74799108	ENSG00000234172.1,AC093639.1.1,lncRNA,chr2:184477500-184522084	ENSG00000221091.1,MIR1302-5,miRNA,chr20:48664579-48664729	NA	0	0	0	0	0	0	0	0	0	0	0	0	0	0
ENSG00000229974.1,AC083862.1,coding,chr7:134483336-134483456	ENSG00000211783.3,TRAV9-1,coding,chr14:21349513-21349989	ENSG00000228277.1,AC112518.3.1,lncRNA,chr4:74794882-74799108	NA	ENSG00000221091.1,MIR1302-5,miRNA,chr20:48664579-48664729	NA	0	0	0	0	0	0	0	0	0	0	0	0	0	0
ENSG00000229974.1,AC083862.1,coding,chr7:134483336-134483456	NA	ENSG00000231413.1,RP11-193P11.3.1,lncRNA,chr1:48317045-48320455	ENSG00000234172.1,AC093639.1.1,lncRNA,chr2:184477500-184522084	ENSG00000221091.1,MIR1302-5,miRNA,chr20:48664579-48664729	NA	0	0	0	0	0	0	0	0	0	0	0	0	0	0
ENSG00000229974.1,AC083862.1,coding,chr7:134483336-134483456	ENSG00000211783.3,TRAV9-1,coding,chr14:21349513-21349989	ENSG00000231413.1,RP11-193P11.3.1,lncRNA,chr1:48317045-48320455	NA	ENSG00000221091.1,MIR1302-5,miRNA,chr20:48664579-48664729	NA	0	0	0	0	0	0	0	0	0	0	0	0	0	0
ENSG00000229974.1,AC083862.1,coding,chr7:134483336-134483456	ENSG00000211783.3,TRAV9-1,coding,chr14:21349513-21349989	ENSG00000234172.1,AC093639.1.1,lncRNA,chr2:184477500-184522084	NA	ENSG00000221091.1,MIR1302-5,miRNA,chr20:48664579-48664729	NA	0	0	0	0	0	0	0	0	0	0	0	0	0	0
ENSG00000204702.4,OR2J1,coding,chr6:29176364-29177637	NA	ENSG00000230206.1,AC000364.1.1,lncRNA,chr7:126507982-126518208	ENSG00000259730.1,CTD-2007H18.1.1,lncRNA,chr15:46023532-46028998	ENSG00000207755.1,MIR450A2,miRNA,chrX:133502203-133502303	NA	0	0	0	0	0	0	0	0	0	0	0	0	0	0
ENSG00000214285.1,NPS,coding,chr10:129237602-129240925	NA	ENSG00000250772.1,RP11-236P13.1.1,lncRNA,chr4:120939691-120945118	ENSG00000259730.1,CTD-2007H18.1.1,lncRNA,chr15:46023532-46028998	ENSG00000207983.1,MIR613,miRNA,chr12:12808849-12808944	NA	0	0	0	0	0	0	0	0	0	0	0	0	0	0
ENSG00000214285.1,NPS,coding,chr10:129237602-129240925	ENSG00000188069.3,OR51F1,coding,chr11:4746784-4747744	ENSG00000259730.1,CTD-2007H18.1.1,lncRNA,chr15:46023532-46028998	NA	ENSG00000207983.1,MIR613,miRNA,chr12:12808849-12808944	NA	0	0	0	0	0	0	0	0	1	0	0	0	0	1
ENSG00000214285.1,NPS,coding,chr10:129237602-129240925	NA	ENSG00000250488.1,RP11-6C14.1.1,lncRNA,chr4:160807104-160918386	ENSG00000259730.1,CTD-2007H18.1.1,lncRNA,chr15:46023532-46028998	ENSG00000207983.1,MIR613,miRNA,chr12:12808849-12808944	NA	0	0	0	0	0	0	0	0	0	0	0	0	0	0
ENSG00000259164.1,RP11-463C8.4.1,coding,chr14:76634406-76761558	NA	ENSG00000259981.1,AF096876.1.1,lncRNA,chr21:30383905-30392025	ENSG00000259730.1,CTD-2007H18.1.1,lncRNA,chr15:46023532-46028998	ENSG00000207755.1,MIR450A2,miRNA,chrX:133502203-133502303	NA	0	0	0	0	0	0	0	0	0	0	0	0	0	0
ENSG00000244624.2,KRTAP20-1,coding,chr21:30910620-30910874	NA	ENSG00000234686.1,AC010971.1.1,lncRNA,chr7:49240278-49264958	ENSG00000188280.6,AC007731.1.1,lncRNA,chr22:19022508-19046647	ENSG00000207729.1,MIR556,miRNA,chr1:160578959-160579054	NA	0	0	0	0	0	0	0	0	0	0	0	0	0	0
ENSG00000244624.2,KRTAP20-1,coding,chr21:30910620-30910874	NA	ENSG00000188280.6,AC007731.1.1,lncRNA,chr22:19022508-19046647	ENSG00000231597.1,AC007557.4.1,lncRNA,chr2:217427356-217428100	ENSG00000207729.1,MIR556,miRNA,chr1:160578959-160579054	NA	0	0	0	0	0	0	0	0	0	0	0	0	0	0
ENSG00000244624.2,KRTAP20-1,coding,chr21:30910620-30910874	NA	ENSG00000236828.1,DMD-AS3,lncRNA,chrX:32682977-32684438	ENSG00000188280.6,AC007731.1.1,lncRNA,chr22:19022508-19046647	ENSG00000207729.1,MIR556,miRNA,chr1:160578959-160579054	NA	0	0	0	0	0	0	0	0	0	0	0	0	0	0
ENSG00000244624.2,KRTAP20-1,coding,chr21:30910620-30910874	NA	ENSG00000249747.1,RP11-308K2.1.1,lncRNA,chr4:188360133-188367494	ENSG00000188280.6,AC007731.1.1,lncRNA,chr22:19022508-19046647	ENSG00000207729.1,MIR556,miRNA,chr1:160578959-160579054	NA	0	0	0	0	0	0	0	0	0	1	0	0	0	1
ENSG00000180708.4,OR10K2,coding,chr1:156656341-156657280	NA	ENSG00000231238.1,LINC00349,lncRNA,chr13:18012636-18022837	ENSG00000259981.1,AF096876.1.1,lncRNA,chr21:30383905-30392025	ENSG00000221410.1,MIR1238,miRNA,chr19:10523797-10523880	NA	0	0	0	0	0	0	0	0	0	0	0	0	0	0
ENSG00000180708.4,OR10K2,coding,chr1:156656341-156657280	NA	ENSG00000230051.1,CTA-929C8.8.1,lncRNA,chr22:26057747-26105226	ENSG00000231238.1,LINC00349,lncRNA,chr13:18012636-18022837	ENSG00000221410.1,MIR1238,miRNA,chr19:10523797-10523880	NA	0	0	0	0	0	0	0	0	0	0	0	0	0	0
ENSG00000180708.4,OR10K2,coding,chr1:156656341-156657280	NA	ENSG00000232806.1,AP001610.9.1,lncRNA,chr21:41852921-41856755	ENSG00000231238.1,LINC00349,lncRNA,chr13:18012636-18022837	ENSG00000221410.1,MIR1238,miRNA,chr19:10523797-10523880	NA	0	0	0	0	0	0	0	0	0	0	0	0	0	0
ENSG00000180708.4,OR10K2,coding,chr1:156656341-156657280	NA	ENSG00000234116.1,RP11-261C10.1.1,lncRNA,chr1:241235769-241237393	ENSG00000231238.1,LINC00349,lncRNA,chr13:18012636-18022837	ENSG00000221410.1,MIR1238,miRNA,chr19:10523797-10523880	NA	0	0	0	0	0	0	0	0	0	0	0	0	0	0
ENSG00000180708.4,OR10K2,coding,chr1:156656341-156657280	NA	ENSG00000233519.1,RP11-177F11.1.1,lncRNA,chr1:238630593-238631046	ENSG00000231238.1,LINC00349,lncRNA,chr13:18012636-18022837	ENSG00000221410.1,MIR1238,miRNA,chr19:10523797-10523880	NA	0	0	0	0	0	0	0	0	0	0	0	0	0	0
ENSG00000176742.1,OR51V1,coding,chr11:5177540-5178506	ENSG00000180708.4,OR10K2,coding,chr1:156656341-156657280	ENSG00000231597.1,AC007557.4.1,lncRNA,chr2:217427356-217428100	NA	ENSG00000221410.1,MIR1238,miRNA,chr19:10523797-10523880	NA	0	0	0	0	0	0	0	0	0	0	0	0	0	0
ENSG00000176742.1,OR51V1,coding,chr11:5177540-5178506	ENSG00000180708.4,OR10K2,coding,chr1:156656341-156657280	ENSG00000234116.1,RP11-261C10.1.1,lncRNA,chr1:241235769-241237393	NA	ENSG00000221410.1,MIR1238,miRNA,chr19:10523797-10523880	NA	0	0	0	0	0	0	0	0	0	0	0	0	0	0
ENSG00000176742.1,OR51V1,coding,chr11:5177540-5178506	ENSG00000180708.4,OR10K2,coding,chr1:156656341-156657280	ENSG00000233519.1,RP11-177F11.1.1,lncRNA,chr1:238630593-238631046	NA	ENSG00000221410.1,MIR1238,miRNA,chr19:10523797-10523880	NA	0	0	0	0	0	0	0	0	0	0	0	0	0	0
ENSG00000180708.4,OR10K2,coding,chr1:156656341-156657280	NA	ENSG00000233519.1,RP11-177F11.1.1,lncRNA,chr1:238630593-238631046	ENSG00000231597.1,AC007557.4.1,lncRNA,chr2:217427356-217428100	ENSG00000221410.1,MIR1238,miRNA,chr19:10523797-10523880	NA	0	0	0	0	0	0	0	0	0	0	0	0	0	0
ENSG00000180708.4,OR10K2,coding,chr1:156656341-156657280	NA	ENSG00000232806.1,AP001610.9.1,lncRNA,chr21:41852921-41856755	ENSG00000233519.1,RP11-177F11.1.1,lncRNA,chr1:238630593-238631046	ENSG00000221410.1,MIR1238,miRNA,chr19:10523797-10523880	NA	0	0	0	0	0	0	0	0	0	0	0	0	0	0
ENSG00000214306.3,AP001024.2,coding,chr11:107148338-107152554	NA	ENSG00000251256.1,RP11-273B19.1.1,lncRNA,chr4:55406490-55420164	ENSG00000256699.1,RP11-669N7.3.1,lncRNA,chr12:128259098-128263160	ENSG00000207929.1,MIR195,miRNA,chr17:6861657-6861744	NA	0	0	0	0	0	0	0	0	0	0	0	0	0	0
ENSG00000214306.3,AP001024.2,coding,chr11:107148338-107152554	NA	ENSG00000251256.1,RP11-273B19.1.1,lncRNA,chr4:55406490-55420164	NA	ENSG00000207929.1,MIR195,miRNA,chr17:6861657-6861744	ENSG00000212044.1,MIR548U,miRNA,chr1:147589954-147590046	0	0	0	0	0	0	0	0	0	0	0	0	0	0
ENSG00000214306.3,AP001024.2,coding,chr11:107148338-107152554	NA	ENSG00000259989.1,CTD-2555A7.1.1,lncRNA,chr16:87577940-87589278	NA	ENSG00000207929.1,MIR195,miRNA,chr17:6861657-6861744	ENSG00000212044.1,MIR548U,miRNA,chr1:147589954-147590046	0	0	0	0	0	0	0	0	0	0	0	0	0	0
ENSG00000214306.3,AP001024.2,coding,chr11:107148338-107152554	NA	ENSG00000256699.1,RP11-669N7.3.1,lncRNA,chr12:128259098-128263160	ENSG00000249169.1,CTC-529L17.1.1,lncRNA,chr5:92016310-92040604	ENSG00000207929.1,MIR195,miRNA,chr17:6861657-6861744	NA	0	0	0	0	0	0	0	0	0	0	0	0	0	0
ENSG00000214306.3,AP001024.2,coding,chr11:107148338-107152554	NA	ENSG00000249169.1,CTC-529L17.1.1,lncRNA,chr5:92016310-92040604	NA	ENSG00000207929.1,MIR195,miRNA,chr17:6861657-6861744	ENSG00000212044.1,MIR548U,miRNA,chr1:147589954-147590046	0	0	0	0	0	0	0	0	0	0	0	0	0	0
ENSG00000155249.4,OR4K1,coding,chr14:19473606-19474682	NA	ENSG00000234519.1,RP3-495K2.1.1,lncRNA,chr6:169209837-169211444	ENSG00000261176.1,RP11-2L4.1.1,lncRNA,chr16:81145154-81166316	ENSG00000207929.1,MIR195,miRNA,chr17:6861657-6861744	NA	0	0	0	0	0	0	0	0	0	0	0	0	0	0
ENSG00000155249.4,OR4K1,coding,chr14:19473606-19474682	NA	ENSG00000223720.1,RP5-1024N4.2.1,lncRNA,chr1:48444223-48445102	ENSG00000234519.1,RP3-495K2.1.1,lncRNA,chr6:169209837-169211444	ENSG00000207929.1,MIR195,miRNA,chr17:6861657-6861744	NA	0	0	0	0	0	0	0	0	0	0	0	0	0	0
ENSG00000155249.4,OR4K1,coding,chr14:19473606-19474682	NA	ENSG00000223720.1,RP5-1024N4.2.1,lncRNA,chr1:48444223-48445102	ENSG00000261176.1,RP11-2L4.1.1,lncRNA,chr16:81145154-81166316	ENSG00000207929.1,MIR195,miRNA,chr17:6861657-6861744	NA	0	0	0	0	0	0	0	0	0	0	0	0	0	0
ENSG00000177151.3,OR2T35,coding,chr1:246868210-246869182	ENSG00000184724.4,KRTAP6-1,coding,chr21:30907620-30911767	ENSG00000251619.1,RP11-756P10.5.1,lncRNA,chr4:189934804-189943659	NA	ENSG00000221464.1,MIR1271,miRNA,chr5:175727554-175727640	NA	0	0	0	0	0	0	0	0	1	0	0	0	0	1
ENSG00000184724.4,KRTAP6-1,coding,chr21:30907620-30911767	ENSG00000214891.4,TRIM64C,coding,chr11:49031841-49037240	ENSG00000251619.1,RP11-756P10.5.1,lncRNA,chr4:189934804-189943659	NA	ENSG00000221464.1,MIR1271,miRNA,chr5:175727554-175727640	NA	0	0	0	0	0	0	0	1	1	0	0	0	0	2
ENSG00000186967.6,KRTAP19-4,coding,chr21:30791012-30791322	NA	ENSG00000224879.1,AC011754.1.1,lncRNA,chr2:79239007-79266157	ENSG00000225960.1,RP11-360A18.1.1,lncRNA,chr9:121775192-121776421	ENSG00000221525.1,MIR1185-1,miRNA,chr14:100579066-100579152	NA	0	0	0	0	0	0	0	0	0	0	0	0	0	0
ENSG00000259164.1,RP11-463C8.4.1,coding,chr14:76634406-76761558	NA	ENSG00000224879.1,AC011754.1.1,lncRNA,chr2:79239007-79266157	ENSG00000225960.1,RP11-360A18.1.1,lncRNA,chr9:121775192-121776421	ENSG00000221525.1,MIR1185-1,miRNA,chr14:100579066-100579152	NA	0	0	0	0	0	0	0	0	0	0	0	0	0	0
ENSG00000177151.3,OR2T35,coding,chr1:246868210-246869182	NA	ENSG00000225960.1,RP11-360A18.1.1,lncRNA,chr9:121775192-121776421	NA	ENSG00000221464.1,MIR1271,miRNA,chr5:175727554-175727640	ENSG00000207989.1,MIR493,miRNA,chr14:100405149-100405238	0	0	0	0	0	0	0	0	0	0	0	0	0	0
ENSG00000186967.6,KRTAP19-4,coding,chr21:30791012-30791322	NA	ENSG00000231492.2,AP003774.5.1,lncRNA,chr11:63944438-63956718	ENSG00000225960.1,RP11-360A18.1.1,lncRNA,chr9:121775192-121776421	ENSG00000221525.1,MIR1185-1,miRNA,chr14:100579066-100579152	NA	0	0	0	0	0	0	0	0	0	0	0	0	0	0
ENSG00000186967.6,KRTAP19-4,coding,chr21:30791012-30791322	NA	ENSG00000234767.1,RP11-223F20.2.1,lncRNA,chr13:65338306-65350352	ENSG00000225960.1,RP11-360A18.1.1,lncRNA,chr9:121775192-121776421	ENSG00000221525.1,MIR1185-1,miRNA,chr14:100579066-100579152	NA	0	0	0	0	0	0	0	0	0	0	0	0	0	0
ENSG00000259164.1,RP11-463C8.4.1,coding,chr14:76634406-76761558	NA	ENSG00000257470.1,RP11-397H6.1.1,lncRNA,chr12:95941929-95969038	ENSG00000225960.1,RP11-360A18.1.1,lncRNA,chr9:121775192-121776421	ENSG00000221525.1,MIR1185-1,miRNA,chr14:100579066-100579152	NA	0	0	0	0	0	0	0	0	0	0	0	0	0	0
ENSG00000259164.1,RP11-463C8.4.1,coding,chr14:76634406-76761558	NA	ENSG00000234767.1,RP11-223F20.2.1,lncRNA,chr13:65338306-65350352	ENSG00000225960.1,RP11-360A18.1.1,lncRNA,chr9:121775192-121776421	ENSG00000221525.1,MIR1185-1,miRNA,chr14:100579066-100579152	NA	0	0	0	0	0	0	0	0	0	0	0	0	0	0
ENSG00000259164.1,RP11-463C8.4.1,coding,chr14:76634406-76761558	NA	ENSG00000258747.1,RP11-163M18.1.1,lncRNA,chr14:44046359-44077466	ENSG00000225960.1,RP11-360A18.1.1,lncRNA,chr9:121775192-121776421	ENSG00000221525.1,MIR1185-1,miRNA,chr14:100579066-100579152	NA	0	0	0	0	0	0	0	0	0	0	0	0	0	0
ENSG00000204703.3,OR2B3,coding,chr6:29161963-29163069	NA	ENSG00000254861.1,RP11-945A11.2.1,lncRNA,chr11:23739451-23782720	NA	ENSG00000207729.1,MIR556,miRNA,chr1:160578959-160579054	ENSG00000207546.1,MIR548C,miRNA,chr12:63302555-63302652	0	0	0	0	0	0	0	0	0	1	0	0	0	1
ENSG00000204703.3,OR2B3,coding,chr6:29161963-29163069	NA	ENSG00000231140.1,RP11-347J14.7.1,lncRNA,chr9:39385733-39387403	NA	ENSG00000207729.1,MIR556,miRNA,chr1:160578959-160579054	ENSG00000207546.1,MIR548C,miRNA,chr12:63302555-63302652	0	0	0	0	0	0	0	0	0	0	0	0	0	0
ENSG00000259164.1,RP11-463C8.4.1,coding,chr14:76634406-76761558	NA	ENSG00000257470.1,RP11-397H6.1.1,lncRNA,chr12:95941929-95969038	ENSG00000253551.1,RP11-26M5.2.1,lncRNA,chr8:53269474-53274693	ENSG00000207546.1,MIR548C,miRNA,chr12:63302555-63302652	NA	0	0	0	0	0	0	0	0	0	0	0	0	0	0
ENSG00000259164.1,RP11-463C8.4.1,coding,chr14:76634406-76761558	NA	ENSG00000258747.1,RP11-163M18.1.1,lncRNA,chr14:44046359-44077466	ENSG00000253551.1,RP11-26M5.2.1,lncRNA,chr8:53269474-53274693	ENSG00000207546.1,MIR548C,miRNA,chr12:63302555-63302652	NA	0	0	0	0	0	0	0	0	0	0	0	0	0	0
ENSG00000204703.3,OR2B3,coding,chr6:29161963-29163069	NA	ENSG00000257470.1,RP11-397H6.1.1,lncRNA,chr12:95941929-95969038	ENSG00000254861.1,RP11-945A11.2.1,lncRNA,chr11:23739451-23782720	ENSG00000207546.1,MIR548C,miRNA,chr12:63302555-63302652	NA	0	0	0	0	0	0	0	0	0	0	1	0	0	1
ENSG00000204703.3,OR2B3,coding,chr6:29161963-29163069	NA	ENSG00000258747.1,RP11-163M18.1.1,lncRNA,chr14:44046359-44077466	ENSG00000254861.1,RP11-945A11.2.1,lncRNA,chr11:23739451-23782720	ENSG00000207546.1,MIR548C,miRNA,chr12:63302555-63302652	NA	0	0	0	0	0	0	0	0	0	0	1	0	0	1
ENSG00000259164.1,RP11-463C8.4.1,coding,chr14:76634406-76761558	ENSG00000204703.3,OR2B3,coding,chr6:29161963-29163069	ENSG00000254861.1,RP11-945A11.2.1,lncRNA,chr11:23739451-23782720	NA	ENSG00000207546.1,MIR548C,miRNA,chr12:63302555-63302652	NA	0	0	0	0	0	0	0	0	0	1	0	0	0	1
ENSG00000259164.1,RP11-463C8.4.1,coding,chr14:76634406-76761558	NA	ENSG00000257470.1,RP11-397H6.1.1,lncRNA,chr12:95941929-95969038	ENSG00000254861.1,RP11-945A11.2.1,lncRNA,chr11:23739451-23782720	ENSG00000207546.1,MIR548C,miRNA,chr12:63302555-63302652	NA	0	0	0	0	0	0	0	0	0	0	1	0	0	1
ENSG00000259164.1,RP11-463C8.4.1,coding,chr14:76634406-76761558	NA	ENSG00000258747.1,RP11-163M18.1.1,lncRNA,chr14:44046359-44077466	ENSG00000254861.1,RP11-945A11.2.1,lncRNA,chr11:23739451-23782720	ENSG00000207546.1,MIR548C,miRNA,chr12:63302555-63302652	NA	0	0	0	0	0	0	0	0	0	0	1	0	0	1
ENSG00000204703.3,OR2B3,coding,chr6:29161963-29163069	NA	ENSG00000258747.1,RP11-163M18.1.1,lncRNA,chr14:44046359-44077466	ENSG00000257470.1,RP11-397H6.1.1,lncRNA,chr12:95941929-95969038	ENSG00000207546.1,MIR548C,miRNA,chr12:63302555-63302652	NA	0	0	0	0	0	0	0	0	0	0	0	0	0	0
ENSG00000259164.1,RP11-463C8.4.1,coding,chr14:76634406-76761558	ENSG00000204703.3,OR2B3,coding,chr6:29161963-29163069	ENSG00000257470.1,RP11-397H6.1.1,lncRNA,chr12:95941929-95969038	NA	ENSG00000207546.1,MIR548C,miRNA,chr12:63302555-63302652	NA	0	0	0	0	0	0	0	0	0	0	0	0	0	0
ENSG00000259164.1,RP11-463C8.4.1,coding,chr14:76634406-76761558	ENSG00000204703.3,OR2B3,coding,chr6:29161963-29163069	ENSG00000258747.1,RP11-163M18.1.1,lncRNA,chr14:44046359-44077466	NA	ENSG00000207546.1,MIR548C,miRNA,chr12:63302555-63302652	NA	0	0	0	0	0	0	0	0	0	0	0	0	0	0
ENSG00000259164.1,RP11-463C8.4.1,coding,chr14:76634406-76761558	NA	ENSG00000258747.1,RP11-163M18.1.1,lncRNA,chr14:44046359-44077466	ENSG00000230051.1,CTA-929C8.8.1,lncRNA,chr22:26057747-26105226	ENSG00000207546.1,MIR548C,miRNA,chr12:63302555-63302652	NA	0	0	0	0	0	0	0	0	0	0	0	0	0	0
ENSG00000259164.1,RP11-463C8.4.1,coding,chr14:76634406-76761558	NA	ENSG00000258747.1,RP11-163M18.1.1,lncRNA,chr14:44046359-44077466	ENSG00000257470.1,RP11-397H6.1.1,lncRNA,chr12:95941929-95969038	ENSG00000207546.1,MIR548C,miRNA,chr12:63302555-63302652	NA	0	0	0	0	0	0	0	0	0	0	0	0	0	0
ENSG00000186924.2,KRTAP22-1,coding,chr21:30895284-30895483	NA	ENSG00000227823.1,RP11-271F18.2.1,lncRNA,chr10:10517917-10544254	ENSG00000249111.1,RP11-622J8.1.1,lncRNA,chr4:59701146-59724459	ENSG00000207780.1,MIR648,miRNA,chr22:16843633-16843727	NA	0	0	0	0	0	0	0	0	0	0	0	0	0	0
ENSG00000186924.2,KRTAP22-1,coding,chr21:30895284-30895483	ENSG00000256892.1,MTRNR2L7,coding,chr10:37930371-37931865	ENSG00000227823.1,RP11-271F18.2.1,lncRNA,chr10:10517917-10544254	NA	ENSG00000207780.1,MIR648,miRNA,chr22:16843633-16843727	NA	0	0	0	0	0	0	0	0	0	0	0	0	0	0
ENSG00000186924.2,KRTAP22-1,coding,chr21:30895284-30895483	NA	ENSG00000227823.1,RP11-271F18.2.1,lncRNA,chr10:10517917-10544254	ENSG00000254380.1,RP11-317J10.4.1,lncRNA,chr8:86623379-86639992	ENSG00000207780.1,MIR648,miRNA,chr22:16843633-16843727	NA	0	0	0	0	0	0	0	0	0	0	0	0	0	0
ENSG00000186924.2,KRTAP22-1,coding,chr21:30895284-30895483	NA	ENSG00000227823.1,RP11-271F18.2.1,lncRNA,chr10:10517917-10544254	ENSG00000250242.1,RP11-438C19.1.1,lncRNA,chr5:114451487-114452071	ENSG00000207780.1,MIR648,miRNA,chr22:16843633-16843727	NA	0	0	0	0	0	0	0	0	0	0	0	0	0	0
ENSG00000186924.2,KRTAP22-1,coding,chr21:30895284-30895483	NA	ENSG00000227823.1,RP11-271F18.2.1,lncRNA,chr10:10517917-10544254	ENSG00000255171.1,RP11-375D13.2.1,lncRNA,chr11:41692693-41814568	ENSG00000207780.1,MIR648,miRNA,chr22:16843633-16843727	NA	0	0	0	0	0	0	0	0	0	0	0	0	0	0
ENSG00000186924.2,KRTAP22-1,coding,chr21:30895284-30895483	NA	ENSG00000227823.1,RP11-271F18.2.1,lncRNA,chr10:10517917-10544254	ENSG00000229005.1,RP5-881L22.4.1,lncRNA,chr20:42439796-42457760	ENSG00000207780.1,MIR648,miRNA,chr22:16843633-16843727	NA	0	0	0	0	0	0	0	0	0	0	0	0	0	0
ENSG00000186924.2,KRTAP22-1,coding,chr21:30895284-30895483	NA	ENSG00000249111.1,RP11-622J8.1.1,lncRNA,chr4:59701146-59724459	ENSG00000224231.1,AC069394.1.1,lncRNA,chr2:138575923-138579945	ENSG00000207780.1,MIR648,miRNA,chr22:16843633-16843727	NA	0	0	0	0	0	0	0	0	0	0	0	0	0	0
ENSG00000186924.2,KRTAP22-1,coding,chr21:30895284-30895483	NA	ENSG00000250242.1,RP11-438C19.1.1,lncRNA,chr5:114451487-114452071	ENSG00000249111.1,RP11-622J8.1.1,lncRNA,chr4:59701146-59724459	ENSG00000207780.1,MIR648,miRNA,chr22:16843633-16843727	NA	0	0	0	0	0	0	0	0	0	0	0	0	0	0
ENSG00000176567.1,OR4X1,coding,chr11:48241988-48242906	ENSG00000186924.2,KRTAP22-1,coding,chr21:30895284-30895483	ENSG00000250242.1,RP11-438C19.1.1,lncRNA,chr5:114451487-114452071	NA	ENSG00000207780.1,MIR648,miRNA,chr22:16843633-16843727	NA	0	0	0	0	0	0	0	0	0	0	0	0	0	0
ENSG00000186924.2,KRTAP22-1,coding,chr21:30895284-30895483	ENSG00000256892.1,MTRNR2L7,coding,chr10:37930371-37931865	ENSG00000229005.1,RP5-881L22.4.1,lncRNA,chr20:42439796-42457760	NA	ENSG00000207780.1,MIR648,miRNA,chr22:16843633-16843727	NA	0	0	0	0	0	0	0	0	0	0	0	0	0	0
ENSG00000186924.2,KRTAP22-1,coding,chr21:30895284-30895483	NA	ENSG00000250242.1,RP11-438C19.1.1,lncRNA,chr5:114451487-114452071	ENSG00000254380.1,RP11-317J10.4.1,lncRNA,chr8:86623379-86639992	ENSG00000207780.1,MIR648,miRNA,chr22:16843633-16843727	NA	0	0	0	0	0	0	0	0	0	0	0	0	0	0
ENSG00000186924.2,KRTAP22-1,coding,chr21:30895284-30895483	NA	ENSG00000255171.1,RP11-375D13.2.1,lncRNA,chr11:41692693-41814568	ENSG00000224231.1,AC069394.1.1,lncRNA,chr2:138575923-138579945	ENSG00000207780.1,MIR648,miRNA,chr22:16843633-16843727	NA	0	0	0	0	0	0	0	0	0	0	0	0	0	0
ENSG00000186119.6,OR5D18,coding,chr11:55343661-55344649	NA	ENSG00000227489.1,AC006458.3.1,lncRNA,chr7:15072356-15074801	ENSG00000234795.3,AC007275.2.1,lncRNA,chrY:7670635-7750901	ENSG00000221333.1,MIR548K,miRNA,chr11:69807708-69807824	NA	0	0	0	0	0	0	0	0	0	1	0	1	0	2
ENSG00000181752.3,OR8K5,coding,chr11:55683445-55684369	NA	ENSG00000227489.1,AC006458.3.1,lncRNA,chr7:15072356-15074801	ENSG00000234795.3,AC007275.2.1,lncRNA,chrY:7670635-7750901	ENSG00000221333.1,MIR548K,miRNA,chr11:69807708-69807824	NA	0	0	0	0	0	0	0	0	0	1	0	1	0	2
ENSG00000244624.2,KRTAP20-1,coding,chr21:30910620-30910874	NA	ENSG00000227489.1,AC006458.3.1,lncRNA,chr7:15072356-15074801	ENSG00000234795.3,AC007275.2.1,lncRNA,chrY:7670635-7750901	ENSG00000221333.1,MIR548K,miRNA,chr11:69807708-69807824	NA	0	0	0	0	0	0	0	0	0	1	0	1	0	2
ENSG00000186119.6,OR5D18,coding,chr11:55343661-55344649	NA	ENSG00000227489.1,AC006458.3.1,lncRNA,chr7:15072356-15074801	ENSG00000258881.1,AC007040.11.1,lncRNA,chr2:71028177-71075387	ENSG00000221333.1,MIR548K,miRNA,chr11:69807708-69807824	NA	0	0	0	0	0	0	0	0	0	1	1	1	0	3
ENSG00000186119.6,OR5D18,coding,chr11:55343661-55344649	NA	ENSG00000227489.1,AC006458.3.1,lncRNA,chr7:15072356-15074801	ENSG00000254380.1,RP11-317J10.4.1,lncRNA,chr8:86623379-86639992	ENSG00000221333.1,MIR548K,miRNA,chr11:69807708-69807824	NA	0	0	0	0	0	0	0	0	0	1	0	1	0	2
ENSG00000186119.6,OR5D18,coding,chr11:55343661-55344649	NA	ENSG00000227489.1,AC006458.3.1,lncRNA,chr7:15072356-15074801	ENSG00000234104.1,RP5-1177M21.1.1,lncRNA,chr20:20899088-20901203	ENSG00000221333.1,MIR548K,miRNA,chr11:69807708-69807824	NA	0	0	0	0	0	0	0	0	0	1	1	1	0	3
ENSG00000186119.6,OR5D18,coding,chr11:55343661-55344649	ENSG00000181752.3,OR8K5,coding,chr11:55683445-55684369	ENSG00000227489.1,AC006458.3.1,lncRNA,chr7:15072356-15074801	NA	ENSG00000221333.1,MIR548K,miRNA,chr11:69807708-69807824	NA	0	0	0	0	0	0	0	0	0	1	0	1	0	2
ENSG00000186119.6,OR5D18,coding,chr11:55343661-55344649	NA	ENSG00000227489.1,AC006458.3.1,lncRNA,chr7:15072356-15074801	ENSG00000243497.1,RP13-503K1.4.1,lncRNA,chr3:95277875-95283355	ENSG00000221333.1,MIR548K,miRNA,chr11:69807708-69807824	NA	0	0	0	0	0	0	0	0	0	1	1	1	0	3
ENSG00000186119.6,OR5D18,coding,chr11:55343661-55344649	NA	ENSG00000227489.1,AC006458.3.1,lncRNA,chr7:15072356-15074801	ENSG00000236653.1,AC005235.1.1,lncRNA,chr2:198872331-198948066	ENSG00000221333.1,MIR548K,miRNA,chr11:69807708-69807824	NA	0	0	0	0	0	0	0	0	0	1	0	1	0	2
ENSG00000186119.6,OR5D18,coding,chr11:55343661-55344649	NA	ENSG00000227489.1,AC006458.3.1,lncRNA,chr7:15072356-15074801	ENSG00000230768.1,RP11-251P6.1.1,lncRNA,chr1:105933838-105963080	ENSG00000221333.1,MIR548K,miRNA,chr11:69807708-69807824	NA	0	0	0	0	0	0	0	0	0	1	0	1	0	2
ENSG00000186119.6,OR5D18,coding,chr11:55343661-55344649	ENSG00000204823.3,AC008676.1,coding,chr5:156735326-156744525	ENSG00000227489.1,AC006458.3.1,lncRNA,chr7:15072356-15074801	NA	ENSG00000221333.1,MIR548K,miRNA,chr11:69807708-69807824	NA	0	0	0	0	0	0	0	0	0	1	0	1	0	2
ENSG00000186119.6,OR5D18,coding,chr11:55343661-55344649	ENSG00000253207.2,RP11-67H2.1.1,coding,chr8:114681714-114698363	ENSG00000227489.1,AC006458.3.1,lncRNA,chr7:15072356-15074801	NA	ENSG00000221333.1,MIR548K,miRNA,chr11:69807708-69807824	NA	0	0	0	0	0	0	0	0	0	1	0	1	0	2
ENSG00000204823.3,AC008676.1,coding,chr5:156735326-156744525	NA	ENSG00000227489.1,AC006458.3.1,lncRNA,chr7:15072356-15074801	ENSG00000258881.1,AC007040.11.1,lncRNA,chr2:71028177-71075387	ENSG00000221333.1,MIR548K,miRNA,chr11:69807708-69807824	NA	0	0	0	0	0	0	0	0	0	1	1	1	0	3
ENSG00000181752.3,OR8K5,coding,chr11:55683445-55684369	NA	ENSG00000227489.1,AC006458.3.1,lncRNA,chr7:15072356-15074801	ENSG00000234104.1,RP5-1177M21.1.1,lncRNA,chr20:20899088-20901203	ENSG00000221333.1,MIR548K,miRNA,chr11:69807708-69807824	NA	0	0	0	0	0	0	0	0	0	1	1	1	0	3
ENSG00000244624.2,KRTAP20-1,coding,chr21:30910620-30910874	NA	ENSG00000227489.1,AC006458.3.1,lncRNA,chr7:15072356-15074801	ENSG00000234686.1,AC010971.1.1,lncRNA,chr7:49240278-49264958	ENSG00000221333.1,MIR548K,miRNA,chr11:69807708-69807824	NA	0	0	0	0	0	0	0	0	0	1	0	1	0	2
ENSG00000181752.3,OR8K5,coding,chr11:55683445-55684369	NA	ENSG00000227489.1,AC006458.3.1,lncRNA,chr7:15072356-15074801	ENSG00000230768.1,RP11-251P6.1.1,lncRNA,chr1:105933838-105963080	ENSG00000221333.1,MIR548K,miRNA,chr11:69807708-69807824	NA	0	0	0	0	0	0	0	0	0	1	0	1	0	2
ENSG00000244624.2,KRTAP20-1,coding,chr21:30910620-30910874	NA	ENSG00000227489.1,AC006458.3.1,lncRNA,chr7:15072356-15074801	ENSG00000236828.1,DMD-AS3,lncRNA,chrX:32682977-32684438	ENSG00000221333.1,MIR548K,miRNA,chr11:69807708-69807824	NA	0	0	0	0	0	0	0	0	0	1	0	1	0	2
ENSG00000186119.6,OR5D18,coding,chr11:55343661-55344649	ENSG00000181752.3,OR8K5,coding,chr11:55683445-55684369	ENSG00000234795.3,AC007275.2.1,lncRNA,chrY:7670635-7750901	NA	ENSG00000221333.1,MIR548K,miRNA,chr11:69807708-69807824	NA	0	0	0	0	0	0	0	0	0	0	0	1	0	1
ENSG00000186119.6,OR5D18,coding,chr11:55343661-55344649	NA	ENSG00000234795.3,AC007275.2.1,lncRNA,chrY:7670635-7750901	ENSG00000236653.1,AC005235.1.1,lncRNA,chr2:198872331-198948066	ENSG00000221333.1,MIR548K,miRNA,chr11:69807708-69807824	NA	0	0	0	0	0	0	0	0	0	0	0	1	0	1
ENSG00000244624.2,KRTAP20-1,coding,chr21:30910620-30910874	NA	ENSG00000234795.3,AC007275.2.1,lncRNA,chrY:7670635-7750901	ENSG00000234686.1,AC010971.1.1,lncRNA,chr7:49240278-49264958	ENSG00000221333.1,MIR548K,miRNA,chr11:69807708-69807824	NA	0	0	0	0	0	0	0	0	0	0	0	1	0	1
ENSG00000244624.2,KRTAP20-1,coding,chr21:30910620-30910874	NA	ENSG00000236828.1,DMD-AS3,lncRNA,chrX:32682977-32684438	ENSG00000234795.3,AC007275.2.1,lncRNA,chrY:7670635-7750901	ENSG00000221333.1,MIR548K,miRNA,chr11:69807708-69807824	NA	0	0	0	0	0	0	0	0	0	0	0	1	0	1
ENSG00000186119.6,OR5D18,coding,chr11:55343661-55344649	ENSG00000204823.3,AC008676.1,coding,chr5:156735326-156744525	ENSG00000258881.1,AC007040.11.1,lncRNA,chr2:71028177-71075387	NA	ENSG00000221333.1,MIR548K,miRNA,chr11:69807708-69807824	NA	0	0	0	0	0	0	0	0	0	1	0	1	0	2
ENSG00000186119.6,OR5D18,coding,chr11:55343661-55344649	ENSG00000181752.3,OR8K5,coding,chr11:55683445-55684369	ENSG00000234104.1,RP5-1177M21.1.1,lncRNA,chr20:20899088-20901203	NA	ENSG00000221333.1,MIR548K,miRNA,chr11:69807708-69807824	NA	0	0	0	0	0	0	0	0	0	1	0	1	0	2
ENSG00000186119.6,OR5D18,coding,chr11:55343661-55344649	ENSG00000181752.3,OR8K5,coding,chr11:55683445-55684369	ENSG00000230768.1,RP11-251P6.1.1,lncRNA,chr1:105933838-105963080	NA	ENSG00000221333.1,MIR548K,miRNA,chr11:69807708-69807824	NA	0	0	0	0	0	0	0	0	0	0	0	1	0	1
ENSG00000244624.2,KRTAP20-1,coding,chr21:30910620-30910874	NA	ENSG00000234686.1,AC010971.1.1,lncRNA,chr7:49240278-49264958	ENSG00000231597.1,AC007557.4.1,lncRNA,chr2:217427356-217428100	ENSG00000221333.1,MIR548K,miRNA,chr11:69807708-69807824	NA	0	0	0	0	0	0	0	0	0	0	0	1	0	1
ENSG00000244624.2,KRTAP20-1,coding,chr21:30910620-30910874	NA	ENSG00000236828.1,DMD-AS3,lncRNA,chrX:32682977-32684438	ENSG00000234686.1,AC010971.1.1,lncRNA,chr7:49240278-49264958	ENSG00000221333.1,MIR548K,miRNA,chr11:69807708-69807824	NA	0	0	0	0	0	0	0	0	0	0	0	1	0	1
ENSG00000259164.1,RP11-463C8.4.1,coding,chr14:76634406-76761558	NA	ENSG00000257470.1,RP11-397H6.1.1,lncRNA,chr12:95941929-95969038	ENSG00000257510.1,RP11-609L23.1.1,lncRNA,chr12:41295571-41326567	ENSG00000207988.1,MIR576,miRNA,chr4:110629302-110629400	NA	0	0	0	0	0	0	0	0	0	0	0	0	0	0
ENSG00000259164.1,RP11-463C8.4.1,coding,chr14:76634406-76761558	NA	ENSG00000258747.1,RP11-163M18.1.1,lncRNA,chr14:44046359-44077466	ENSG00000257510.1,RP11-609L23.1.1,lncRNA,chr12:41295571-41326567	ENSG00000207988.1,MIR576,miRNA,chr4:110629302-110629400	NA	0	0	0	0	0	0	0	0	0	0	0	0	0	0
ENSG00000166930.2,MS4A5,coding,chr11:59953637-59979263	NA	ENSG00000254000.1,RP11-245A18.1.1,lncRNA,chr8:125006179-125007354	ENSG00000258532.1,RP11-353P15.1.1,lncRNA,chr14:83442968-83451147	ENSG00000207612.1,MIR604,miRNA,chr10:29873938-29874032	NA	0	0	0	0	0	0	0	0	0	0	0	0	0	0
ENSG00000166930.2,MS4A5,coding,chr11:59953637-59979263	NA	ENSG00000223410.1,RP1-191L6.2.1,lncRNA,chr20:38183095-38188412	ENSG00000258532.1,RP11-353P15.1.1,lncRNA,chr14:83442968-83451147	ENSG00000207612.1,MIR604,miRNA,chr10:29873938-29874032	NA	0	0	0	0	0	0	0	0	0	0	0	0	0	0
ENSG00000259164.1,RP11-463C8.4.1,coding,chr14:76634406-76761558	NA	ENSG00000254000.1,RP11-245A18.1.1,lncRNA,chr8:125006179-125007354	ENSG00000258532.1,RP11-353P15.1.1,lncRNA,chr14:83442968-83451147	ENSG00000207612.1,MIR604,miRNA,chr10:29873938-29874032	NA	0	0	0	0	0	0	0	0	0	0	0	0	0	0
ENSG00000259164.1,RP11-463C8.4.1,coding,chr14:76634406-76761558	NA	ENSG00000258747.1,RP11-163M18.1.1,lncRNA,chr14:44046359-44077466	ENSG00000258532.1,RP11-353P15.1.1,lncRNA,chr14:83442968-83451147	ENSG00000207612.1,MIR604,miRNA,chr10:29873938-29874032	NA	0	0	0	0	0	0	0	0	0	0	0	0	0	0
ENSG00000177151.3,OR2T35,coding,chr1:246868210-246869182	ENSG00000184724.4,KRTAP6-1,coding,chr21:30907620-30911767	ENSG00000258532.1,RP11-353P15.1.1,lncRNA,chr14:83442968-83451147	NA	ENSG00000221464.1,MIR1271,miRNA,chr5:175727554-175727640	NA	0	0	0	0	0	0	0	0	1	0	0	0	0	1
ENSG00000177151.3,OR2T35,coding,chr1:246868210-246869182	NA	ENSG00000223410.1,RP1-191L6.2.1,lncRNA,chr20:38183095-38188412	ENSG00000258532.1,RP11-353P15.1.1,lncRNA,chr14:83442968-83451147	ENSG00000221464.1,MIR1271,miRNA,chr5:175727554-175727640	NA	0	0	0	0	0	0	0	0	0	0	0	0	0	0
ENSG00000177151.3,OR2T35,coding,chr1:246868210-246869182	NA	ENSG00000258532.1,RP11-353P15.1.1,lncRNA,chr14:83442968-83451147	NA	ENSG00000221464.1,MIR1271,miRNA,chr5:175727554-175727640	ENSG00000207989.1,MIR493,miRNA,chr14:100405149-100405238	0	0	0	0	0	0	0	0	0	0	0	0	0	0
ENSG00000184724.4,KRTAP6-1,coding,chr21:30907620-30911767	NA	ENSG00000223410.1,RP1-191L6.2.1,lncRNA,chr20:38183095-38188412	ENSG00000258532.1,RP11-353P15.1.1,lncRNA,chr14:83442968-83451147	ENSG00000221464.1,MIR1271,miRNA,chr5:175727554-175727640	NA	0	0	0	0	0	0	0	1	0	0	0	0	0	1
ENSG00000184724.4,KRTAP6-1,coding,chr21:30907620-30911767	NA	ENSG00000258532.1,RP11-353P15.1.1,lncRNA,chr14:83442968-83451147	NA	ENSG00000221464.1,MIR1271,miRNA,chr5:175727554-175727640	ENSG00000207989.1,MIR493,miRNA,chr14:100405149-100405238	0	0	0	0	0	0	0	1	0	0	0	0	0	1
ENSG00000177151.3,OR2T35,coding,chr1:246868210-246869182	ENSG00000184724.4,KRTAP6-1,coding,chr21:30907620-30911767	ENSG00000258532.1,RP11-353P15.1.1,lncRNA,chr14:83442968-83451147	NA	ENSG00000207989.1,MIR493,miRNA,chr14:100405149-100405238	NA	0	0	0	0	0	0	0	0	1	0	0	0	0	1
ENSG00000214306.3,AP001024.2,coding,chr11:107148338-107152554	NA	ENSG00000259989.1,CTD-2555A7.1.1,lncRNA,chr16:87577940-87589278	ENSG00000231447.1,RP1-14D6.7.1,lncRNA,chrX:151639850-151640796	ENSG00000212044.1,MIR548U,miRNA,chr1:147589954-147590046	NA	0	0	0	0	0	0	0	0	0	0	0	0	0	0
ENSG00000214306.3,AP001024.2,coding,chr11:107148338-107152554	NA	ENSG00000223817.1,CDH23-AS1,lncRNA,chr10:72937915-72941636	ENSG00000231447.1,RP1-14D6.7.1,lncRNA,chrX:151639850-151640796	ENSG00000212044.1,MIR548U,miRNA,chr1:147589954-147590046	NA	0	0	0	0	0	0	0	0	0	0	0	0	0	0
ENSG00000181464.2,AC005838.1,coding,chr17:15409521-15410315	NA	ENSG00000227169.1,RP1-37J18.1.1,lncRNA,chr1:4511654-4512065	ENSG00000231447.1,RP1-14D6.7.1,lncRNA,chrX:151639850-151640796	ENSG00000212044.1,MIR548U,miRNA,chr1:147589954-147590046	NA	0	0	0	0	0	0	0	0	0	0	0	0	0	0
ENSG00000257767.1,RP11-162P23.2.1,coding,chr12:110677852-110713605	NA	ENSG00000223817.1,CDH23-AS1,lncRNA,chr10:72937915-72941636	ENSG00000231447.1,RP1-14D6.7.1,lncRNA,chrX:151639850-151640796	ENSG00000212044.1,MIR548U,miRNA,chr1:147589954-147590046	NA	0	0	0	0	0	0	0	0	0	0	0	0	0	0
ENSG00000230891.2,AC103588.1.1,coding,chr3:25875027-25890195	NA	ENSG00000223817.1,CDH23-AS1,lncRNA,chr10:72937915-72941636	ENSG00000231447.1,RP1-14D6.7.1,lncRNA,chrX:151639850-151640796	ENSG00000212044.1,MIR548U,miRNA,chr1:147589954-147590046	NA	0	0	0	0	0	0	0	1	0	0	0	0	0	1
ENSG00000213578.4,CPLX3,coding,chr15:72905940-72911194	NA	ENSG00000230704.1,RP1-117P20.3.1,lncRNA,chr1:167998693-168000413	ENSG00000233376.1,RP5-881L22.6.1,lncRNA,chr20:42451677-42453591	ENSG00000208017.1,MIR140,miRNA,chr16:68524484-68524584	NA	0	0	0	0	0	0	0	0	0	0	0	0	0	0
ENSG00000213578.4,CPLX3,coding,chr15:72905940-72911194	NA	ENSG00000232624.1,RP11-478H13.3.1,lncRNA,chr10:29135881-29137154	ENSG00000233376.1,RP5-881L22.6.1,lncRNA,chr20:42451677-42453591	ENSG00000208017.1,MIR140,miRNA,chr16:68524484-68524584	NA	0	0	0	0	0	0	0	0	0	0	0	0	0	0
ENSG00000213578.4,CPLX3,coding,chr15:72905940-72911194	NA	ENSG00000226364.1,AC102948.2.1,lncRNA,chr17:48294479-48331947	ENSG00000233376.1,RP5-881L22.6.1,lncRNA,chr20:42451677-42453591	ENSG00000208017.1,MIR140,miRNA,chr16:68524484-68524584	NA	0	0	0	0	0	0	0	0	0	0	0	0	0	0
ENSG00000213578.4,CPLX3,coding,chr15:72905940-72911194	NA	ENSG00000232464.1,CTA-125H2.1.1,lncRNA,chr22:24685039-24709492	ENSG00000233376.1,RP5-881L22.6.1,lncRNA,chr20:42451677-42453591	ENSG00000208017.1,MIR140,miRNA,chr16:68524484-68524584	NA	0	0	0	0	0	0	0	0	0	0	0	0	0	0
ENSG00000213578.4,CPLX3,coding,chr15:72905940-72911194	NA	ENSG00000240777.2,RP11-58O15.1.1,lncRNA,chr3:55619670-55622172	ENSG00000233376.1,RP5-881L22.6.1,lncRNA,chr20:42451677-42453591	ENSG00000208017.1,MIR140,miRNA,chr16:68524484-68524584	NA	0	0	0	0	0	0	0	0	0	0	0	0	0	0
ENSG00000213578.4,CPLX3,coding,chr15:72905940-72911194	NA	ENSG00000232624.1,RP11-478H13.3.1,lncRNA,chr10:29135881-29137154	ENSG00000259108.1,CTD-3098H1.2.1,lncRNA,chr19:53058684-53060410	ENSG00000208017.1,MIR140,miRNA,chr16:68524484-68524584	NA	0	0	0	0	0	0	0	0	0	0	0	0	0	0
ENSG00000213578.4,CPLX3,coding,chr15:72905940-72911194	NA	ENSG00000226364.1,AC102948.2.1,lncRNA,chr17:48294479-48331947	ENSG00000259108.1,CTD-3098H1.2.1,lncRNA,chr19:53058684-53060410	ENSG00000208017.1,MIR140,miRNA,chr16:68524484-68524584	NA	0	0	0	0	0	0	0	0	0	0	0	0	0	0
ENSG00000213578.4,CPLX3,coding,chr15:72905940-72911194	NA	ENSG00000259108.1,CTD-3098H1.2.1,lncRNA,chr19:53058684-53060410	ENSG00000232464.1,CTA-125H2.1.1,lncRNA,chr22:24685039-24709492	ENSG00000208017.1,MIR140,miRNA,chr16:68524484-68524584	NA	0	0	0	0	0	0	0	0	0	0	0	0	0	0
ENSG00000213578.4,CPLX3,coding,chr15:72905940-72911194	NA	ENSG00000240777.2,RP11-58O15.1.1,lncRNA,chr3:55619670-55622172	ENSG00000259108.1,CTD-3098H1.2.1,lncRNA,chr19:53058684-53060410	ENSG00000208017.1,MIR140,miRNA,chr16:68524484-68524584	NA	0	0	0	0	0	0	0	0	0	0	0	0	0	0
ENSG00000186971.2,KRTAP13-4,coding,chr21:30724442-30725087	ENSG00000228567.2,VN1R4,coding,chr19:58461740-58462784	ENSG00000238004.1,AC009227.3.1,lncRNA,chr2:155024614-155025578	NA	ENSG00000251856.1,MIR449C,miRNA,chr5:54503846-54503938	NA	0	0	0	0	0	0	0	0	0	0	0	0	0	0
ENSG00000204702.4,OR2J1,coding,chr6:29176364-29177637	NA	ENSG00000230206.1,AC000364.1.1,lncRNA,chr7:126507982-126518208	ENSG00000253407.1,RP11-381I15.1.1,lncRNA,chr8:132211816-132226310	ENSG00000207755.1,MIR450A2,miRNA,chrX:133502203-133502303	NA	0	0	0	0	0	0	0	0	0	0	0	0	0	0
ENSG00000177151.3,OR2T35,coding,chr1:246868210-246869182	ENSG00000184724.4,KRTAP6-1,coding,chr21:30907620-30911767	ENSG00000259110.1,RP11-359N5.1.1,lncRNA,chr14:96690946-96694826	NA	ENSG00000221464.1,MIR1271,miRNA,chr5:175727554-175727640	NA	0	0	0	0	0	0	0	0	1	0	0	0	0	1
ENSG00000177151.3,OR2T35,coding,chr1:246868210-246869182	NA	ENSG00000259110.1,RP11-359N5.1.1,lncRNA,chr14:96690946-96694826	NA	ENSG00000221464.1,MIR1271,miRNA,chr5:175727554-175727640	ENSG00000207989.1,MIR493,miRNA,chr14:100405149-100405238	0	0	0	0	0	0	0	0	0	0	0	0	0	0
ENSG00000184724.4,KRTAP6-1,coding,chr21:30907620-30911767	NA	ENSG00000259110.1,RP11-359N5.1.1,lncRNA,chr14:96690946-96694826	NA	ENSG00000221464.1,MIR1271,miRNA,chr5:175727554-175727640	ENSG00000207989.1,MIR493,miRNA,chr14:100405149-100405238	0	0	0	0	0	0	0	1	0	0	0	0	0	1
ENSG00000177151.3,OR2T35,coding,chr1:246868210-246869182	ENSG00000184724.4,KRTAP6-1,coding,chr21:30907620-30911767	ENSG00000259110.1,RP11-359N5.1.1,lncRNA,chr14:96690946-96694826	NA	ENSG00000207989.1,MIR493,miRNA,chr14:100405149-100405238	NA	0	0	0	0	0	0	0	0	1	0	0	0	0	1
ENSG00000256671.3,LIMS3L,coding,chr2:110641954-110665048	NA	ENSG00000236889.1,RP11-38J22.1.1,lncRNA,chr1:204330706-204332893	ENSG00000239991.1,RP11-889D3.1.1,lncRNA,chr3:55175977-55184800	ENSG00000221430.1,MIR1294,miRNA,chr5:153706858-153707000	NA	0	0	0	0	0	0	0	0	0	1	0	1	0	2
ENSG00000221961.2,PRR21,coding,chr2:240629902-240631072	ENSG00000256671.3,LIMS3L,coding,chr2:110641954-110665048	ENSG00000239991.1,RP11-889D3.1.1,lncRNA,chr3:55175977-55184800	NA	ENSG00000221430.1,MIR1294,miRNA,chr5:153706858-153707000	NA	0	0	0	0	0	0	0	0	0	0	0	1	0	1
ENSG00000221961.2,PRR21,coding,chr2:240629902-240631072	NA	ENSG00000236889.1,RP11-38J22.1.1,lncRNA,chr1:204330706-204332893	ENSG00000239991.1,RP11-889D3.1.1,lncRNA,chr3:55175977-55184800	ENSG00000221430.1,MIR1294,miRNA,chr5:153706858-153707000	NA	0	0	0	0	0	0	0	0	0	1	0	1	0	2
ENSG00000255863.1,AC073610.5.1,coding,chr12:47602033-47619713	NA	ENSG00000232806.1,AP001610.9.1,lncRNA,chr21:41852921-41856755	ENSG00000233519.1,RP11-177F11.1.1,lncRNA,chr1:238630593-238631046	ENSG00000221410.1,MIR1238,miRNA,chr19:10523797-10523880	NA	0	0	0	0	0	0	0	0	0	0	0	0	0	0
ENSG00000244624.2,KRTAP20-1,coding,chr21:30910620-30910874	NA	ENSG00000261818.1,RP11-351A20.1.1,lncRNA,chr16:64172071-64238351	ENSG00000231238.1,LINC00349,lncRNA,chr13:18012636-18022837	ENSG00000207964.1,MIR628,miRNA,chr15:53452429-53452524	NA	0	0	0	0	0	0	0	0	0	0	0	1	0	1
ENSG00000184724.4,KRTAP6-1,coding,chr21:30907620-30911767	NA	ENSG00000261818.1,RP11-351A20.1.1,lncRNA,chr16:64172071-64238351	ENSG00000240095.1,RP11-88H10.3.1,lncRNA,chr3:147162231-147164100	ENSG00000221464.1,MIR1271,miRNA,chr5:175727554-175727640	NA	0	0	0	0	0	0	0	1	0	0	0	0	0	1
ENSG00000177151.3,OR2T35,coding,chr1:246868210-246869182	ENSG00000184724.4,KRTAP6-1,coding,chr21:30907620-30911767	ENSG00000261818.1,RP11-351A20.1.1,lncRNA,chr16:64172071-64238351	NA	ENSG00000221464.1,MIR1271,miRNA,chr5:175727554-175727640	NA	0	0	0	0	0	0	0	0	1	0	0	0	0	1
ENSG00000177151.3,OR2T35,coding,chr1:246868210-246869182	NA	ENSG00000261818.1,RP11-351A20.1.1,lncRNA,chr16:64172071-64238351	NA	ENSG00000221464.1,MIR1271,miRNA,chr5:175727554-175727640	ENSG00000207989.1,MIR493,miRNA,chr14:100405149-100405238	0	0	0	0	0	0	0	0	0	0	0	0	0	0
ENSG00000184724.4,KRTAP6-1,coding,chr21:30907620-30911767	NA	ENSG00000261818.1,RP11-351A20.1.1,lncRNA,chr16:64172071-64238351	NA	ENSG00000221464.1,MIR1271,miRNA,chr5:175727554-175727640	ENSG00000207989.1,MIR493,miRNA,chr14:100405149-100405238	0	0	0	0	0	0	0	1	0	0	0	0	0	1
ENSG00000181785.1,OR5AS1,coding,chr11:55554470-55555445	NA	ENSG00000261818.1,RP11-351A20.1.1,lncRNA,chr16:64172071-64238351	NA	ENSG00000221464.1,MIR1271,miRNA,chr5:175727554-175727640	ENSG00000207989.1,MIR493,miRNA,chr14:100405149-100405238	0	0	0	0	0	0	0	0	0	0	0	0	0	0
ENSG00000177151.3,OR2T35,coding,chr1:246868210-246869182	ENSG00000184724.4,KRTAP6-1,coding,chr21:30907620-30911767	ENSG00000261818.1,RP11-351A20.1.1,lncRNA,chr16:64172071-64238351	NA	ENSG00000207989.1,MIR493,miRNA,chr14:100405149-100405238	NA	0	0	0	0	0	0	0	0	1	0	0	0	0	1
ENSG00000204702.4,OR2J1,coding,chr6:29176364-29177637	NA	ENSG00000230206.1,AC000364.1.1,lncRNA,chr7:126507982-126518208	ENSG00000235518.2,AC011196.3.1,lncRNA,chr15:24453269-24455003	ENSG00000207755.1,MIR450A2,miRNA,chrX:133502203-133502303	NA	0	0	0	0	0	0	0	0	0	0	0	0	0	0
ENSG00000254834.2,OR5M10,coding,chr11:56100787-56101839	NA	ENSG00000234686.1,AC010971.1.1,lncRNA,chr7:49240278-49264958	ENSG00000231620.1,AP000855.4.1,lncRNA,chr21:19595800-19597927	ENSG00000207718.1,MIR15A,miRNA,chr13:49521255-49521338	NA	0	0	0	0	0	0	0	1	0	0	0	0	0	1
ENSG00000254834.2,OR5M10,coding,chr11:56100787-56101839	NA	ENSG00000231597.1,AC007557.4.1,lncRNA,chr2:217427356-217428100	ENSG00000231620.1,AP000855.4.1,lncRNA,chr21:19595800-19597927	ENSG00000207718.1,MIR15A,miRNA,chr13:49521255-49521338	NA	0	0	0	0	0	0	0	1	0	0	0	0	0	1
ENSG00000254834.2,OR5M10,coding,chr11:56100787-56101839	NA	ENSG00000236828.1,DMD-AS3,lncRNA,chrX:32682977-32684438	ENSG00000231620.1,AP000855.4.1,lncRNA,chr21:19595800-19597927	ENSG00000207718.1,MIR15A,miRNA,chr13:49521255-49521338	NA	0	0	0	0	0	0	0	1	0	0	0	0	0	1
ENSG00000244624.2,KRTAP20-1,coding,chr21:30910620-30910874	NA	ENSG00000234686.1,AC010971.1.1,lncRNA,chr7:49240278-49264958	ENSG00000231620.1,AP000855.4.1,lncRNA,chr21:19595800-19597927	ENSG00000207718.1,MIR15A,miRNA,chr13:49521255-49521338	NA	0	0	0	0	0	0	0	0	0	0	0	0	0	0
ENSG00000244624.2,KRTAP20-1,coding,chr21:30910620-30910874	NA	ENSG00000231597.1,AC007557.4.1,lncRNA,chr2:217427356-217428100	ENSG00000231620.1,AP000855.4.1,lncRNA,chr21:19595800-19597927	ENSG00000207718.1,MIR15A,miRNA,chr13:49521255-49521338	NA	0	0	0	0	0	0	0	0	0	0	0	0	0	0
ENSG00000244624.2,KRTAP20-1,coding,chr21:30910620-30910874	NA	ENSG00000236828.1,DMD-AS3,lncRNA,chrX:32682977-32684438	ENSG00000231620.1,AP000855.4.1,lncRNA,chr21:19595800-19597927	ENSG00000207718.1,MIR15A,miRNA,chr13:49521255-49521338	NA	0	0	0	0	0	0	0	0	0	0	0	0	0	0
ENSG00000244624.2,KRTAP20-1,coding,chr21:30910620-30910874	NA	ENSG00000234686.1,AC010971.1.1,lncRNA,chr7:49240278-49264958	ENSG00000231620.1,AP000855.4.1,lncRNA,chr21:19595800-19597927	ENSG00000208033.1,MIR609,miRNA,chr10:105968536-105968631	NA	0	0	0	0	0	0	0	0	0	0	0	0	0	0
ENSG00000244624.2,KRTAP20-1,coding,chr21:30910620-30910874	NA	ENSG00000236828.1,DMD-AS3,lncRNA,chrX:32682977-32684438	ENSG00000231620.1,AP000855.4.1,lncRNA,chr21:19595800-19597927	ENSG00000208033.1,MIR609,miRNA,chr10:105968536-105968631	NA	0	0	0	0	0	0	0	0	0	0	0	0	0	0
ENSG00000244624.2,KRTAP20-1,coding,chr21:30910620-30910874	NA	ENSG00000249808.1,CTD-2029E14.1.1,lncRNA,chr5:3231208-3234346	ENSG00000231620.1,AP000855.4.1,lncRNA,chr21:19595800-19597927	ENSG00000208033.1,MIR609,miRNA,chr10:105968536-105968631	NA	0	0	0	0	0	0	0	0	0	1	0	0	0	1
ENSG00000244624.2,KRTAP20-1,coding,chr21:30910620-30910874	NA	ENSG00000249747.1,RP11-308K2.1.1,lncRNA,chr4:188360133-188367494	ENSG00000231620.1,AP000855.4.1,lncRNA,chr21:19595800-19597927	ENSG00000208033.1,MIR609,miRNA,chr10:105968536-105968631	NA	0	0	0	0	0	0	0	0	0	1	0	0	0	1
ENSG00000257198.1,AL589645.1,coding,chr9:34822641-34828583	NA	ENSG00000250025.1,CTC-359M8.1.1,lncRNA,chr5:145666853-145736719	ENSG00000258719.1,RP11-232C2.3.1,lncRNA,chr14:78231416-78234218	ENSG00000207996.1,MIR301A,miRNA,chr17:54583278-54583364	NA	0	0	0	0	0	0	0	0	0	0	0	0	0	0
ENSG00000257198.1,AL589645.1,coding,chr9:34822641-34828583	NA	ENSG00000250025.1,CTC-359M8.1.1,lncRNA,chr5:145666853-145736719	ENSG00000237675.1,RP11-118H17.1.1,lncRNA,chr10:127252929-127257004	ENSG00000207996.1,MIR301A,miRNA,chr17:54583278-54583364	NA	0	0	0	0	0	0	0	0	0	0	0	0	0	0
ENSG00000204702.4,OR2J1,coding,chr6:29176364-29177637	NA	ENSG00000230206.1,AC000364.1.1,lncRNA,chr7:126507982-126518208	ENSG00000233234.1,RP11-740P5.2.1,lncRNA,chr1:2718274-2719117	ENSG00000207755.1,MIR450A2,miRNA,chrX:133502203-133502303	NA	0	0	0	0	0	0	0	0	0	0	0	0	0	0
ENSG00000259164.1,RP11-463C8.4.1,coding,chr14:76634406-76761558	NA	ENSG00000257470.1,RP11-397H6.1.1,lncRNA,chr12:95941929-95969038	ENSG00000238192.1,LL22NC03-121E8.4.1,lncRNA,chr22:46913941-46915482	ENSG00000199072.1,MIRLET7F1,miRNA,chr9:95978449-95978536	NA	0	0	0	0	0	0	0	0	0	0	0	1	0	1
ENSG00000259164.1,RP11-463C8.4.1,coding,chr14:76634406-76761558	NA	ENSG00000258747.1,RP11-163M18.1.1,lncRNA,chr14:44046359-44077466	ENSG00000238192.1,LL22NC03-121E8.4.1,lncRNA,chr22:46913941-46915482	ENSG00000199072.1,MIRLET7F1,miRNA,chr9:95978449-95978536	NA	0	0	0	0	0	0	0	0	0	0	0	1	0	1
ENSG00000244624.2,KRTAP20-1,coding,chr21:30910620-30910874	NA	ENSG00000230250.1,RP11-90C4.2.1,lncRNA,chr1:56153869-56183224	ENSG00000224091.1,AC104389.16.1,lncRNA,chr11:5182846-5185114	ENSG00000207805.1,MIR483,miRNA,chr11:2111939-2112015	NA	0	0	0	0	0	0	0	0	0	0	0	0	0	0
ENSG00000206422.1,LRRC30,coding,chr18:7221136-7222042	NA	ENSG00000230250.1,RP11-90C4.2.1,lncRNA,chr1:56153869-56183224	ENSG00000233079.1,RP11-90C4.3.1,lncRNA,chr1:56183347-56188380	ENSG00000221287.1,MIR1289-2,miRNA,chr5:132791186-132791297	NA	0	0	0	0	0	0	0	0	0	0	0	0	0	0
ENSG00000244624.2,KRTAP20-1,coding,chr21:30910620-30910874	NA	ENSG00000248744.1,RP11-362I1.1.1,lncRNA,chr4:44706313-44748426	ENSG00000230250.1,RP11-90C4.2.1,lncRNA,chr1:56153869-56183224	ENSG00000207805.1,MIR483,miRNA,chr11:2111939-2112015	NA	0	0	0	0	0	0	0	0	0	0	0	0	0	0
ENSG00000184724.4,KRTAP6-1,coding,chr21:30907620-30911767	NA	ENSG00000234918.1,RP11-20F24.2.1,lncRNA,chr10:37569820-37570983	ENSG00000225006.1,RP11-669M2.1.1,lncRNA,chr1:186744291-186772219	ENSG00000221464.1,MIR1271,miRNA,chr5:175727554-175727640	NA	0	0	0	0	0	0	0	1	0	0	0	0	0	1
ENSG00000204279.3,PAGE3,coding,chrX:55301572-55308004	ENSG00000184724.4,KRTAP6-1,coding,chr21:30907620-30911767	ENSG00000234918.1,RP11-20F24.2.1,lncRNA,chr10:37569820-37570983	NA	ENSG00000221464.1,MIR1271,miRNA,chr5:175727554-175727640	NA	0	0	0	0	0	0	0	0	1	0	0	0	0	1
ENSG00000184724.4,KRTAP6-1,coding,chr21:30907620-30911767	NA	ENSG00000234918.1,RP11-20F24.2.1,lncRNA,chr10:37569820-37570983	NA	ENSG00000221464.1,MIR1271,miRNA,chr5:175727554-175727640	ENSG00000207989.1,MIR493,miRNA,chr14:100405149-100405238	0	0	0	0	0	0	0	1	0	0	0	0	0	1
ENSG00000244362.1,KRTAP19-7,coding,chr21:30855064-30855504	NA	ENSG00000236733.1,RP11-203L2.4.1,lncRNA,chr9:70627138-70648011	ENSG00000234918.1,RP11-20F24.2.1,lncRNA,chr10:37569820-37570983	ENSG00000221464.1,MIR1271,miRNA,chr5:175727554-175727640	NA	0	0	0	0	0	0	0	0	0	0	0	0	0	0
ENSG00000244362.1,KRTAP19-7,coding,chr21:30855064-30855504	NA	ENSG00000236733.1,RP11-203L2.4.1,lncRNA,chr9:70627138-70648011	ENSG00000234918.1,RP11-20F24.2.1,lncRNA,chr10:37569820-37570983	ENSG00000207588.1,MIR593,miRNA,chr7:127509148-127509248	NA	0	0	0	0	0	0	0	0	0	0	0	0	0	0
ENSG00000259164.1,RP11-463C8.4.1,coding,chr14:76634406-76761558	NA	ENSG00000234519.1,RP3-495K2.1.1,lncRNA,chr6:169209837-169211444	ENSG00000234394.1,RP11-561O23.5.1,lncRNA,chr9:70133219-70135367	ENSG00000207863.1,MIR125B2,miRNA,chr21:16884427-16884516	NA	0	0	0	0	0	0	0	0	0	0	0	0	0	0
ENSG00000259164.1,RP11-463C8.4.1,coding,chr14:76634406-76761558	NA	ENSG00000257470.1,RP11-397H6.1.1,lncRNA,chr12:95941929-95969038	ENSG00000234394.1,RP11-561O23.5.1,lncRNA,chr9:70133219-70135367	ENSG00000207719.1,MIR623,miRNA,chr13:98806385-98806483	NA	0	0	0	0	0	0	0	0	0	0	0	0	0	0
ENSG00000259164.1,RP11-463C8.4.1,coding,chr14:76634406-76761558	NA	ENSG00000258747.1,RP11-163M18.1.1,lncRNA,chr14:44046359-44077466	ENSG00000234394.1,RP11-561O23.5.1,lncRNA,chr9:70133219-70135367	ENSG00000207719.1,MIR623,miRNA,chr13:98806385-98806483	NA	0	0	0	0	0	0	0	0	0	0	0	0	0	0
ENSG00000259164.1,RP11-463C8.4.1,coding,chr14:76634406-76761558	NA	ENSG00000236653.1,AC005235.1.1,lncRNA,chr2:198872331-198948066	ENSG00000234394.1,RP11-561O23.5.1,lncRNA,chr9:70133219-70135367	ENSG00000207863.1,MIR125B2,miRNA,chr21:16884427-16884516	NA	0	0	0	0	0	0	0	0	0	0	0	0	0	0
ENSG00000259164.1,RP11-463C8.4.1,coding,chr14:76634406-76761558	NA	ENSG00000257470.1,RP11-397H6.1.1,lncRNA,chr12:95941929-95969038	ENSG00000234394.1,RP11-561O23.5.1,lncRNA,chr9:70133219-70135367	ENSG00000207863.1,MIR125B2,miRNA,chr21:16884427-16884516	NA	0	0	0	0	0	0	0	0	0	0	0	0	0	0
ENSG00000259164.1,RP11-463C8.4.1,coding,chr14:76634406-76761558	NA	ENSG00000258747.1,RP11-163M18.1.1,lncRNA,chr14:44046359-44077466	ENSG00000234394.1,RP11-561O23.5.1,lncRNA,chr9:70133219-70135367	ENSG00000207863.1,MIR125B2,miRNA,chr21:16884427-16884516	NA	0	0	0	0	0	0	0	0	0	0	0	0	0	0
ENSG00000181371.2,OR5M8,coding,chr11:56014400-56015447	NA	ENSG00000237266.1,AC010729.3.1,lncRNA,chr2:5868223-5870179	ENSG00000258119.1,RP11-804F13.1.1,lncRNA,chr12:37224245-37269881	ENSG00000211589.1,MIR744,miRNA,chr17:11925940-11926038	NA	0	0	0	0	0	0	0	0	0	0	0	0	0	0
ENSG00000181371.2,OR5M8,coding,chr11:56014400-56015447	NA	ENSG00000223479.2,RP11-275A6.1.1,lncRNA,chr1:73873486-73947852	ENSG00000258119.1,RP11-804F13.1.1,lncRNA,chr12:37224245-37269881	ENSG00000211589.1,MIR744,miRNA,chr17:11925940-11926038	NA	0	0	0	0	0	0	0	0	0	0	0	0	0	0
ENSG00000257860.1,RP11-552I14.1.1,coding,chr12:102069749-102086217	NA	ENSG00000232279.1,GS1-204I12.1.1,lncRNA,chr1:183842938-183864282	ENSG00000260620.1,RP11-883G14.4.1,lncRNA,chr16:49646139-49647811	ENSG00000211575.1,MIR760,miRNA,chr1:94084975-94085055	NA	0	0	0	0	0	0	0	0	0	0	0	0	0	0
ENSG00000257860.1,RP11-552I14.1.1,coding,chr12:102069749-102086217	NA	ENSG00000234634.1,AC003664.1.1,lncRNA,chr17:13143225-13150802	ENSG00000260620.1,RP11-883G14.4.1,lncRNA,chr16:49646139-49647811	ENSG00000211575.1,MIR760,miRNA,chr1:94084975-94085055	NA	0	0	0	0	0	0	0	0	0	0	0	0	0	0
ENSG00000213578.4,CPLX3,coding,chr15:72905940-72911194	NA	ENSG00000232624.1,RP11-478H13.3.1,lncRNA,chr10:29135881-29137154	ENSG00000253322.1,RP11-388G22.1.1,lncRNA,chr8:58669278-58880142	ENSG00000208017.1,MIR140,miRNA,chr16:68524484-68524584	NA	0	0	0	0	0	0	0	0	0	0	0	0	0	0
ENSG00000213578.4,CPLX3,coding,chr15:72905940-72911194	NA	ENSG00000232464.1,CTA-125H2.1.1,lncRNA,chr22:24685039-24709492	ENSG00000253322.1,RP11-388G22.1.1,lncRNA,chr8:58669278-58880142	ENSG00000208017.1,MIR140,miRNA,chr16:68524484-68524584	NA	0	0	0	0	0	0	0	0	0	0	0	0	0	0
ENSG00000213578.4,CPLX3,coding,chr15:72905940-72911194	NA	ENSG00000240777.2,RP11-58O15.1.1,lncRNA,chr3:55619670-55622172	ENSG00000253322.1,RP11-388G22.1.1,lncRNA,chr8:58669278-58880142	ENSG00000208017.1,MIR140,miRNA,chr16:68524484-68524584	NA	0	0	0	0	0	0	0	0	0	0	0	0	0	0
ENSG00000204398.4,RP11-65D24.2.1,coding,chr13:111038638-111122956	NA	ENSG00000248490.1,CTD-3007L5.1.1,lncRNA,chr5:27448476-27472275	ENSG00000224091.1,AC104389.16.1,lncRNA,chr11:5182846-5185114	ENSG00000207805.1,MIR483,miRNA,chr11:2111939-2112015	NA	0	0	0	0	0	0	0	1	0	0	0	0	0	1
ENSG00000244624.2,KRTAP20-1,coding,chr21:30910620-30910874	NA	ENSG00000248490.1,CTD-3007L5.1.1,lncRNA,chr5:27448476-27472275	ENSG00000224091.1,AC104389.16.1,lncRNA,chr11:5182846-5185114	ENSG00000207805.1,MIR483,miRNA,chr11:2111939-2112015	NA	0	0	0	0	0	0	0	0	0	0	0	0	0	0
ENSG00000204398.4,RP11-65D24.2.1,coding,chr13:111038638-111122956	NA	ENSG00000248490.1,CTD-3007L5.1.1,lncRNA,chr5:27448476-27472275	ENSG00000249747.1,RP11-308K2.1.1,lncRNA,chr4:188360133-188367494	ENSG00000207805.1,MIR483,miRNA,chr11:2111939-2112015	NA	0	0	0	0	0	0	0	1	0	0	1	0	0	2
ENSG00000244624.2,KRTAP20-1,coding,chr21:30910620-30910874	NA	ENSG00000248490.1,CTD-3007L5.1.1,lncRNA,chr5:27448476-27472275	ENSG00000234686.1,AC010971.1.1,lncRNA,chr7:49240278-49264958	ENSG00000207805.1,MIR483,miRNA,chr11:2111939-2112015	NA	0	0	0	0	0	0	0	0	0	0	0	0	0	0
ENSG00000244624.2,KRTAP20-1,coding,chr21:30910620-30910874	NA	ENSG00000248490.1,CTD-3007L5.1.1,lncRNA,chr5:27448476-27472275	ENSG00000231597.1,AC007557.4.1,lncRNA,chr2:217427356-217428100	ENSG00000207805.1,MIR483,miRNA,chr11:2111939-2112015	NA	0	0	0	0	0	0	0	0	0	0	0	0	0	0
ENSG00000244624.2,KRTAP20-1,coding,chr21:30910620-30910874	NA	ENSG00000248490.1,CTD-3007L5.1.1,lncRNA,chr5:27448476-27472275	ENSG00000254178.1,RP11-299D14.2.1,lncRNA,chr8:25747561-25753568	ENSG00000207805.1,MIR483,miRNA,chr11:2111939-2112015	NA	0	0	0	0	0	0	0	0	0	0	0	0	0	0
ENSG00000244624.2,KRTAP20-1,coding,chr21:30910620-30910874	NA	ENSG00000248490.1,CTD-3007L5.1.1,lncRNA,chr5:27448476-27472275	ENSG00000236828.1,DMD-AS3,lncRNA,chrX:32682977-32684438	ENSG00000207805.1,MIR483,miRNA,chr11:2111939-2112015	NA	0	0	0	0	0	0	0	0	0	0	0	0	0	0
ENSG00000244624.2,KRTAP20-1,coding,chr21:30910620-30910874	NA	ENSG00000248490.1,CTD-3007L5.1.1,lncRNA,chr5:27448476-27472275	ENSG00000249747.1,RP11-308K2.1.1,lncRNA,chr4:188360133-188367494	ENSG00000207805.1,MIR483,miRNA,chr11:2111939-2112015	NA	0	0	0	0	0	0	0	0	0	0	1	0	0	1
ENSG00000181371.2,OR5M8,coding,chr11:56014400-56015447	NA	ENSG00000237266.1,AC010729.3.1,lncRNA,chr2:5868223-5870179	ENSG00000246316.3,RP11-492A10.1.1,lncRNA,chr5:113852592-114032006	ENSG00000211589.1,MIR744,miRNA,chr17:11925940-11926038	NA	0	0	0	0	0	0	0	0	0	0	0	0	0	0
ENSG00000181371.2,OR5M8,coding,chr11:56014400-56015447	NA	ENSG00000223479.2,RP11-275A6.1.1,lncRNA,chr1:73873486-73947852	ENSG00000246316.3,RP11-492A10.1.1,lncRNA,chr5:113852592-114032006	ENSG00000211589.1,MIR744,miRNA,chr17:11925940-11926038	NA	0	0	0	0	0	0	0	0	0	0	0	0	0	0
ENSG00000212722.5,KRTAP4-9,coding,chr17:36493984-36516266	NA	ENSG00000237266.1,AC010729.3.1,lncRNA,chr2:5868223-5870179	ENSG00000234306.1,RP11-271F18.1.1,lncRNA,chr10:10447148-10448456	ENSG00000211589.1,MIR744,miRNA,chr17:11925940-11926038	NA	0	0	0	0	0	0	0	0	0	0	0	0	0	0
ENSG00000181371.2,OR5M8,coding,chr11:56014400-56015447	ENSG00000212722.5,KRTAP4-9,coding,chr17:36493984-36516266	ENSG00000237266.1,AC010729.3.1,lncRNA,chr2:5868223-5870179	NA	ENSG00000211589.1,MIR744,miRNA,chr17:11925940-11926038	NA	0	0	0	0	0	0	0	0	0	0	0	0	0	0
ENSG00000212722.5,KRTAP4-9,coding,chr17:36493984-36516266	NA	ENSG00000237266.1,AC010729.3.1,lncRNA,chr2:5868223-5870179	ENSG00000223479.2,RP11-275A6.1.1,lncRNA,chr1:73873486-73947852	ENSG00000211589.1,MIR744,miRNA,chr17:11925940-11926038	NA	0	0	0	0	0	0	0	0	0	0	0	0	0	0
ENSG00000212722.5,KRTAP4-9,coding,chr17:36493984-36516266	NA	ENSG00000223479.2,RP11-275A6.1.1,lncRNA,chr1:73873486-73947852	ENSG00000234306.1,RP11-271F18.1.1,lncRNA,chr10:10447148-10448456	ENSG00000211589.1,MIR744,miRNA,chr17:11925940-11926038	NA	0	0	0	0	0	0	0	0	0	0	0	0	0	0
ENSG00000181371.2,OR5M8,coding,chr11:56014400-56015447	ENSG00000212722.5,KRTAP4-9,coding,chr17:36493984-36516266	ENSG00000223479.2,RP11-275A6.1.1,lncRNA,chr1:73873486-73947852	NA	ENSG00000211589.1,MIR744,miRNA,chr17:11925940-11926038	NA	0	0	0	0	0	0	0	0	0	0	0	0	0	0
ENSG00000212722.5,KRTAP4-9,coding,chr17:36493984-36516266	NA	ENSG00000225148.1,RP5-899B16.2.1,lncRNA,chr6:140218933-140240221	ENSG00000226716.1,AL589986.2.1,lncRNA,chr1:150361633-150364165	ENSG00000208009.1,MIR130A,miRNA,chr11:57165246-57165335	NA	0	0	0	0	0	0	0	0	0	0	0	0	0	0
ENSG00000184724.4,KRTAP6-1,coding,chr21:30907620-30911767	ENSG00000179709.3,NLRP8,coding,chr19:61151009-61191807	ENSG00000259971.1,RP11-44L9.3.1,lncRNA,chr16:72102575-72103054	NA	ENSG00000221464.1,MIR1271,miRNA,chr5:175727554-175727640	NA	0	0	0	0	0	0	0	1	0	0	0	0	0	1
ENSG00000177151.3,OR2T35,coding,chr1:246868210-246869182	ENSG00000184724.4,KRTAP6-1,coding,chr21:30907620-30911767	ENSG00000259971.1,RP11-44L9.3.1,lncRNA,chr16:72102575-72103054	NA	ENSG00000221464.1,MIR1271,miRNA,chr5:175727554-175727640	NA	0	0	0	0	0	0	0	0	1	0	0	0	0	1
ENSG00000206106.2,KRTAP22-2,coding,chr21:30884294-30884587	NA	ENSG00000261154.1,RP11-571O6.1.1,lncRNA,chr16:76182203-76202079	ENSG00000236306.1,RP11-33G16.1.1,lncRNA,chr9:25770053-25774560	ENSG00000207597.1,MIR490,miRNA,chr7:136238453-136238581	NA	0	0	0	0	0	0	0	0	0	0	0	0	0	0
ENSG00000237388.2,OR4A47,coding,chr11:48466844-48467908	NA	ENSG00000261154.1,RP11-571O6.1.1,lncRNA,chr16:76182203-76202079	ENSG00000236306.1,RP11-33G16.1.1,lncRNA,chr9:25770053-25774560	ENSG00000207597.1,MIR490,miRNA,chr7:136238453-136238581	NA	0	0	0	0	0	0	0	0	0	0	0	0	0	0
ENSG00000244624.2,KRTAP20-1,coding,chr21:30910620-30910874	NA	ENSG00000234686.1,AC010971.1.1,lncRNA,chr7:49240278-49264958	NA	ENSG00000253030.1,MIR2116,miRNA,chr15:57250673-57250753	ENSG00000221493.1,MIR320C1,miRNA,chr18:17517468-17517556	0	0	0	0	0	0	0	0	0	0	0	0	0	0
ENSG00000244624.2,KRTAP20-1,coding,chr21:30910620-30910874	NA	ENSG00000231597.1,AC007557.4.1,lncRNA,chr2:217427356-217428100	NA	ENSG00000253030.1,MIR2116,miRNA,chr15:57250673-57250753	ENSG00000221493.1,MIR320C1,miRNA,chr18:17517468-17517556	0	0	0	0	0	0	0	0	0	0	0	0	0	0
ENSG00000244624.2,KRTAP20-1,coding,chr21:30910620-30910874	NA	ENSG00000236828.1,DMD-AS3,lncRNA,chrX:32682977-32684438	NA	ENSG00000253030.1,MIR2116,miRNA,chr15:57250673-57250753	ENSG00000221493.1,MIR320C1,miRNA,chr18:17517468-17517556	0	0	0	0	0	0	0	0	0	0	0	0	0	0
ENSG00000244624.2,KRTAP20-1,coding,chr21:30910620-30910874	NA	ENSG00000236828.1,DMD-AS3,lncRNA,chrX:32682977-32684438	ENSG00000231238.1,LINC00349,lncRNA,chr13:18012636-18022837	ENSG00000221493.1,MIR320C1,miRNA,chr18:17517468-17517556	NA	0	0	0	0	0	0	0	0	0	0	0	0	0	0
ENSG00000244624.2,KRTAP20-1,coding,chr21:30910620-30910874	NA	ENSG00000234686.1,AC010971.1.1,lncRNA,chr7:49240278-49264958	ENSG00000231597.1,AC007557.4.1,lncRNA,chr2:217427356-217428100	ENSG00000221493.1,MIR320C1,miRNA,chr18:17517468-17517556	NA	0	0	0	0	0	0	0	0	0	0	0	0	0	0
ENSG00000244624.2,KRTAP20-1,coding,chr21:30910620-30910874	NA	ENSG00000236828.1,DMD-AS3,lncRNA,chrX:32682977-32684438	ENSG00000234686.1,AC010971.1.1,lncRNA,chr7:49240278-49264958	ENSG00000221493.1,MIR320C1,miRNA,chr18:17517468-17517556	NA	0	0	0	0	0	0	0	0	0	0	0	0	0	0
ENSG00000186967.6,KRTAP19-4,coding,chr21:30791012-30791322	NA	ENSG00000238169.1,RP11-165I9.8.1,lncRNA,chr13:24653578-24661898	ENSG00000227042.1,RP6-1O2.1.1,lncRNA,chrX:10170378-10293363	ENSG00000221067.1,MIR1280,miRNA,chr3:129563697-129563791	NA	0	0	0	0	0	0	0	0	0	0	0	0	0	0
ENSG00000249861.2,LGALS16,coding,chr19:44838397-44843127	ENSG00000197706.3,OR6C74,coding,chr12:53927248-53928353	ENSG00000230309.1,RP3-390M24.1.1,lncRNA,chr6:79370902-79372472	NA	ENSG00000208035.1,MIR143,miRNA,chr5:148788673-148788779	NA	0	0	0	0	0	0	0	0	0	0	0	0	0	0
ENSG00000244624.2,KRTAP20-1,coding,chr21:30910620-30910874	NA	ENSG00000257700.1,RP11-641A6.3.1,lncRNA,chr12:51372655-51376839	ENSG00000248183.1,RP11-655M19.1.1,lncRNA,chr4:28363522-28364003	ENSG00000208033.1,MIR609,miRNA,chr10:105968536-105968631	NA	0	0	0	0	0	0	0	0	0	0	0	0	0	0
ENSG00000244624.2,KRTAP20-1,coding,chr21:30910620-30910874	NA	ENSG00000234686.1,AC010971.1.1,lncRNA,chr7:49240278-49264958	ENSG00000248183.1,RP11-655M19.1.1,lncRNA,chr4:28363522-28364003	ENSG00000208033.1,MIR609,miRNA,chr10:105968536-105968631	NA	0	0	0	0	0	0	0	0	0	0	0	0	0	0
ENSG00000244624.2,KRTAP20-1,coding,chr21:30910620-30910874	NA	ENSG00000248183.1,RP11-655M19.1.1,lncRNA,chr4:28363522-28364003	NA	ENSG00000208033.1,MIR609,miRNA,chr10:105968536-105968631	ENSG00000207613.1,MIR181C,miRNA,chr19:13846512-13846622	0	0	0	0	0	0	0	0	0	0	0	0	0	0
ENSG00000244624.2,KRTAP20-1,coding,chr21:30910620-30910874	NA	ENSG00000236828.1,DMD-AS3,lncRNA,chrX:32682977-32684438	ENSG00000248183.1,RP11-655M19.1.1,lncRNA,chr4:28363522-28364003	ENSG00000208033.1,MIR609,miRNA,chr10:105968536-105968631	NA	0	0	0	0	0	0	0	0	0	0	0	0	0	0
ENSG00000244624.2,KRTAP20-1,coding,chr21:30910620-30910874	NA	ENSG00000249808.1,CTD-2029E14.1.1,lncRNA,chr5:3231208-3234346	ENSG00000248183.1,RP11-655M19.1.1,lncRNA,chr4:28363522-28364003	ENSG00000208033.1,MIR609,miRNA,chr10:105968536-105968631	NA	0	0	0	0	0	0	0	0	0	1	0	0	0	1
ENSG00000244624.2,KRTAP20-1,coding,chr21:30910620-30910874	NA	ENSG00000249747.1,RP11-308K2.1.1,lncRNA,chr4:188360133-188367494	ENSG00000248183.1,RP11-655M19.1.1,lncRNA,chr4:28363522-28364003	ENSG00000208033.1,MIR609,miRNA,chr10:105968536-105968631	NA	0	0	0	0	0	0	0	0	0	1	0	0	0	1
ENSG00000244624.2,KRTAP20-1,coding,chr21:30910620-30910874	NA	ENSG00000234686.1,AC010971.1.1,lncRNA,chr7:49240278-49264958	ENSG00000248183.1,RP11-655M19.1.1,lncRNA,chr4:28363522-28364003	ENSG00000207613.1,MIR181C,miRNA,chr19:13846512-13846622	NA	0	0	0	0	0	0	0	0	0	0	0	0	0	0
ENSG00000181464.2,AC005838.1,coding,chr17:15409521-15410315	NA	ENSG00000227169.1,RP1-37J18.1.1,lncRNA,chr1:4511654-4512065	ENSG00000226717.1,RP11-87N24.2.1,lncRNA,chr9:10603201-10608218	ENSG00000212044.1,MIR548U,miRNA,chr1:147589954-147590046	NA	0	0	0	0	0	0	0	0	0	0	0	0	0	0
ENSG00000186971.2,KRTAP13-4,coding,chr21:30724442-30725087	NA	ENSG00000234938.2,AC012668.1.1,lncRNA,chr2:216103414-216118494	ENSG00000197176.3,RP11-76E12.1.1,lncRNA,chr14:97168736-97222748	ENSG00000221287.1,MIR1289-2,miRNA,chr5:132791186-132791297	NA	0	0	0	0	0	0	0	0	0	0	0	0	0	0
ENSG00000225597.2,FAM74A1,coding,chr9:39890337-39897240	NA	ENSG00000250902.1,RP11-301H24.4.1,lncRNA,chr4:146655216-146657720	ENSG00000226047.1,RP11-196I18.4.1,lncRNA,chr9:108919560-108923807	ENSG00000215930.1,MIR942,miRNA,chr1:117438787-117438873	NA	0	0	0	0	0	0	0	0	0	0	0	0	0	0
ENSG00000225597.2,FAM74A1,coding,chr9:39890337-39897240	NA	ENSG00000236130.1,RP11-23B15.1.1,lncRNA,chr9:99608037-99612111	ENSG00000226047.1,RP11-196I18.4.1,lncRNA,chr9:108919560-108923807	ENSG00000215930.1,MIR942,miRNA,chr1:117438787-117438873	NA	0	0	0	0	0	0	0	0	0	0	0	0	0	0
ENSG00000244624.2,KRTAP20-1,coding,chr21:30910620-30910874	NA	ENSG00000236828.1,DMD-AS3,lncRNA,chrX:32682977-32684438	ENSG00000226047.1,RP11-196I18.4.1,lncRNA,chr9:108919560-108923807	ENSG00000215930.1,MIR942,miRNA,chr1:117438787-117438873	NA	0	0	0	0	0	0	0	0	0	0	0	0	0	0
ENSG00000184724.4,KRTAP6-1,coding,chr21:30907620-30911767	NA	ENSG00000226047.1,RP11-196I18.4.1,lncRNA,chr9:108919560-108923807	NA	ENSG00000221464.1,MIR1271,miRNA,chr5:175727554-175727640	ENSG00000207989.1,MIR493,miRNA,chr14:100405149-100405238	0	0	0	0	0	0	0	1	0	0	0	0	0	1
ENSG00000256671.3,LIMS3L,coding,chr2:110641954-110665048	ENSG00000235173.2,FAM203A,coding,chr8:145264659-145267734	ENSG00000248330.1,RP11-782E2.1.1,lncRNA,chr4:137007587-137054285	NA	ENSG00000199030.1,MIRLET7C,miRNA,chr21:16834013-16834107	NA	0	0	0	0	0	0	0	0	0	0	0	0	0	0
ENSG00000235173.2,FAM203A,coding,chr8:145264659-145267734	NA	ENSG00000260741.1,CTC-391G2.1.1,lncRNA,chr16:23113699-23131926	ENSG00000254380.1,RP11-317J10.4.1,lncRNA,chr8:86623379-86639992	ENSG00000207573.1,MIR550A2,miRNA,chr7:32739117-32739214	NA	0	0	0	0	0	0	0	0	0	0	0	0	0	0
ENSG00000204848.4,FAM75A2,coding,chr9:39874974-39881210	ENSG00000147926.9,FAM75A3,coding,chr9:40690290-40696537	ENSG00000227510.1,RP11-196P2.1.1,lncRNA,chr13:60389176-60390140	NA	ENSG00000215930.1,MIR942,miRNA,chr1:117438787-117438873	NA	0	0	0	0	0	0	0	0	0	0	0	0	0	0
ENSG00000225597.2,FAM74A1,coding,chr9:39890337-39897240	NA	ENSG00000250902.1,RP11-301H24.4.1,lncRNA,chr4:146655216-146657720	ENSG00000227510.1,RP11-196P2.1.1,lncRNA,chr13:60389176-60390140	ENSG00000215930.1,MIR942,miRNA,chr1:117438787-117438873	NA	0	0	0	0	0	0	0	0	0	0	0	0	0	0
ENSG00000225597.2,FAM74A1,coding,chr9:39890337-39897240	NA	ENSG00000236130.1,RP11-23B15.1.1,lncRNA,chr9:99608037-99612111	ENSG00000227510.1,RP11-196P2.1.1,lncRNA,chr13:60389176-60390140	ENSG00000215930.1,MIR942,miRNA,chr1:117438787-117438873	NA	0	0	0	0	0	0	0	0	0	0	0	0	0	0
ENSG00000177151.3,OR2T35,coding,chr1:246868210-246869182	ENSG00000186146.1,DEFB131,coding,chr4:9055357-9061338	ENSG00000227510.1,RP11-196P2.1.1,lncRNA,chr13:60389176-60390140	NA	ENSG00000215930.1,MIR942,miRNA,chr1:117438787-117438873	NA	0	0	0	0	0	0	0	0	0	0	0	0	0	0
ENSG00000244624.2,KRTAP20-1,coding,chr21:30910620-30910874	NA	ENSG00000234686.1,AC010971.1.1,lncRNA,chr7:49240278-49264958	ENSG00000227510.1,RP11-196P2.1.1,lncRNA,chr13:60389176-60390140	ENSG00000215930.1,MIR942,miRNA,chr1:117438787-117438873	NA	0	0	0	0	0	0	0	0	0	0	0	0	0	0
ENSG00000244624.2,KRTAP20-1,coding,chr21:30910620-30910874	NA	ENSG00000231597.1,AC007557.4.1,lncRNA,chr2:217427356-217428100	ENSG00000227510.1,RP11-196P2.1.1,lncRNA,chr13:60389176-60390140	ENSG00000215930.1,MIR942,miRNA,chr1:117438787-117438873	NA	0	0	0	0	0	0	0	0	0	0	0	0	0	0
ENSG00000244624.2,KRTAP20-1,coding,chr21:30910620-30910874	NA	ENSG00000236828.1,DMD-AS3,lncRNA,chrX:32682977-32684438	ENSG00000227510.1,RP11-196P2.1.1,lncRNA,chr13:60389176-60390140	ENSG00000215930.1,MIR942,miRNA,chr1:117438787-117438873	NA	0	0	0	0	0	0	0	0	0	0	0	0	0	0
ENSG00000244624.2,KRTAP20-1,coding,chr21:30910620-30910874	NA	ENSG00000249747.1,RP11-308K2.1.1,lncRNA,chr4:188360133-188367494	ENSG00000227510.1,RP11-196P2.1.1,lncRNA,chr13:60389176-60390140	ENSG00000215930.1,MIR942,miRNA,chr1:117438787-117438873	NA	0	0	0	0	0	0	0	0	0	1	0	0	0	1
ENSG00000244624.2,KRTAP20-1,coding,chr21:30910620-30910874	NA	ENSG00000249747.1,RP11-308K2.1.1,lncRNA,chr4:188360133-188367494	ENSG00000227510.1,RP11-196P2.1.1,lncRNA,chr13:60389176-60390140	ENSG00000221537.1,MIR548H1,miRNA,chr14:63631494-63631596	NA	0	0	0	0	0	0	0	0	0	1	0	0	0	1
ENSG00000244624.2,KRTAP20-1,coding,chr21:30910620-30910874	NA	ENSG00000236828.1,DMD-AS3,lncRNA,chrX:32682977-32684438	ENSG00000231238.1,LINC00349,lncRNA,chr13:18012636-18022837	ENSG00000221028.1,MIR1231,miRNA,chr1:200044361-200044453	NA	0	0	0	0	0	0	0	0	0	0	0	0	0	0
ENSG00000244624.2,KRTAP20-1,coding,chr21:30910620-30910874	NA	ENSG00000234686.1,AC010971.1.1,lncRNA,chr7:49240278-49264958	ENSG00000231597.1,AC007557.4.1,lncRNA,chr2:217427356-217428100	ENSG00000221028.1,MIR1231,miRNA,chr1:200044361-200044453	NA	0	0	0	0	0	0	0	0	0	0	0	0	0	0
ENSG00000244624.2,KRTAP20-1,coding,chr21:30910620-30910874	NA	ENSG00000236828.1,DMD-AS3,lncRNA,chrX:32682977-32684438	ENSG00000234686.1,AC010971.1.1,lncRNA,chr7:49240278-49264958	ENSG00000221028.1,MIR1231,miRNA,chr1:200044361-200044453	NA	0	0	0	0	0	0	0	0	0	0	0	0	0	0
ENSG00000176742.1,OR51V1,coding,chr11:5177540-5178506	NA	ENSG00000223623.1,RP3-425P12.1.1,lncRNA,chr6:25161833-25165280	ENSG00000235717.1,AC068542.2.1,lncRNA,chr2:115307876-115309635	ENSG00000221410.1,MIR1238,miRNA,chr19:10523797-10523880	NA	0	0	0	0	0	0	0	0	0	0	0	0	0	0
ENSG00000150261.2,OR8K1,coding,chr11:55869996-55871083	NA	ENSG00000223623.1,RP3-425P12.1.1,lncRNA,chr6:25161833-25165280	ENSG00000235717.1,AC068542.2.1,lncRNA,chr2:115307876-115309635	ENSG00000221410.1,MIR1238,miRNA,chr19:10523797-10523880	NA	0	0	0	0	0	0	0	0	0	0	0	0	0	0
ENSG00000176742.1,OR51V1,coding,chr11:5177540-5178506	NA	ENSG00000237480.1,RP5-947P14.1.1,lncRNA,chr1:106417391-106428644	ENSG00000235717.1,AC068542.2.1,lncRNA,chr2:115307876-115309635	ENSG00000221410.1,MIR1238,miRNA,chr19:10523797-10523880	NA	0	0	0	0	0	0	0	0	0	0	0	0	0	0
ENSG00000150261.2,OR8K1,coding,chr11:55869996-55871083	NA	ENSG00000237480.1,RP5-947P14.1.1,lncRNA,chr1:106417391-106428644	ENSG00000235717.1,AC068542.2.1,lncRNA,chr2:115307876-115309635	ENSG00000221410.1,MIR1238,miRNA,chr19:10523797-10523880	NA	0	0	0	0	0	0	0	0	0	0	0	0	0	0
ENSG00000176742.1,OR51V1,coding,chr11:5177540-5178506	NA	ENSG00000237843.1,AC016903.2.1,lncRNA,chr2:205048323-205080640	ENSG00000235717.1,AC068542.2.1,lncRNA,chr2:115307876-115309635	ENSG00000221410.1,MIR1238,miRNA,chr19:10523797-10523880	NA	0	0	0	0	0	0	0	0	0	0	0	0	0	0
ENSG00000150261.2,OR8K1,coding,chr11:55869996-55871083	NA	ENSG00000237843.1,AC016903.2.1,lncRNA,chr2:205048323-205080640	ENSG00000235717.1,AC068542.2.1,lncRNA,chr2:115307876-115309635	ENSG00000221410.1,MIR1238,miRNA,chr19:10523797-10523880	NA	0	0	0	0	0	0	0	0	0	0	0	0	0	0
ENSG00000176742.1,OR51V1,coding,chr11:5177540-5178506	NA	ENSG00000234686.1,AC010971.1.1,lncRNA,chr7:49240278-49264958	ENSG00000235717.1,AC068542.2.1,lncRNA,chr2:115307876-115309635	ENSG00000221410.1,MIR1238,miRNA,chr19:10523797-10523880	NA	0	0	0	0	0	0	0	0	0	0	0	0	0	0
ENSG00000176742.1,OR51V1,coding,chr11:5177540-5178506	NA	ENSG00000235717.1,AC068542.2.1,lncRNA,chr2:115307876-115309635	ENSG00000231597.1,AC007557.4.1,lncRNA,chr2:217427356-217428100	ENSG00000221410.1,MIR1238,miRNA,chr19:10523797-10523880	NA	0	0	0	0	0	0	0	0	0	0	0	0	0	0
ENSG00000176742.1,OR51V1,coding,chr11:5177540-5178506	ENSG00000150261.2,OR8K1,coding,chr11:55869996-55871083	ENSG00000235717.1,AC068542.2.1,lncRNA,chr2:115307876-115309635	NA	ENSG00000221410.1,MIR1238,miRNA,chr19:10523797-10523880	NA	0	0	0	0	0	0	0	0	0	0	0	0	0	0
ENSG00000176742.1,OR51V1,coding,chr11:5177540-5178506	NA	ENSG00000236634.1,AC016903.1.1,lncRNA,chr2:205043043-205046805	ENSG00000235717.1,AC068542.2.1,lncRNA,chr2:115307876-115309635	ENSG00000221410.1,MIR1238,miRNA,chr19:10523797-10523880	NA	0	0	0	0	0	0	0	0	0	0	0	0	0	0
ENSG00000176742.1,OR51V1,coding,chr11:5177540-5178506	NA	ENSG00000234116.1,RP11-261C10.1.1,lncRNA,chr1:241235769-241237393	ENSG00000235717.1,AC068542.2.1,lncRNA,chr2:115307876-115309635	ENSG00000221410.1,MIR1238,miRNA,chr19:10523797-10523880	NA	0	0	0	0	0	0	0	0	0	0	0	0	0	0
ENSG00000176742.1,OR51V1,coding,chr11:5177540-5178506	NA	ENSG00000233519.1,RP11-177F11.1.1,lncRNA,chr1:238630593-238631046	ENSG00000235717.1,AC068542.2.1,lncRNA,chr2:115307876-115309635	ENSG00000221410.1,MIR1238,miRNA,chr19:10523797-10523880	NA	0	0	0	0	0	0	0	0	0	0	0	0	0	0
ENSG00000150261.2,OR8K1,coding,chr11:55869996-55871083	NA	ENSG00000234686.1,AC010971.1.1,lncRNA,chr7:49240278-49264958	ENSG00000235717.1,AC068542.2.1,lncRNA,chr2:115307876-115309635	ENSG00000221410.1,MIR1238,miRNA,chr19:10523797-10523880	NA	0	0	0	0	0	0	0	0	0	0	0	0	0	0
ENSG00000150261.2,OR8K1,coding,chr11:55869996-55871083	NA	ENSG00000235717.1,AC068542.2.1,lncRNA,chr2:115307876-115309635	ENSG00000231597.1,AC007557.4.1,lncRNA,chr2:217427356-217428100	ENSG00000221410.1,MIR1238,miRNA,chr19:10523797-10523880	NA	0	0	0	0	0	0	0	0	0	0	0	0	0	0
ENSG00000150261.2,OR8K1,coding,chr11:55869996-55871083	NA	ENSG00000236634.1,AC016903.1.1,lncRNA,chr2:205043043-205046805	ENSG00000235717.1,AC068542.2.1,lncRNA,chr2:115307876-115309635	ENSG00000221410.1,MIR1238,miRNA,chr19:10523797-10523880	NA	0	0	0	0	0	0	0	0	0	0	0	0	0	0
ENSG00000150261.2,OR8K1,coding,chr11:55869996-55871083	NA	ENSG00000234116.1,RP11-261C10.1.1,lncRNA,chr1:241235769-241237393	ENSG00000235717.1,AC068542.2.1,lncRNA,chr2:115307876-115309635	ENSG00000221410.1,MIR1238,miRNA,chr19:10523797-10523880	NA	0	0	0	0	0	0	0	0	0	0	0	0	0	0
ENSG00000150261.2,OR8K1,coding,chr11:55869996-55871083	NA	ENSG00000233519.1,RP11-177F11.1.1,lncRNA,chr1:238630593-238631046	ENSG00000235717.1,AC068542.2.1,lncRNA,chr2:115307876-115309635	ENSG00000221410.1,MIR1238,miRNA,chr19:10523797-10523880	NA	0	0	0	0	0	0	0	0	0	0	0	0	0	0
ENSG00000167098.7,SUN5,coding,chr20:31035239-31055900	NA	ENSG00000226208.1,RP11-99H8.1.1,lncRNA,chr1:70954203-70958560	ENSG00000256750.1,RP11-3L23.2.1,lncRNA,chr12:117680941-117683867	ENSG00000207729.1,MIR556,miRNA,chr1:160578959-160579054	NA	0	0	0	0	0	0	0	0	0	0	0	0	0	0
ENSG00000184276.2,DEFB108B,coding,chr11:71221893-71226404	NA	ENSG00000226208.1,RP11-99H8.1.1,lncRNA,chr1:70954203-70958560	ENSG00000256750.1,RP11-3L23.2.1,lncRNA,chr12:117680941-117683867	ENSG00000199122.1,MIR148B,miRNA,chr12:53017266-53017365	NA	0	0	0	0	0	0	0	0	0	0	0	0	0	0
ENSG00000230344.2,AC007308.1,coding,chr22:19407334-19410201	NA	ENSG00000226208.1,RP11-99H8.1.1,lncRNA,chr1:70954203-70958560	NA	ENSG00000207729.1,MIR556,miRNA,chr1:160578959-160579054	ENSG00000207546.1,MIR548C,miRNA,chr12:63302555-63302652	0	0	0	0	0	0	0	0	0	0	0	0	0	0
ENSG00000204703.3,OR2B3,coding,chr6:29161963-29163069	NA	ENSG00000226208.1,RP11-99H8.1.1,lncRNA,chr1:70954203-70958560	NA	ENSG00000207729.1,MIR556,miRNA,chr1:160578959-160579054	ENSG00000207546.1,MIR548C,miRNA,chr12:63302555-63302652	0	0	0	0	0	0	0	0	0	0	0	0	0	0
ENSG00000204703.3,OR2B3,coding,chr6:29161963-29163069	NA	ENSG00000226208.1,RP11-99H8.1.1,lncRNA,chr1:70954203-70958560	ENSG00000254861.1,RP11-945A11.2.1,lncRNA,chr11:23739451-23782720	ENSG00000207546.1,MIR548C,miRNA,chr12:63302555-63302652	NA	0	0	0	0	0	0	0	0	0	0	1	0	0	1
ENSG00000204703.3,OR2B3,coding,chr6:29161963-29163069	NA	ENSG00000226208.1,RP11-99H8.1.1,lncRNA,chr1:70954203-70958560	NA	ENSG00000207546.1,MIR548C,miRNA,chr12:63302555-63302652	ENSG00000207983.1,MIR613,miRNA,chr12:12808849-12808944	0	0	0	0	0	0	0	0	0	0	0	0	0	0
ENSG00000204703.3,OR2B3,coding,chr6:29161963-29163069	NA	ENSG00000231140.1,RP11-347J14.7.1,lncRNA,chr9:39385733-39387403	ENSG00000226208.1,RP11-99H8.1.1,lncRNA,chr1:70954203-70958560	ENSG00000207546.1,MIR548C,miRNA,chr12:63302555-63302652	NA	0	0	0	0	0	0	0	0	0	0	0	0	0	0
ENSG00000244624.2,KRTAP20-1,coding,chr21:30910620-30910874	NA	ENSG00000234686.1,AC010971.1.1,lncRNA,chr7:49240278-49264958	ENSG00000226208.1,RP11-99H8.1.1,lncRNA,chr1:70954203-70958560	ENSG00000253030.1,MIR2116,miRNA,chr15:57250673-57250753	NA	0	0	0	0	0	0	0	0	0	0	0	0	0	0
ENSG00000244624.2,KRTAP20-1,coding,chr21:30910620-30910874	NA	ENSG00000226208.1,RP11-99H8.1.1,lncRNA,chr1:70954203-70958560	ENSG00000231597.1,AC007557.4.1,lncRNA,chr2:217427356-217428100	ENSG00000253030.1,MIR2116,miRNA,chr15:57250673-57250753	NA	0	0	0	0	0	0	0	0	0	0	0	0	0	0
ENSG00000244624.2,KRTAP20-1,coding,chr21:30910620-30910874	NA	ENSG00000236828.1,DMD-AS3,lncRNA,chrX:32682977-32684438	ENSG00000226208.1,RP11-99H8.1.1,lncRNA,chr1:70954203-70958560	ENSG00000253030.1,MIR2116,miRNA,chr15:57250673-57250753	NA	0	0	0	0	0	0	0	0	0	0	0	0	0	0
ENSG00000204703.3,OR2B3,coding,chr6:29161963-29163069	NA	ENSG00000226208.1,RP11-99H8.1.1,lncRNA,chr1:70954203-70958560	ENSG00000254861.1,RP11-945A11.2.1,lncRNA,chr11:23739451-23782720	ENSG00000207729.1,MIR556,miRNA,chr1:160578959-160579054	NA	0	0	0	0	0	0	0	0	0	0	1	0	0	1
ENSG00000183292.8,AC140481.2.1,coding,chr2:131044871-131058204	NA	ENSG00000226208.1,RP11-99H8.1.1,lncRNA,chr1:70954203-70958560	ENSG00000254861.1,RP11-945A11.2.1,lncRNA,chr11:23739451-23782720	ENSG00000207729.1,MIR556,miRNA,chr1:160578959-160579054	NA	0	0	0	0	0	0	0	0	0	0	1	0	0	1
ENSG00000204703.3,OR2B3,coding,chr6:29161963-29163069	NA	ENSG00000236267.1,AP006216.5.1,lncRNA,chr11:116189129-116189929	ENSG00000226208.1,RP11-99H8.1.1,lncRNA,chr1:70954203-70958560	ENSG00000207729.1,MIR556,miRNA,chr1:160578959-160579054	NA	0	0	0	0	0	0	0	0	0	0	0	0	0	0
ENSG00000244624.2,KRTAP20-1,coding,chr21:30910620-30910874	NA	ENSG00000236267.1,AP006216.5.1,lncRNA,chr11:116189129-116189929	ENSG00000226208.1,RP11-99H8.1.1,lncRNA,chr1:70954203-70958560	ENSG00000207729.1,MIR556,miRNA,chr1:160578959-160579054	NA	0	0	0	0	0	0	0	0	0	0	0	0	0	0
ENSG00000204703.3,OR2B3,coding,chr6:29161963-29163069	NA	ENSG00000226208.1,RP11-99H8.1.1,lncRNA,chr1:70954203-70958560	NA	ENSG00000207729.1,MIR556,miRNA,chr1:160578959-160579054	ENSG00000207983.1,MIR613,miRNA,chr12:12808849-12808944	0	0	0	0	0	0	0	0	0	0	0	0	0	0
ENSG00000183292.8,AC140481.2.1,coding,chr2:131044871-131058204	NA	ENSG00000226208.1,RP11-99H8.1.1,lncRNA,chr1:70954203-70958560	NA	ENSG00000207729.1,MIR556,miRNA,chr1:160578959-160579054	ENSG00000207983.1,MIR613,miRNA,chr12:12808849-12808944	0	0	0	0	0	0	0	0	0	0	0	0	0	0
ENSG00000204703.3,OR2B3,coding,chr6:29161963-29163069	NA	ENSG00000231140.1,RP11-347J14.7.1,lncRNA,chr9:39385733-39387403	ENSG00000226208.1,RP11-99H8.1.1,lncRNA,chr1:70954203-70958560	ENSG00000207729.1,MIR556,miRNA,chr1:160578959-160579054	NA	0	0	0	0	0	0	0	0	0	0	0	0	0	0
ENSG00000183292.8,AC140481.2.1,coding,chr2:131044871-131058204	NA	ENSG00000231140.1,RP11-347J14.7.1,lncRNA,chr9:39385733-39387403	ENSG00000226208.1,RP11-99H8.1.1,lncRNA,chr1:70954203-70958560	ENSG00000207729.1,MIR556,miRNA,chr1:160578959-160579054	NA	0	0	0	0	0	0	0	0	0	0	0	0	0	0
ENSG00000244624.2,KRTAP20-1,coding,chr21:30910620-30910874	NA	ENSG00000231140.1,RP11-347J14.7.1,lncRNA,chr9:39385733-39387403	ENSG00000226208.1,RP11-99H8.1.1,lncRNA,chr1:70954203-70958560	ENSG00000207729.1,MIR556,miRNA,chr1:160578959-160579054	NA	0	0	0	0	0	0	0	0	0	0	0	0	0	0
ENSG00000230344.2,AC007308.1,coding,chr22:19407334-19410201	NA	ENSG00000248942.1,CTD-2275D24.4.1,lncRNA,chr5:73637990-73639906	ENSG00000226208.1,RP11-99H8.1.1,lncRNA,chr1:70954203-70958560	ENSG00000207729.1,MIR556,miRNA,chr1:160578959-160579054	NA	0	0	0	0	0	0	0	0	0	0	0	0	0	0
ENSG00000185990.6,F8A3,coding,chrX:154339769-154341470	NA	ENSG00000226208.1,RP11-99H8.1.1,lncRNA,chr1:70954203-70958560	ENSG00000256750.1,RP11-3L23.2.1,lncRNA,chr12:117680941-117683867	ENSG00000207729.1,MIR556,miRNA,chr1:160578959-160579054	NA	0	0	0	0	0	0	0	0	0	0	0	0	0	0
ENSG00000183292.8,AC140481.2.1,coding,chr2:131044871-131058204	NA	ENSG00000226208.1,RP11-99H8.1.1,lncRNA,chr1:70954203-70958560	ENSG00000256750.1,RP11-3L23.2.1,lncRNA,chr12:117680941-117683867	ENSG00000207729.1,MIR556,miRNA,chr1:160578959-160579054	NA	0	0	0	0	0	0	0	0	0	0	0	0	0	0
ENSG00000204703.3,OR2B3,coding,chr6:29161963-29163069	NA	ENSG00000226208.1,RP11-99H8.1.1,lncRNA,chr1:70954203-70958560	ENSG00000236653.1,AC005235.1.1,lncRNA,chr2:198872331-198948066	ENSG00000207729.1,MIR556,miRNA,chr1:160578959-160579054	NA	0	0	0	0	0	0	0	0	0	0	0	0	0	0
ENSG00000204703.3,OR2B3,coding,chr6:29161963-29163069	NA	ENSG00000249747.1,RP11-308K2.1.1,lncRNA,chr4:188360133-188367494	ENSG00000226208.1,RP11-99H8.1.1,lncRNA,chr1:70954203-70958560	ENSG00000207729.1,MIR556,miRNA,chr1:160578959-160579054	NA	0	0	0	0	0	0	0	0	0	1	0	0	0	1
ENSG00000244624.2,KRTAP20-1,coding,chr21:30910620-30910874	NA	ENSG00000234686.1,AC010971.1.1,lncRNA,chr7:49240278-49264958	ENSG00000226208.1,RP11-99H8.1.1,lncRNA,chr1:70954203-70958560	ENSG00000207729.1,MIR556,miRNA,chr1:160578959-160579054	NA	0	0	0	0	0	0	0	0	0	0	0	0	0	0
ENSG00000244624.2,KRTAP20-1,coding,chr21:30910620-30910874	NA	ENSG00000226208.1,RP11-99H8.1.1,lncRNA,chr1:70954203-70958560	ENSG00000231597.1,AC007557.4.1,lncRNA,chr2:217427356-217428100	ENSG00000207729.1,MIR556,miRNA,chr1:160578959-160579054	NA	0	0	0	0	0	0	0	0	0	0	0	0	0	0
ENSG00000244624.2,KRTAP20-1,coding,chr21:30910620-30910874	NA	ENSG00000236828.1,DMD-AS3,lncRNA,chrX:32682977-32684438	ENSG00000226208.1,RP11-99H8.1.1,lncRNA,chr1:70954203-70958560	ENSG00000207729.1,MIR556,miRNA,chr1:160578959-160579054	NA	0	0	0	0	0	0	0	0	0	0	0	0	0	0
ENSG00000244624.2,KRTAP20-1,coding,chr21:30910620-30910874	NA	ENSG00000249747.1,RP11-308K2.1.1,lncRNA,chr4:188360133-188367494	ENSG00000226208.1,RP11-99H8.1.1,lncRNA,chr1:70954203-70958560	ENSG00000207729.1,MIR556,miRNA,chr1:160578959-160579054	NA	0	0	0	0	0	0	0	0	0	1	0	0	0	1
ENSG00000183292.8,AC140481.2.1,coding,chr2:131044871-131058204	NA	ENSG00000226208.1,RP11-99H8.1.1,lncRNA,chr1:70954203-70958560	ENSG00000256750.1,RP11-3L23.2.1,lncRNA,chr12:117680941-117683867	ENSG00000207983.1,MIR613,miRNA,chr12:12808849-12808944	NA	0	0	0	0	0	0	0	0	0	0	0	0	0	0
ENSG00000177243.3,DEFB103B,coding,chr8:7273819-7275280	ENSG00000204873.3,KRTAP9-3,coding,chr17:36642240-36643231	ENSG00000234686.1,AC010971.1.1,lncRNA,chr7:49240278-49264958	NA	ENSG00000221410.1,MIR1238,miRNA,chr19:10523797-10523880	NA	0	0	0	0	0	0	0	0	0	0	0	0	0	0
ENSG00000177243.3,DEFB103B,coding,chr8:7273819-7275280	ENSG00000204873.3,KRTAP9-3,coding,chr17:36642240-36643231	ENSG00000231597.1,AC007557.4.1,lncRNA,chr2:217427356-217428100	NA	ENSG00000221410.1,MIR1238,miRNA,chr19:10523797-10523880	NA	0	0	0	0	0	0	0	0	0	0	0	0	0	0
ENSG00000177243.3,DEFB103B,coding,chr8:7273819-7275280	ENSG00000204873.3,KRTAP9-3,coding,chr17:36642240-36643231	ENSG00000234116.1,RP11-261C10.1.1,lncRNA,chr1:241235769-241237393	NA	ENSG00000221410.1,MIR1238,miRNA,chr19:10523797-10523880	NA	0	0	0	0	0	0	0	0	0	0	0	0	0	0
ENSG00000177243.3,DEFB103B,coding,chr8:7273819-7275280	ENSG00000204873.3,KRTAP9-3,coding,chr17:36642240-36643231	ENSG00000233519.1,RP11-177F11.1.1,lncRNA,chr1:238630593-238631046	NA	ENSG00000221410.1,MIR1238,miRNA,chr19:10523797-10523880	NA	0	0	0	0	0	0	0	0	0	0	0	0	0	0
ENSG00000204873.3,KRTAP9-3,coding,chr17:36642240-36643231	NA	ENSG00000223623.1,RP3-425P12.1.1,lncRNA,chr6:25161833-25165280	ENSG00000237480.1,RP5-947P14.1.1,lncRNA,chr1:106417391-106428644	ENSG00000221410.1,MIR1238,miRNA,chr19:10523797-10523880	NA	0	0	0	0	0	0	0	0	0	0	0	0	0	0
ENSG00000204873.3,KRTAP9-3,coding,chr17:36642240-36643231	NA	ENSG00000223623.1,RP3-425P12.1.1,lncRNA,chr6:25161833-25165280	ENSG00000234686.1,AC010971.1.1,lncRNA,chr7:49240278-49264958	ENSG00000221410.1,MIR1238,miRNA,chr19:10523797-10523880	NA	0	0	0	0	0	0	0	0	0	0	0	0	0	0
ENSG00000204873.3,KRTAP9-3,coding,chr17:36642240-36643231	NA	ENSG00000223623.1,RP3-425P12.1.1,lncRNA,chr6:25161833-25165280	ENSG00000250078.1,RP11-577G20.2.1,lncRNA,chr4:59123086-59126044	ENSG00000221410.1,MIR1238,miRNA,chr19:10523797-10523880	NA	0	0	0	0	0	0	0	0	0	0	0	0	0	0
ENSG00000204873.3,KRTAP9-3,coding,chr17:36642240-36643231	NA	ENSG00000223623.1,RP3-425P12.1.1,lncRNA,chr6:25161833-25165280	ENSG00000223809.1,RP11-85L21.6.1,lncRNA,chrX:134084832-134085198	ENSG00000221410.1,MIR1238,miRNA,chr19:10523797-10523880	NA	0	0	0	0	0	0	0	0	0	0	0	0	0	0
ENSG00000204873.3,KRTAP9-3,coding,chr17:36642240-36643231	ENSG00000206536.1,OR5K3,coding,chr3:99592199-99593165	ENSG00000223623.1,RP3-425P12.1.1,lncRNA,chr6:25161833-25165280	NA	ENSG00000221410.1,MIR1238,miRNA,chr19:10523797-10523880	NA	0	0	0	0	0	0	0	0	0	0	0	0	0	0
ENSG00000204873.3,KRTAP9-3,coding,chr17:36642240-36643231	NA	ENSG00000226566.1,RP11-436F21.1.1,lncRNA,chr9:105164054-105231995	ENSG00000223623.1,RP3-425P12.1.1,lncRNA,chr6:25161833-25165280	ENSG00000221410.1,MIR1238,miRNA,chr19:10523797-10523880	NA	0	0	0	0	0	0	0	0	0	0	0	0	0	0
[truncated: 9,673 more rows]

## Sheet: Select
coding RNA 1	coding RNA 2	lncRNA 1	lncRNA 2	miRNA 1	miRNA 2	coding RNA 1 is log rank test significant	coding RNA 2 is log rank test significant	lncRNA 1 is log rank test significant	lncRNA 2 is log rank test significant	miRNA 1 is log rank test significant	miRNA 2 is log rank test significant	At least one of the coding RNA, lncRNA, miRNA is log rank test significant	coding RNA 1 is ANOVA significant	coding RNA 2 is ANOVA significant	lncRNA 1 is ANOVA significant	lncRNA 2 is ANOVA significant	miRNA 1 is ANOVA significant	miRNA 2 is ANOVA significant	At least one of the coding RNA, lncRNA, miRNA is ANOVA significant
[truncated: 15 more rows]
